# Supplementary material for: Large next-generation sequencing gene panels in genetic heart disease: yield of pathogenic variants and variants of unknown significance
Source: Neth Heart J. 2019 Mar 7;27(6):304–9. doi: 10.1007/s12471-019-1250-5 (PMC6533346; doi:10.1007/s12471-019-1250-5)
Supplement: Supplementary file 2 — Detected variants in the panels [file 12471_2019_1250_MOESM2_ESM.xlsx]

## Sheet: Blad1
Online Supplementary File 2 Detected variants in the panels (AR=arrhythmia gene panel; CM=cardiomyopathy gene panel; both=both panels analysed)
Variant	Panel	Gene	Reference sequence	c.	p.	Class	Reclassification	Diagnosis	Case*	Total variants of case	Rank of variant	dbSNP	gnomAD allele frequency all	gnomAD allele frequency African/African American	gnomAD allele frequency Admixed American	gnomAD allele frequency Ashkenazi Jewish	gnomAD allele frequency East Asian	gnomAD allele frequency Finnish	gnomAD allele frequency Non-Finnish European	gnomAD allele frequency South Asian	gnomAD allele frequency other	BLOSUM45	BLOSUM62	BLOSUM80	SIFTcat	SIFTval	PolyPhenCat	PolyPhenVal	Grantham	CADD PHRED
1	AR	ABCC9	NM_020297.3	c.2238-1G>A	p.(Ser746del)	3		CPVT	100	1	1	rs141281214	369/267994=0.001	1/23118=0	2/33032=0	116/9816=0.012	0/18030=0	0/25022=0	51/122908=0	193/29918=0.006	6/6150=0.001				NA	NA	NA	NA	NA	34	19.03
2	AR	ABCC9	NM_020297.3	c.2770-13A>G	p.?	3		UA	105	1	1	rs184123387	183/276708=0.001	1/24034=0	2/34314=0	1/10146=0	0/18858=0	84/25766=0.003	92/126372=0.001	1/30774=0	2/6444=0				NA	NA	NA	NA	NA	2005
3	AR	ABCC9	NM_020297.3	c.2867-5T>C	p.?	3		UA	104	1	1	rs369841241	18/242910=0	0/15228=0	0/33370=0	0/9792=0	0/17160=0	0/21024=0	17/110274=0	0/30654=0	1/5408=0				NA	NA	NA	NA	NA	11.56
4	AR	ABCC9	NM_020297.3	c.4570_4572delinsAAAT	p.(Leu1524Lysfs*5)	3		UA	102	2	1	rs755718495													NA	NA	NA	NA	NA
5	AR	ABCC9	NM_020297.3	c.4570_4572delinsAAAT	p.(Leu1524Lysfs*5)	3		UA	103	1	1	rs755718495													NA	NA	NA	NA	NA
6	AR	ABCC9	NM_020297.3	c.1609T>A	p.(Ser537Thr)	3		ARVC	101	1	1	rs780072385	2/245752=0	0/15296=0	0/33516=0	0/9844=0	0/17246=0	2/22294=0	0/111314=0	0/30776=0	0/5466=0	2	1	1	tolerated	0.08	possibly_damaging	0.626	58	24.0
7	AR	ABCC9	NM_020297.2	c.1770G>A	p.(=)	3		LQTS	184	2	2	rs746239063	16/245806=0	0/15302=0	3/33490=0	0/9840=0	0/17240=0	1/22282=0	11/111396=0	1/30782=0	0/5474=0				NA	NA	NA	NA	NA	1165
8	AR	ABCC9	NM_020297.3	c.3221A>G	p.(Asn1074Ser)	3		UA	107	1	1	rs765629988	4/246064=0	0/15298=0	0/33578=0	0/9846=0	0/17248=0	0/22294=0	4/111542=0	0/30782=0	0/5476=0	1	1	0	tolerated	0.1	benign	0.406	46	22.5
9	AR	ABCC9	NM_005691.3	c.4322T>C	p.(Val441Ala)	3		UA	310	2	2	rs140448278	1/245910=0	0/15300=0	0/33538=0	0/9840=0	0/17240=0	0/22300=0	1/111436=0	0/30778=0	0/5478=0	0	0	0	tolerated	0.98	benign	0	64	15.96
10	AR	ABCC9	NM_020297.3	c.5G>A	p.(Ser2Asn)	3		UA	106	1	1											1	1	0	tolerated	0.1	benign	0	46	20.2
11	CM	ACTC1	NM_005159.4	c.301G>A	p.(Glu101Lys)	5		NCCM	511	1	1	rs193922680	1/246270=0	0/15304=0	0/33582=0	0/9848=0	0/17248=0	0/22300=0	1/111720=0	0/30782=0	0/5486=0	1	1	1	deleterious	0.04		possibly damaging	0.878	56	23.3
12	CM	ACTC1	NM_005159.4	c.455-6G>A	p.?	3		NCCM	467	2	1											NA	NA	NA	NA	NA		NA	NA	NA
13	CM	ACTC1	NM_005159.4	c.623G>A	p.(Arg208His)	3		DCM	736	2	1	rs142839840	10/246260=0	1/15304=0	4/33582=0	1/9850=0	1/17248=0	0/22300=0	2/111708=0	1/30782=0	0/5486=0	0	0	0	deleterious	0.05	benign	0	29	25.6	23.6
14	CM	ACTC1	NM_005159.4	c.821C>T	p.(Ala274Val)	3		DCM	737	1	1	rs538052265										0	0	0	tolerated	0.14	probably_damaging	0.947	64	27.4
15	CM	ACTC1	NM_005159.4	c.821C>T	p.(Ala274Val)	3		DCM	1618	1	1	rs538052265										0	0	0	tolerated	0.14	probably_damaging	0.947	64	27.4
16	CM	ACTN2	NM_001103.3	c.1159G>C	p.(Glu387Gln)	3		HCM	738	1	1											2	2	2	tolerated	0.09	probably_damaging	0.97	29	25.5
17	CM	ACTN2	NM_001103.3	c.1159G>C	p.(Glu387Gln)	3		UCM	1446	4	3											2	2	2	tolerated	0.09	probably_damaging	0.97	29	25.5	20.0
18	CM	ACTN2	NM_001103.3	c.1162T>A	p.(Trp388Arg)	3		HCM	468	2	1	rs376144003	18/277050=0	0/23952=0	0/34420=0	0/10150=0	12/18852=0.001	0/25776=0	0/126652=0	4/30782=0	2/6466=0	-2	-3	-4	deleterious	0		probably damaging	0.998	101
19	CM	ACTN2	NM_001103.3	c.1162T>A	p.(Trp388Arg)	3		NCCM	739	1	1	rs376144003	18/277050=0	0/23952=0	0/34420=0	0/10150=0	12/18852=0.001	0/25776=0	0/126652=0	4/30782=0	2/6466=0	-2	-3	-4	deleterious	0.01	probably_damaging	0.997	101	31
20	CM	ACTN2	NM_001103.3	c.1192C>T	p.(Arg398Cys)	3		UCM	740	2	1	rs148189507	8/277194=0	5/24026=0	0/34420=0	0/10150=0	0/18866=0	0/25794=0	3/126690=0	0/30782=0	0/6466=0	-3	-3	-4	deleterious	0	probably_damaging	0.98	180	32
21	CM	ACTN2	NM_001103.2	c.1423G>A	p.(Asp475Asn)	3		HCM	469	2	1	rs80257412	1985/277168=0.007	11/24024=0	13/34414=0	0/10152=0	1773/18860=0.094	0/25786=0	4/126704=0	151/30760=0.005	33/6468=0.005	2	1	1	tolerated	0.17		probably damaging	0.994	23
22	CM	ACTN2	NM_001103.3	c.1423G>A	p.(Asp475Asn)	3		ARVC	470	2	1	rs80257412	1985/277168=0.007	11/24024=0	13/34414=0	0/10152=0	1773/18860=0.094	0/25786=0	4/126704=0	151/30760=0.005	33/6468=0.005	2	1	1	tolerated	0.17		probably damaging	0.994	23
23	CM	ACTN2	NM_001103.3	c.1541T>C	p.(Ile514Thr)	3		DCM	741	3	1	rs371954663	1/246194=0	0/15302=0	0/33582=0	0/9850=0	0/17248=0	0/22292=0	1/111654=0	0/30780=0	0/5486=0	-1	-1	-1	deleterious	0	benign	0.119	89	24.4
24	CM	ACTN2	NM_001103.3	c.1606A>G	p.(Met536Val)	3		NCCM	1542	3	1	rs755708114	3/246230=0	0/15304=0	0/33582=0	0/9850=0	0/17248=0	0/22298=0	3/111682=0	0/30780=0	0/5486=0	1	1	1	tolerated	0.29	benign	0.001	21	19.47	23.5
25	CM	ACTN2	NM_001103.3	c.1646A>T	p.(Glu549Val)	3		HCM	471	2	1	rs149794430	3/277210=0	1/24028=0	2/34420=0	0/10152=0	0/18870=0	0/25790=0	0/126700=0	0/30782=0	0/6468=0	-3	-2	-3	deleterious	0.03		possibly damaging	0.625	121
26	CM	ACTN2	NM_001103.3	c.166G>A	p.(Gly56Ser)	3		HCM	1022	4	2	rs758034866	12/246210=0	0/15304=0	0/33574=0	0/9848=0	2/17246=0	1/22298=0	1/111684=0	8/30770=0	0/5486=0	0	0	-1	tolerated	0.15	probably_damaging	0.996	56	26.5	30
27	CM	ACTN2	NM_001278344.1	c.1744-1G>A	p.?	3		UCM	742	3	1														NA	NA	NA	NA	NA	34
28	CM	ACTN2	NM_001103.3	c.1918C>T	p.(Arg640Cys)	3		UCM	743	2	1	rs769453411	4/276964=0	1/24006=0	2/34416=0	0/10148=0	0/18862=0	0/25712=0	0/126574=0	0/30782=0	1/6464=0	-3	-3	-4	deleterious	0.01	probably_damaging	0.995	180	34
29	CM	ACTN2	NM_001103.3	c.1928G>A	p.(Arg643His)	3		DCM	1529	3	2	rs201335965	13/276920=0	0/24026=0	2/34418=0	0/10150=0	0/18868=0	0/25790=0	6/126426=0	5/30782=0	0/6460=0	0	0	0	deleterious	0	benign	0.438	29	26.7	25.3
30	CM	ACTN2	NM_001103.2.	c.2051A>T	p.(Asn684Ile)	3		HCM	1103	3	2	rs576783493										-2	-3	-4	tolerated	0.06	benign	0.179	149	22.4	12.17
31	CM	ACTN2	NM_001103.3	c.2569G>C	p.(Asp857His)	3		UCM	613	1	1	rs533267299	6/245978=0	0/15298=0	0/33580=0	0/9848=0	0/17246=0	0/22298=0	6/111444=0	0/30782=0	0/5482=0	0	-1	-2	deleterious	0.01		possibly damaging	0.481	81
32	CM	ACTN2	NM_001103.3	c.2669G>A	p.(Gly890Glu)	3		NCCM	472	2	1											-2	-2	-3	deleterious	0		probably damaging	1	98
33	CM	ACTN2	NM_001103.3	c.433delinsTT	p.(Asp145Leufs*5)	3		NCCM	612	1	1											NA	NA	NA	NA	NA		NA	NA	NA
34	CM	ACTN2	NM_001103.3	c.508A>G	p.(Asn170Asp)	3		UCM	744	2	1	rs148954170										2	1	1	deleterious	0.02	probably_damaging	0.956	23	27.0
35	CM	ACTN2	NM_001103.3	c.517A>G	p.(Ile173Val)	3		HCM	1607	2	1	rs749860792	7/277206=0	7/24034=0	0/34420=0	0/10152=0	0/18870=0	0/25794=0	0/126688=0	0/30782=0	0/6466=0	3	3	3	tolerated	1	benign	0	29	18.40	27.0
36	CM	ACTN2	NM_001278344.1	c.718G>C	p.(Glu240Gln)	3		HCM	745	4	1	rs764031568	1/246032=0	0/15290=0	0/33576=0	0/9846=0	0/17238=0	0/22298=0	0/111526=0	1/30780=0	0/5478=0	2	2	2	tolerated	0.1	probably_damaging	0.993	29	25.2
37	CM	ACTN2	NM_001103.3	c.794C>T	p.(Ala265Val)	3		DCM	917	6	2	rs794728965	1/246140=0	0/15300=0	1/33572=0	0/9846=0	0/17248=0	0/22296=0	0/111640=0	0/30752=0	0/5486=0	0	0	0	deleterious	0.01	possibly_damaging	0.85	64	32	27.9
38	CM	ACTN2	NM_001103.3	c.893G>A	p.(Arg298His)	3		HCM	816	2	2	rs142482143	128/277026=0	0/23984=0	11/34420=0	1/10152=0	1/18864=0	2/25782=0	110/126584=0.001	3/30782=0	0/6458=0	0	0	0	deleterious	0.03	benign	0.421	29	25.4
39	AR	AKAP9	NM_005751.4	c.10205A>C	p.(Gln3402Pro)	3		BRS	121	2	1		1/245316=0	0/15240=0	0/33508=0	0/9814=0	0/17204=0	0/22290=0	1/111088=0	0/30696=0	0/5476=0	-1	-1	-2	deleterious	0	possibly_damaging	0.804	76	25.6
40	AR	AKAP9	NM_005751.4	c.10672A>G	p.(Ile3558Val)	3		UA	117	2	1	rs144054367	198/276694=0.001	5/24012=0	31/34390=0.001	30/10146=0.003	0/18850=0	3/25750=0	118/126354=0.001	0/30736=0	11/6456=0.002	3	3	3	tolerated	0.14	benign	0.009	29	16.60
41	AR	AKAP9	NM_005751.4	c.11229G>A	p.(Met3743Ile)	3		UA	108	1	1	rs143306820	18/277054=0	2/24016=0	1/34420=0	0/10148=0	1/18870=0	0/25790=0	12/126572=0	0/30782=0	2/6456=0	2	1	1	deleterious	0.01	probably_damaging	0.991	10	28.8
42	AR	AKAP9	NM_005751.4	c.11323A>T	p.(Ile3775Phe)	3		AF	119	1	1	rs910995516	1/30982=0	0/8736=0	0/838=0	0/302=0	0/1622=0	0/3492=0	1/15010=0	0/0=0	0/982=0	0	0	-1	deleterious	0	benign	0.063	21	22.3
43	AR	AKAP9	NM_005751.4	c.1396C>T	p.(Arg466Trp)	3		UA	8	2	1	rs373876340	8/276368=0	5/24006=0	0/34362=0	0/10120=0	0/18866=0	0/25732=0	3/126062=0	0/30768=0	0/6452=0	-2	-3	-4	deleterious	0	possibly damaging	0.956	101	23.8	28.5
44	AR	AKAP9	NM_005751.4	c.1900G>A	p.(Glu634Lys)	3		UA	123	1	1	rs368006874	40/276520=0	0/23998=0	3/34340=0	0/10134=0	0/18862=0	24/25662=0.001	13/126318=0	0/30762=0	0/6444=0	1	1	1	deleterious	0	probably_damaging	0.994	56	31
45	AR	AKAP9	NM_005751.4	c.1946G>A	p.(Arg649Gln)	3		UA	120	1	1	rs758729015	1/244952=0	0/15166=0	0/33480=0	0/9802=0	0/17238=0	0/22226=0	1/110854=0	0/30738=0	0/5448=0	1	1	1	tolerated	0.29	benign	0.001	43	13.79
46	AR	AKAP9	NM_005751.4	c.2003A>C	p.(Asp668Ala)	3		BRS	109	3	1											-2	-2	-2	deleterious	0	possibly_damaging	0.585	126	25.8
47	AR	AKAP9	NM_005751.4	c.2581T>C	p.(Tyr861His)	3		BRS	22	1	1	rs61757557	216/271996=0.001	1/23778=0	13/33970=0	0/9946=0	0/18736=0	126/25702=0.005	73/123806=0.001	0/29690=0	3/6368=0	2	2	2	deleterious	0	probably damaging	0.999	83	24.9
48	AR	AKAP9	NM_005751.4	c.2581T>C	p.(Tyr861His)	3		UA	115	1	1	rs61757557	216/271996=0.001	1/23778=0	13/33970=0	0/9946=0	0/18736=0	126/25702=0.005	73/123806=0.001	0/29690=0	3/6368=0	2	2	2	deleterious	0	probably_damaging	0.981	83	26.8	27.0
49	AR	AKAP9	NM_005751.4	c.2609G>A	p.(Cys870Tyr)	3		UA	114	2	1	rs187255726	51/271722=0	0/23702=0	0/34022=0	0/9926=0	50/18742=0.003	0/25658=0	0/123404=0	0/29900=0	1/6368=0	-3	-2	-3	deleterious	0	probably_damaging	0.996	194	26.4	26.7
50	AR	AKAP9	NM_005751.4	c.3430T>C	p.(Cys1144Arg)	3		UA	9	2	1	rs141039834	121/277140=0	27/24026=0.001	2/34418=0	0/10150=0	75/18868=0.004	0/25786=0	0/126646=0	11/30782=0	6/6464=0.001	-3	-3	-4	tolerated	0.25	probably damaging	0.993	180	20.5	23.1
51	AR	AKAP9	NM_005751.4	c.4709C>T	p.(Ser1570Leu)	3		UA	10	2	1	rs121908566	2/239262=0	0/14992=0	0/32604=0	0/9568=0	0/16712=0	0/22044=0	2/108802=0	0/29274=0	0/5266=0	-3	-2	-3	tolerated	1	benign	0	145	0.013
52	AR	AKAP9	NM_005751.4	c.4826G>A	p.(Arg1609Lys)	3		BRS	110	1	1	rs148146011	133/276954=0	0/24030=0	73/34374=0.002	8/10142=0.001	0/18862=0	2/25756=0	32/126564=0	2/30770=0	16/6456=0.002	3	2	2	tolerated	0.2	benign	0.057	26	19.99	30
53	AR	AKAP9	NM_005751.4	c.4837A>G	p.(Met1613Val)	3		UA	116	3	1	rs193922723	1/246070=0	0/15302=0	0/33538=0	0/9838=0	0/17242=0	0/22298=0	1/111598=0	0/30776=0	0/5478=0	1	1	1	tolerated	0.07	probably_damaging	0.915	21	22.8
54	AR	AKAP9	NM_005751.4	c.4885G>C	p.(Glu1629Gln)	3		UA	125	1	1		2/245394=0	0/15256=0	0/33442=0	0/9834=0	0/17204=0	0/22248=0	0/111246=0	1/30706=0	1/5458=0	2	2	2	deleterious	0	probably_damaging	0.994	29	26.2
55	AR	AKAP9	NM_005751.4	c.6195G>A	p.(Met2065Ile)	3		LQTS	113	1	1	rs369212896	7/274138=0	1/23848=0	0/34204=0	0/10068=0	0/18742=0	0/25684=0	6/124740=0	0/30472=0	0/6380=0	2	1	1	tolerated	0.36	benign	0.318	10	17.53	23.7
56	AR	AKAP9	NM_005751.4	c.6505A>C	p.(Lys2169Gln)	3		BRS	26	1	1	rs1037879433										1	1	1	deleterious	0.03	probably damaging	1	53	25.1
57	AR	AKAP9	NM_005751.4	c.6765+3_6765+8del	p.?	3		UA	6	2	2											NA	NA	NA	NA	NA	NA	NA	NA	NA
58	AR	AKAP9	NM_005751.4	c.6765+3_6765+8del	p.?	3		UA	122	1	1														NA	NA	NA	NA	NA	14.95
59	AR	AKAP9	NM_005751.4	c.7488T>G	p.(Asn2496Lys)	3		BRS	118	1	1	rs201977551	86/276346=0	2/23970=0	4/34376=0	16/10118=0.002	0/18844=0	0/25738=0	50/126116=0	8/30732=0	6/6452=0.001	0	0	0	tolerated	0.79	benign	0.036	94	8076
60	AR	AKAP9	NM_005751.4	c.7775T>A	p.(Leu2592Gln)	3		UA	124	1	1	rs754011064	2/276862=0	1/24020=0	0/34392=0	0/10140=0	0/18854=0	0/25770=0	0/126508=0	1/30718=0	0/6460=0	-2	-2	-3	tolerated	0.24	possibly_damaging	0.542	113	15.17
61	AR	AKAP9	NM_005751.4	c.7798G>T	p.(Asp2600Tyr)	3		UA	27	1	1											-2	-3	-4	deleterious	0.01	benign	0.141	160	5.479
62	AR	AKAP9	NM_005751.4	c.8552A>C	p.(Glu2851Ala)	3		UA	126	2	1											-1	-1	-1	deleterious	0	possibly_damaging	0.691	107	27.4
63	AR	AKAP9	NM_005751.4	c.10459G>A	p.(Gln3487Lys)	3		LQTS	29	1	1	rs61757664	157/277094=0.001	3/24026=0	14/34416=0	28/10150=0.003	0/18870=0	0/25794=0	81/126594=0.001	18/30782=0.001	13/6462=0.002	1	1	1	tolerated	0.11	probably damaging	0.982	56	25.8
64	AR	AKAP9	NM_005751.4	c.10459G>A	p.(Glu3487Lys)	3		BRS	309	3	3	rs61757664	157/277094=0.001	3/24026=0	14/34416=0	28/10150=0.003	0/18870=0	0/25794=0	81/126594=0.001	18/30782=0.001	13/6462=0.002	1	1	1	deleterious	0.04	possibly_damaging	0.831	56	26.3
65	AR	AKAP9	NM_005751.4	c.11494C>T	p.(Arg3832Cys)	3		UA	31	1	1	rs140053176	30/277128=0	1/24018=0	0/34420=0	0/10152=0	17/18866=0.001	2/25764=0	7/126664=0	1/30782=0	2/6462=0	-3	-3	-4	deleterious	0.01	probably damaging	1	180	34
66	AR	AKAP9	NM_005751.4	c.1262G>A	p.(Arg421Gln)	3		LQTS	111	1	1	rs864622705	5/245172=0	0/15228=0	1/33526=0	0/9806=0	1/17232=0	0/22292=0	1/110872=0	2/30748=0	0/5468=0	1	1	1	deleterious	0	possibly_damaging	0.766	43	25.2	25.7
67	AR	AKAP9	NM_005751.4	c.1826C>A	p.(Ala609Asp)	3		LQTS	21	1	1	rs140973676										-2	-2	-2	deleterious	0	probably damaging	1	126	27.9
68	AR	AKAP9	NM_005751.4	c.2554T>C	p.(Phe852Leu)	3		BRS	322	2	2	rs372844164	3/241392=0	0/15110=0	0/33082=0	0/9630=0	0/17104=0	0/22194=0	3/109274=0	0/29604=0	0/5394=0	1	0	0	deleterious	0.03	probably_damaging	0.967	22	28.4
69	AR	AKAP9	NM_005751.4	c.2609G>A	p.(Cys870Tyr)	3		UA	23	1	1	rs187255726	51/271722=0	0/23702=0	0/34022=0	0/9926=0	50/18742=0.003	0/25658=0	0/123404=0	0/29900=0	1/6368=0	-3	-2	-3	deleterious	0	probably damaging	0.998	194	24.8
70	AR	AKAP9	NM_005751.4	c.3055T>G	p.(Leu1019Val)	3		WPW	356	3	3	rs769686940	4/245390=0	0/15284=0	0/33524=0	0/9812=0	0/17234=0	0/22252=0	4/111156=0	0/30666=0	0/5462=0	1	1	1	tolerated	0.15	benign	0.365	32	11.23
71	AR	AKAP9	NM_005751.4	c.3793G>A	p.(Glu1265Lys)	3		UA	213	2	2		11/253908=0	1/22176=0	0/33362=0	0/9438=0	0/18406=0	0/24556=0	10/111498=0	0/28458=0	0/6014=0	1	1	1	deleterious	0.04	benign	0.31	56	23.4	43
72	AR	AKAP9	NM_005751.4	c.4082A>G	p.(Tyr1361Cys)	3		UA	24	1	1	rs760043880	3/277166=0	0/24040=0	0/34416=0	0/10150=0	0/18870=0	3/25776=0	0/126672=0	0/30780=0	0/6462=0	-3	-2	-3	deleterious	0	probably damaging	0.988	194	23.0
73	AR	AKAP9	NM_005751.4	c.4765G>A	p.(Asp1589Asn)	3		(A)SCD	25	1	1	rs371957004	2/245996=0	0/15302=0	0/33532=0	0/9844=0	0/17244=0	1/22292=0	1/111532=0	0/30776=0	0/5474=0	2	1	1	deleterious	0.04	probably damaging	0.998	23	29.8
74	AR	AKAP9	NM_005751.4	c.5468A>T	p.(Gln1823Leu)	3		UA	302	3	3	rs147772200	9/276940=0	0/24032=0	0/34408=0	0/10144=0	0/18848=0	0/25788=0	9/126496=0	0/30774=0	0/6450=0	-2	-2	-3	deleterious	0	benign	0.109	113	22.1
75	AR	AKAP9	NM_005751.4	c.5767G>A	p.(Val1923Ile)	3		BRS	134	4	2	rs755463664	12/276486=0	1/24010=0	1/34372=0	0/10132=0	0/18858=0	0/25782=0	6/126120=0	4/30770=0	0/6442=0	3	3	3	tolerated	0.28	benign	0.017	29	15.60
76	AR	AKAP9	NM_005751.4	c.6176A>G	p.(Glu2059Gly)	3		UA	278	2	2	rs73226383	160/275288=0.001	8/23938=0	6/34246=0	1/10092=0	0/18784=0	4/25758=0	140/125624=0.001	0/30436=0	1/6410=0	-2	-2	-3	deleterious	0	probably_damaging	0.996	98	29.1
77	AR	AKAP9	NM_005751.4	c.6176A>G	p.(Glu2059Gly)	3		UA	313	3	3	rs73226383	160/275288=0.001	8/23938=0	6/34246=0	1/10092=0	0/18784=0	4/25758=0	140/125624=0.001	0/30436=0	1/6410=0	-2	-2	-3	deleterious	0	probably_damaging	0.996	98	29.1
78	AR	AKAP9	NM_005651.4	c.6176A>G	p.(Glu2059Gly)	3		UA	321	3	3	rs73226383	160/275288=0.001	8/23938=0	6/34246=0	1/10092=0	0/18784=0	4/25758=0	140/125624=0.001	0/30436=0	1/6410=0	-2	-2	-3	deleterious	0	probably_damaging	0.996	98	29.1
79	AR	AKAP9	NM_005751.4	c.6176A>G	p.(Glu2059Gly)	3		SSS	413	2	2	rs73226383	160/275288=0.001	8/23938=0	6/34246=0	1/10092=0	0/18784=0	4/25758=0	140/125624=0.001	0/30436=0	1/6410=0	-2	-2	-3	deleterious	0	probably_damaging	0.996	98	29.1
80	AR	AKAP9	NM_005751.4	c.8468A>G	p.(Gln2823Arg)	3		UA	28	1	1	rs376528503	12/275584=0	0/23984=0	4/34208=0	0/10060=0	0/18806=0	0/25724=0	7/126024=0	0/30342=0	1/6436=0	1	1	1	deleterious	0.03	benign	0.007	43	22.7
81	AR	AKAP9	NM_005751.4	c.8695G>A	p.(glu2899Lys)	3		BRS	368	3	3		2/276732=0	0/23984=0	0/34386=0	0/10142=0	0/18856=0	0/25740=0	2/126450=0	0/30716=0	0/6458=0	1	1	1	tolerated	0.06	benign	0.234	56	20.5
82	CM	ALPK3	NM_020778.4	c.2634_2637del	p.(Gly879Argfs*74)	4		HCM	751	4	1														NA	NA	NA	NA	NA	23.1
83	CM	ALPK3	NM_020778.4	c.3274C>T	p.(Gln1092*)	4		HCM	752	6	1											-5	-4	-6	NA	NA	NA	NA	NA	35
84	CM	ALPK3	NM_020778.4	c.3495C>G	p.(Tyr1165*)	4		HCM	754	1	1											-5	-4	-6	NA	NA	NA	NA	NA	39
85	CM	ALPK3	NM_020778.4	c.4736-1G>A	p.?	4		HCM	1524	4	1	rs762110595	4/273120=0	0/24000=0	0/33928=0	0/9782=0	0/18824=0	0/25536=0	4/124602=0	0/30106=0	0/6342=0				NA	NA	NA	NA	NA	34
86	CM	ALPK3	NM_020778.4	c.4997del	p.(Asn1666Thrfs*14)	4		ARVC	761	1	1		1/245986=0	0/15304=0	0/33566=0	0/9834=0	0/17248=0	0/22288=0	1/111490=0	0/30774=0	0/5482=0				NA	NA	NA	NA	NA	33
87	CM	ALPK3	NM_020778.4	c.4997del	p.(Asn1666Thrfs*14)	4		HCM	762	2	1		1/245986=0	0/15304=0	0/33566=0	0/9834=0	0/17248=0	0/22288=0	1/111490=0	0/30774=0	0/5482=0				NA	NA	NA	NA	NA	33
88	CM	ALPK3	NM_020778.4	c.5029C>T	p.(Gln1677*)	4		HCM	763	1	1											-5	-4	-6	NA	NA	NA	NA	NA	49
89	CM	ALPK3	NM_020778.4	c.661del	p.(Ala221Argfs*90)	4		HCM	768	2	1														NA	NA	NA	NA	NA	0.084
90	CM	ALPK3	NM_020778.4	c.(4423+1_4424-1)_(*1_?)dup	p.?	3		HCM	1514	3	1
91	CM	ALPK3	NM_020778.4	c.1259C>T	p.(Pro420Leu)	3		HCM	746	1	1	rs373555781	32/275862=0	2/23880=0	2/34390=0	0/10118=0	0/18844=0	1/25738=0	27/125682=0	0/30774=0	0/6436=0	-3	-3	-3	deleterious	0	probably_damaging	0.982	98	26.1
92	CM	ALPK3	NM_020778.4	c.1318C>T	p.(Pro440Ser)	3		UCM	1530	2	1	rs138094037	11/274924=0	10/23870=0	1/34148=0	0/10052=0	0/18762=0	0/25652=0	0/125336=0	0/30704=0	0/6400=0	-1	-1	-1	tolerated	0.37	benign	0.028	74	7850
93	CM	ALPK3	NM_020778.4	c.1544G>A	p.(Gly515Glu)	3		UCM	1203	3	2	rs148547083	77/276492=0	3/23962=0	2/34414=0	0/10132=0	0/18858=0	0/25436=0	64/126454=0.001	1/30776=0	7/6460=0.001	-2	-2	-3	deleterious	0.01	possibly_damaging	0.546	98	24.3
94	CM	ALPK3	NM_020778.4	c.1826_1831dup	p.(Pro609_Gly610dup)	3		HCM	747	2	1	rs776620295													NA	NA	NA	NA	NA	11.95
95	CM	ALPK3	NM_020778.4	c.2195G>A	p.(Arg732Gln)	3		HCM	748	4	1	rs150733634	15/275688=0	15/23944=0.001	0/34228=0	0/10050=0	0/18818=0	0/25692=0	0/125842=0	0/30678=0	0/6436=0	1	1	1	deleterious	0	probably_damaging	0.991	43	25.1
96	CM	ALPK3	NM_020778.4	c.2259+6T>G	p.?	3		HCM	1011	2	2	rs747301491	6/232942=0	2/23226=0	0/25958=0	0/6264=0	0/17328=0	0/22442=0	4/110560=0	0/21912=0	0/5252=0				NA	NA	NA	NA	NA	15.77
97	CM	ALPK3	NM_020778.4	c.2291C>G	p.(Thr764Ser)	3		NCCM	749	1	1	rs772032580										2	1	1	tolerated	0.1	benign	0.006	58	8478
98	CM	ALPK3	NM_020778.4	c.2434G>A	p.(Val812Met)	3		DCM	750	1	1	rs121913010	10/277052=0	0/24010=0	3/34420=0	0/10152=0	0/18862=0	0/25794=0	5/126580=0	1/30782=0	1/6452=0	0	0	-1	deleterious	0	probably_damaging	1	56	26.7
99	CM	ALPK3	NM_020778.4	c.256C>A	p.(Leu86Ile)	3		DCM	1529	3	3											2	2	1	deleterious	0	benign	0.001	5	7337
100	CM	ALPK3	NM_020778.4	c.2588T>A	p.(Met863Lys)	3		DCM	948	2	2	rs150227073	33/277044=0	33/23992=0.001	0/34414=0	0/10150=0	0/18868=0	0/25754=0	0/126622=0	0/30782=0	0/6462=0	-1	-1	-2	deleterious	0	benign	0.003	95	12.28
101	CM	ALPK3	NM_020778.4	c.2765T>C	p.(Met922Thr)	3		HCM	1007	3	3		1/245970=0	0/15298=0	0/33572=0	0/9812=0	0/17248=0	0/22268=0	1/111568=0	0/30720=0	0/5484=0	-1	-1	-1	tolerated	0.94	benign	0	81	0.685
102	CM	ALPK3	NM_020778.4	c.3236C>G	p.(Ala1079Gly)	3		HCM	752	6	2											0	0	0	tolerated	0.25	benign	0.01	60	0.329
103	CM	ALPK3	NM_020778.4	c.3280G>A	p.(Gly1094Arg)	3		HCM	1284	3	2	rs145983200	54/276594=0	2/23972=0	1/34410=0	0/10140=0	0/18850=0	1/25700=0	46/126292=0	4/30780=0	0/6450=0	-2	-2	-3	tolerated	0.55	benign	0	125	0.266
104	CM	ALPK3	NM_020778.4	c.3307G>A	p.(Glu1103Lys)	3		HCM	753	1	1	rs199572606	24/245234=0	0/15246=0	22/33568=0.001	0/9812=0	0/17230=0	0/22220=0	1/110930=0	0/30762=0	1/5466=0	1	1	1	tolerated	0.47	benign	0.026	56	13.02
105	CM	ALPK3	NM_020778.4	c.3623T>G	p.(Leu1208Arg)	3		HCM	1064	3	2											-2	-2	-3	deleterious	0	probably_damaging	0.997	102	27.2
106	CM	ALPK3	NM_020778.4	c.3644G>A	p.(Arg1215His)	3		DCM	755	1	1	rs201993684	39/275888=0	0/23922=0	8/34372=0	8/10080=0.001	1/18834=0	0/25706=0	12/125806=0	9/30726=0	1/6442=0	0	0	0	deleterious	0	probably_damaging	0.962	29	26.7
107	CM	ALPK3	NM_020778.4	c.368C>T	p.(Pro123Leu)	3		DCM	804	3	2		1/30846=0	0/8690=0	0/830=0	0/302=0	0/1620=0	0/3466=0	1/14960=0	0/0=0	0/978=0	-3	-3	-3	deleterious	0.01	benign	0.001	98	7725
108	CM	ALPK3	NM_020778.4	c.3730G>A	p.(Gly1244Ser)	3		HCM	1273	3	3	rs561031407	38/272804=0	1/23400=0	0/34274=0	0/9980=0	32/18734=0.002	0/25442=0	3/123974=0	2/30628=0	0/6372=0	0	0	-1	deleterious	0.04	benign	0.172	56	22.8
109	CM	ALPK3	NM_020778.4	c.3908G>A	p.(Gly1303Asp)	3		HCM	1004	2	2	rs201049076	50/226732=0	4/21524=0	8/27856=0	0/6358=0	0/17180=0	0/22110=0	35/104558=0	0/22036=0	3/5110=0.001	-1	-1	-2	tolerated	0.22	benign	0.019	94	11.95
110	CM	ALPK3	NM_020778.4	c.4091G>C	p.(Gly1364Ala)	3		ARVC	1588	1	1	rs752749949	17/269654=0	0/23158=0	2/33964=0	0/9994=0	0/18442=0	0/24970=0	14/122716=0	0/30132=0	1/6278=0	0	0	0	deleterious	0	probably_damaging	0.997	60	26.9
111	CM	ALPK3	NM_020778.4	c.4161_4166dup	p.(Arg1388_Glu1389dup)	3		HCM	756	2	1														NA	NA	NA	NA	NA	12.75
112	CM	ALPK3	NM_020778.4	c.4245C>T	p.(Gly2102Val)	3		HCM	757	2	1		1/182584=0	1/16802=0	0/25094=0	0/8578=0	0/12388=0	0/15672=0	0/75914=0	0/23278=0	0/4858=0				NA	NA	NA	NA	NA	7956
113	CM	ALPK3	NM_020778.4	c.4268C>T	p.(Ala1423Val)	3		UCM	1593	2	1	rs557058818	25/186392=0	1/17306=0	4/25358=0	0/8624=0	1/13014=0	0/14762=0	17/78826=0	0/23554=0	2/4948=0	0	0	0	tolerated	0.22	benign	0.101	64	11.43
114	CM	ALPK3	NM_020778.4	c.436_440dup	p.(Glu148Glnfs*8)	3		HCM	758	4	1														NA	NA	NA	NA	NA	20.8
115	CM	ALPK3	NM_020778.4	c.4438C>T	p.(Arg1480Trp)	3		DCM	1405	2	2	rs201413329	59/277128=0	0/24010=0	4/34416=0	0/10150=0	0/18870=0	0/25792=0	52/126656=0	1/30774=0	2/6460=0	-2	-3	-4	deleterious	0	probably_damaging	1	101	34
116	CM	ALPK3	NM_020778.4	c.4592C>T	p.(Ala355Thr)	3		HCM	1059	2	2	rs140665587	12/243682=0	0/15160=0	0/33530=0	0/9796=0	1/17206=0	0/21572=0	10/110244=0	1/30744=0	0/5430=0	0	0	0	tolerated	0.41	benign	0.06	64	22.6
117	CM	ALPK3	NM_020778.4	c.462G>T	p.(=)	3		UCM	759	2	1														NA	NA	NA	NA	NA	13.95
118	CM	ALPK3	NM_020778.4	c.4678G>A	p.(Asp1560Asn)	3		UCM	760	1	1	rs780843840	26/246006=0	0/15294=0	0/33580=0	0/9846=0	0/17240=0	0/22150=0	1/111632=0	25/30780=0.001	0/5484=0	2	1	1	deleterious	0.01	possibly_damaging	0.618	23	26.5
119	CM	ALPK3	NM_020778.4	c.4790C>G	p.(Ser1597Cys)	3		HCM	1206	3	2	rs192472249	11/246206=0	0/15304=0	0/33580=0	0/9844=0	11/17248=0.001	0/22298=0	0/111672=0	0/30778=0	0/5482=0	-1	-1	-2	deleterious	0.03	benign	0.293	112	24.5
120	CM	ALPK3	NM_020778.4.	c.5119T>C	p.(Tyr1707His)	3		DCM	848	3	3	rs760745513	1/246168=0	0/15302=0	0/33582=0	0/9848=0	0/17248=0	0/22298=0	0/111630=0	1/30780=0	0/5480=0	2	2	2	deleterious	0.04	possibly_damaging	0.85	83	26.5
121	CM	ALPK3	NM_020778.4	c.524C>G	p.(Ala175Gly)	3		DCM	764	1	1	rs1015886974										0	0	0	tolerated	0.4	benign	0.001	60	10.83
122	CM	ALPK3	NM_020778.4	c.524C>G	p.(Ala175Gly)	3		DCM	1575	2	2	rs1015886974										0	0	0	tolerated	0.4	benign	0.001	60	10.83
123	CM	ALPK3	NM_020778.4	c.5261A>C	p.(Lys1754Thr)	3		HCM	765	1	1		1/246272=0	0/15304=0	0/33582=0	0/9850=0	0/17248=0	0/22300=0	1/111720=0	0/30782=0	0/5486=0	-1	-1	-1	deleterious	0	probably_damaging	0.999	78	29.1
124	CM	ALPK3	NM_020778.4	c.5633C>G	p.(Ala1878Gly)	3		HCM	766	1	1	rs150250443	18/276842=0	17/24024=0.001	1/34414=0	0/10146=0	0/18870=0	0/25638=0	0/126504=0	0/30780=0	0/6466=0	0	0	0	deleterious	0.03	possibly_damaging	0.615	60	22.8
125	CM	ALPK3	NM_020778.4	c.5714G>A	p.(Gly1905Asp)	3		HCM	767	2	1		2/30946=0	2/8724=0	0/838=0	0/302=0	0/1622=0	0/3494=0	0/14984=0	0/0=0	0/982=0	-1	-1	-2	deleterious	0	possibly_damaging	0.808	94	25.2
126	CM	ALPK3	NM_020778.4	c.668G>T	p.(Gly223Val)	3		ARVC	769	1	1											-3	-3	-4	tolerated	0.09	benign	0.346	109	14.90
127	CM	ALPK3	NM_020778.4	c.704G>A	p.(Ser235Asn)	3		DCM	1234	3	2		2/124488=0	0/10262=0	0/21344=0	0/7144=0	0/6180=0	0/8666=0	2/46536=0	0/20644=0	0/3712=0	1	1	0	deleterious	0.01	benign	0.305	46	23.7
128	AR	ANK2	NM_001148.4	c.10150C>T	p.(Pro3384Ser)	3		UA	33	1	1		2/245694=0	0/15300=0	1/33570=0	0/9834=0	0/17234=0	0/22298=0	1/111210=0	0/30780=0	0/5468=0	-1	-1	-1	tolerated	0.12	benign	0.161	74	1.76
129	AR	ANK2	NM_001148.4	c.10702C>T	p.(Arg3568Trp)	3		UA	209	2	1	rs72556376	46/275848=0	2/23972=0	15/34234=0	0/10128=0	0/18738=0	0/25718=0	23/125992=0	2/30650=0	4/6416=0.001	-2	-3	-4	deleterious	0.01	possibly_damaging	0.901	101	27.7	22.5
130	AR	ANK2	NM_001148.4	c.1093T>C	p.(Tyr365His)	3		CPVT	207	1	1											2	2	2	tolerated	0.05	possibly_damaging	0.754	83	25.1	22.1
131	AR	ANK2	NM_001148.4	c.11027G>C	p.(Ser3676Thr)	3		BRS	199	1	1	rs886059017	2/245286=0	0/15286=0	0/33492=0	0/9838=0	0/17170=0	0/22158=0	2/111120=0	0/30770=0	0/5452=0	2	1	1	tolerated	0.06	probably_damaging	0.993	58	24.6
132	AR	ANK2	NM_001148.4	c.11539G>A	p.(Val3847Ile)	3		UA	200	1	1		2/245410=0	0/15260=0	0/33552=0	0/9816=0	0/17212=0	0/22288=0	2/111040=0	0/30774=0	0/5468=0	3	3	3	deleterious	0.05	probably_damaging	0.996	29	23.4
133	AR	ANK2	NM_001148.4	c.1279A>G	p.(Ile427Val)	3		UA	201	2	1	rs750168379	4/245768=0	0/15298=0	0/33544=0	0/9836=0	0/17234=0	0/22300=0	4/111294=0	0/30782=0	0/5480=0	3	3	3	tolerated	0.72	benign	0.031	29	15.58
134	AR	ANK2	NM_001148.4	c.1397C>T	p.(Thr466Met)	3		BRS	198	1	1	rs786205722	8/167964=0	0/9546=0	0/25494=0	0/8442=0	0/12114=0	0/16186=0	7/68304=0	1/23752=0	0/4126=0	-1	-1	-1	deleterious	0	probably_damaging	0.997	81	29.5
135	AR	ANK2	NM_001148.4	c.2249A>G	p.(Gln750Arg)	3		UA	9	2	2	rs371787039	76/277170=0	5/24034=0	1/34418=0	0/10150=0	54/18866=0.003	0/25770=0	1/126688=0	14/30780=0	1/6464=0	1	1	1	deleterious	0.03	possibly damaging	0.696	43	25.5
136	AR	ANK2	NM_001127493.1	c.2249A>G	p.(Gln750Arg)	3		UA	194	2	1	rs371787039	76/277170=0	5/24034=0	1/34418=0	0/10150=0	54/18866=0.003	0/25770=0	1/126688=0	14/30780=0	1/6464=0	1	1	1	deleterious	0.01	possibly_damaging	0.572	43	26.4
137	AR	ANK2	NM_001148.4	c.4373A>G	p.(Glu1458Gly)	3		UA	213	2	1	rs72544141	143/276786=0.001	4/24024=0	38/34336=0.001	0/10146=0	0/18842=0	0/25788=0	96/126426=0.001	0/30766=0	5/6458=0.001	-2	-2	-3	deleterious	0.01	benign	0.355	98	26.2	NA
138	AR	ANK2	NM_001148.4	c.6628G>A	p.(Val2210Ile)	3		UA	211	2	1	rs370296970										3	3	3	tolerated	0.53	benign	0.003	29	3986	28.1
139	AR	ANK2	NM_001148.4	c.6836A>G	p.(His2279Arg)	3		UA	210	1	1											0	0	0	tolerated	0.56	benign	0	29	4331	26.9
140	AR	ANK2	NM_001148.5	c.6878G>A	p.(Gly2293Asp)	3		UA	214	1	1	rs776469600	1/244094=0	0/15044=0	0/33520=0	0/9770=0	0/17172=0	0/22254=0	0/110148=0	1/30748=0	0/5438=0	-1	-1	-2	tolerated	0.39	possibly_damaging	0.884	94	14.36	NA
141	AR	ANK2	NM_001148.4	c.7136C>A	p.(Thr2379Lys)	3		UA	197	1	1	rs753351853	9/276390=0	0/24030=0	1/34390=0	0/10124=0	0/18818=0	0/25792=0	8/126008=0	0/30780=0	0/6448=0	-1	-1	-1	tolerated	0.12	benign	0.003	78	9171
142	AR	ANK2	NM_001148.4	c.7136C>T	p.(Thr2379Ile)	3		UA	208	2	1	rs753351853										-1	-1	-1	deleterious	0.01	benign	0.077	89	12.67	32
143	AR	ANK2	NM_001148.4	c.7168A>C	p.(Lys2390Gln)	3		LQTS	205	1	1	rs151218210	17/276322=0	0/24032=0	0/34392=0	0/10120=0	0/18816=0	0/25780=0	17/125964=0	0/30774=0	0/6444=0	1	1	1	tolerated	0.07	benign	0.027	53	15.39
144	AR	ANK2	NM_001148.4	c.7168A>C	p.(Lys2390Gln)	3		UA	196	1	1	rs151218210	17/276322=0	0/24032=0	0/34392=0	0/10120=0	0/18816=0	0/25780=0	17/125964=0	0/30774=0	0/6444=0	1	1	1	tolerated	0.07	benign	0.027	53	15.39
145	AR	ANK2	NM_001148.4	c.7979T>A	p.(Val2660Glu)	3		CPVT	212	1	1											-3	-2	-3	tolerated	0.05	benign	0.023	121	12.61	25.7
146	AR	ANK2	NM_001148.4	c.8002C>A	p.(Pro2668Thr)	3		BRS	195	2	1											-1	-1	-2	tolerated	0.11	probably_damaging	0.999	38	24.2
147	AR	ANK2	NM_001148.4	c.8330G>T	p.(Cys2777Phe)	3		UA	202	1	1	rs769322588	7/244452=0	0/15262=0	0/33538=0	0/9802=0	0/17210=0	0/22282=0	6/110142=0	0/30770=0	1/5446=0	-2	-2	-3	deleterious	0.04	benign	0.105	205	17.32
148	AR	ANK2	NM_001148.4	c.8372C>T	p.(Ser2791Leu)	3		UA	204	1	1		4/245076=0	0/15296=0	0/33550=0	0/9818=0	0/17216=0	0/22294=0	4/110660=0	0/30782=0	0/5460=0	-3	-2	-3	tolerated	0.37	benign	0	145	11.07
149	AR	ANK2	NM_001148.4	c.8867C>G	p.(Ser2956Cys)	3		UA	203	1	1	rs754378659	5/245738=0	0/15296=0	0/33572=0	0/9836=0	0/17238=0	0/22292=0	4/111250=0	1/30780=0	0/5474=0	-1	-1	-2	deleterious	0.04	probably_damaging	0.912	112	23.5
150	AR	ANK2	NM_001148.4	c.9679A>C	p.(Thr3227Pro)	3		LQTS	206	1	1	rs140604600	33/276184=0	0/24020=0	0/34366=0	0/10088=0	0/18836=0	0/25690=0	31/126040=0	2/30714=0	0/6430=0	-1	-1	-2	tolerated	0.13	benign	0.347	38	1665	23.7
151	AR	ANK2	NM_001148.4	c.10881T>G	p.(His3627Gln)	3		(A)SCD	34	1	1	rs148405740	64/276942=0	1/24026=0	26/34356=0.001	3/10146=0	0/18846=0	0/25764=0	29/126572=0	1/30778=0	4/6454=0.001	1	0	1	tolerated	0.1	benign	0.135	24	0.471
152	AR	ANK2	NM_001148.4	c.10881T>G	p.(His3627Gln)	3		UA	35	1	1	rs148405740	64/276942=0	1/24026=0	26/34356=0.001	3/10146=0	0/18846=0	0/25764=0	29/126572=0	1/30778=0	4/6454=0.001	1	0	1	tolerated	0.1	benign	0.135	24	0.471
153	AR	ANK2	NM_001148.4	c.11641A>G	p.(Thr3881Ala)	3		Other indication	36	1	1	rs373688313	7/276640=0	7/24026=0	0/34408=0	0/10132=0	0/18858=0	0/25794=0	0/126180=0	0/30782=0	0/6460=0	0	0	0	tolerated	0.1	benign	0.003	58	17.22
154	AR	ANK2	NM_001148.4	c.2144C>T	p.(Thr715Ile)	3		LQTS	397	2	2	rs199681788	28/276990=0	2/24024=0	3/34398=0	0/10150=0	0/18862=0	0/25736=0	23/126586=0	0/30776=0	0/6458=0	-1	-1	-1	tolerated	0.17	benign	0.03	89	15.08
155	AR	ANK2	NM_001148.4	c.2869G>A	p.(Val957Met)	3		UA	312	2	2	rs756861229	12/276208=0	0/23960=0	3/34352=0	0/10128=0	0/18820=0	1/25768=0	2/126204=0	4/30536=0	2/6440=0	1	1	1	deleterious	0	probably_damaging	0.996	21	26.0
156	AR	ANK2	NM_001148.4	c.3460G>A	p.(Val1154Met)	3		UA	114	2	2											1	1	1	deleterious	0	probably_damaging	1	21	27.8	32
157	AR	ANK2	NM_001148.4	c.5220C>A	p.(Asp1740Glu)	3		UA	208	2	2											2	2	1	tolerated	0.76	benign	0.013	0	0.403	26.8
158	AR	ANK2	NM_001148.4	c.5749T>C	p.(Ser1917Ala)	3		UA	201	2	2											-1	-1	-1	tolerated	0.22	benign	0.003	74	13.84
159	AR	ANK2	NM_001148.4	c.6170C>T	p.(Pro2057Leu)	3		UA	127	1	1	rs146531225	9/276490=0	3/24008=0	4/34410=0	0/10116=0	1/18842=0	0/25770=0	1/126144=0	0/30758=0	0/6442=0	-3	-3	-3	tolerated	0.48	benign	0	98	0.058
160	AR	ANK2	NM_001148.4	c.88728G>A	p.(Val2910Met)	3		CPVT	301	3	3	rs748400535	6/245724=0	0/15298=0	0/33572=0	0/9830=0	1/17236=0	0/22274=0	3/111258=0	2/30782=0	0/5474=0	1	1	1	deleterious	0.04	benign	0.251	21	13.68
161	AR	ANK2	NM_001148.4	c.949C>A	p.(Leu317Ile)	3		LQTS	266	2	2											2	2	1	tolerated	0.25	possibly_damaging	0.748	5	24.1
162	AR	ANK2	NM_001148.4	c.961C>T	p.(Arg321Trp)	3		UA	32	1	1	rs753032598	14/276672=0	5/23996=0	0/34386=0	0/10128=0	0/18852=0	0/25782=0	9/126374=0	0/30702=0	0/6452=0	-2	-3	-4	deleterious	0	probably damaging	1	101	34
163	CM	ANKRD1	NM_014391.2	c.154C>G	p.(Pro52Ala)	3		HCM	1539	1	1	rs397517248	20/277038=0	0/24032=0	8/34408=0	0/10144=0	0/18866=0	0/25792=0	4/126550=0	8/30782=0	0/6464=0	-1	-1	-1	tolerated	0.91	benign	0	27	8734
164	CM	ANKRD1	NM_014391.2	c.222dup	p.(Leu75Thrfs*8)	3		DCM	770	1	1	rs776659587	29/268886=0	4/23702=0	0/33888=0	0/10020=0	1/18248=0	0/23904=0	24/122776=0	0/30052=0	0/6296=0				NA	NA	NA	NA	NA	34
165	CM	ANKRD1	NM_014391.2	c.222dup	p.(Leu75Thrfs*8)	3		DCM	771	2	1	rs776659587	29/268886=0	4/23702=0	0/33888=0	0/10020=0	1/18248=0	0/23904=0	24/122776=0	0/30052=0	0/6296=0				NA	NA	NA	NA	NA	34
166	CM	ANKRD1	NM_014391.2	c.222dup	p.(Leu75Thrfs*8)	3		HCM	772	1	1	rs776659587	29/268886=0	4/23702=0	0/33888=0	0/10020=0	1/18248=0	0/23904=0	24/122776=0	0/30052=0	0/6296=0				NA	NA	NA	NA	NA	34
167	CM	ANKRD1	NM_014391.2	c.28-1G>A	p.?	3		DCM	473	2	1		1/245398=0	0/15302=0	0/33566=0	0/9822=0	0/17238=0	0/22278=0	1/110968=0	0/30754=0	0/5470=0	NA	NA	NA	NA	NA		NA	NA	NA
168	CM	ANKRD1	NM_014391.2	c.313C>T	p.(Pro105Ser)	3		UCM	1580	1	1	rs148189486	45/275562=0	1/23800=0	2/34362=0	0/10124=0	0/18790=0	1/25428=0	40/125982=0	0/30680=0	1/6396=0	-1	-1	-1	tolerated	0.05	benign	0.297	74	19.14
169	CM	ANKRD1	NM_014391.2	c.481T>C	p.(Cys161Arg)	3		HCM	441	2	2											-3	-3	-4	deleterious	0.01		probably damaging	0.979	180
170	CM	ANKRD1	NM_014391.2	c.553-6dup	p.?	3		UCM	773	2	1	rs749531136	1/245660=0	0/15286=0	0/33562=0	0/9828=0	0/17200=0	0/22248=0	1/111306=0	0/30762=0	0/5468=0				NA	NA	NA	NA	NA	6825
171	CM	ANKRD1	NM_014391.2	c.649A>G	p.(Cys217Glu)	3		HCM	774	2	1		1/246154=0	0/15304=0	0/33578=0	0/9846=0	1/17234=0	0/22296=0	0/111636=0	0/30780=0	0/5480=0	1	1	1	deleterious	0	possibly_damaging	0.838	56	32
172	CM	ANKRD1	NM_014391.2	c.656T>A	p.(Leu219His)	3		DCM	779	6	4	rs796186723										-2	-3	-3	tolerated	0.55	benign	0.022	99	22.7
173	CM	ANKRD1	NM_014391.2	c.710A>G	P.(HIS237Arg)	3		HCM	1009	2	2	rs145326465	4/245790=0	0/15300=0	1/33576=0	0/9828=0	0/17220=0	0/22296=0	3/111306=0	0/30782=0	0/5482=0	0	0	0	deleterious	0.02	probably_damaging	0.956	29	26.7
174	CM	ANKRD1	NM_014391.2	c.818T>C	p.(Met273Thr)	3		DCM	421	3	1	rs183061595	33/276812=0	25/24028=0.001	4/34410=0	0/10136=0	0/18838=0	0/25776=0	1/126378=0	1/30782=0	2/6464=0	-1	-1	-1	tolerated	0.07		benign	0.003	81
175	CM	ANKRD1	NM_014391.2	c.922_925del	p.(Glu308Thrfs*8)	3		ARVC	470	2	2											NA	NA	NA	NA	NA		NA	NA	NA	27.9
176	AR	ASPH	NM_020164.4	c.269A>G	p.(Lys90Arg)	3		UA	215	2	1	rs746601152	5/271412=0	0/23750=0	0/32852=0	0/9990=0	2/18480=0	0/25662=0	3/124794=0	0/29602=0	0/6282=0	3	2	2	deleterious	0.01	probably_damaging	0.999	26	29.1	7.597
177	AR	ASPH	NM_020164.4	c.215A>G	p.(Lys2Arg)	3		LQTS	263	3	2		1/233770=0	0/14642=0	0/30336=0	0/9542=0	0/16396=0	0/22026=0	0/107542=0	0/28180=0	1/5106=0	3	2	2	tolerated	0.08	possibly_damaging	0.631	26	24.4
178	CM	BAG3	NM_004281.3	c.72del	p.(Gly25Aspfs*186)	5		DCM	779	6	1	rs747846089													NA	NA	NA	NA	NA	32
179	CM	BAG3	NM_004281.3	c.211C>T	p.(Arg71Trp)	4		UCM	434	2	2	rs387906874	42/277020=0	2/24028=0	1/34420=0	0/10152=0	3/18870=0	18/25776=0.001	17/126528=0	0/30782=0	1/6464=0	-2	-3	-4	deleterious	0.02		possibly damaging	0.549	101	30
180	CM	BAG3	NM_004281.3	c.1099C>A	p.(Pro367Thr)	3		DCM	775	2	1	rs778793737										-1	-1	-2	deleterious	0.01	possibly_damaging	0.554	38	20.8
181	CM	BAG3	NM_004281.3	c.1232_1234del	p.(Gly411del)	3		NCCM	809	2	2	rs761727804	7/30978=0	7/8736=0.001	0/838=0	0/302=0	0/1622=0	0/3492=0	0/15006=0	0/0=0	0/982=0				NA	NA	NA	NA	NA	15.66
182	CM	BAG3	NM_004281.3	c.1625C>T	p.(Ala542Val)	3		DCM	776	2	1	rs770920565	13/277070=0	1/24016=0	4/34414=0	0/10140=0	0/18866=0	0/25784=0	6/126612=0	0/30774=0	2/6464=0	0	0	0	tolerated	0.13	benign	0.013	64	4754
183	CM	BAG3	NM_004281.3	c.212G>T	p.(Arg71Leu)	3		HCM	1362	2	2	rs35434411	42/277004=0	1/24030=0	16/34418=0	0/10152=0	1/18868=0	0/25772=0	22/126516=0	0/30782=0	2/6466=0	-2	-2	-3	tolerated	0.1	benign	0.103	102	18.31
184	CM	BAG3	NM_004281.3	c.289C>A	p.(Pro97Thr)	3		NCCM	472	2	2	rs747274078										-1	-1	-2	deleterious	0		probably damaging	0.999	38	20.1
185	CM	BAG3	NM_004281.3	c.400T>A	p.(Ser134Thr)	3		HCM	422	3	1	rs375257731	33/276944=0	0/23980=0	0/34414=0	0/10142=0	22/18864=0.001	0/25780=0	0/126528=0	11/30782=0	0/6454=0	2	1	1	tolerated	0.23		benign	0.036	58	0.018
186	CM	BAG3	NM_004281.3	c.416G>A	p.(Arg139Gln)	3		UCM	777	1	1	rs769913236	3/245744=0	0/15214=0	0/33574=0	0/9834=0	1/17240=0	0/22282=0	1/111344=0	1/30778=0	0/5478=0	1	1	1	tolerated	0.15	possibly_damaging	0.511	43	22.2
187	CM	BAG3	NM_004281.3	c.508C>T	p.(Arg170Trp)	3		HCM	1134	4	2	rs200479768	10/272212=0	3/23310=0	3/34348=0	0/10060=0	0/18796=0	1/25078=0	3/123614=0	0/30612=0	0/6394=0	-2	-3	-4	deleterious	0	possibly_damaging	0.874	101	33
188	CM	BAG3	NM_004281.3	c.653G>A	p.(Arg218Gln)	3		DCM	1553	2	2	rs201638005	69/277004=0	0/24014=0	19/34410=0.001	8/10148=0.001	4/18862=0	0/25792=0	9/126542=0	29/30774=0.001	0/6462=0	1	1	1	deleterious	0.02	benign	0.125	43	24.6
189	CM	BAG3	NM_004281.3	c.67C>T	p.(Pro23Ser)	3		DCM	778	2	1	rs747846089	9/262704=0	0/22040=0	0/31870=0	0/9892=0	1/17692=0	0/25488=0	7/120896=0	1/28802=0	0/6024=0	-1	-1	-1	deleterious	0	probably_damaging	0.989	74	26.0
190	CM	BAG3	NM_004281.3	c.898G>A	p.(Asp300Asn)	3		DCM	614	1	1	rs78439745	219/275742=0.001	3/24014=0	33/34414=0.001	26/10144=0.003	139/18870=0.007	0/25088=0	11/125980=0	2/30780=0	5/6452=0.001	2	1	1	tolerated	0.08		benign	0.03	23	32
191	AR	CACNA1C	NM_000719.6	c.1468G>A	p.(Gly490Arg)	3		BRS	129	1	1	rs121912775	154/259550=0.001	1/22400=0	12/32984=0	105/9858=0.011	1/17868=0	0/23766=0	27/118222=0	4/28332=0	4/6120=0.001	-2	-2	-3	tolerated	0.26	possibly_damaging	0.765	125	25.1
192	AR	CACNA1C	NM_000719.6	c.1558G>A	p.(Ala520Thr)	3		UA	130	1	1	rs755167125	2/215654=0	0/12756=0	0/30666=0	1/9256=0	0/15204=0	1/20256=0	0/95968=0	0/26562=0	0/4986=0	0	0	0	deleterious	0.02	possibly_damaging	0.904	58	24.6
193	AR	CACNA1C	NM_000719.6	c.2974A>T	p.(Asn992Tyr)	3		VF	132	1	1											-2	-2	-3	deleterious	0	probably_damaging	0.999	143	27.0
194	AR	CACNA1C	NM_000719.6	c.3368G>A	p.(Arg1123His)	3		BRS	11	2	1	rs745853358	7/238972=0	0/14628=0	0/32934=0	0/9684=0	0/16846=0	0/21874=0	5/107804=0	2/29834=0	0/5368=0	0	0	0	tolerated	0.37	probably damaging	1	29	23.4
195	AR	CACNA1C	NM_001167625.1	c.5444C>A	p.(Thr1815Asn)	3		UA	8	2	2	rs551355331	33/191242=0	3/17710=0	6/26180=0	0/8686=0	0/13114=0	0/19564=0	21/77484=0	0/23472=0	3/5032=0.001	0	0	0	deleterious	0	benign	0.133	65	4.985
196	AR	CACNA1C	NM_000719.6	c.6272A>G	p.(Asn2091Ser)	3		LQTS	133	2	1	rs201090446	127/260402=0	13/21910=0.001	7/33180=0	0/9792=0	12/17876=0.001	0/24634=0	76/117744=0.001	12/29130=0	7/6136=0.001	1	1	0	tolerated	0.06	probably_damaging	0.994	46	24.2
197	AR	CACNA1C	NM_000719.6	c.911T>C	p.(Ile304Thr)	3		UA	131	1	1	rs201756421	130/275974=0	2/24000=0	2/34264=0	12/10086=0.001	0/18858=0	1/25760=0	110/125874=0.001	0/30694=0	3/6438=0	-1	-1	-1	tolerated	0.48	benign	0.029	89	13.67
198	AR	CACNA1C	NM_000719.6	c.371+1dup	p.?	4		UA	37	1	1											NA	NA	NA	NA	NA	NA	NA	NA	NA
199	AR	CACNA1C	NM_000719.6	c.1342G>A	p.(Asp448Asn)	3		BRS	128	2	1	rs786205746	2/272256=0	0/23368=0	0/34002=0	0/9998=0	0/18662=0	0/25558=0	1/124448=0	0/29840=0	1/6380=0	2	1	1	deleterious	0	probably_damaging	0.998	23	28.0
200	AR	CACNA1C	NM_000719.6	c.2350C>T	p.(Pro784Ser)	3		UA	189	2	2	rs749935207	20/274460=0	0/23782=0	8/34190=0	0/10058=0	0/18716=0	0/25618=0	11/125312=0	0/30378=0	1/6406=0	-1	-1	-1	tolerated	0.11	possibly_damaging	0.877	74	25.3
201	AR	CACNA1C	NM_000719.6	c.3712A>G	p.(Met1238Val)	3		BRS	38	1	1											1	1	1	tolerated	0.16	probably damaging	0.987	21	17.94
202	AR	CACNA1C	NM_000719.6	c.4760C>T	p.(Ala1587Val)	3		BRS	39	1	1	rs751224055	1/184194=0	0/10462=0	0/27110=0	0/8774=0	0/12948=0	0/18156=0	1/77772=0	0/24514=0	0/4458=0	0	0	0	tolerated	0.06	probably damaging	0.969	64	23.1
203	AR	CACNA1C	NM_000719.6	c.5737G>T	p.(Asp1913Tyr)	3		UA	270	3	2	rs181502604										-2	-3	-4	deleterious	0.01	probably_damaging	0.957	160	29.1
204	AR	CACNA1C	NM_000719.6	c.6056C>G	p.(Pro2019Arg)	3		UA	40	1	1	rs762965021										-2	-2	-2	deleterious	0.01	probably damaging	1	103	25.6	25.6
205	AR	CACNA1C	NM_000719.6	c.6116C>G	p.(Ala2039Gly)	3		UA	331	2	2	rs549476254	11/130162=0	1/8622=0	0/21176=0	0/4426=0	0/11308=0	1/9374=0	9/56120=0	0/15948=0	0/3188=0	0	0	0	deleterious	0.01	probably_damaging	0.996	60	34
206	AR	CACNA1D	NM_000720.2	c.3742G>A	p.(Glu1248Lys)	3		UA	12	2	1	rs777098313	3/246254=0	0/15304=0	0/33582=0	0/9850=0	0/17248=0	0/22300=0	3/111702=0	0/30782=0	0/5486=0	1	1	1	tolerated	0.19	possibly damaging	0.807	56	24.9
207	AR	CACNA1D	NM_000720.2	c.5896C>A	p.(Arg1966Ser)	3		UA	10	2	2											-1	-1	-1	tolerated	0.06	possibly damaging	0.807	110	24.5
208	AR	CACNA1D	NM_000720.2	c.6244G>A	p.(Val2082Met)	3		BRS	13	2	1											1	1	1	deleterious	0	probably damaging	1	21	31
209	AR	CACNA1D	NM_000720.3	c.1112A>C	p.(Tyr371Ser)	3		UA	217	2	2	rs577554366	11/276598=0	1/24026=0	0/34406=0	0/10126=0	0/18868=0	0/25794=0	10/126142=0	0/30780=0	0/6456=0	-2	-2	-2	deleterious	0	probably_damaging	1	144	25.1	32
210	AR	CACNA1D	NM_000720.3	c.172G>A	p.(Asp58Asn)	3		UA	245	2	2		7/277128=0	0/24024=0	3/34414=0	0/10150=0	0/18866=0	2/25786=0	2/126646=0	0/30774=0	0/6468=0	2	1	1	tolerated	0.14	benign	0.001	23	22.3	20.5
211	AR	CACNA1D	NM_000720.3	c.1865C>T	p.(Thr622Met)	3		UA	303	2	2	rs765798948	4/246266=0	0/15304=0	0/33582=0	0/9850=0	0/17248=0	0/22300=0	4/111714=0	0/30782=0	0/5486=0	-1	-1	-1	tolerated	0.17	possibly_damaging	0.606	81	24.1
212	AR	CACNA1D	NM_000720.3	c.2129A>G	p.(Asn710Ser)	3		CPVT	384	2	2	rs149676780	37/277008=0	0/24012=0	9/34416=0	0/10148=0	0/18868=0	0/25794=0	7/126524=0	18/30782=0.001	3/6464=0	1	1	0	tolerated	0.36	benign	0.053	46	22.2
213	AR	CACNA1D	NM_000720.3	c.2711A>G	p.(Asn904Ser)	3		LQTS	267	4	3	rs769988052	3/246260=0	0/15304=0	0/33582=0	0/9850=0	0/17248=0	0/22290=0	2/111718=0	1/30782=0	0/5486=0	1	1	0	deleterious	0.02	benign	0.431	46	22.5
214	AR	CACNA1D	NM_000720.2	c.3374C>T	p.(Ala1125Val)	3		LQTS	361	2	2	rs775480398	10/277044=0	1/24030=0	0/34418=0	0/10148=0	0/18870=0	0/25786=0	9/126544=0	0/30782=0	0/6466=0	0	0	0	deleterious	0.05	benign	0.388	64	23.2
215	AR	CACNA1D	NM_000720.3	c.4288_4290del	p.(Glu1430del)	3		UA	144	1	1														NA	NA	NA	NA	NA	22.3
216	AR	CACNA1D	NM_000720.3	c.5186G>A	p.(Arg1792His)	3		CPVT	355	2	2	rs568343967	1/246224=0	1/15304=0	0/33580=0	0/9848=0	0/17248=0	0/22294=0	0/111698=0	0/30768=0	0/5484=0	0	0	0	deleterious	0.01	benign	0.343	29	25.0
217	AR	CACNA1D	NM_000720.3	c.5542C>G	p.(Pro1848Ala)	3		LQTS	133	2	2											-1	-1	-1	tolerated	0.45	benign	0.001	27	9909
218	AR	CACNA1D	NM_000720.3	c.5542C>G	p.(Pro1848Ala)	3		LQTS	232	3	3											-1	-1	-1	tolerated	0.45	benign	0.001	27	9909	NA
219	AR	CACNA1D	NM_000720.3	c.5996G>C	p.(Arg1999Pro)	3		UA	142	1	1	rs143354476	29/276570=0	0/24020=0	0/34412=0	0/10144=0	0/18870=0	6/25790=0	21/126088=0	0/30782=0	2/6464=0	-2	-2	-2	deleterious	0.03	possibly_damaging	0.675	103	26.4
220	AR	CACNA1D	NM_000720.3	c.6433C>T	p.(Arg2145Trp)	3		UA	143	1	1	rs373663753	7/246026=0	1/15296=0	3/33576=0	0/9834=0	0/17244=0	0/22242=0	2/111580=0	1/30772=0	0/5482=0	-2	-3	-4	deleterious	0.03	possibly_damaging	0.514	101	22.7
221	AR	CACNA1D	NM_000720.3	c.1007G>A	p.(Gly336Asp)	3		NCCM	141	1	1		1/246204=0	0/15304=0	1/33580=0	0/9850=0	0/17248=0	0/22300=0	0/111654=0	0/30782=0	0/5486=0	-1	-1	-2	deleterious	0.04	probably_damaging	0.948	94	24.4
222	AR	CACNA1D	NM_000720.3	c.1112A>C	p.(Tyr371Ser)	3		BRS	134	4	1	rs577554366	11/276598=0	1/24026=0	0/34406=0	0/10126=0	0/18868=0	0/25794=0	10/126142=0	0/30780=0	0/6456=0	-2	-2	-2	deleterious	0	probably_damaging	1	144	25.1
223	AR	CACNA1D	NM_000720.3	c.1999A>T	p.(Met667Leu)	3		UA	140	1	1	rs368260280	12/246270=0	0/15304=0	0/33582=0	0/9850=0	0/17248=0	0/22300=0	12/111718=0	0/30782=0	0/5486=0	2	2	2	tolerated	0.11	possibly_damaging	0.761	15	24.0
224	AR	CACNA1D	NM_000720.3	c.2310C>A	p.(=)	3		(A)SCD	138	1	1	rs41276445	76/277230=0	1/24030=0	20/34420=0.001	0/10152=0	0/18870=0	0/25794=0	53/126716=0	0/30782=0	2/6466=0				NA	NA	NA	NA	NA	14.35
225	AR	CACNA1D	NM_000720.3	c.2310C>A	p.(=)	3		VF	139	1	1	rs41276445	76/277230=0	1/24030=0	20/34420=0.001	0/10152=0	0/18870=0	0/25794=0	53/126716=0	0/30782=0	2/6466=0				NA	NA	NA	NA	NA	14.35
226	AR	CACNA1D	NM_000720.3	c.3259G>A	p.(Val1087Ile)	3		BRS	136	1	1	rs532429425	1/246254=0	1/15304=0	0/33582=0	0/9850=0	0/17248=0	0/22300=0	0/111702=0	0/30782=0	0/5486=0	3	3	3	tolerated	0.23	benign	0.086	29	17.94
227	AR	CACNA1D	NM_000720.3	c.6394C>T	p.(Arg2132Cys)	3		UA	137	1	1	rs886044438	1/246164=0	0/15298=0	0/33578=0	0/9846=0	0/17244=0	0/22250=0	0/111684=0	1/30782=0	0/5482=0	-3	-3	-4	tolerated	0.19	benign	0	180	10.33
228	AR	CACNA1D	NM_000720.3	c.5996G>C	p.(Arg1999Pro)	3		UA	135	2	1	rs143354476	29/276570=0	0/24020=0	0/34412=0	0/10144=0	0/18870=0	6/25790=0	21/126088=0	0/30782=0	2/6464=0	-2	-2	-2	deleterious	0.03	possibly_damaging	0.675	103	26.4
229	AR	CACNA2D1	NM_000722.3	c.2237C>T	p.(Thr746Ile)	3		UA	191	1	1	rs779277828										-1	-1	-1	tolerated	0.06	possibly_damaging	0.84	89	25.0
230	AR	CACNA2D1	NM_000722.2	c.2264G>C	p.(Ser755Thr)	3		BRS	188	1	1	rs151327713	233/275628=0.001	0/23978=0	28/34230=0.001	105/10106=0.01	0/18774=0	1/25720=0	82/125672=0.001	13/30748=0	4/6400=0.001	2	1	1	tolerated	0.19	benign	0.175	58	22.6
231	AR	CACNA2D1	NM_000722.3	c.2475A>G	p.(Pro825Pro)	3		CPVT	190	1	1		1/30840=0	0/8724=0	0/832=0	0/302=0	0/1580=0	0/3490=0	1/14934=0	0/0=0	0/978=0				NA	NA	NA	NA	NA	12.47
232	AR	CACNA2D1	NM_000722.2	c.439C>A	p.(Pro147Thr)	3		UA	189	2	1	rs869025369										-1	-1	-2	tolerated	0.53	possibly_damaging	0.736	38	22.9
233	AR	CACNA2D1	NM_000722.2	c.706T>C	p.(Tyr236His)	3		UA	187	1	1											2	2	2	deleterious	0	probably_damaging	0.998	83	27.0
234	AR	CACNA2D1	NM_000722.2	c.226C>T	p.(Arg76Cys)	3		UA	41	1	1	rs759003114	5/276886=0	1/23992=0	0/34394=0	0/10148=0	1/18868=0	0/25712=0	1/126542=0	1/30780=0	1/6450=0	-3	-3	-4	deleterious	0.03	probably damaging	0.998	180	34	32
235	AR	CACNA2D1	NM_000722.2	c.2751A>T	p.(Gln917His)	3		UA	337	2	2	rs145109446	31/275392=0	1/23982=0	0/34214=0	0/10102=0	0/18756=0	1/25714=0	29/125470=0	0/30762=0	0/6392=0	1	0	1	tolerated	0.13	benign	0	24	14.02
236	AR	CACNA2D1	NM_000722.2	c.435A>G	p.(Ile145Met)	3		UA	313	3	2	rs756765026	11/245856=0	0/15298=0	0/33500=0	0/9838=0	0/17230=0	0/22284=0	11/111458=0	0/30782=0	0/5466=0	2	1	1	deleterious	0.03	benign	0.141	10	21.4
237	AR	CACNB2	NM_201596.2	c.1123G>A	p.(Ala375Thr)	3		UA	14	2	1	rs552868927	5/277182=0	1/24034=0	0/34416=0	0/10152=0	0/18854=0	1/25790=0	1/126692=0	1/30782=0	1/6462=0	0	0	0	deleterious	0.01	probably damaging	1	58	33
238	AR	CACNB2	NM_201596.2	c.590C>T	p.(Ser197Phe)	3		LQTS	3	2	2	rs150528041	145/276812=0.001	3/24032=0	4/34408=0	0/10146=0	0/18796=0	0/25724=0	136/126464=0.001	0/30778=0	2/6464=0	-2	-2	-3	deleterious	0.02	possibly damaging	0.919	155	33
239	AR	CACNB2	NM_201596.2	c.1735G>A	p.(Val579Met)	3		BRS	44	1	1	rs544535665	13/246092=0	0/15300=0	0/33580=0	0/9840=0	3/17208=0	0/22298=0	9/111602=0	1/30782=0	0/5482=0	1	1	1	tolerated	0.12	probably damaging	0.988	21	11.28
240	AR	CACNB2	NM_201596.2	c.590C>T	p.(Ser197Phe)	3		UA	42	1	1	rs150528041	145/276812=0.001	3/24032=0	4/34408=0	0/10146=0	0/18796=0	0/25724=0	136/126464=0.001	0/30778=0	2/6464=0	-2	-2	-3	deleterious	0.02	possibly damaging	0.919	155	33	32
241	AR	CACNB2	NM_201596.2	c.590C>T	p.(Ser197Phe)	3		UA	43	1	1	rs150528041	145/276812=0.001	3/24032=0	4/34408=0	0/10146=0	0/18796=0	0/25724=0	136/126464=0.001	0/30778=0	2/6464=0	-2	-2	-3	deleterious	0.02	possibly damaging	0.919	155	33	13.24
242	AR	CACNB2	NM_201596.2	c.1218G>C	p.(Arg406Ser)	3		UA	146	2	1											-1	-1	-1	deleterious	0	probably_damaging	0.996	110	25.7
243	AR	CACNB2	NM_201596.2	c.326A>G	p.(Lys109Arg)	3		UA	149	1	1	rs754070618	1/245510=0	0/15242=0	0/33556=0	0/9836=0	0/17198=0	0/21964=0	1/111466=0	0/30770=0	0/5478=0	3	2	2	tolerated	0.53	probably_damaging	0.997	26	24.8
244	AR	CACNB2	NM_001167945.1	c.591G>T	p.(Lys197Asn)	3		UA	145	2	1	rs199539261	68/276944=0	4/24024=0	2/34416=0	0/10152=0	0/18860=0	0/25714=0	61/126536=0	1/30780=0	0/6462=0	0	0	0	NA	NA	NA	NA	NA	18.01
245	AR	CACNB2	NM_000724.3	c.958G>A	p.(Ala320Thr)	3		ARVC	147	1	1	rs552868927	5/277182=0	1/24034=0	0/34416=0	0/10152=0	0/18854=0	1/25790=0	1/126692=0	1/30782=0	1/6462=0	0	0	0	deleterious	0	probably_damaging	0.979	58	28.0
246	AR	CACNB2	NM_000724.3	c.958G>A	p.(Ala320Thr)	3		UA	148	2	1	rs552868927	5/277182=0	1/24034=0	0/34416=0	0/10152=0	0/18854=0	1/25790=0	1/126692=0	1/30782=0	1/6462=0	0	0	0	deleterious	0	probably_damaging	0.979	58	28.0
247	AR	CACNB2	NM_00724.3	c.1192C>T	p.(Leu398Phe)	3		UA	145	2	2	rs145638628	58/277178=0	3/24018=0	2/34420=0	0/10152=0	0/18862=0	0/25790=0	53/126690=0	0/30780=0	0/6466=0	1	0	0	deleterious	0	probably_damaging	0.942	22	25.8
248	AR	CACNB2	NM_201596.2	c.1773A>C	p.(Lys591Asn)	3		UA	151	1	1	rs772752419	17/275872=0	0/23900=0	0/34312=0	0/10058=0	17/18818=0.001	0/25746=0	0/125930=0	0/30688=0	0/6420=0	0	0	0	tolerated	0.67	benign	0.357	94	17.58
249	AR	CACNB2	NM_000724.3	c.679A>C	p.(Lys227Gln)	3		AF	150	1	1	rs773558424	1/246006=0	0/15298=0	0/33578=0	0/9848=0	0/17238=0	0/22238=0	1/111544=0	0/30780=0	0/5482=0	1	1	1	NA	NA	NA	NA	NA	20.7
250	AR	CALM1	NM_006888.4	c.293A>G	p.(Asn98Ser)	4		CPVT	45	1	1	rs267607277										1	1	0	tolerated	0.19	benign	0.041	46	14.92
251	AR	CALM3	NM_005184.2	c.287A>G	p.(Asp96Gly)	3		LQTS	152	1	1											-1	-1	-2	deleterious	0	benign	0.324	94	27.8
252	AR	CALM3	NM_005184.3	c.402T>A	p.(Asp134Glu)	3		UA	153	2	1	rs755022859										2	2	1	deleterious	0.01	possibly_damaging	0.674	0	22.0
253	CM	CALR3	NM_145046.3	c.245A>G	p.(Lys82Arg)	3		HCM	615	1	1	rs142951029	166/277248=0.001	2/24036=0	2/34420=0	0/10152=0	0/18866=0	1/25794=0	158/126730=0.001	0/30782=0	3/6468=0	3	2	2	tolerated	0.16		benign	0.054	26	33
254	CM	CALR3	NM_145046.3	c.245A>G	p.(Lys82Arg)	3		DCM	616	1	1	rs142951029	166/277248=0.001	2/24036=0	2/34420=0	0/10152=0	0/18866=0	1/25794=0	158/126730=0.001	0/30782=0	3/6468=0	3	2	2	tolerated	0.16		benign	0.054	26	34
255	CM	CALR3	NM_145046.3	c.403G>A	p.(Asp135Asn)	3		NCCM	617	1	1	rs143932873	25/275160=0	3/23844=0	0/34338=0	0/10056=0	1/18810=0	0/25586=0	21/125526=0	0/30580=0	0/6420=0	2	1	1	deleterious	0		probably damaging	0.999	23
256	CM	CALR3	NM_145046.4	c.403G>A	p.(Asp135Asn)	3		DCM	780	1	1	rs143932873	25/275160=0	3/23844=0	0/34338=0	0/10056=0	1/18810=0	0/25586=0	21/125526=0	0/30580=0	0/6420=0	2	1	1	deleterious	0	probably_damaging	0.999	23	32
257	CM	CALR3	NM_145046.4	c.484A>G	p.(Arg162Gly)	3		HCM	1090	2	2		1/245302=0	0/15214=0	0/33530=0	0/9784=0	0/17234=0	0/22232=0	1/111154=0	0/30690=0	0/5464=0	-2	-2	-3	deleterious	0.02	possibly_damaging	0.719	125	22.8
258	CM	CALR3	NM_145046.4	c.626C>T	p.(Thr209Met)	3		HCM	745	4	2	rs746871999	9/277160=0	2/24028=0	1/34418=0	0/10152=0	0/18858=0	0/25778=0	6/126684=0	0/30782=0	0/6460=0	-1	-1	-1	deleterious	0.01	benign	0.006	81	13.00
259	CM	CALR3	NM_145046.4	c.801del	p.(Glu268Lysfs*13)	3		HCM	781	2	1		1/30978=0	1/8734=0	0/838=0	0/302=0	0/1618=0	0/3492=0	0/15014=0	0/0=0	0/980=0	#N/A	#N/A	#N/A	NA	NA	NA	NA	NA	9547
260	CM	CALR3	NM_145046.4	c.833G>A	p.(Arg278His)	3		UCM	782	1	1		2/246270=0	0/15304=0	0/33582=0	0/9850=0	0/17248=0	0/22300=0	2/111720=0	0/30782=0	0/5484=0	0	0	0	deleterious	0.03	benign	0.001	29	15.13
261	CM	CALR3	NM_145046.4	c.833G>A	p.(Arg278His)	3		DCM	1449	2	2		2/246270=0	0/15304=0	0/33582=0	0/9850=0	0/17248=0	0/22300=0	2/111720=0	0/30782=0	0/5484=0	0	0	0	deleterious	0.03	benign	0.001	29	15.13
262	AR	CASQ2	NM_001232.3	c.988C>T	p.(Gln330*)	4		LQTS	4	2	2	rs767023791	1/245148=0	0/15002=0	0/33504=0	0/9782=0	0/17232=0	0/22268=0	1/111282=0	0/30612=0	0/5466=0	NA	NA	NA	NA	NA	NA	NA	NA	44
263	AR	CASQ2	NM_001232.3	c.988C>T	p.(Gln330*)	4		CPVT	159	2	1	rs767023791	1/245148=0	0/15002=0	0/33504=0	0/9782=0	0/17232=0	0/22268=0	1/111282=0	0/30612=0	0/5466=0	-5	-4	-6	0	0	0	0	0	0
264	AR	CASQ2	NM_001232.3	c.141G>C	p.(Lys47Asn)	3		BRS	157	1	1											0	0	0	deleterious	0.01	probably_damaging	1	94	26.4
265	AR	CASQ2	NM_001232.3	c.164A>G	p.(Tyr55Cys)	3		NCCM	155	2	1		4/277064=0	0/24030=0	0/34416=0	0/10148=0	0/18870=0	0/25794=0	4/126558=0	0/30782=0	0/6466=0	-3	-2	-3	deleterious	0.01	probably_damaging	0.975	194	26.3
266	AR	CASQ2	NM_001232.3	c.44C>G	p.(Ser15Cys)	3		UA	156	2	1	rs185539994	5/276886=0	1/24018=0	3/34412=0	0/10146=0	0/18826=0	0/25788=0	1/126456=0	0/30778=0	0/6462=0	-1	-1	-2	tolerated	0.14	possibly_damaging	0.799	112	22.8
267	AR	CASQ2	NM_001232.3	c.538A>G	p.(Lys180Glu)	3		UA	15	2	1											1	1	1	tolerated	0.3	benign	0.125	56	18.72
268	AR	CASQ2	NM_001232.3	c.928G>A	p.(Asp310Asn)	3		LQTS	46	1	1	rs141314684	178/277100=0.001	0/24034=0	6/34420=0	48/10142=0.005	0/18862=0	0/25794=0	70/126600=0.001	48/30782=0.002	6/6466=0.001	2	1	1	tolerated	0.12	benign	0.31	23	24.6
269	AR	CASQ2	NM_001232.3	c.928G>A	p.(Asp310Asn)	3		UA	154	2	1	rs141314684	178/277100=0.001	0/24034=0	6/34420=0	48/10142=0.005	0/18862=0	0/25794=0	70/126600=0.001	48/30782=0.002	6/6466=0.001	2	1	1	tolerated	0.09	benign	0.185	23	24.0
270	AR	CASQ2	NM_001232.3	c.928G>A	p.(Asp310Asn)	3		UA	158	1	1	rs141314684	178/277100=0.001	0/24034=0	6/34420=0	48/10142=0.005	0/18862=0	0/25794=0	70/126600=0.001	48/30782=0.002	6/6466=0.001	2	1	1	tolerated	0.09	benign	0.185	23	24.0
271	AR	CASQ2	NM_001232.3	c.164A>G	p.(Tyr55Cys)	3		CPVT	159	2	2		4/277064=0	0/24030=0	0/34416=0	0/10148=0	0/18870=0	0/25794=0	4/126558=0	0/30782=0	0/6466=0	-3	-2	-3	deleterious	0.01	probably_damaging	0.975	194	26.3
272	AR	CASQ2	NM_001232.3	c.757C>T	p.(Arg253Cys)	3		UA	160	1	1	rs727504510	4/244446=0	0/15256=0	1/33538=0	0/9790=0	0/17226=0	0/21862=0	3/110568=0	0/30746=0	0/5460=0	-3	-3	-4	deleterious	0	probably_damaging	0.955	180	34
273	AR	CASQ2	NM_001232.3	c.985C>T	p.(Pro329Ser)	3		UA	47	1	1	rs28730713	64/276082=0	5/23710=0	0/34346=0	0/10086=0	0/18854=0	17/25766=0.001	41/126262=0	0/30610=0	1/6448=0	-1	-1	-1	deleterious	0	probably damaging	1	74	31
274	both	CAV3	NM_033337.2	c.244G>A	p.(Val82Ile)	3		UA	216	1	1	rs112626848	24/245796=0	1/15286=0	11/33556=0	1/9840=0	1/17240=0	0/22204=0	8/111440=0	2/30746=0	0/5484=0	3	3	3	tolerated	1	benign	0.01	29	12.69	10.38
275	both	CAV3	NM_033337.2	c.244G>A	p.(Val82Ile)	3		BRS	365	2	2	rs112626848	24/245796=0	1/15286=0	11/33556=0	1/9840=0	1/17240=0	0/22204=0	8/111440=0	2/30746=0	0/5484=0	3	3	3	tolerated	1	benign	0.01	29	12.69
276	both	CAV3	NM_033337.2	c.244G>A	p.(Val82Ile)	3		UCM	783	2	1	rs112626848	24/245796=0	1/15286=0	11/33556=0	1/9840=0	1/17240=0	0/22204=0	8/111440=0	2/30746=0	0/5484=0	3	3	3	tolerated	1	benign	0.01	29	12.69
277	both	CAV3	NM_033337.2	c.244G>A	p.(Val82Ile)	3		HCM	1552	2	2	rs112626848	24/245796=0	1/15286=0	11/33556=0	1/9840=0	1/17240=0	0/22204=0	8/111440=0	2/30746=0	0/5484=0	3	3	3	tolerated	1	benign	0.01	29	12.69
278	both	CAV3	NM_033337.2	c.277G>A	p.(Ala93Thr)	3		DCM	812	3	2	rs28936686	40/276972=0	1/24024=0	1/34412=0	0/10140=0	11/18864=0.001	0/25718=0	25/126586=0	2/30764=0	0/6464=0	0	0	0	deleterious	0	probably_damaging	0.999	58	28.6
279	both	CAV3	NM_033337.2	c.277G>A	p.(Ala93Thr)	3		HCM	1209	3	2	rs28936686	40/276972=0	1/24024=0	1/34412=0	0/10140=0	11/18864=0.001	0/25718=0	25/126586=0	2/30764=0	0/6464=0	0	0	0	deleterious	0	probably_damaging	0.999	58	28.6
280	both	CAV3	NM_033337.2	c.306G>A	p.(Asp12033His)	3		HCM	784	2	1	rs149375325	27/277108=0	12/24036=0	2/34418=0	2/10152=0	0/18862=0	0/25738=0	8/126658=0	2/30780=0	1/6464=0				NA	NA	NA	NA	NA	15.31
281	both	CAV3	NM_001234.3	c.443G>A	p.(Arg148Gln)	3		DCM	474	2	1	rs140575619	72/274888=0	27/24010=0.001	33/34402=0.001	0/10122=0	4/18866=0	0/24488=0	6/125786=0	0/30766=0	2/6448=0	1	1	1	tolerated	0.41		benign	0.03	43
282	CM	CDH2		c.2016A>T	p.(Glu672Asp)	3		NCCM	1556	3	1	rs151218256	63/276520=0	1/24002=0	19/34386=0.001	4/10136=0	0/18834=0	1/25772=0	33/126198=0	3/30750=0	2/6442=0	2	2	1	tolerated	0.07	benign	0.001	0	17.57
283	CM	CRYAB	NM_001885.2	c.201+17C>G	p.?	3		UCM	417	4	2	rs782366958	3/225208=0	0/13558=0	0/31174=0	0/9274=0	0/16024=0	0/20366=0	3/101770=0	0/27986=0	0/5056=0	NA	NA	NA	NA	NA		NA	NA	NA
284	CM	CRYAB	NM_001885.2	c.201+17C>G	p.?	3		HCM	475	2	1	rs782366958	3/225208=0	0/13558=0	0/31174=0	0/9274=0	0/16024=0	0/20366=0	3/101770=0	0/27986=0	0/5056=0	NA	NA	NA	NA	NA		NA	NA	NA
285	CM	CRYAB	NM_001885.2	c.277G>T	p.(Val93Leu)	3		NCCM	426	3	2	rs547282752	2/277240=0	0/24038=0	0/34420=0	0/10152=0	0/18870=0	0/25794=0	2/126718=0	0/30782=0	0/6466=0	1	1	1	tolerated	0.05		benign	0.195	32
286	CM	CRYAB	NM_001885.2	c.277G>T	p.(Val93Leu)	3		DCM	785	1	1	rs547282752	2/277240=0	0/24038=0	0/34420=0	0/10152=0	0/18870=0	0/25794=0	2/126718=0	0/30782=0	0/6466=0	1	1	1	deleterious	0.02	benign	0.157	32	24.2
287	CM	CRYAB	NM_001885.2	c.367C>T	p.(Arg123Trp)	3		HCM	786	3	1	rs534473091	6/276970=0	1/24020=0	1/34412=0	0/10150=0	0/18866=0	0/25790=0	4/126488=0	0/30780=0	0/6464=0	-2	-3	-4	deleterious	0	probably_damaging	0.992	101	29.1
288	CM	CRYAB	NM_001885.1	c.469C>T	p.(Arg157Cys)	3		UCM	618	1	1	rs374169381	7/246252=0	0/15304=0	0/33582=0	0/9850=0	0/17248=0	0/22300=0	0/111702=0	7/30780=0	0/5486=0	-3	-3	-4	deleterious	0.02		possibly damaging	0.573	180
289	CM	CSRP3	NM_003476.3	c.10T>C	p.(Trp4Arg)	3		DCM	476	2	1	rs45550635	619/277108=0.002	13/24032=0.001	32/34416=0.001	0/10146=0	1/18860=0	15/25792=0.001	527/126616=0.004	23/30780=0.001	8/6466=0.001	-2	-3	-4	deleterious	0		possibly damaging	0.657	101
290	CM	CSRP3	NM_003476.4	c.10T>C	p.(Trp4Arg)	3		ARVC	619	1	1	rs45550635	619/277108=0.002	13/24032=0.001	32/34416=0.001	0/10146=0	1/18860=0	15/25792=0.001	527/126616=0.004	23/30780=0.001	8/6466=0.001	-2	-3	-4	deleterious	0		possibly damaging	0.657	101
291	CM	CSRP3	NM_003476.3	c.10T>C	p.(Trp4Arg)	3		HCM	620	1	1	rs45550635	619/277108=0.002	13/24032=0.001	32/34416=0.001	0/10146=0	1/18860=0	15/25792=0.001	527/126616=0.004	23/30780=0.001	8/6466=0.001	-2	-3	-4	deleterious	0		possibly damaging	0.657	101
292	CM	CSRP3	NM_003476.3	c.10T>C	p.(Trp4Arg)	3		DCM	621	1	1	rs45550635	619/277108=0.002	13/24032=0.001	32/34416=0.001	0/10146=0	1/18860=0	15/25792=0.001	527/126616=0.004	23/30780=0.001	8/6466=0.001	-2	-3	-4	deleterious	0		possibly damaging	0.657	101
293	CM	CSRP3	NM_003476.3	c.10T>C	p.(Trp4Arg)	3		HCM	787	1	1	rs45550635	619/277108=0.002	13/24032=0.001	32/34416=0.001	0/10146=0	1/18860=0	15/25792=0.001	527/126616=0.004	23/30780=0.001	8/6466=0.001	-2	-3	-4	deleterious	0	possibly_damaging	0.596	101	27.3
294	CM	CSRP3	NM_003476.3	c.10T>C	p.(Trp4Arg)	3		HCM	1026	4	3	rs45550635	619/277108=0.002	13/24032=0.001	32/34416=0.001	0/10146=0	1/18860=0	15/25792=0.001	527/126616=0.004	23/30780=0.001	8/6466=0.001	-2	-3	-4	deleterious	0	possibly_damaging	0.596	101	27.3
295	CM	CSRP3	NM_003476.3	c.152C>A	p.(Ala51Asp)	3		HCM	477	2	1	rs397516853	6/245824=0	0/15298=0	0/33574=0	0/9834=0	0/17246=0	0/22276=0	6/111336=0	0/30780=0	0/5480=0	-2	-2	-2	tolerated	0.58		benign	0.021	126
296	CM	CSRP3	NM_003476.3	c.152C>A	p.(Ala51Asp)	3		UCM	478	2	1	rs397516853	6/245824=0	0/15298=0	0/33574=0	0/9834=0	0/17246=0	0/22276=0	6/111336=0	0/30780=0	0/5480=0	-2	-2	-2	tolerated	0.58		benign	0.021	126
297	CM	CSRP3	NM_003476.4	c.161C>T	p.(Ser54Leu)	3		HCM	788	1	1	rs759455306	3/245846=0	0/15300=0	0/33576=0	0/9836=0	0/17246=0	0/22274=0	0/111358=0	1/30778=0	2/5478=0	-3	-2	-3	tolerated	0.15	benign	0.227	145	23.1
298	CM	CSRP3	NM_003476.4	c.191G>A	p.(Arg64His)	3		DCM	1553	2	1	rs375014380	6/276992=0	2/24026=0	0/34416=0	0/10144=0	1/18868=0	0/25788=0	3/126504=0	0/30780=0	0/6466=0	0	0	0	deleterious	0	possibly_damaging	0.88	29	25.1
299	CM	CSRP3	NM_003476.4	c.251C>T	p.(Thr84Met)	3		HCM	1514	3	2	rs777327517	5/245986=0	0/15302=0	3/33582=0	0/9844=0	0/17244=0	0/22298=0	2/111454=0	0/30780=0	0/5482=0	-1	-1	-1	tolerated	0.09	benign	0.432	81	23.6
300	CM	CSRP3	NM_003476.4	c.282-5_285del	p.?	3		HCM	789	1	1	rs45483799										#N/A	#N/A	#N/A	NA	NA	NA	NA	NA	31
301	CM	CSRP3	NM_003476.4	c.286_287del	p.(Pro96Lysfs*35)	3		HCM	622	1	1	rs766783066										NA	NA	NA	NA	NA		NA	NA	NA
302	CM	CSRP3	NM_003476.4	c.291G>C	p.(Lys97Asn)	3		HCM	1095	3	2	rs763334172										0	0	0	tolerated	0.37	benign	0.003	94	18.81
303	CM	CSRP3	NM_003476.4	c.299G>A	p.(Arg100His)	3	2 (frequency in control databases)	UCM	438	2	2	rs138218523	378/277088=0.001	4/24034=0	3/34418=0	0/10148=0	0/18870=0	128/25794=0.005	227/126576=0.002	5/30782=0	11/6466=0.002	0	0	0	tolerated	0.08		possibly damaging	0.535	29
304	CM	CSRP3	NM_003476.3	c.344G>A	p.(Gly115Glu)	3		HCM	790	1	1	rs143384148	1/246122=0	0/15302=0	0/33582=0	0/9842=0	0/17244=0	0/22300=0	1/111586=0	0/30782=0	0/5484=0	-2	-2	-3	deleterious	0.01	probably_damaging	0.936	98	26.8
305	CM	CSRP3	NM_003476.4	c.352G>A	p.(Glu118Lys)	3		HCM	445	2	2	rs763096875	6/246114=0	0/15302=0	3/33582=0	0/9844=0	0/17248=0	0/22298=0	3/111574=0	0/30782=0	0/5484=0	1	1	1	tolerated	0.29		benign	0.195	56
306	CM	CSRP3	NM_003476.3	c.352G>A	p.(Glu118Lys)	3		HCM	1075	3	2	rs763096875	6/246114=0	0/15302=0	3/33582=0	0/9844=0	0/17248=0	0/22298=0	3/111574=0	0/30782=0	0/5484=0	1	1	1	tolerated	0.05	benign	0.195	56	24.2
307	CM	CSRP3	NM_003476.4	c.367T>C	p.(Cys123Arg)	3		HCM	479	2	1											-3	-3	-4	deleterious	0		probably damaging	0.999	180
308	CM	CSRP3	NM_003476.4	c.377C>T	p.(Ser126Leu)	3		UCM	1562	3	2											-3	-2	-3	deleterious	0.01	benign	0.104	145	25.8
309	CM	CSRP3	NM_003476.4	c.437G>A	p.(Arg146His)	3		HCM	791	2	1	rs377066670	6/246144=0	0/15302=0	0/33580=0	1/9842=0	1/17246=0	0/22300=0	4/111608=0	0/30782=0	0/5484=0	0	0	0	deleterious	0.04	possibly_damaging	0.906	29	33
310	CM	CSRP3	NM_003476.4	c.472A>G	p.(Asn158Asp)	3		HCM	792	1	1		2/246200=0	0/15302=0	0/33580=0	1/9844=0	0/17248=0	0/22300=0	1/111660=0	0/30782=0	0/5484=0	2	1	1	deleterious	0	benign	0.369	23	24.7
311	CM	CSRP3	NM_003476.3	c.514T>C	p.(Tyr172His)	3		HCM	793	1	1											2	2	2	deleterious	0.02	possibly_damaging	0.905	83	32
312	CM	CSRP3	NM_003476.4	c.535A>G	p.(Thr179Ala)	3		Other indication	623	1	1	rs397516859	5/277184=0	0/24038=0	0/34418=0	0/10146=0	0/18868=0	0/25794=0	4/126674=0	1/30782=0	0/6464=0	0	0	0	deleterious	0.01		benign	0.012	58
313	CM	CSRP3	NM_003476.4	c.73T>C	p.(Cys25Arg)	3		DCM	794	4	1											-3	-3	-4	deleterious	0	probably_damaging	0.986	180	30
314	CM	CTNNA3	NM_013266.3	[GRCh37] chr10:g.68280355-68280551del		3		DCM	1231	5	3
315	CM	CTNNA3	NM_013266.3	[GRCh37] chr10:g.68381429_68381561del		3		HCM	991	2	2
316	CM	CTNNA3	NM_013266.3	c.(1281+1_1282-1)_(1374+1_1375-1)del	p.?	3		UCM	1513	1	1
317	CM	CTNNA3	NM_013266.3	c.(2265+1_2266-1)_(2400+1_2401-1)del	p.(Cys756_Ala800del)	3		DCM	795	1	1
318	CM	CTNNA3	NM_013266.3	c.1231A>G	p.(Ile411Val)	3		UCM	796	2	1	rs372808360	18/276814=0	0/24034=0	2/34398=0	0/10136=0	11/18848=0.001	0/25776=0	1/126386=0	1/30778=0	3/6458=0	3	3	3	tolerated	1	benign	0.006	29	17.89
319	CM	CTNNA3	NM_013266.3	c.1231A>G,	p.(Ile411Val)	3		UCM	1423	4	3	rs372808360	18/276814=0	0/24034=0	2/34398=0	0/10136=0	11/18848=0.001	0/25776=0	1/126386=0	1/30778=0	3/6458=0	3	3	3	tolerated	1	benign	0.006	29	17.89
320	CM	CTNNA3	NM_013266.3	c.1282_1531del	p.(Val428Lysfs*13)	3		HCM	797	1	1
321	CM	CTNNA3	NM_013266.3	c.1294G>C	p.(Ala432Pro)	3		HCM	798	1	1											-1	-1	-1	deleterious	0.01	probably_damaging	1	27	28.3
322	CM	CTNNA3	NM_013266.3	c.1303A>G	p.(Met435Val)	3		UCM	796	2	2	rs377404952	20/273146=0	0/23934=0	2/33630=0	0/10014=0	11/18628=0.001	0/25722=0	2/125430=0	1/29434=0	4/6354=0.001	1	1	1	deleterious	0.02	benign	0.012	21	22.7
323	CM	CTNNA3	NM_013266.3	c.1303A>G,	p.(Met435Val)	3		UCM	1423	4	4	rs377404952	20/273146=0	0/23934=0	2/33630=0	0/10014=0	11/18628=0.001	0/25722=0	2/125430=0	1/29434=0	4/6354=0.001	1	1	1	deleterious	0.02	benign	0.012	21	22.7
324	CM	CTNNA3	NM_013266.3	c.1368del	p.(Pro457Hisfs*4)	3		DCM	1467	2	2														NA	NA	NA	NA	NA	29.6
325	CM	CTNNA3	NM_013266.3	c.1451G>A	p.(Arg484His)	3		DCM	480	2	1	rs748621335	12/274984=0	0/23874=0	3/33630=0	0/10122=0	0/18724=0	0/25732=0	7/126012=0	2/30536=0	0/6354=0	0	0	0	deleterious	0.02		benign	0.001	29
326	CM	CTNNA3	NM_013266.3	c.1451G>A	p.(Arg484His)	3		ARVC	799	2	1	rs748621335	12/274984=0	0/23874=0	3/33630=0	0/10122=0	0/18724=0	0/25732=0	7/126012=0	2/30536=0	0/6354=0	0	0	0	deleterious	0.01	benign	0	29	12.89
327	CM	CTNNA3	NM_013266.3	c.1455A>G	p.(=)	3		HCM	800	1	1	rs573782659	17/275112=0	1/23904=0	12/33638=0	0/10124=0	0/18740=0	0/25756=0	3/126054=0	0/30540=0	1/6356=0				NA	NA	NA	NA	NA	0.028
328	CM	CTNNA3	NM_013266.3	c.1507A>C	p.(Ile503Leu)	3		AF	1537	3	1	rs147802834	9/273104=0	0/23730=0	0/33032=0	0/10100=0	0/18512=0	0/25730=0	9/125544=0	0/30194=0	0/6262=0	2	2	1	tolerated	0.48	possibly_damaging	0.57	5	23.4
329	CM	CTNNA3	NM_013266.3	c.1823A>T	p.(Asp608Val)	3		HCM	768	2	2	rs138314889	12/274268=0	0/23758=0	0/33742=0	0/10108=0	0/18732=0	1/25528=0	11/125530=0	0/30498=0	0/6372=0	-3	-3	-4	deleterious	0	probably_damaging	0.998	152	27.3
330	CM	CTNNA3	NM_013266.3	c.1836G>T	p.(Lys612Asn)	3		HCM	966	3	3	rs774209973	2/242452=0	0/14976=0	0/32696=0	0/9784=0	0/17092=0	0/21976=0	1/110262=0	1/30286=0	0/5380=0	0	0	0	deleterious	0.02	probably_damaging	0.987	94	24.5
331	CM	CTNNA3	NM_013266.3	c.1882C>T	p.(Arg628Trp)	3		DCM	801	1	1	rs149081490	3/234662=0	0/14200=0	0/30744=0	0/9678=0	0/16456=0	0/21472=0	3/108098=0	0/28842=0	0/5172=0	-2	-3	-4	deleterious	0	probably_damaging	0.993	101	33
332	CM	CTNNA3	NM_013266.3	c.2129T>C	p.(Met710Thr)	3		UCM	1525	2	2											-1	-1	-1	deleterious	0.04	probably_damaging	0.954	81	26.0
333	CM	CTNNA3	NM_013266.3	c.2501G>A	p.(Arg834Gln)	3		HCM	1495	2	2	rs373081692	2/246134=0	0/15304=0	0/33576=0	0/9846=0	0/17240=0	0/22300=0	2/111602=0	0/30782=0	0/5484=0	1	1	1	deleterious	0.01	benign	0.24	43	25.2
334	CM	CTNNA3	NM_013266.3	c.2550G>A	p.(Met850Ile)	3		DCM	1263	3	2	rs138237676	17/277044=0	2/24030=0	1/34406=0	0/10146=0	0/18866=0	0/25788=0	13/126562=0	1/30782=0	0/6464=0	2	1	1	deleterious	0	probably_damaging	0.954	10	29.8
335	CM	CTNNA3	NM_013266.3	c.2638dup	p.(Ile880Asnfs*9)	3		UCM	802	1	1	rs761152565	2/30946=0	0/8716=0	1/836=0.001	0/302=0	0/1622=0	0/3492=0	1/14996=0	0/0=0	0/982=0				NA	NA	NA	NA	NA	35
336	CM	CTNNA3	NM_013266.3	c.2638dup	p.(Ile880Asnfs*9)	3		DCM	1010	4	2	rs761152565	2/30946=0	0/8716=0	1/836=0.001	0/302=0	0/1622=0	0/3492=0	1/14996=0	0/0=0	0/982=0				NA	NA	NA	NA	NA	35
337	CM	CTNNA3	NM_013266.3	c.2671G>C	p.(Gly891Arg)	3		DCM	803	1	1											-2	-2	-3	tolerated	0.07	probably_damaging	0.921	125	26.4
338	CM	CTNNA3	NM_013266.3	c.3595G>A	p.(Glu1199Lys)	3		DCM	1223	2	2	rs777768807	8/176434=0	4/16312=0	1/24526=0	0/8524=0	1/11790=0	0/18532=0	1/69310=0	1/22702=0	0/4738=0	1	1	1	deleterious	0	benign	0.025	56	23.4
339	CM	CTNNA3	NM_013266.2	c.578A>G	p.(Gln193Arg)	3		DCM	624	1	1	rs373233387	29/276860=0	2/24032=0	0/34316=0	0/10134=0	0/18860=0	2/25764=0	23/126584=0	0/30722=0	2/6448=0	1	1	1	tolerated	0.67		probably damaging	0.932	43
340	CM	CTNNA3	NM_013266.3	c.945_949dup	p.(Ser317Trpfs*33)	3		HCM	1273	3	2														NA	NA	NA	NA	NA	34
341	CM	DES	NM_001927.3	c.1222C>G	p.(Leu408Val)	5		NCCM	512	1	1											1	1	1	deleterious	0		probably damaging	0.94	32
342	CM	DES	NM_001927.3	c.1123C>T	p.(Arg375Trp)	4		NCCM	572	1	1	rs375218723	12/277202=0	2/24028=0	4/34420=0	0/10150=0	1/18864=0	0/25790=0	5/126704=0	0/30782=0	0/6464=0	-2	-3	-4	deleterious	0.01		probably damaging	0.978	101
343	CM	DES	NM_001927.3	c.1202A>G	p.(Glu401Gly)	4		DCM	420	4	1											-2	-2	-3	deleterious	0		possibly damaging	0.46	98
344	CM	DES	NM_001927.3	c.1353C>G	p.(Ile451Met)	4		DCM	573	1	1	rs121913002	15/227336=0	3/13590=0	1/31494=0	0/9310=0	0/16202=0	0/20888=0	11/102678=0	0/27988=0	0/5186=0	2	1	1	deleterious	0		probably damaging	0.954	10
345	CM	DES	NM_001927.3	c.816dup	p.(Ala273Argfs*10)	4		HCM	816	2	1														NA	NA	NA	NA	NA	34	43
346	CM	DES	NM_001927.3	c.1123C>T	p.(Arg375Trp)	3		DCM	804	3	1	rs375218723	12/277202=0	2/24028=0	4/34420=0	0/10150=0	1/18864=0	0/25790=0	5/126704=0	0/30782=0	0/6464=0	-2	-3	-4	deleterious	0	probably_damaging	0.978	101	29.3	4.274
347	CM	DES	NM_001927.3	c.1123C>T	p.(Arg375Trp)	3		DCM	1520	1	1	rs375218723	12/277202=0	2/24028=0	4/34420=0	0/10150=0	1/18864=0	0/25790=0	5/126704=0	0/30782=0	0/6464=0	-2	-3	-4	deleterious	0	probably_damaging	0.978	101	29.3	26.6
348	CM	DES	NM_001927.3	c.1234G>A	p.(Glu412Lys)	3		ARVC	805	3	1	rs869025380										1	1	1	deleterious	0	possibly_damaging	0.792	56	33	16.70
349	CM	DES	NM_001927.3	c.170C>T	p.(Ser57Leu)	3		HCM	806	2	1	rs372825868	73/246140=0	23/20932=0.001	21/32108=0.001	4/9058=0	0/17640=0	0/23202=0	21/109118=0	0/28294=0	4/5788=0.001	-3	-2	-3	tolerated	0.07	benign	0.338	145	24.1	NA
350	CM	DES	NM_001927.3	c.216C>A	p.(Ser72Arg)	3		ARVC	807	5	1	rs375719734	21/178764=0	0/9874=0	7/26536=0	0/8520=0	0/13178=0	0/16592=0	7/74426=0	6/25380=0	1/4258=0	-1	-1	-1	tolerated	0.28	benign	0.42	110	23.1	27.3
351	CM	DES	NM_001927.3	c.250G>A	p.(Gly84Ser)	3		ARVC	808	3	1	rs200545412	23/196058=0	1/17908=0	0/25772=0	0/8680=0	0/13634=0	2/19478=0	19/81384=0	0/24146=0	1/5056=0	0	0	-1	tolerated	0.49	possibly_damaging	0.453	56	23.2	0.001
352	CM	DES	NM_001927.3	c.296A>T	p.(Gln99Leu)	3		NCCM	809	2	1											-2	-2	-3	tolerated	0.07	probably_damaging	0.969	113	25.3	23.5
353	CM	DES	NM_001927.3	c.305T>C	p.(Leu102Pro)	3		DCM	810	5	1											-3	-3	-3	deleterious	0.02	probably_damaging	0.995	98	29.4	NA
354	CM	DES	NM_001927.3	c.635G>A	p.(Arg212Gln)	3		DCM	481	2	1	rs144261171	58/277210=0	0/24034=0	11/34420=0	0/10152=0	3/18866=0	3/25794=0	40/126694=0	0/30782=0	1/6468=0	1	1	1	tolerated	0.06		probably damaging	0.979	43
355	CM	DES	NM_001927.3	c.635G>A	p.(Arg212Gln)	3		UCM	811	2	1	rs144261171	58/277210=0	0/24034=0	11/34420=0	0/10152=0	3/18866=0	3/25794=0	40/126694=0	0/30782=0	1/6468=0	1	1	1	deleterious	0.04	probably_damaging	0.972	43	33	18.88
356	CM	DES	NM_001927.3	c.679C>T	p.(Arg227Cys)	3		DCM	812	3	1	rs767743962	2/246258=0	0/15304=0	1/33580=0	0/9850=0	0/17248=0	0/22298=0	1/111710=0	0/30782=0	0/5486=0	-3	-3	-4	deleterious	0	probably_damaging	0.992	180	32	15.53
357	CM	DES	NM_001927.3	c.742C>A	p.(Arg248Ser)	3		DCM	813	4	1	rs772117708										-1	-1	-1	deleterious	0.04	possibly_damaging	0.73	110	27.0	27.6
358	CM	DES	NM_001927.3	c.79G>A	p.(Gly27Ser)	3		HCM	1083	3	3	rs727504877	2/252976=0	0/20860=0	0/32816=0	0/9316=0	0/17294=0	0/24480=0	2/113252=0	0/29006=0	0/5952=0	0	0	-1	tolerated	0.82	benign	0.07	56	21.1	27.4
359	CM	DES	NM_001927.3	c.802C>G	p.(Pro268Ala)	3		DCM	814	1	1											-1	-1	-1	deleterious	0	probably_damaging	1	27	26.5	23.6
360	CM	DES	NM_001927.3	c.802C>G	p.(Pro268Ala)	3		DCM	815	2	1											-1	-1	-1	deleterious	0	probably_damaging	1	27	26.5	NA
361	CM	DES	NM_001927.3	c.845A>G	p.(Glu282Gly)	3		HCM	817	3	1											-2	-2	-3	deleterious	0	probably_damaging	1	98	26.9	34
362	CM	DES	NM_001927.3	c.897+5G>T	p.?	3		UCM	818	2	1	rs762634257													NA	NA	NA	NA	NA	22.0	34
363	CM	DES	NM_001927.3	c.934G>A	p.(Asp312Asn)	3		HCM	781	2	2	rs34337334	52/276762=0	47/23994=0.002	0/34418=0	0/10152=0	0/18860=0	0/25506=0	2/126604=0	2/30776=0	1/6452=0	2	1	1	deleterious	0	probably_damaging	0.969	23	27.9
364	CM	DES	NM_001927.3	c.935A>C	p.(Asp312Ala)	3		DCM	420	4	3	rs148947510	110/276816=0	82/23990=0.003	11/34418=0	0/10152=0	0/18864=0	0/25548=0	9/126620=0	4/30770=0	4/6454=0.001	-2	-2	-2	deleterious	0.01		probably damaging	0.928	126
365	CM	DES	NM_001927.3	c.935A>C	p.(Asp312Ala)	3		HCM	942	3	3	rs148947510	110/276816=0	82/23990=0.003	11/34418=0	0/10152=0	0/18864=0	0/25548=0	9/126620=0	4/30770=0	4/6454=0.001	-2	-2	-2	deleterious	0.01		probably damaging	0.928	126
366	CM	DES	NM_001927.3	c.935A>C	p.(Asp312Ala)	3		DCM	430	3	3	rs148947510	110/276816=0	82/23990=0.003	11/34418=0	0/10152=0	0/18864=0	0/25548=0	9/126620=0	4/30770=0	4/6454=0.001	-2	-2	-2	deleterious	0.01		probably damaging	0.928	126
367	AR	DPP6	NM_001936	c.-340C>T	p.?	5		UA	2	2	1											NA	NA	NA	NA	NA	NA	NA	NA	14.02
368	AR	DPP6	NM_001936	c.-340C>T	p.?	5		VF	192	1	1														NA	NA	NA	NA	NA	16.09
369	AR	DPP6	NM_001936	c.-340C>T	p.?	5		UA	193	1	1														NA	NA	NA	NA	NA	16.09
370	AR	DPP6	NM_001936	c.-340C>T	p.?	5		UA	217	2	1														NA	NA	NA	NA	NA	16.09	34
371	AR	DPP6	NM_001936	c.-340C>T	p.?	5		UA	218	1	1														NA	NA	NA	NA	NA	16.09	22.7
372	CM	DSC2	NM_004949.3	c.943-1G>A	p.?	4		ARVC	829	3	1	rs796756333													NA	NA	NA	NA	NA	32	22.5
373	CM	DSC2	NM_004949.3	c.136G>A	p.(Gly46Lys)	3		amyloidosis	819	1	1	rs180908546	25/276984=0	0/24010=0	1/34392=0	2/10148=0	0/18862=0	1/25716=0	14/126630=0	7/30770=0	0/6456=0	1	1	1	tolerated	0.12	benign	0.013	56	16.35	22.9
374	CM	DSC2	NM_024422.3	c.1663G>A	p.(Gly555Arg)	3		ARVC	1545	2	1											-2	-2	-3	tolerated	0.12	benign	0.058	125	20.9	0.001
375	CM	DSC2	NM_004949.3	c.1721G>A	p.(Ser574Asn)	3		UCM	820	3	1	rs150318400	17/276772=0	1/24008=0	0/34368=0	0/10142=0	0/18830=0	0/25774=0	16/126424=0	0/30774=0	0/6452=0	1	1	0	tolerated	0.4	benign	0.024	46	17.01	28.3
376	CM	DSC2	NM_004949.3	c.1721G>A	p.(Ser574Asn)	3		DCM	821	2	1	rs150318400	17/276772=0	1/24008=0	0/34368=0	0/10142=0	0/18830=0	0/25774=0	16/126424=0	0/30774=0	0/6452=0	1	1	0	tolerated	0.4	benign	0.024	46	17.01	24.4
377	CM	DSC2	NM_004949.3	c.1721G>A	p.(Ser574Asn)	3		UCM	822	1	1	rs150318400	17/276772=0	1/24008=0	0/34368=0	0/10142=0	0/18830=0	0/25774=0	16/126424=0	0/30774=0	0/6452=0	1	1	0	tolerated	0.4	benign	0.024	46	17.01	27.6
378	CM	DSC2	NM_024422.3	c.1729A>G	p.(Ile577Val)	3		UCM	486	2	1	rs201845641	73/276832=0	0/24022=0	0/34370=0	0/10144=0	0/18836=0	1/25772=0	72/126466=0.001	0/30770=0	0/6452=0	3	3	3	tolerated	0.06		benign	0.041	29
379	CM	DSC2	NM_004949.3	c.1729A>G	p.(Ile577Val)	3		DCM	823	2	1	rs201845641	73/276832=0	0/24022=0	0/34370=0	0/10144=0	0/18836=0	1/25772=0	72/126466=0.001	0/30770=0	0/6452=0	3	3	3	tolerated	0.11	benign	0.041	29	13.85	33
380	CM	DSC2	NM_024422.3	c.210C>A	p.(Asp70Glu)	3		DCM	1561	3	1											2	2	1	deleterious	0.01	possibly_damaging	0.889	0	21.8	23.0
381	CM	DSC2	NM_004949.3	c.2229A>C	p.(Glu743Asp)	3		DCM	815	2	2		1/246068=0	0/15302=0	0/33576=0	0/9844=0	0/17238=0	0/22294=0	1/111552=0	0/30782=0	0/5480=0	2	2	1	deleterious	0	probably_damaging	0.999	0	24.3	24.2
382	CM	DSC2	NM_004949.3	c.2298G>C	p.(Gln766His)	3		UCM	824	1	1	rs139558481	14/276788=0	7/24032=0	1/34410=0	0/10138=0	0/18858=0	0/25790=0	2/126326=0	1/30778=0	3/6456=0	1	0	1	tolerated	0.22	benign	0.013	24	1014	NA
383	CM	DSC2	NM_004949.3	c.23G>T	p.(Gly8Val)	3		HCM	953	3	2	rs794728063	13/147898=0	0/13000=0	0/23182=0	0/7942=0	0/10624=0	0/9668=0	13/57888=0	0/21322=0	0/4272=0	-3	-3	-4	tolerated	0.07	benign	0.299	109	17.42	9.063
384	CM	DSC2	NM_004949.3	c.2498G>A	p.(Arg833His)	3		HCM	1086	4	2	rs370325533	48/276214=0	47/24018=0.002	0/34418=0	0/10138=0	1/18852=0	0/25790=0	0/125760=0	0/30782=0	0/6456=0	0	0	0	tolerated	0.06	benign	0.127	29	21.7	13.03
385	CM	DSC2	NM_024422.3	c.2587G>A	p.(Gly863Arg)	3		HCM	825	3	1	rs147109895	73/276846=0	5/24032=0	8/34414=0	0/10140=0	1/18856=0	0/25780=0	39/126396=0	19/30770=0.001	1/6458=0	-2	-2	-3	deleterious	0	probably_damaging	1	125	25.7	34
386	CM	DSC2	NM_024422.3	c.2587G>A	p.(Gly863Arg)	3		DCM	1234	3	3	rs147109895	73/276846=0	5/24032=0	8/34414=0	0/10140=0	1/18856=0	0/25780=0	39/126396=0	19/30770=0.001	1/6458=0	-2	-2	-3	deleterious	0	probably_damaging	1	125	25.7	25.4
387	CM	DSC2	NM_024422.4	c.2591C>T	p.(Ser864Leu)	3		HCM	826	3	1	rs202031070	7/276726=0	2/24030=0	0/34412=0	0/10136=0	0/18852=0	0/25772=0	5/126306=0	0/30768=0	0/6450=0	-3	-2	-3	deleterious	0	probably_damaging	0.999	145	24.6	27.3
388	CM	DSC2	NM_004949.3	c.266C>T	p.(Ser89Leu)	3		DCM	951	6	2	rs141379407	24/276632=0	1/24014=0	9/34388=0	0/10132=0	1/18866=0	0/25766=0	13/126278=0	0/30742=0	0/6446=0	-3	-2	-3	deleterious	0.04	benign	0.031	145	16.99	NA
389	CM	DSC2	NM_004949.3	c.286A>G	p.(Ile96Val)	3		HCM	1211	2	2	rs772447450	5/245634=0	0/15290=0	0/33530=0	0/9828=0	0/17244=0	0/22262=0	4/111312=0	0/30704=0	1/5464=0	3	3	3	tolerated	0.11	possibly_damaging	0.447	29	21.6	12.85
390	CM	DSC2	NM_004949.3	c.327A>G	p.(Ile109Met)	3		DCM	827	3	1	rs373305929	9/245638=0	0/15288=0	0/33526=0	0/9830=0	0/17244=0	0/22272=0	6/111306=0	1/30702=0	2/5470=0	2	1	1	tolerated	0.06	benign	0.189	10	9761	19.19
391	CM	DSC2	NM_024422.3	c.46C>A	p.(Arg16=)	3		ARVC	1599	1	1														NA	NA	NA	NA	NA	10.70	27.7
392	CM	DSC2	NM_004949.3	c.776-1G>A	p.?	3		DCM	482	2	1											NA	NA	NA	NA	NA		NA	NA	NA
393	CM	DSC2	NM_004949.3	c.802A>G	p.(Thr268Ala)	3		HCM	752	6	5	rs201015785	40/276986=0	3/24026=0	7/34376=0	5/10150=0	0/18856=0	0/25784=0	22/126566=0	3/30776=0	0/6452=0	0	0	0	tolerated	0.06	probably_damaging	0.963	58	23.1	23.5
394	CM	DSC2	NM_004949.3	c.854T>C	p.(Ile285Thr)	3		NCCM	457	2	2	rs199918720	41/277096=0	0/24034=0	0/34392=0	0/10148=0	1/18866=0	34/25786=0.001	5/126628=0	1/30780=0	0/6462=0	-1	-1	-1	deleterious	0.01		benign	0.315	89
395	CM	DSC2	NM_024422.3	c.854T>C	p.(Ile285Thr)	3		ARVC	1597	2	2	rs199918720	41/277096=0	0/24034=0	0/34392=0	0/10148=0	1/18866=0	34/25786=0.001	5/126628=0	1/30780=0	0/6462=0	-1	-1	-1	deleterious	0	benign	0.315	89	21.2	26.6
396	CM	DSC2	NM_024422.3	c.865C>T	p.(Pro289Ser)	3		HCM	483	2	1	rs200802591	8/277140=0	0/24036=0	0/34408=0	0/10152=0	0/18864=0	0/25792=0	8/126642=0	0/30782=0	0/6464=0	-1	-1	-1	tolerated	0.08		probably damaging	1	74
397	CM	DSC2	NM_004949.3	c.865C>T	p.(Pro289Ser)	3		UCM	484	2	1	rs200802591	8/277140=0	0/24036=0	0/34408=0	0/10152=0	0/18864=0	0/25792=0	8/126642=0	0/30782=0	0/6464=0	-1	-1	-1	tolerated	0.08		probably damaging	1	74
398	CM	DSC2	NM_024422.3	c.865C>T	p.(Pro289Ser)	3		DCM	828	1	1	rs200802591	8/277140=0	0/24036=0	0/34408=0	0/10152=0	0/18864=0	0/25792=0	8/126642=0	0/30782=0	0/6464=0	-1	-1	-1	deleterious	0.04	probably_damaging	1	74	23.8	24.5
399	CM	DSC2	NM_024422.3	c.865C>T	p.(Pro289Ser)	3		ARVC	1159	2	2	rs200802591	8/277140=0	0/24036=0	0/34408=0	0/10152=0	0/18864=0	0/25792=0	8/126642=0	0/30782=0	0/6464=0	-1	-1	-1	deleterious	0.04	probably_damaging	1	74	23.8	14.36
400	CM	DSC2	NM_024422.3	c.865C>T	p.(Pro289Ser)	3		UCM	1593	2	2	rs200802591	8/277140=0	0/24036=0	0/34408=0	0/10152=0	0/18864=0	0/25792=0	8/126642=0	0/30782=0	0/6464=0	-1	-1	-1	deleterious	0.04	probably_damaging	1	74	23.8	29.5
401	CM	DSC2	NM_004949.3	c.901A>Gp	p.(Thr301Ala)	3		HCM	786	3	2	rs576466497	14/246208=0	0/15304=0	0/33578=0	0/9848=0	0/17246=0	0/22300=0	14/111666=0	0/30782=0	0/5484=0	0	0	0	deleterious	0.03	possibly_damaging	0.859	58	24.6	26.3
402	CM	DSC2	NM_024422.4	c.942+3A>G	p.?	3		UCM	943	2	2		3/277118=0	0/24032=0	0/34398=0	0/10152=0	0/18868=0	1/25788=0	2/126634=0	0/30782=0	0/6464=0				NA	NA	NA	NA	NA	20.9	NA
403	CM	DSC2	NM_024422.3	c.959A>C	p.(Gln320Pro)	3		DCM	485	2	1											-1	-1	-2	tolerated	0.28		possibly damaging	0.53	76
404	CM	DSG2	NM_001943.3	c.[378+1G>T];[378+1G>T]	p.?	5		UCM	836	1	1														NA	NA	NA	NA	NA	34	32
405	CM	DSG2	NM_001943.3	c.1143del	p.(Asn381Lysfs*2)	4		HCM	435	2	2											NA	NA	NA	NA	NA		NA	NA	NA
406	CM	DSG2	NM_001943.3	c.803_810dup	p.(Val271Ilefs*4)	4		ARVC	838	1	1														NA	NA	NA	NA	NA	34	23.4
407	CM	DSG2	NM_001943.4	c.-5del	p.?	3		ARVC	1144	3	2		1/30610=0	0/8638=0	0/796=0	0/300=0	0/1618=0	0/3390=0	1/14890=0	0/0=0	0/978=0				NA	NA	NA	NA	NA	12.96	28.4
408	CM	DSG2	NM_001943.3	c.1003A>G	p.(Thr335Ala)	3		HCM	436	2	2	rs191564916	141/277086=0.001	5/24016=0	15/34416=0	0/10148=0	0/18864=0	29/25792=0.001	84/126612=0.001	0/30782=0	8/6456=0.001	0	0	0	tolerated	0.21		possibly damaging	0.67	58
409	CM	DSG2	NM_001943.4	c.1003A>G	p.(Thr335Ala)	3		ARVC	1163	2	2	rs191564916	141/277086=0.001	5/24016=0	15/34416=0	0/10148=0	0/18864=0	29/25792=0.001	84/126612=0.001	0/30782=0	8/6456=0.001	0	0	0	deleterious	0.02	possibly_damaging	0.67	58	23.0	35
410	CM	DSG2	NM_001943.4	c.1095G>C	p.(Arg365Ser)	3		UCM	830	1	1	rs749191457	4/277020=0	0/24014=0	0/34414=0	0/10148=0	0/18870=0	0/25778=0	3/126558=0	1/30780=0	0/6458=0	-1	-1	-1	tolerated	0.11	benign	0.062	110	14.62	NA
411	CM	DSG2	NM_001943.4	c.1109dup	p.(Thr371Tyrfs*19)	3		HCM	831	2	1														NA	NA	NA	NA	NA	27.0	31
412	CM	DSG2	NM_001943.3	c.1502A>G	p.(Glu501Gly)	3		HCM	1536	1	1											-2	-2	-3	deleterious	0.03	benign	0.026	98	18.67	26.4
413	CM	DSG2	NM_001943.3	c.1820A>G	p.(Tyr607Cys)	3		HCM	832	1	1	rs766843045	6/276712=0	4/24012=0	0/34410=0	0/10134=0	1/18870=0	0/25756=0	1/126298=0	0/30782=0	0/6450=0	-3	-2	-3	tolerated	0.13	possibly_damaging	0.781	194	21.6	NA
414	CM	DSG2	NM_001943.4	c.1885C>A	p.(Pro629Thr)	3		DCM	833	4	1	rs200804638										-1	-1	-2	deleterious	0	probably_damaging	0.999	38	24.1	25.3
415	CM	DSG2	NM_001943.3	c.1886C>A	p.(Pro629Gln)	3		HCM	834	2	1											-1	-1	-2	deleterious	0	probably_damaging	0.999	76	24.7	30
416	CM	DSG2	NM_001943.3	c.2192A>C	p.(Gln731Pro)	3		HCM	861	3	3	rs202063433	28/277066=0	26/24020=0.001	1/34418=0	0/10142=0	0/18868=0	0/25794=0	0/126582=0	0/30782=0	1/6460=0	-1	-1	-2	tolerated	0.19	benign	0.007	76	12.36	34
417	CM	DSG2	NM_001943.4	c.2434G>A	p.(Gly812Ser)	3		UCM	835	1	1	rs374911318	5/277136=0	0/24030=0	0/34416=0	0/10146=0	0/18868=0	0/25782=0	5/126652=0	0/30776=0	0/6466=0	1	1	1	tolerated	0.11	benign	0.007	21	2206	11.46
418	CM	DSG2	NM_001943.3	c.2623A>G	p.(Met875Val)	3		DCM	487	2	1	rs370316475	10/276172=0	1/23940=0	0/34398=0	0/10104=0	0/18860=0	2/25786=0	6/125870=0	0/30770=0	1/6444=0	1	1	1	tolerated	0.9		benign	0	21
419	CM	DSG2	NM_001943.3	c.2742T>C	p.(=)	3		DCM	1205	3	3	rs529198523	4/276768=0	3/24014=0	0/34412=0	0/10142=0	0/18864=0	0/25790=0	1/126308=0	0/30782=0	0/6456=0				NA	NA	NA	NA	NA	15.68	32
420	CM	DSG2	NM_001943.3	c.593A>G	p.(Tyr198Cys)	3		HCM	456	2	2	rs786204291	5/277028=0	3/24016=0	1/34408=0	0/10146=0	0/18864=0	0/25786=0	1/126576=0	0/30778=0	0/6454=0	-3	-2	-3	deleterious	0		probably damaging	0.977	194
421	CM	DSG2	NM_001943.3	c.765A>T	p.(Gln255His)	3		UCM	837	3	1											1	0	1	tolerated	0.1	benign	0.075	24	22.3	23.9
422	CM	DSG2	NM_001943.3	c.854A>C	p.(Gln285Pro)	3		ARVC	808	3	2	rs374176143										-1	-1	-2	tolerated	0.06	possibly_damaging	0.69	76	21.6	29.8
423	CM	DSG2	NM_001943.3	c.862G>A	p.(Val288Ile)	3		UCM	839	2	1	rs780374242	13/277006=0	1/24022=0	0/34418=0	0/10142=0	0/18866=0	0/25790=0	11/126528=0	1/30782=0	0/6458=0	3	3	3	deleterious	0.02	probably_damaging	0.917	29	23.4	27.6
424	CM	DSG2	NM_001943.3	c.862G>A	p.(Val288Ile)	3		UCM	840	1	1	rs780374242	13/277006=0	1/24022=0	0/34418=0	0/10142=0	0/18866=0	0/25790=0	11/126528=0	1/30782=0	0/6458=0	3	3	3	deleterious	0.02	probably_damaging	0.917	29	23.4	14.49
425	CM	DSG2	NM_001943.3	c.862G>A	p.(Val288Ile)	3		UCM	841	3	1	rs780374242	13/277006=0	1/24022=0	0/34418=0	0/10142=0	0/18866=0	0/25790=0	11/126528=0	1/30782=0	0/6458=0	3	3	3	deleterious	0.02	probably_damaging	0.917	29	23.4	34
426	CM	DSG2	NM_001943.3	c.874C>T	p.(Arg292Cys)	3		HCM	1567	2	2	rs770921270	12/246030=0	0/15286=0	1/33580=0	0/9840=0	4/17246=0	0/22298=0	4/111522=0	3/30782=0	0/5476=0	-3	-3	-4	deleterious	0	probably_damaging	0.993	180	25.0	20.9
427	CM	DSG2	NM_001943.3	c.880A>G	p.(Lys294Glu)	3		HCM	423	3	3	rs752432726	6/277042=0	0/24018=0	0/34418=0	0/10144=0	0/18868=0	0/25792=0	6/126564=0	0/30782=0	0/6456=0	1	1	1	tolerated	0.1		possibly damaging	0.698	56
428	CM	DSG2	NM_001943.3	c.889G>A	p.(Asp297Asn)	3		UCM	425	3	3	rs751012696	3/277036=0	1/24012=0	2/34418=0	0/10144=0	0/18866=0	0/25792=0	0/126566=0	0/30782=0	0/6456=0	2	1	1	deleterious	0.02		probably damaging	1	23
429	CM	DSP	NM_004415.2	c.1266+1G>T	p.?	5		DCM	843	4	1														NA	NA	NA	NA	NA	34	24.2
430	CM	DSP	NM_004415.2	c.1266+1G>T	p.?	5		ARVC	844	2	1														NA	NA	NA	NA	NA	34	32
431	CM	DSP	NM_004415.2	c.1266+1G>T	p.?	5		NCCM	845	4	1														NA	NA	NA	NA	NA	34	28.9
432	CM	DSP	NM_004415.3	c.1670_1671del	p.(Ile557Argfs*27)	5		ARVC	849	4	1											#N/A	#N/A	#N/A	NA	NA	NA	NA	NA	34
433	CM	DSP	NM_004415.3	c.2130+1G>A	p.?	5		ARVC	851	1	1	rs727505115													NA	NA	NA	NA	NA	28.3
434	CM	DSP	NM_004415.2	c.2297+2T>A	p.?	5		HCM	852	2	1	rs796218194													NA	NA	NA	NA	NA	32
435	CM	DSP	NM_004415.2	c.872_873dup	p.(Glu292Argfs*26)	5		ARVC	873	1	1											#N/A	#N/A	#N/A	NA	NA	NA	NA	NA	34
436	CM	DSP	NM_004415.2	c.939+1G>A	p.?	5		UCM	874	4	1	rs727504443	1/30946=0	1/8706=0	0/838=0	0/302=0	0/1620=0	0/3492=0	0/15006=0	0/0=0	0/982=0				NA	NA	NA	NA	NA	34
437	CM	DSP	NM_020778.4	[GrCh37] chr6:7.583.596_7591017del		4		HCM	1007	3	2
438	CM	DSP	NM_004415.2	c.2637G>A	p.(Trp879*)	4		DCM	451	2	1											NA	NA	NA	NA	NA		NA	NA	NA
439	CM	DSP	NM_004415.3	c.4180C>T	p.(Gln1394*)	4		NCCM	860	2	1	rs140474226	1/246126=0	0/15284=0	0/33580=0	0/9844=0	0/17244=0	0/22296=0	1/111616=0	0/30780=0	0/5482=0	-5	-4	-6	NA	NA	NA	NA	NA	40
440	CM	DSP	NM_004415.2	c.5130dup	p.(Glu1711Argfs*23)	4		ARVC	863	1	1											#N/A	#N/A	#N/A	NA	NA	NA	NA	NA	35
441	CM	DSP	NM_004415.2	c.5208_5209del	p.(Gly1737Thrfs*7)	4		DCM	864	4	1											#N/A	#N/A	#N/A	NA	NA	NA	NA	NA	23.8
442	CM	DSP	NM_004415.2	c.5419C>T	p.(Gln1807*)	4		ARVC	866	1	1											-5	-4	-6	NA	NA	NA	NA	NA	40
443	CM	DSP	NM_004415.2	c.6850C>T	p.(Arg2284*)	4		DCM	869	2	1	rs794728130										-5	-4	-6	NA	NA	NA	NA	NA	41
444	CM	DSP	NM_004415.3	Chr6(GRCh37):g.[7583596_7591017del; 7583596_7583597insACAA]		4		HCM	877	1	1
445	CM	DSP	NM_004415.3	c.1048T>C	p.(Tyr350His)	3		DCM	842	4	1											2	2	2	deleterious	0	probably_damaging	0.999	83	28.4	23.3
446	CM	DSP	NM_004415.2	c.137G>A	p.(Gly46Asp)	3		UCM	846	1	1											-1	-1	-2	deleterious	0	possibly_damaging	0.701	94	23.3
447	CM	DSP	NM_004415.2	c.137G>A	p.(Gly46Asp)	3		DCM	847	1	1	rs140403872	5/198348=0	0/17772=0	0/27416=0	0/8688=0	0/13884=0	0/19706=0	5/81320=0	0/24474=0	0/5088=0	-1	-1	-2	tolerated	0.31	benign	0.007	94	12.71
448	CM	DSP	NM_004415.2	c.137G>A	p.(Gly46Asp)	3		DCM	848	3	1	rs140403872	5/198348=0	0/17772=0	0/27416=0	0/8688=0	0/13884=0	0/19706=0	5/81320=0	0/24474=0	0/5088=0	-1	-1	-2	tolerated	0.31	benign	0.007	94	12.71
449	CM	DSP	NM_004415.2	c.137G>A	p.(Gly46Asp)	3		UCM	1212	3	2	rs140403872	5/198348=0	0/17772=0	0/27416=0	0/8688=0	0/13884=0	0/19706=0	5/81320=0	0/24474=0	0/5088=0	-1	-1	-2	tolerated	0.31	benign	0.007	94	12.71
450	CM	DSP	NM_004415.2	c.1501G>A	p.(Val501Ile)	3		HCM	1535	1	1	rs368778031	8/246222=0	0/15304=0	0/33580=0	0/9848=0	1/17248=0	0/22300=0	4/111676=0	3/30782=0	0/5484=0	3	3	3	tolerated	0.44	benign	0.014	29	21.3
451	CM	DSP	NM_004415.2	c.1671A>G	p.(Ile557Met)	3		DCM	628	1	1	rs766505506	2/245988=0	0/15302=0	0/33578=0	0/9846=0	0/17248=0	0/22294=0	2/111454=0	0/30782=0	0/5484=0	2	1	1	deleterious	0		benign	0.354	10
452	CM	DSP	NM_004415.3	c.1671A>G	p.(Ile557Met)	3		HCM	1117	3	2	rs766505506	2/245988=0	0/15302=0	0/33578=0	0/9846=0	0/17248=0	0/22294=0	2/111454=0	0/30782=0	0/5484=0	2	1	1	deleterious	0	benign	0.296	10	15.67
453	CM	DSP	NM_004415.3	c.1949A>G	p.(Asn650Ser)	3		DCM	850	1	1	rs145650440	10/276652=0	10/24020=0	0/34414=0	0/10142=0	0/18864=0	0/25616=0	0/126358=0	0/30780=0	0/6458=0	1	1	0	tolerated	0.73	benign	0.001	46	17.76
454	CM	DSP	NM_004415.2	c.242G>A	p.(Cys81Tyr)	3		HCM	625	1	1	rs140965835	42/277042=0	3/24034=0	4/34412=0	0/10146=0	0/18868=0	1/25752=0	34/126588=0	0/30778=0	0/6464=0	-3	-2	-3	tolerated	0.14		probably damaging	0.986	194
455	CM	DSP	NM_004415.2	c.242G>A	p.(Cys81Tyr)	3		DCM	853	1	1	rs140965835	42/277042=0	3/24034=0	4/34412=0	0/10146=0	0/18868=0	1/25752=0	34/126588=0	0/30778=0	0/6464=0	-3	-2	-3	tolerated	0.11	probably_damaging	0.986	194	23.8
456	CM	DSP	NM_004415.3	c.2468C>T	p.(Ser823Leu)	3		HCM	854	2	1	rs141834182	16/277002=0	12/23986=0.001	0/34410=0	0/10150=0	3/18866=0	0/25762=0	0/126594=0	1/30778=0	0/6456=0	-3	-2	-3	tolerated	0.07	benign	0.069	145	23.1
457	CM	DSP	NM_004415.3	c.2468C>T	p.(Ser823Leu)	3		DCM	855	3	1	rs141834182	16/277002=0	12/23986=0.001	0/34410=0	0/10150=0	3/18866=0	0/25762=0	0/126594=0	1/30778=0	0/6456=0	-3	-2	-3	tolerated	0.07	benign	0.069	145	23.1
458	CM	DSP	NM_004415.2	c.2596C>T	p.(Arg866Cys)	3	2 (frequency in control databases)	HCM	428	4	3	rs142429411	170/277144=0.001	151/24024=0.006	13/34418=0	0/10150=0	0/18868=0	0/25794=0	4/126644=0	1/30780=0	1/6466=0	-3	-3	-4	deleterious	0		probably damaging	0.996	180
459	CM	DSP	NM_004415.2	c.2644G>A	p.(Glu882Lys)	3		ARVC	488	2	1	rs730880081	6/246026=0	0/15302=0	0/33576=0	0/9844=0	0/17244=0	0/22288=0	6/111518=0	0/30782=0	0/5472=0	1	1	1	deleterious	0.01		possibly damaging	0.836	56
460	CM	DSP	NM_004415.2	c.2683T>C	p.(Tyr895His)	3		HCM	856	3	1	rs375891215	36/277060=0	34/24034=0.001	2/34418=0	0/10148=0	0/18864=0	0/25790=0	0/126566=0	0/30782=0	0/6458=0	2	2	2	deleterious	0.01	possibly_damaging	0.687	83	27.0
461	CM	DSP	NM_004415.2	c.269A>G	p.(Gln90Arg)	3		DCM	418	3	3	rs188516326	182/276430=0.001	0/23978=0	1/34388=0	0/10138=0	173/18846=0.009	0/25630=0	4/126296=0	4/30720=0	0/6434=0	1	1	1	deleterious	0.04		probably damaging	0.932	43
462	CM	DSP	NM_004415.2	c.273+5G>A	p.?	3		HCM	626	1	1	rs200473206	79/275742=0	4/23912=0	4/34342=0	0/10124=0	0/18818=0	1/25506=0	68/125966=0.001	2/30656=0	0/6418=0	NA	NA	NA	NA	NA		NA	NA	NA
463	CM	DSP	NM_004415.2	c.273+5G>A	p.?	3		DCM	627	1	1	rs200473206	79/275742=0	4/23912=0	4/34342=0	0/10124=0	0/18818=0	1/25506=0	68/125966=0.001	2/30656=0	0/6418=0	NA	NA	NA	NA	NA		NA	NA	NA
464	CM	DSP	NM_004415.2	c.273+5G>A	p.?	3		DCM	857	2	1	rs200473206	79/275742=0	4/23912=0	4/34342=0	0/10124=0	0/18818=0	1/25506=0	68/125966=0.001	2/30656=0	0/6418=0				NA	NA	NA	NA	NA	18.79
465	CM	DSP	NM_004415.2	c.3004C>T	p.(Arg1002Trp)	3		HCM	466	2	2	rs772551736	10/246068=0	0/15298=0	4/33576=0	0/9848=0	0/17248=0	0/22272=0	5/111572=0	1/30780=0	0/5474=0	-2	-3	-4	deleterious	0		possibly damaging	0.824	101
466	CM	DSP	NM_004415.2	c.3004C>T	p.(Arg1002Trp)	3		DCM	858	3	1	rs772551736	10/246068=0	0/15298=0	4/33576=0	0/9848=0	0/17248=0	0/22272=0	5/111572=0	1/30780=0	0/5474=0	-2	-3	-4	deleterious	0	possibly_damaging	0.824	101	29.4
467	CM	DSP	NM_004415.2	c.3294C>G	p.(Asp1098Glu)	3		HCM	422	3	2	rs535762713	7/276544=0	1/23926=0	0/34392=0	0/10124=0	0/18854=0	0/25792=0	6/126248=0	0/30758=0	0/6450=0	2	2	1	tolerated	1		benign	0.031	0
468	CM	DSP	NM_004415.2	c.3562T>C	p.(Tyr1188His)	3		UCM	484	2	2	rs141508330	24/276234=0	0/23940=0	2/34378=0	0/10136=0	0/18814=0	0/25772=0	20/126026=0	0/30724=0	2/6444=0	2	2	2	tolerated	0.53		probably damaging	0.994	83
469	CM	DSP	NM_004415.3	c.3862A>C	p.(Lys1288Gln)	3		HCM	955	2	2	rs138907450	71/276710=0	2/23958=0	15/34408=0	0/10126=0	10/18860=0.001	0/25794=0	35/126326=0	5/30778=0	4/6460=0.001	1	1	1	tolerated	0.19	probably_damaging	0.987	53	23.4
470	CM	DSP	NM_004415.3	c.3952A>G	p.(Lys1318Glu)	3		HCM	1071	2	2											1	1	1	tolerated	0.06	benign	0.007	56	21.8
471	CM	DSP	NM_004415.2	c.4019G>A	p.(Arg1340His)	3		UCM	859	3	1	rs765247380	6/276584=0	0/23960=0	0/34400=0	0/10132=0	1/18854=0	0/25786=0	3/126236=0	2/30766=0	0/6450=0	0	0	0	tolerated	0.11	benign	0.003	29	22.7
472	CM	DSP	NM_004415.2	c.4274G>A	p.(Arg1425Lys)	3		DCM	940	3	2	rs577560157	4/246164=0	0/15292=0	0/33578=0	0/9850=0	0/17248=0	0/22298=0	4/111634=0	0/30782=0	0/5482=0	3	2	2	tolerated	0.6	benign	0	26	21.7
473	CM	DSP	NM_004415.2	c.4352T>C	p.(Leu1451Pro)	3		DCM	629	1	1											-3	-3	-3	deleterious	0.02		possibly damaging	0.726	98
474	CM	DSP	NM_004415.2	c.4521A>T	p.(Leu1507Phe)	3		HCM	861	3	1											1	0	0	tolerated	0.07	possibly_damaging	0.854	22	15.13
475	CM	DSP	NM_004415.2	c.4565C>T	p.(Thr1522Met)	3		ARVC	805	3	2	rs375150075	17/275958=0	3/23844=0	10/34374=0	0/10094=0	1/18850=0	0/25780=0	3/125822=0	0/30744=0	0/6450=0	-1	-1	-1	tolerated	0.06	benign	0.096	81	10.17	17.13
476	CM	DSP	NM_004415.2	c.4901G>A	p.(Arg1634Gln)	3		ARVC	1250	2	2	rs144106775	16/275676=0	2/23832=0	1/34358=0	0/10086=0	0/18840=0	0/25770=0	5/125620=0	8/30744=0	0/6426=0	1	1	1	tolerated	0.11	benign	0.006	43	21.4
477	CM	DSP	NM_004415.2	c.4915G>A	p.(Val1639Met)	3		DCM	862	3	1	rs539587517	11/276022=0	3/23862=0	1/34356=0	0/10094=0	1/18836=0	0/25776=0	4/125920=0	2/30748=0	0/6430=0	1	1	1	tolerated	0.05	possibly_damaging	0.607	21	21.9
478	CM	DSP	NM_004415.2	c.4915G>A	p.(Val1639Met)	3		UCM	1490	2	2	rs539587517	11/276022=0	3/23862=0	1/34356=0	0/10094=0	1/18836=0	0/25776=0	4/125920=0	2/30748=0	0/6430=0	1	1	1	tolerated	0.05	possibly_damaging	0.607	21	21.9
479	CM	DSP	NM_004415.2	c.521G>T	p.(Cys174Phe)	3		HCM	865	1	1	rs377507763	24/277038=0	3/24036=0	0/34418=0	0/10146=0	0/18868=0	0/25794=0	21/126528=0	0/30782=0	0/6466=0	-2	-2	-3	deleterious	0.05	benign	0.276	205	23.7
480	CM	DSP	NM_004415.2.	c.5363A>G	p.(Gln1788Arg)	3		HCM	1064	3	3	rs139673146	15/275076=0	0/23760=0	0/34332=0	0/10138=0	0/18724=0	0/25400=0	15/125574=0	0/30718=0	0/6430=0	1	1	1	tolerated	0.06	possibly_damaging	0.823	43	25.6
481	CM	DSP	NM_004415.2	c.5801G>A	p.(Arg1934Gln)	3		HCM	432	2	2		1/245326=0	0/15206=0	0/33542=0	0/9808=0	0/17242=0	0/22298=0	1/111022=0	0/30744=0	0/5464=0	1	1	1	tolerated	0.56		benign	0.397	43
482	CM	DSP		c.6059G>C	p.(Gly2020Ala)	3		UA	293	2	2		2/246046=0	0/15268=0	0/33570=0	0/9842=0	0/17244=0	0/22300=0	2/111562=0	0/30778=0	0/5482=0	0	0	0	deleterious	0.01	probably_damaging	0.947	60	24.8
483	CM	DSP	NM_004415.2	c.6059G>C	p.(Gly2020Ala)	3		UCM	1587	3	2		2/246046=0	0/15268=0	0/33570=0	0/9842=0	0/17244=0	0/22300=0	2/111562=0	0/30778=0	0/5482=0	0	0	0	deleterious	0.01	probably_damaging	0.947	60	24.8
484	CM	DSP	NM_004415.2	c.6275C>T	p.(Ala2092Val)	3		ARVC	489	2	1	rs876657796	2/246202=0	0/15296=0	0/33580=0	0/9850=0	0/17248=0	0/22298=0	2/111666=0	0/30782=0	0/5482=0	0	0	0	deleterious	0.01		probably damaging	0.994	64
485	CM	DSP	NM_004415.2	c.6305G>T	p.(Gly2102Val)	3		HCM	757	2	2	rs572843477	2/246214=0	2/15296=0	0/33580=0	0/9850=0	0/17246=0	0/22296=0	0/111684=0	0/30782=0	0/5480=0	-3	-3	-4	deleterious	0.01	benign	0.007	109	23.4	18.40
486	CM	DSP	NM_004415.2	c.6305G>T	p.(Gly2102Val)	3		UCM	867	3	1	rs572843477	2/246214=0	2/15296=0	0/33580=0	0/9850=0	0/17246=0	0/22296=0	0/111684=0	0/30782=0	0/5480=0	-3	-3	-4	deleterious	0.01	benign	0.007	109	23.4
487	CM	DSP	NM_004415.3	c.6449C>G	p.(Ala2150Gly)	3		ARVC	829	3	2		1/246076=0	0/15270=0	0/33576=0	0/9848=0	0/17230=0	0/22270=0	1/111620=0	0/30780=0	0/5482=0	0	0	0	tolerated	0.42	benign	0.055	60	21.3	32
488	CM	DSP	NM_004415.2	c.6565C>T	p.(Arg2189Trp)	3		HCM	630	1	1	rs767661570	13/246258=0	0/15302=0	0/33582=0	0/9850=0	0/17248=0	1/22290=0	10/111720=0	1/30782=0	1/5484=0	-2	-3	-4	deleterious	0		possibly damaging	0.723	101
489	CM	DSP	NM_004415.2	c.6583C>T	p.(His2195Tyr)	3		HCM	868	3	1											2	2	2	tolerated	0.11	benign	0.439	83	23.3
490	CM	DSP	NM_004415.2	c.6881C>G	p.(Ala2294Gly)	3		ARVC	870	2	1	rs147000526	205/277244=0.001	6/24036=0	70/34420=0.002	0/10152=0	0/18870=0	5/25792=0	106/126724=0.001	7/30782=0	11/6468=0.002	0	0	0	deleterious	0.01	possibly_damaging	0.899	60	30
491	CM	DSP	NM_004415.3	c.6881C>G	p.(Ala2294Gly)	3		HCM	1013	3	3	rs147000526	205/277244=0.001	6/24036=0	70/34420=0.002	0/10152=0	0/18870=0	5/25792=0	106/126724=0.001	7/30782=0	11/6468=0.002	0	0	0	deleterious	0.01	possibly_damaging	0.899	60	30
492	CM	DSP	NM_004415.2	c.6881C>G	p.(Ala2294Gly)	3		UCM	1345	2	2	rs147000526	205/277244=0.001	6/24036=0	70/34420=0.002	0/10152=0	0/18870=0	5/25792=0	106/126724=0.001	7/30782=0	11/6468=0.002	0	0	0	deleterious	0.01	possibly_damaging	0.899	60	30
493	CM	DSP	NM_004415.3	c.7168A>G	p.(Ile2390Val)	3		HCM	1013	3	2											3	3	3	tolerated	1	benign	0	29	16.72
494	CM	DSP	NM_004415.2	c.7168A>G	p.(Ile2390Val)	3		UCM	1398	2	2											3	3	3	tolerated	1	benign	0	29	16.72
495	CM	DSP	NM_004415.2	c.7196A>G	p.(Glu2399Gly)	3		HCM	631	1	1											-2	-2	-3	deleterious	0		possibly damaging	0.458	98
496	CM	DSP	NM_004415.2	c.7435G>C	p.(Val2479Leu)	3		Conduction	871	2	1											1	1	1	deleterious	0.01	probably_damaging	0.997	32	28.9
497	CM	DSP	NM_004415.2	c.7916G>A	p.(Arg2639Gln)	3		HCM	469	2	2	rs116888866	236/276658=0.001	0/23974=0	1/34408=0	0/10132=0	215/18862=0.011	1/25790=0	10/126260=0	9/30770=0	0/6462=0	1	1	1	deleterious	0.01		probably damaging	0.978	43
498	CM	DSP	NM_004415.2	c.8231G>A	p.(Arg2744Lys)	3		DCM	882	3	2											3	2	2	deleterious	0.04	probably_damaging	0.999	26	26.3
499	CM	DSP	NM_004415.2	c.8255G>A	p.(Arg2752Gln)	3		HCM	1081	4	3	rs769706539	8/277092=0	7/24000=0	1/34418=0	0/10144=0	0/18864=0	0/25794=0	0/126630=0	0/30780=0	0/6462=0	1	1	1	tolerated	0.12	probably_damaging	0.987	43	23.2
500	CM	DSP	NM_004415.2	c.8387A>T	p.(Asp2796Val)	3		DCM	872	2	1											-3	-3	-4	deleterious	0.01	probably_damaging	0.993	152	28.5
501	CM	DSP	NM_004415.2	c.8389A>G	p.(Ile2797Val)	3		UCM	1494	3	2	rs1040353645	1/30966=0	0/8724=0	0/838=0	0/302=0	0/1622=0	0/3494=0	1/15006=0	0/0=0	0/980=0	3	3	3	tolerated	0.29	benign	0.007	29	17.01
502	CM	DSP	NM_004415.2	c.943C>T	p.(Arg315Cys)	3		HCM	875	1	1	rs200476515	31/276250=0	1/24002=0	0/34394=0	0/10150=0	14/18850=0.001	0/25092=0	15/126544=0	1/30770=0	0/6448=0	-3	-3	-4	deleterious	0.02	possibly_damaging	0.809	180	33
503	CM	DSP	NM_004415.2	c.943C>T	p.(Arg315Cys)	3		UCM	876	2	1	rs200476515	31/276250=0	1/24002=0	0/34394=0	0/10150=0	14/18850=0.001	0/25092=0	15/126544=0	1/30770=0	0/6448=0	-3	-3	-4	deleterious	0.02	possibly_damaging	0.809	180	33
504	CM	DSP	NM_004415.2	c.943C>T	p.(Arg315Cys)	3		HCM	1040	4	2	rs200476515	31/276250=0	1/24002=0	0/34394=0	0/10150=0	14/18850=0.001	0/25092=0	15/126544=0	1/30770=0	0/6448=0	-3	-3	-4	deleterious	0.02	possibly_damaging	0.809	180	33
505	CM	DSP	NM_004415.2	c.944G>A	p.(Arg315His)	3		HCM	1015	3	3	rs558825586	1/245262=0	0/15272=0	0/33556=0	0/9848=0	0/17232=0	0/21584=0	0/111530=0	1/30772=0	0/5468=0	0	0	0	deleterious	0.02	possibly_damaging	0.584	29	28.0
506	CM	EMD	NM_000117.2	c.454C>T	p.(Arg152Cys)	4		HCM	574	1	1	rs376456050	10/178558=0	1/12234=0	0/26578=0	0/7290=0	1/12867=0	0/16365=0	8/80026=0	0/19145=0	0/4053=0	-3	-3	-4	tolerated	0.05		benign	0.002	180
507	CM	EMD	NM_000117.2	c.671C>T	p.(Pro224Leu)	4		DCM	575	1	1	rs782559230	6/178244=0	0/12228=0	0/26566=0	0/7242=0	3/12859=0	0/16395=0	3/79801=0	0/19102=0	0/4051=0	-3	-3	-3	deleterious	0		probably damaging	0.997	98
508	CM	EMD	NM_000117.2	c.400G>A	p.(Val134Met)	3		HCM	825	3	2	rs201250825	1/178643=0	0/12242=0	0/26577=0	0/7288=0	0/12865=0	0/16435=0	1/80038=0	0/19143=0	0/4055=0	1	1	1	tolerated	0.16	benign	0.01	21	11.21
509	CM	EMD	NM_000117.2	c.581C>T	p.(Ser194Leu)	3		NCCM	490	2	1	rs782697057	8/178541=0	0/12238=0	0/26577=0	0/7292=0	0/12866=0	0/16307=0	0/80061=0	8/19145=0	0/4055=0	-3	-2	-3	tolerated	0.09		benign	0.001	145
510	CM	EMD	NM_000117.2	c.734T>A	p.(Phe245Tyr)	3		HCM	878	1	1											3	3	3	tolerated	0.86	benign	0.139	22	4787
511	CM	EMD	NM_000117.2	c.746A>G	p.(Glu249Gly)	3		UCM	417	4	3	rs781947413	10/198721=0	0/17793=0	0/27172=0	0/7445=0	0/13846=0	0/18993=0	10/89632=0	0/19102=0	0/4738=0	-2	-2	-3	tolerated	0.14		benign	0.007	98
512	CM	EMD	NM_000117.2	c.746A>G	p.(Glu249Gly)	3		HCM	1006	3	2	rs781947413	10/198721=0	0/17793=0	0/27172=0	0/7445=0	0/13846=0	0/18993=0	10/89632=0	0/19102=0	0/4738=0	-2	-2	-3	tolerated	0.15	benign	0.007	98	15.53
513	CM	FHL1	NM_001449.4	c.113A>G	p.(Asn38Ser)	3		DCM	879	3	1	rs886043917	1/178783=0	0/12246=0	0/26578=0	0/7292=0	0/12870=0	0/16446=0	1/80148=0	0/19145=0	0/4058=0	1	1	0	deleterious	0.05	probably_damaging	0.997	46	25.3
514	CM	FHL2	NM_201555.1	c.374C>A	p.(Thr125Asn)	3		DCM	1471	4	2	rs773356788	3/277124=0	2/24030=0	0/34400=0	0/10150=0	0/18870=0	0/25792=0	1/126644=0	0/30776=0	0/6462=0	0	0	0	tolerated	0.36	benign	0.029	65	21.7
515	CM	FHL2	NM_201555.1	c.469C>A	p.(Gln157Lys)	3		DCM	880	2	1											1	1	1	tolerated	1	benign	0.027	53	21.9
516	CM	FHL2	NM_201555.1	c.698_699delinsAA	p.(Gly233Glu)	3		NCCM	1542	3	3	rs770807726													deleterious	0.02	possibly_damaging	0.9	98	31
517	CM	FLNC	NM_001458.4	c.697C>T	p.(Gln233*)	5		DCM	882	3	1											-5	-4	-6	NA	NA	NA	NA	NA	43
518	CM	FLNC	NM_001458.4	c.1196A>T	p.(Asp399Val)	3		NCCM	1516	6	2											-3	-3	-4	deleterious	0.02	possibly_damaging	0.794	152	29.7
519	CM	FLNC	NM_001458.4	c.1474A>G	p.(Lys492Glu)	3		DCM	1533	1	1	rs118056738	74/277128=0	0/24020=0	0/34416=0	0/10150=0	0/18866=0	2/25756=0	62/126680=0	9/30782=0	1/6458=0	1	1	1	deleterious	0.04	benign	0.388	56	24.6
520	CM	FLNC	NM_001458.4	c.1513G>A	p.(Gly505Ser)	3		DCM	1538	4	1	rs200935123	4/246124=0	0/15284=0	0/33580=0	0/9848=0	0/17246=0	0/22236=0	2/111672=0	2/30782=0	0/5476=0	0	0	-1	deleterious	0	probably_damaging	0.966	56	32
521	CM	FLNC	NM_001458.4	c.2120A>G	p.(Gln707Arg)	3		UCM	1562	3	1		1/246242=0	0/15296=0	0/33582=0	0/9848=0	0/17248=0	0/22298=0	1/111708=0	0/30782=0	0/5480=0	1	1	1	deleterious	0.02	probably_damaging	0.953	43	34
522	CM	FLNC	NM_001458.4	c.449A>G	p.(Asp150Gly)	3		HCM	1531	3	2	rs760711912	8/246088=0	0/15300=0	0/33582=0	0/9850=0	0/17248=0	0/22300=0	8/111548=0	0/30782=0	0/5478=0	-1	-1	-2	tolerated	0.3	benign	0.046	94	23.2
523	CM	FLNC	NM_001458.4	c.449A>G	p.(Asp150Gly)	3		ARVC	1597	2	1	rs760711912	8/246088=0	0/15300=0	0/33582=0	0/9850=0	0/17248=0	0/22300=0	8/111548=0	0/30782=0	0/5478=0	-1	-1	-2	tolerated	0.3	benign	0.046	94	23.2
524	CM	FLNC	NM_001458.4	c.4583C>G	p.(Pro1528Arg)	3		HCM	1551	2	2		2/245896=0	0/15282=0	0/33572=0	0/9842=0	0/17248=0	0/22098=0	2/111602=0	0/30782=0	0/5470=0	-2	-2	-2	deleterious	0	probably_damaging	1	103	25.4
525	CM	FLNC	NM_001458.4	c.4811C>T	p.(Pro1604Leu)	3		HCM	1253	3	2	rs778021239	1/245194=0	0/15258=0	0/33554=0	0/9806=0	1/17236=0	0/22268=0	0/110824=0	0/30780=0	0/5468=0	-3	-3	-3	deleterious	0	probably_damaging	1	98	29.4
526	CM	FLNC	NM_001458.4	c.5071G>A	p.(Asp1691Asn)	3		HCM	1605	1	1	rs777061037	18/277162=0	0/24026=0	0/34420=0	0/10150=0	2/18866=0	5/25776=0	11/126682=0	0/30782=0	0/6460=0	2	1	1	deleterious	0.05	possibly_damaging	0.862	23	27.0
527	CM	FLNC	NM_001458.4	c.5311C>G	p.(Pro1771Ala)	3		DCM	1231	5	2	rs200001272	74/277058=0	3/24016=0	0/34418=0	0/10144=0	0/18870=0	6/25794=0	65/126574=0.001	0/30782=0	0/6460=0	-1	-1	-1	tolerated	0.27	benign	0	27	22.6
528	CM	FLNC	NM_001458.4	c.6559C>T	p.(Arg2187Cys)	3		ARVC	1517	3	3	rs747336635	2/244448=0	0/14986=0	0/33558=0	0/9802=0	0/17202=0	0/22202=0	2/110486=0	0/30770=0	0/5442=0	-3	-3	-4	tolerated	0.07	possibly_damaging	0.759	180	26.0
529	CM	FLNC	NM_001458.4	c.6877C>T	p.(Arg2293Cys)	3		DCM	881	1	1	rs571239463	3/232462=0	0/13930=0	0/32218=0	0/9530=0	0/16484=0	1/20734=0	1/104794=0	1/29592=0	0/5180=0	-3	-3	-4	deleterious	0.02	benign	0.117	180	25.2
530	AR	GJA5	NM_005266.5	c.286G>T	p.(Ala96Ser)	3		UA	221	1	1	rs121434557	33/276868=0	0/24026=0	0/34416=0	0/10136=0	0/18864=0	2/25788=0	31/126400=0	0/30776=0	0/6462=0	1	1	1	deleterious	0.01	probably_damaging	0.978	99	25.7	23.9
531	AR	GJA5	NM_005266.5	c.286G>T	p.(Ala96Ser)	4	3 (more patients/families)	UA	48	1	1	rs121434557	33/276868=0	0/24026=0	0/34416=0	0/10136=0	0/18864=0	2/25788=0	31/126400=0	0/30776=0	0/6462=0	1	1	1	deleterious	0.02	probably damaging	0.999	99	28.6
532	AR	GJA5	NM_005266.5	c.286G>T	p.(Ala96Ser)	4	3 (more patients/families)	UA	219	2	1	rs121434557	33/276868=0	0/24026=0	0/34416=0	0/10136=0	0/18864=0	2/25788=0	31/126400=0	0/30776=0	0/6462=0	1	1	1	deleterious	0.01	probably_damaging	0.978	99	25.7	28.9
533	AR	GJA5	NM_005266.5	c.286G>T	p.(Ala96Ser)	4	3 (more patients/families)	LQTS	257	2	2	rs121434557	33/276868=0	0/24026=0	0/34416=0	0/10136=0	0/18864=0	2/25788=0	31/126400=0	0/30776=0	0/6462=0	1	1	1	deleterious	0.01	probably_damaging	0.978	99	25.7
534	AR	GJA5	NM_005266.5	c.286G>T	p.(Ala96Ser)	4	3 (more patients/families)	BRS	220	1	1	rs121434557	33/276868=0	0/24026=0	0/34416=0	0/10136=0	0/18864=0	2/25788=0	31/126400=0	0/30776=0	0/6462=0	1	1	1	deleterious	0.01	probably_damaging	0.978	99	25.7	25.8
535	AR	GJA5	NM_005266.5	c.(?_-20)_(*20_?)dup	p.?	3		UA	342	2	2														NA	NA	NA	NA	NA
536	AR	GJA5	NM_005266.6	c.973A>C	p.(Asn325His)	3		AF	372	4	3	rs782592443	18/277150=0	0/24026=0	4/34418=0	0/10150=0	0/18858=0	0/25792=0	13/126656=0	0/30782=0	1/6468=0	1	1	0	tolerated	0.09	benign	0.006	68	14.50
537	CM	GLA	NM_000169.2	c.996_999del	p.(Gln333Glufs*14)	5		HCM	1623	1	1	rs781884596													NA	NA	NA	NA	NA	35
538	CM	GLA	NM_000169.2	c.1076T>C	p.(Ile359Thr)	3		DCM	883	1	1											-1	-1	-1	tolerated	0.35	benign	0.313	89	15.07
539	CM	GLA	NM_000169.2	c.1153A>G	p.(Thr385Ala)	3		UCM	491	2	1	rs397515869	101/200580=0.001	0/18210=0	0/27195=0	0/7483=0	0/13924=0	0/19106=0	1/90735=0	99/19145=0.005	1/4782=0	0	0	0	tolerated	0.45		benign	0.196	58
540	CM	GLA	NM_000169.2	c.1153A>G	p.(Thr385Ala)	3		DCM	633	1	1	rs397515869	101/200580=0.001	0/18210=0	0/27195=0	0/7483=0	0/13924=0	0/19106=0	1/90735=0	99/19145=0.005	1/4782=0	0	0	0	tolerated	0.45		benign	0.196	58
541	CM	GLA	NM_000169.2	c.1153A>G	p.(Thr385Ala)	3		DCM	634	1	1	rs397515869	101/200580=0.001	0/18210=0	0/27195=0	0/7483=0	0/13924=0	0/19106=0	1/90735=0	99/19145=0.005	1/4782=0	0	0	0	tolerated	0.45		benign	0.196	58
542	CM	GLA	NM_000169.2	c.427G>A	p.(Ala143Thr)	3		DCM	632	1	1	rs104894845	101/200452=0.001	3/18142=0	10/27197=0	1/7479=0	0/13899=0	1/19106=0	85/90713=0.001	0/19141=0	1/4775=0	0	0	0	deleterious	0.02		possibly damaging	0.853	58
543	CM	GLA	NM_000169.2	c.436C>T	p.(Pro146Ser)	3		UCM	1576	2	2	rs104894837										-1	-1	-1	deleterious	0	probably_damaging	1	74	27.6
544	CM	GLA	NM_000169.2	c.659G>A	p.(Arg220Gln)	3		UCM	884	1	1	rs869312378										1	1	1	tolerated	0.55	benign	0.017	43	21.9
545	AR	GPD1L	NM_015141.3	c.370A>G	p.(Ile124Val)	3		(A)SCD	50	1	1	rs72552293	801/277070=0.003	1/24024=0	6/34414=0	10/10148=0.001	0/18868=0	416/25788=0.016	349/126582=0.003	2/30782=0	17/6464=0.003	3	3	3	tolerated	1	benign	0	29	3.807
546	AR	GPD1L	NM_015141.3	c.247G>A	p.(Glu83Lys)	3		BRS	49	1	1	rs72552292	49/276986=0	0/24026=0	3/34410=0	0/10150=0	0/18868=0	0/25784=0	40/126500=0	2/30782=0	4/6466=0.001	1	1	1	tolerated	0.18	benign	0.008	56	23.1
547	AR	GPD1L	NM_015141.3	c.247G>A	p.(Glu83Lys)	3		BRS	121	2	2	rs72552292	49/276986=0	0/24026=0	3/34410=0	0/10150=0	0/18868=0	0/25784=0	40/126500=0	2/30782=0	4/6466=0.001	1	1	1	tolerated	0.18	benign	0.057	56	22.4
548	AR	GPD1L	NM_015141.3	c.372A>G	p.(Ile124Met)	3		Other indication	51	1	1	rs182826539	14/277068=0	0/24020=0	1/34416=0	0/10150=0	0/18868=0	0/25788=0	3/126578=0	10/30782=0	0/6466=0	2	1	1	tolerated	0.2	benign	0.005	10	19.33
549	AR	GPD1L	NM_015141.3	c.775G>A	p.(Gly259Arg)	3		LQTS	172	3	3	rs146477959	3/245762=0	0/15284=0	0/33582=0	0/9842=0	0/17240=0	0/22300=0	2/111260=0	0/30780=0	1/5474=0	-2	-2	-3	deleterious	0	probably_damaging	1	125	32
550	AR	GPD1L	NM_015141.3	c.917_918delinsGG	p.(Ala306Gly)	3		BRS	376	3	2	rs980454260													tolerated	0.24	benign	0.194	60	15.41
551	AR	GPD1L	NM_015141.3	c.960del	p.(Lys320Asnfs*80)	3		UA	270	3	3														NA	NA	NA	NA	NA	23.9
552	AR	GPD1L	NM_015141.3	c.658C>T	p.(Arg220Cys)	3		UA	162	1	1	rs72546647	8/275926=0	0/24032=0	1/34418=0	0/10136=0	0/18862=0	0/25788=0	6/125454=0	1/30782=0	0/6454=0	-3	-3	-4	deleterious	0.05	benign	0.003	180	18.48
553	AR	GPD1L	NM_015141.3	c.658C>T	p.(Arg220Cys)	3		UA	163	1	1	rs72546647	8/275926=0	0/24032=0	1/34418=0	0/10136=0	0/18862=0	0/25788=0	6/125454=0	1/30782=0	0/6454=0	-3	-3	-4	deleterious	0.05	benign	0.003	180	18.48
554	AR	GPD1L	NM_015141.3	c.817C>T	p.(Arg273Cys)	3		UA	164	1	1	rs72552294	12/244220=0	0/15202=0	0/33574=0	0/9820=0	0/17230=0	0/22298=0	12/109858=0	0/30782=0	0/5456=0	-3	-3	-4	deleterious	0	possibly_damaging	0.896	180	33
555	AR	GPD1L	NM_015141.3	c.499A>G	p.(Thr167Ala)	3		ARVC	161	1	1											0	0	0	deleterious	0	possibly_damaging	0.749	58	26.0
556	both	HCN4	NM_005477.2	c.1441T>C	p.(Tyr481His)	5		UA	225	1	1	rs1057519275										2	2	2	deleterious	0	probably_damaging	0.999	83	24.9	NA
557	both	HCN4	NM_005477.2	c.1132C>T	p.(Arg378Cys)	3		NCCM	226	2	1	rs758468167	5/246230=0	0/15304=0	0/33580=0	0/9848=0	1/17244=0	3/22296=0	1/111694=0	0/30780=0	0/5484=0	-3	-3	-4	deleterious	0	probably_damaging	0.999	180	33	NA
558	both	HCN4	NM_005477.2	c.3065G>A	p.(Arg1022Gln)	3		BRS	227	1	1		1/111262=0	0/8688=0	0/16572=0	0/2118=0	0/11686=0	0/9232=0	1/49720=0	0/10894=0	0/2352=0	1	1	1	tolerated	0.38	benign	0.001	43	16.39	9.063
559	both	HCN4	NM_005477.2	c.458A>G	p.(Glu153Gly)	3		CPVT	229	2	1	rs560874115	36/30638=0.001	4/8516=0	0/692=0	1/298=0.003	0/1616=0	0/2804=0	31/15734=0.002	0/40=0	0/938=0	-2	-2	-3	tolerated	0.14	benign	0	98	16.19	0.078
560	both	HCN4	NM_005477.2	c.1471G>A	p.(Asp491Asn)	5		NCCM	885	1	1											2	1	1	deleterious	0	probably_damaging	0.999	23	29.2
561	both	HCN4	NM_005477.2	c.1471G>A	p.(Asp491Asn)	5		NCCM	887	1	1											2	1	1	deleterious	0	probably_damaging	0.999	23	29.2
562	both	HCN4	NM_005477.2	c.1471G>A	p.(Asp491Asn)	3	5 (cosegregation)	NCCM	886	1	1											2	1	1	deleterious	0	probably_damaging	0.999	23	29.2
563	both	HCN4	NM_005477.2	c.1471G>A	p.(Asp491Asn)	3	5 (cosegregation)	UA	224	1	1											2	1	1	deleterious	0	probably_damaging	0.999	23	29.2	41
564	both	HCN4	NM_005477.2	c.1636G>A	p.(Asp546Asn)	3		UCM	888	3	1	rs370884239	15/277194=0	0/24034=0	0/34416=0	0/10150=0	0/18868=0	0/25792=0	15/126688=0	0/30782=0	0/6464=0	2	1	1	deleterious	0.02	benign	0.43	23	24.5
565	both	HCN4	NM_005477.2	c.196G>C	p.(Glu66Gln)	3		UCM	1314	3	2	rs786205803										2	2	2	tolerated	0.09	benign	0.146	29	19.61
566	both	HCN4	NM_005477.2	c.2140dupA	p.(Ile714Asnfs*27)	3		LQTS	223	1	1														NA	NA	NA	NA	NA	33	24.3
567	both	HCN4	NM_005477.2	c.2260C>T	p.(His754Tyr)	3		LQTS	222	1	1											2	2	2	deleterious	0	benign	0.006	83	21.1	34
568	both	HCN4	NM_005477.2	c.2327C>T	p.(Pro776Leu)	3		LQTS	232	3	2	rs1008825259	1/270728=0	0/23876=0	0/34332=0	0/9932=0	0/18832=0	0/22434=0	1/124316=0	0/30632=0	0/6374=0	-3	-3	-3	deleterious	0	probably_damaging	0.997	98	26.2	NA
569	both	HCN4	NM_005477.2	c.2537C>T	p.(Pro846Leu)	3		UA	401	3	2	rs747467877	25/262020=0	1/23630=0	1/34280=0	0/10008=0	1/18708=0	1/16792=0	8/121612=0	13/30704=0	0/6286=0	-3	-3	-3	deleterious	0.03	benign	0.397	98	23.2
570	both	HCN4	NM_005477.2	c.2555C>T	p.(Pro852Leu)	3		ARVC	805	3	3	rs779241036	2/230894=0	0/14886=0	0/33422=0	0/9702=0	0/17066=0	0/13338=0	1/106494=0	1/30692=0	0/5294=0	-3	-3	-3	deleterious	0.03	possibly_damaging	0.766	98	24.5
571	both	HCN4	NM_005477.2	c.2669C>T	p.(Pro890Leu)	3		DCM	952	2	2	rs758929649	7/258264=0	0/22434=0	0/33498=0	0/9668=0	0/18194=0	1/23442=0	6/114710=0	0/30244=0	0/6074=0	-3	-3	-3	tolerated	0.2	benign	0.029	98	14.08
572	both	HCN4	NM_005477.2	c.2800C>T	p.(Arg934Cys)	3		HCM	1149	5	4	rs199638465	52/174138=0	26/16998=0.002	6/23924=0	0/6588=0	0/13594=0	0/17122=0	6/71238=0	14/20130=0.001	0/4544=0	-3	-3	-4	deleterious	0	possibly_damaging	0.586	180	25.2
573	both	HCN4	NM_005477.2	c.2917G>A	p.(Gly973Arg)	3		DCM	889	3	1	rs200495478	17/203462=0	0/20096=0	1/26244=0	0/5708=0	0/16492=0	0/18896=0	15/91812=0	1/19602=0	0/4612=0	-2	-2	-3	tolerated	0.06	benign	0.04	125	17.59
574	both	HCN4	NM_005477.2	c.2938G>A	p.(Gly980Arg)	3		BRS	134	4	4	rs780719805	4/221744=0	3/20370=0	1/28600=0	0/7318=0	0/16796=0	0/20884=0	0/98708=0	0/23924=0	0/5144=0	-2	-2	-3	tolerated	0.06	possibly_damaging	0.886	125	23.2
575	both	HCN4	NM_005477.2	c.3064C>T	p.(Arg1022*)	3		DCM	1242	2	2	rs762950777	3/145774=0	1/17576=0	0/17706=0	0/2488=0	0/13532=0	0/13262=0	2/66612=0	0/11202=0	0/3396=0	-5	-4	-6	NA	NA	NA	NA	NA	37
576	both	HCN4	NM_005477.2	c.3209G>A	p.(Gly1070Asp)	3		DCM	1173	2	2	rs772839442	2/110712=0	0/16386=0	0/12930=0	0/1810=0	0/12214=0	0/7906=0	2/48378=0	0/8190=0	0/2898=0	-1	-1	-2	tolerated	0.09	benign	0.017	94	15.44
577	both	HCN4	NM_005477.2	c.3365C>A	p.(Ala1122Asp)	3		HCM	965	3	2											-2	-2	-2	deleterious	0.04	benign	0.1	126	14.27
578	both	HCN4	NM_005477.2	c.3452C>G	p.(Thr1151Ser)	3		HCM	890	3	1											2	1	1	deleterious	0.01	benign	0.001	58	15.46
579	both	HCN4	NM_005477.2	c.3501G>C	p.(Asp349Asn)	3		DCM	1229	2	2	rs756960444										1	0	0	tolerated	0.18	benign	0.202	22	14.85
580	both	HCN4	NM_005477.2	c.352_3505del	p.(Phe1168Glyfs*12)	3		AF	372	4	2		5/30942=0	2/8728=0	0/838=0	0/302=0	0/1622=0	0/3492=0	3/14978=0	0/0=0	0/982=0				NA	NA	NA	NA	NA	32
581	both	HCN4	NM_005477.2	c.458A>G	p.(Glu153Gly)	3		UA	126	2	2	rs560874115	36/30638=0.001	4/8516=0	0/692=0	1/298=0.003	0/1616=0	0/2804=0	31/15734=0.002	0/40=0	0/938=0	-2	-2	-3	tolerated	0.14	benign	0	98	16.19
582	both	HCN4	NM_005477.2	c.458A>G	p.(Glu153Gly)	3		DCM	857	2	2	rs560874115	36/30638=0.001	4/8516=0	0/692=0	1/298=0.003	0/1616=0	0/2804=0	31/15734=0.002	0/40=0	0/938=0	-2	-2	-3	tolerated	0.14	benign	0	98	16.19
583	both	HCN4	NM_005477.2	c.458A>G	p.(Glu153Gly)	3		ARVC	891	1	1	rs560874115	36/30638=0.001	4/8516=0	0/692=0	1/298=0.003	0/1616=0	0/2804=0	31/15734=0.002	0/40=0	0/938=0	-2	-2	-3	tolerated	0.14	benign	0	98	16.19
584	both	HCN4	NM_005477.2	c.458A>G	p.(Glu153Gly)	3		HCM	1267	2	2	rs560874115	36/30638=0.001	4/8516=0	0/692=0	1/298=0.003	0/1616=0	0/2804=0	31/15734=0.002	0/40=0	0/938=0	-2	-2	-3	tolerated	0.14	benign	0	98	16.19
585	both	HCN4	NM_005477.2	c.458A>G	p.(Glu153Gly)	3		DCM	1591	2	2	rs560874115	36/30638=0.001	4/8516=0	0/692=0	1/298=0.003	0/1616=0	0/2804=0	31/15734=0.002	0/40=0	0/938=0	-2	-2	-3	tolerated	0.14	benign	0	98	16.19
586	both	JPH2	NM_020433.4	c.572C>G	p.(Pro191Arg)	3		UA	2	2	2	rs554853074	46/87194=0.001	0/9492=0	6/11746=0.001	26/3460=0.008	0/5928=0	0/6202=0	7/38766=0	5/9034=0.001	2/2566=0.001	-2	-2	-2	tolerated	0.45	possibly damaging	0.497	103	8.393
587	both	JPH2	NM_020433.4	c.764C>T	p.(Ser255Leu)	3		BRS	11	2	2											-3	-2	-3	tolerated	0.14	probably damaging	1	145	25.9
588	both	JPH2	NM_020433.4	c.426_427del	p.(Val143Thrfs*98)homozygous	5		DCM	418	3	1											NA	NA	NA	NA	NA		NA	NA	NA
589	both	JPH2	NM_010433.4	c.1054C>T	p.(Arg352Cys)	3		LQTS	232	3	1											-3	-3	-4	deleterious	0	possibly_damaging	0.644	180	26.0	26.5
590	both	JPH2	NM_020433.4	c.1069C>T	p.(Leu357Phe)	3		HCM	998	4	4	rs900136335										1	0	0	deleterious	0	possibly_damaging	0.757	22	25.5
591	both	JPH2	NM_020433.4	c.1180G>A	p.(Ala394Thr)	3		HCM	1522	7	1	rs372515066	4/273902=0	0/24014=0	0/34412=0	0/10148=0	0/18848=0	0/22636=0	2/126624=0	1/30780=0	1/6440=0	0	0	0	deleterious	0	possibly_damaging	0.797	58	26.0
592	both	JPH2	NM_020433.4	c.1213G>T	p.(Ala405Ser)	3		DCM	944	2	2	rs557878787	4/275822=0	0/24026=0	0/34416=0	0/10150=0	0/18868=0	0/24450=0	4/126678=0	0/30782=0	0/6452=0	1	1	1	tolerated	0.07	probably_damaging	0.998	99	23.7
593	both	JPH2	NM_010433.4	c.128A>G	p.(Asn43Ser)	3		LQTS	263	3	3	rs138992849	55/276850=0	45/24014=0.002	7/34410=0	0/10142=0	0/18868=0	0/25696=0	1/126486=0	1/30780=0	1/6454=0	1	1	0	tolerated	0.79	possibly_damaging	0.839	46	22.6
594	both	JPH2	NM_020433.4	c.128A>G	p.(Asn43Ser)	3		BRS	309	3	2	rs138992849	55/276850=0	45/24014=0.002	7/34410=0	0/10142=0	0/18868=0	0/25696=0	1/126486=0	1/30780=0	1/6454=0	1	1	0	tolerated	0.79	possibly_damaging	0.839	46	22.6
595	both	JPH2	NM_020433.4	c.1454C>T	p.(Pro485Leu)	3		UCM	892	2	1		0/18082=0	0/246=0	0/2864=0	0/518=0	0/1912=0	0/1388=0	0/8478=0	0/2124=0	0/552=0	-3	-3	-3	deleterious	0.01	probably_damaging	0.998	98	23.0
596	both	JPH2	NM_020433.4	c.1570G>A	p.(Val524Ile)	3		DCM	1540	2	1											3	3	3	tolerated	0.39	benign	0.007	29	5939
597	both	JPH2	NM_020433.4	c.1714C>T	p.(Arg572Cys)	3		UCM	964	3	3	rs377366285	15/173900=0	1/9372=0	2/28462=0	0/8578=0	1/13884=0	0/8326=0	9/74112=0	2/26904=0	0/4262=0	-3	-3	-4	deleterious	0	probably_damaging	0.94	180	24.7
598	both	JPH2	NM_020433.4	c.1780T>A	p.(Ser594Thr)	3		UA	102	2	2	rs774773499										2	1	1	tolerated	0.53	benign	0.084	58	11.61
599	both	JPH2	NM_020433.4	c.1808C>T	p.(Pro603Leu)	3		DCM	893	1	1	rs199845988	20/235486=0	16/20694=0.001	2/32614=0	0/9192=0	0/17734=0	1/14482=0	1/105882=0	0/29170=0	0/5718=0	-3	-3	-3	tolerated	0.12	benign	0.005	98	13.06
600	both	JPH2	NM_020433.4	c.2001_2006dup	p.(Val668_Glu669dup)	3		DCM	894	2	1														NA	NA	NA	NA	NA	16.79
601	both	JPH2	NM_020433.4	c.2001_2006dup	p.(Val668_Glu669dup)	3		NCCM	895	1	1														NA	NA	NA	NA	NA	16.79
602	both	JPH2	NM_020433.4	c.379+1G>A	p.?	3		HCM	1270	3	3														NA	NA	NA	NA	NA	33
603	both	JPH2	NM_020433.4	c.38C>T	p.(Ala13Val)	3		NCCM	426	3	3		0/233218=0	0/14786=0	0/33346=0	0/9646=0	0/17058=0	0/15204=0	0/107242=0	0/30628=0	0/5308=0	0	0	0	deleterious	0.02		possibly damaging	0.778	64
604	both	JPH2	NM_020433.4	c.50G>T	p.(Gly17Val)	3		DCM	1175	4	3											-3	-3	-4	deleterious	0	probably_damaging	1	109	27.0
605	both	JPH2	NM_020433.4	c.535T>G	p.(Ser179Ala)	3		HCM	896	2	1											1	1	1	tolerated	0.86	benign	0.045	99	14.60
606	both	JPH2	NM_020433.4	c.565G>A	p.(Ala189Thr)	3		UCM	897	2	1	rs730880254	94/114392=0.001	0/10258=0	0/18256=0	0/5158=0	0/8116=0	83/7398=0.011	9/47646=0	0/14118=0	2/3442=0.001	0	0	0	tolerated	0.87	benign	0	58	1463
607	both	JPH2	NM_020433.4	c.572C>G	p.(Pro191Arg)	3		NCCM	635	1	1	rs554853074	46/87194=0.001	0/9492=0	6/11746=0.001	26/3460=0.008	0/5928=0	0/6202=0	7/38766=0	5/9034=0.001	2/2566=0.001	-2	-2	-2	tolerated	0.45		benign	0.067	103
608	both	JPH2	NM_020433.4	c.572C>G	p.(Pro191Arg)	3		HCM	898	1	1	rs554853074	46/87194=0.001	0/9492=0	6/11746=0.001	26/3460=0.008	0/5928=0	0/6202=0	7/38766=0	5/9034=0.001	2/2566=0.001	-2	-2	-2	tolerated	0.26	benign	0.067	103	16.43
609	both	JPH2	NM_020433.4	c.637C>T	p.(Arg213Trp)	3		HCM	428	4	4	rs767328866	64/80304=0.001	54/9250=0.006	3/7896=0	0/3726=0	0/4434=0	0/6306=0	2/36712=0	4/9542=0	1/2438=0	-2	-3	-4	deleterious	0.02		benign	0.446	101
610	both	JPH2	NM_020433.4	c.637C>T	p.(Arg213Trp)	3		HCM	861	3	2	rs767328866	64/80304=0.001	54/9250=0.006	3/7896=0	0/3726=0	0/4434=0	0/6306=0	2/36712=0	4/9542=0	1/2438=0	-2	-3	-4	deleterious	0.03	possibly_damaging	0.446	101	23.0
611	both	JPH2	NM_020433.4	c.661T>C	p.(Phe221Leu)	3		HCM	429	3	3	rs558770240	251/129872=0.002	229/11034=0.021	19/19894=0.001	0/6814=0	0/8554=0	0/8042=0	2/53032=0	0/18662=0	1/3840=0	1	0	0	tolerated	0.06		possibly damaging	0.714	22
612	both	JPH2	NM_020433.4	c.661T>C	p.(Phe221Leu)	3		HCM	636	1	1	rs558770240	251/129872=0.002	229/11034=0.021	19/19894=0.001	0/6814=0	0/8554=0	0/8042=0	2/53032=0	0/18662=0	1/3840=0	1	0	0	tolerated	0.06		possibly damaging	0.714	22
613	both	JPH2	NM_020433.4	c.692G>A	p.(Arg231Gln)	3		RCM	899	1	1	rs761591158	39/154088=0	3/14620=0	7/24294=0	0/8042=0	0/11426=0	0/8586=0	29/60248=0	0/22432=0	0/4440=0	1	1	1	tolerated	0.09	benign	0.194	43	21.0
614	both	JPH2	NM_020433.4	c.847A>G	p.(Ile283Val)	3		Myopathy	900	1	1											3	3	3	tolerated	0.74	benign	0.28	29	15.28
615	both	JPH2	NM_020433.4	c.8G>A	p.(Gly3Glu)	3		UA	146	2	2	rs746138065	8/260214=0	0/23344=0	0/34200=0	0/9934=0	0/18624=0	0/16498=0	8/120734=0	0/30634=0	0/6246=0	-2	-2	-3	deleterious	0	probably_damaging	0.999	98	23.8
616	both	JPH2	NM_020433.4	c.997G>A	p.(Asp333Asn)	3		DCM	637	1	1	rs750791531	2/242822=0	0/14884=0	0/33476=0	0/9788=0	0/17144=0	0/21238=0	2/110148=0	0/30756=0	0/5388=0	2	1	1	deleterious	0.02		benign	0.446	23
617	CM	JUP	NM_002230.2	c.1039G>A	p.(Ala347Thr)	3		DCM	901	1	1	rs782301706	6/277088=0	0/24032=0	0/34418=0	0/10140=0	0/18870=0	0/25784=0	5/126602=0	0/30782=0	1/6460=0	0	0	0	deleterious	0	probably_damaging	0.982	58	33
618	CM	JUP	NM_002230.2	c.1331G>A	p.(Arg444His)	3		HCM	1021	3	2	rs369507567	6/277164=0	0/24026=0	0/34416=0	0/10150=0	3/18868=0	1/25788=0	1/126672=0	0/30782=0	1/6462=0	0	0	0	tolerated	0.27	benign	0.037	29	23.3
619	CM	JUP	NM_002230.2	c.1366G>A	p.(Val456Ile)	3		DCM	1309	3	2	rs78437817	80/277054=0	0/24022=0	4/34420=0	1/10148=0	0/18866=0	6/25774=0	65/126578=0.001	0/30782=0	4/6464=0.001	3	3	3	tolerated	0.4	benign	0.019	29	10.61
620	CM	JUP	NM_002230.2	c.1497G>C	p.(Lys499Asn)	3		UCM	902	2	1											0	0	0	deleterious	0	probably_damaging	0.998	94	35
621	CM	JUP	NM_002230.2	c.1507G>A	p.(Gly503Ser)	3		DCM	1249	3	3	rs376051686	31/273628=0	18/23840=0.001	0/34172=0	0/10000=0	0/18814=0	0/24678=0	1/125346=0	12/30386=0	0/6392=0	0	0	-1	deleterious	0.02	probably_damaging	0.999	56	28.8
622	CM	JUP	NM_002230.2	c.1582G>A	p.(Val528Ile)	3		HCM	903	1	1	rs368271628	19/270512=0	14/23412=0.001	3/33926=0	0/9996=0	0/18690=0	0/24274=0	2/123732=0	0/30172=0	0/6310=0	3	3	3	tolerated	0.26	benign	0.04	29	20.3
623	CM	JUP	NM_002230.2	c.1666A>G	p.(Met556Val)	3		HCM	904	2	1											1	1	1	tolerated	0.05	probably_damaging	0.997	21	24.8
624	CM	JUP	NM_002230.2	c.1730G>A	p.(Arg577His)	3		NCCM	1402	2	2	rs373434456	2/246140=0	0/15294=0	0/33582=0	0/9844=0	0/17248=0	0/22274=0	2/111634=0	0/30782=0	0/5482=0	0	0	0	deleterious	0	probably_damaging	1	29	33
625	CM	JUP	NM_002230.2	c.1745G>A	p.(Arg582Gln)	3		DCM	639	1	1	rs781828085										1	1	1	tolerated	0.69		benign	0.002	43
626	CM	JUP	NM_002230.2	c.1882G>A	p.(Ala628Thr)	3		UCM	1494	3	3	rs199895459	58/265194=0	6/23830=0	0/33156=0	0/8916=0	1/18576=0	1/24976=0	48/121022=0	2/28620=0	0/6098=0	2	1	1	deleterious	0.02	possibly_damaging	0.549	23	26.6
627	CM	JUP	NM_002230.2	c.1910G>A	p.(Arg637His)	3		ARVC	1156	4	2	rs142095597	27/274182=0	24/23758=0.001	0/34252=0	0/10120=0	0/18758=0	0/25356=0	2/124874=0	0/30668=0	1/6396=0	0	0	0	deleterious	0.03	benign	0.041	29	22.1
628	CM	JUP	NM_002230.2	c.1987C>T	p.(Arg663Cys)	3		HCM	423	3	2	rs782138974	2/246272=0	0/15304=0	0/33582=0	0/9850=0	1/17248=0	0/22300=0	0/111720=0	1/30782=0	0/5486=0	-3	-3	-4	deleterious	0.04		benign	0.234	180
629	CM	JUP	NM_002230.2	c.209-3del	p.?	3		UCM	905	2	1	rs560947371	3/229628=0	0/14224=0	0/32298=0	0/9302=0	0/16494=0	0/19610=0	3/103642=0	0/28942=0	0/5116=0				NA	NA	NA	NA	NA	8877
630	CM	JUP	NM_002230.2	c.296C>T	p.(Ser99Leu)	3		UCM	1576	2	1	rs554046226	6/226510=0	0/13762=0	0/31280=0	0/9296=0	0/16010=0	0/19940=0	1/102480=0	4/28666=0	1/5076=0	-3	-2	-3	tolerated	0.3	benign	0.011	145	21.8
631	CM	JUP	NM_002230.2	c.412G>A	p.(Glu138Lys)	3		DCM	906	1	1	rs150245906	9/272734=0	2/23542=0	0/34204=0	0/10072=0	0/18778=0	0/24852=0	7/124504=0	0/30414=0	0/6368=0	1	1	1	deleterious	0.01	possibly_damaging	0.764	56	28.4
632	CM	JUP	NM_002230.2	c.460G>A	p.(Glu154Lys)	3		HCM	638	1	1	rs782765314	10/269842=0	3/23338=0	0/34088=0	0/9980=0	0/18706=0	0/24294=0	7/122816=0	0/30276=0	0/6344=0	1	1	1	tolerated	0.14		benign	0.203	56
633	CM	JUP	NM_002230.2	c.746C>T	p.(Thr249Met)	3		DCM	907	3	1	rs377612199	4/276608=0	1/24014=0	0/34416=0	0/10148=0	0/18862=0	0/25462=0	3/126474=0	0/30778=0	0/6454=0	-1	-1	-1	deleterious	0	probably_damaging	1	81	29.3
634	AR	KCNA5	NM_002234.3	c.754A>C	p.(Ile252Leu)	3		UA	52	1	1											2	2	1	tolerated	0.16	benign	0	5	12.88
635	AR	KCNA5	NM_002234.3	c.341C>A	p.(Thr114Lys)	3		CPVT	165	1	1		1/242776=0	0/14936=0	0/33492=0	0/9664=0	0/17174=0	0/21956=0	1/109556=0	0/30582=0	0/5416=0	-1	-1	-1	tolerated	0.72	benign	0.003	78	13.45
636	AR	KCND3	NM_004980.4	c.1348C>T	p.(Leu450Phe)	3		UA	167	2	1	rs150401343	36/273382=0	0/23746=0	2/34142=0	7/10048=0.001	0/18740=0	0/25426=0	16/125164=0	4/29694=0	7/6422=0.001	1	0	0	tolerated	0.24	benign	0.049	22	22.4
637	AR	KCND3	NM_004980.4	c.1525G>A	p.(Glu509Lys)	3		UA	168	2	1	rs760468985	2/245812=0	0/15302=0	0/33582=0	0/9844=0	0/17248=0	0/22298=0	2/111276=0	0/30782=0	0/5480=0	1	1	1	deleterious	0.01	possibly_damaging	0.719	56	29.4
638	AR	KCND3	NM_004980.4	c.1630A>G	p.(Thr544Ala)	3		UA	166	1	1											0	0	0	tolerated	0.14	benign	0.102	58	22.4
639	AR	KCND3	NM_004980.4	c.500A>C	p.(Gln167Pro)	3		UA	169	1	1											-1	-1	-2	deleterious	0	benign	0.24	76	24.1
640	AR	KCND3	NM_004980.4	c.5C>A	p.(Ala2Glu)	3		BRS	171	1	1	rs201340369	129/258510=0	4/22290=0	10/34054=0	0/9838=0	0/18408=0	4/18282=0	111/119076=0.001	0/30388=0	0/6174=0	-1	-1	-1	deleterious	0	probably_damaging	0.995	107	26.5
641	AR	KCND3	NM_004980.4	c.5C>A	p.(Ala2Glu)	3		LQTS	170	1	1	rs201340369	129/258510=0	4/22290=0	10/34054=0	0/9838=0	0/18408=0	4/18282=0	111/119076=0.001	0/30388=0	0/6174=0	-1	-1	-1	deleterious	0	probably_damaging	0.995	107	26.5
642	AR	KCND3	NM_004980.4	c.1622G>A	p.(Gly541Asp)	3		UA	238	4	3											-1	-1	-2	tolerated	0.09	possibly_damaging	0.506	94	24.5	34
643	AR	KCNE1	NM_000219.4	c.253G>A	p.(Asp85Asn)	R		UA	1	2	1	rs1805128	2578/277148=0.009	45/24020=0.002	94/34418=0.003	252/10150=0.025	106/18866=0.006	432/25792=0.017	1552/126652=0.012	43/30782=0.001	54/6468=0.008	2	1	1	deleterious	0.04	possibly damaging	0.575	23	21.8
644	AR	KCNE1	NM_000219.4	c.253G>A	p.(Asp85Asn)	R		(A)SCD	53	1	1	rs1805128	2578/277148=0.009	45/24020=0.002	94/34418=0.003	252/10150=0.025	106/18866=0.006	432/25792=0.017	1552/126652=0.012	43/30782=0.001	54/6468=0.008	2	1	1	deleterious	0.04	possibly damaging	0.575	23	21.8
645	AR	KCNE1	NM_000219.4	c.253G>A	p.(Asp85Asn)	R		UA	54	1	1	rs1805128	2578/277148=0.009	45/24020=0.002	94/34418=0.003	252/10150=0.025	106/18866=0.006	432/25792=0.017	1552/126652=0.012	43/30782=0.001	54/6468=0.008	2	1	1	deleterious	0.04	possibly damaging	0.575	23	21.8
646	AR	KCNE1	NM_005477.2	c.253G>A	p.(Asp85Asn)	R		UA	194	2	2	rs1805128	2578/277148=0.009	45/24020=0.002	94/34418=0.003	252/10150=0.025	106/18866=0.006	432/25792=0.017	1552/126652=0.012	43/30782=0.001	54/6468=0.008	2	1	1	deleterious	0.03	benign	0.22	23	16.95
647	AR	KCNE1	NM_005477.2	c.253G>A	p.(Asp85Asn)	R		CPVT	229	2	2	rs1805128	2578/277148=0.009	45/24020=0.002	94/34418=0.003	252/10150=0.025	106/18866=0.006	432/25792=0.017	1552/126652=0.012	43/30782=0.001	54/6468=0.008	2	1	1	tolerated	0.55	benign	0.012	56	18.65	26.0
648	AR	KCNE1	NM_005477.2	c.253G>A	p.(Asp85Asn)	R		UA	234	1	1	rs1805128	2578/277148=0.009	45/24020=0.002	94/34418=0.003	252/10150=0.025	106/18866=0.006	432/25792=0.017	1552/126652=0.012	43/30782=0.001	54/6468=0.008	2	1	1	deleterious	0.03	benign	0.22	23	16.95	32
649	AR	KCNE1	NM_005477.2	c.253G>A	p.(Asp85Asn)	R		UA	320	1	1	rs1805128	2578/277148=0.009	45/24020=0.002	94/34418=0.003	252/10150=0.025	106/18866=0.006	432/25792=0.017	1552/126652=0.012	43/30782=0.001	54/6468=0.008	2	1	1	deleterious	0.03	benign	0.22	23	16.95
650	AR	KCNE1	NM_000219.5	c.200G>A	p.(Arg67His)	3		UA	173	1	1	rs79654911	16/277122=0	7/24016=0	0/34418=0	1/10152=0	1/18870=0	0/25794=0	6/126626=0	0/30782=0	1/6464=0	0	0	0	deleterious	0	probably_damaging	0.984	29	31
651	AR	KCNE1	NM_000219.5	c.226G>A	p.(Asp76Asn)	5		LQTS	172	3	1	rs74315445	19/277116=0	1/24018=0	1/34420=0	0/10152=0	1/18868=0	0/25792=0	14/126618=0	2/30782=0	0/6466=0	2	1	1	deleterious	0.04	possibly_damaging	0.746	23	24.0
652	AR	KCNE1L	NM_012282.2	c.358C>T	p.(Gln120*)	4		UA	55	1	1	#N/A	#N/A	#N/A	#N/A	#N/A	#N/A	#N/A	#N/A	#N/A	#N/A	NA	NA	NA	NA	NA	NA	NA	NA	34
653	AR	KCNE1L		c.358C>T	p.(Gln120*)	4		UA	233	1	1	rs372565167	2/97762=0	0/5127=0	0/18266=0	0/5341=0	1/7431=0	0/10097=0	0/36273=0	0/12637=0	1/2590=0	-5	-4	-6	NA	NA	NA	NA	NA	35	18.50
654	AR	KCNE1L	NM_012282.2	c.109A>G	p.(Met37Val)	3		LQTS	369	2	2	rs774843309										1	1	1	tolerated	0.17	benign	0.01	21	12.63
655	AR	KCNE2	NM_172201.1	c.170T>C	p.(Ile57Thr)	3		UA	116	3	3	rs74315448	266/277246=0.001	4/24032=0	69/34420=0.002	14/10152=0.001	0/18868=0	0/25794=0	130/126730=0.001	30/30782=0.001	19/6468=0.003	-1	-1	-1	deleterious	0.04	probably_damaging	0.918	89	26.1
656	AR	KCNE2	NM_172201.1	c.170T>C	p.(Ile57Thr)	3		UA	117	2	2	rs74315448	266/277246=0.001	4/24032=0	69/34420=0.002	14/10152=0.001	0/18868=0	0/25794=0	130/126730=0.001	30/30782=0.001	19/6468=0.003	-1	-1	-1	deleterious	0.04	probably_damaging	0.918	89	26.1
657	AR	KCNE2	NM_172201.1	c.170T>C	p.(Ile57Thr)	3		UA	174	1	1	rs74315448	266/277246=0.001	4/24032=0	69/34420=0.002	14/10152=0.001	0/18868=0	0/25794=0	130/126730=0.001	30/30782=0.001	19/6468=0.003	-1	-1	-1	deleterious	0.04	probably_damaging	0.918	89	26.1
658	AR	KCNE2	NM_172201.1	c.358A>C	p.(Lys120Gln)	3		UA	175	1	1											1	1	1	tolerated	0.18	benign	0	53	13.00
659	AR	KCNE2	NM_172201.1	c.80G>A	p.(Arg27His)	3		BRS	176	1	1	rs148968498	24/277218=0	20/24024=0.001	3/34420=0	0/10152=0	0/18870=0	0/25788=0	1/126718=0	0/30782=0	0/6464=0	0	0	0	deleterious	0.04	probably_damaging	0.999	29	25.9
660	AR	KCNE3	NM_005472.4	c.222C>G	p.(Ser74Arg)	3		UA	56	1	1	rs760938276	4/277098=0	0/24026=0	0/34420=0	0/10150=0	0/18870=0	0/25788=0	4/126606=0	0/30778=0	0/6460=0	-1	-1	-1	deleterious	0.04	probably damaging	0.999	110	25.9
661	AR	KCNE3	NM_005472.4	c.49G>A	p.(Val17Met)	3		BRS	177	2	1	rs773287275	12/246066=0	0/15294=0	1/33580=0	0/9838=0	0/17246=0	0/22300=0	0/111546=0	11/30782=0	0/5480=0	1	1	1	tolerated	0.22	probably_damaging	0.996	21	22.7
662	AR	KCNH2	NM_000238.3	c.1600C>T	p.(Arg534Cys)	5		UA	239	1	1	rs199472916	0/227014=0	0/14240=0	0/32836=0	0/8030=0	0/17114=0	0/19874=0	0/102572=0	0/27326=0	0/5022=0	-3	-3	-4	deleterious	0	probably_damaging	1	180	25.3	26.6
663	AR	KCNH2	NM_000238.3	c.2354G>T	p.(Gly785Val)	5		LQTS	242	1	1	rs199472996										-3	-3	-4	deleterious	0	probably_damaging	1	109	28.9	35
664	AR	KCNH2	NM_000238.3	c.3040C>T	p.(Arg1014*)	5		LQTS	3	2	1	rs794728403	0/159186=0	0/8132=0	0/24608=0	0/8196=0	0/11794=0	0/15572=0	0/63204=0	0/23702=0	0/3978=0	NA	NA	NA	NA	NA	NA	NA	NA	44
665	AR	KCNH2	NM_000238.3	c.1708G>T	p.(Ala570Ser)	4		UA	236	1	1											1	1	1	deleterious	0	probably_damaging	0.99	99	25.8	24.5
666	AR	KCNH2	NM_000238.3	c.2692+1G>T	p.?	4		LQTS	243	1	1														NA	NA	NA	NA	NA	33	26.1
667	AR	KCNH2	NM_172056.2	c.2633G>A	p.(Arg878His)	3		UA	235	1	1	rs971751063	3/176176=0	1/16394=0	1/24546=0	0/8234=0	0/11846=0	0/18398=0	0/69676=0	1/22348=0	0/4734=0	0	0	0	NA	NA	NA	NA	NA	1607	25.3
668	AR	KCNH2	NM_000238.3	c.2729_2744dup	p.(Ser918Glyfs*7)	3		UA	238	4	1														NA	NA	NA	NA	NA		23.6
669	AR	KCNH2	NM_000238.3	c.2758C>G	p.(Arg920Gly)	3		UA	12	2	2	rs199473438	1/120540=0	0/5992=0	0/23256=0	0/7234=0	0/9824=0	0/6076=0	1/43528=0	0/21254=0	0/3376=0	-2	-2	-3	tolerated	0.23	benign	0.011	125	21.2
670	AR	KCNH2	NM_000238.3	c.3052C>G	p.(Pro1018Ala)	3		UA	241	1	1	rs41313764	4/150574=0	0/7342=0	1/24138=0	0/8064=0	0/11128=0	0/15212=0	3/57680=0	0/23198=0	0/3812=0	-1	-1	-1	tolerated	0.58	benign	0.015	27	17.39	28.4
671	AR	KCNH2	NM_000238.3	c.526C>T p	p.(Arg176Trp)	3		LQTS	237	1	1	rs36210422	44/107102=0	0/9608=0	0/14620=0	0/6880=0	0/4548=0	10/8044=0.001	31/44062=0.001	0/16214=0	3/3126=0.001	-2	-3	-4	deleterious	0	probably_damaging	0.973	101	23.5	21.1
672	AR	KCNH2	NM_000238.3	c.560_568del	p.(Gly187_189del)	3		BRS	244	1	1	rs551056698													NA	NA	NA	NA	NA	14.19	35
673	AR	KCNH2	NM_172057.2	c.82C>Ta	p.(Arg28Cys)	3		UA	240	2	1	rs62492438	13/192894=0	0/17080=0	1/27362=0	0/8628=0	1/13378=0	0/19358=0	10/78270=0	1/23798=0	0/5020=0	-3	-3	-4	NA	NA	NA	NA	NA	22.6	34
674	AR	KCNH2	NM_000238.3	c.321_322del	p.(Cys108Serfs*36)	5		LQTS	57	1	1	rs199472859										NA	NA	NA	NA	NA	NA	NA	NA	NA
675	AR	KCNH2	NM_000238.3	c.865G>T	p.(Glu289*)	5		LQTS	58	1	1	rs199472880										NA	NA	NA	NA	NA	NA	NA	NA	39
676	AR	KCNH2	NM_000238.3	c.2707G>A	p.(Gly903Arg)	3		UA	60	1	1	rs199473669	18/152292=0	2/14636=0	4/24032=0	0/7860=0	0/11388=0	0/9324=0	12/58764=0	0/21890=0	0/4398=0	-2	-2	-3	tolerated	0.33	benign	0	125	22.4
677	AR	KCNH2	NM_000238.3	c.278A>G	p.(Lys93Arg)	3		BRS	134	4	3	rs780197027	40/223948=0	0/12762=0	0/32688=0	0/9300=0	0/16508=0	0/20360=0	0/97694=0	40/29614=0.001	0/5022=0	3	2	2	tolerated	0.12	benign	0.065	26	22.8
678	AR	KCNH2	NM_005477.2	c.2904G>A	p.(Pro968Pro)	3	1 (RNA-analysis)	NCCM	226	2	2	rs75005975	14/259272=0	1/21854=0	2/33610=0	0/9784=0	2/18182=0	0/23348=0	8/116778=0	0/29602=0	1/6114=0				NA	NA	NA	NA	NA	0.148	23.0
679	AR	KCNH2	NM_000238.3	c.526C>T	p.(Arg176Trp)	3		LQTS	59	1	1	rs36210422	44/107102=0	0/9608=0	0/14620=0	0/6880=0	0/4548=0	10/8044=0.001	31/44062=0.001	0/16214=0	3/3126=0.001	-2	-3	-4	deleterious	0	probably damaging	1	101	27.0
680	AR	KCNH2	NM_000238.3	c.725G>A	p.(Arg242His)	3		UA	211	2	2											0	0	0	tolerated	0.22	benign	0	29	0.086	34
681	AR	KCNH2	NM_000238.3	c.1882_1884del	p.(Gly628del)	4		UA	183	1	1														NA	NA	NA	NA	NA	17.05
682	AR	KCNH2	NM_000238.3	c.215C>G	p.(Pro72Arg)	4		LQTS	186	1	1	rs199473421										-2	-2	-2	deleterious	0	probably_damaging	0.979	103	23.6
683	AR	KCNH2	NM_000238.3	c.301A>C	p.(Lys101Gln)	4		LQTS	184	2	1	rs199472856										1	1	1	deleterious	0	possibly_damaging	0.873	53	27.2
684	AR	KCNH2	NM_000238.3	c.2167T>G	p.(Cys723Gly)	3		UA	185	1	1	rs199472987	1/30832=0	0/8698=0	0/838=0	0/302=0	0/1620=0	0/3484=0	1/14912=0	0/0=0	0/978=0	-3	-3	-4	deleterious	0.01	benign	0.074	159	24.1
685	AR	KCNH2	NM_000238.3	c.527G>A	p.(Arg176Gln)	3		CPVT	182	1	1		4/76442=0	0/942=0	4/13830=0	0/6558=0	0/2954=0	0/4654=0	0/29144=0	0/16200=0	0/2160=0	1	1	1	tolerated	0.26	possibly_damaging	0.772	43	23.6
686	AR	KCNH2	NM_172057.2	c.82C>T	p.(Arg28Cys)	3		UA	181	1	1	rs62492438	13/192894=0	0/17080=0	1/27362=0	0/8628=0	1/13378=0	0/19358=0	10/78270=0	1/23798=0	0/5020=0	-3	-3	-4	NA	NA	NA	NA	NA	22.6
687	AR	KCNH2	NM_000238.3	c.1309G>T	p.(Glu437*)	5		LQTS	180	1	1											-5	-4	-6	NA	NA	NA	NA	NA	36
688	AR	KCNH2	NM_000238.3	c.2504G>A	p.(Arg835Gln)	4		LQTS	179	1	1	rs794728395	2/277194=0	2/24030=0	0/34420=0	0/10152=0	0/18868=0	0/25792=0	0/126682=0	0/30782=0	0/6468=0	1	1	1	deleterious	0.02	probably_damaging	0.987	43	25.2
689	AR	KCNH2	NM_000238.3	c.2679_2681dup	p.(Arg894dup)	3		LQTS	178	1	1	rs199473433													NA	NA	NA	NA	NA
690	AR	KCNJ2	NM_000891.2	c.1106C>T	p.(Ser369Leu)	3		UA	246	1	1											-3	-2	-3	tolerated	0.13	benign	0.142	145	23.5	32
691	AR	KCNJ2	NM_000891.2	c.208G>T	p.(Ala70Ser)	3		LQTS	248	1	1	rs375605948	13/277216=0	1/24026=0	0/34418=0	0/10150=0	0/18870=0	0/25790=0	12/126712=0	0/30782=0	0/6468=0	1	1	1	tolerated	0.84	benign	0.036	99	17.51	32
692	AR	KCNJ2	NM_000891.2	c.248G>T	p.(Trp83Leu)	3		UA	247	1	1											-2	-2	-2	deleterious	0.04	possibly_damaging	0.61	61	27.2	23.3
693	AR	KCNJ2	NM_000891.2	c.953A>G	p.(Asn318Ser)	3		UA	245	2	1	rs367560052	7/246156=0	0/15302=0	3/33580=0	0/9848=0	0/17246=0	0/22290=0	4/111632=0	0/30782=0	0/5476=0	1	1	0	tolerated	1	benign	0	46	15.22	34
694	AR	KCNJ2	NM_000891.2	c.224C>T	p.(Thr75Met)	5		UA	249	1	1	rs104894585										-1	-1	-1	deleterious	0	probably_damaging	1	81	26.6	15.59
695	AR	KCNJ5	NM_000890.3	c.783T>G	p.(Phe261Leu)	3		UA	16	2	1											1	0	0	tolerated	0.09	possibly damaging	0.927	22	22.4
696	AR	KCNJ5	NM_000890.3	c.793G>A	p.(Asp265Asn)	3		(A)SCD	250	1	1	rs758781514	3/275542=0	0/23924=0	0/34376=0	0/10086=0	1/18856=0	0/25764=0	2/125344=0	0/30756=0	0/6436=0	2	1	1	tolerated	0.32	probably_damaging	0.983	23	24.9	28.9
697	AR	KCNJ5	NM_000890.3	c.1151C>A	p.(Pro384Gln)	3		UA	156	2	2	rs148307402										-1	-1	-2	tolerated	0.26	benign	0.038	76	5851
698	AR	KCNJ5	NM_000890.3	c.274G>A	p.(Val92Ile)	3		VF	403	2	2	rs749202931	4/246270=0	0/15304=0	0/33582=0	0/9850=0	0/17248=0	0/22298=0	2/111720=0	0/30782=0	2/5486=0	3	3	3	tolerated	1	benign	0.079	29	17.27
699	AR	KCNJ5	NM_000890.3	c.4dup	p.(Ala2Glyfs*5)	3		UA	240	2	2		1/245886=0	0/15228=0	0/33572=0	0/9840=0	0/17242=0	0/22288=0	1/111462=0	0/30778=0	0/5476=0				NA	NA	NA	NA	NA	30	42
700	AR	KCNJ5	NM_000890.3	c.739G>A	p.(Gly247Arg)	3		UA	61	1	1	rs200170681	22/276452=0	1/24022=0	0/34372=0	9/10086=0.001	0/18868=0	0/25730=0	12/126294=0	0/30628=0	0/6452=0	-2	-2	-3	deleterious	0	probably damaging	1	125	27.9
701	AR	KCNJ8	NM_004982.3	c.1265C>T	p.(Ser422Leu)	3		UA	252	1	1	rs72554071	468/277092=0.002	1/24032=0	22/34416=0.001	305/10152=0.03	1/18870=0	2/25788=0	92/126588=0.001	30/30782=0.001	15/6464=0.002	-3	-2	-3	tolerated	0.09	benign	0.003	145	17.61
702	AR	KCNJ8	NM_004982.3	c.1265C>T	p.(Ser422Leu)	3		UA	253	1	1	rs72554071	468/277092=0.002	1/24032=0	22/34416=0.001	305/10152=0.03	1/18870=0	2/25788=0	92/126588=0.001	30/30782=0.001	15/6464=0.002	-3	-2	-3	tolerated	0.09	benign	0.003	145	17.61
703	AR	KCNJ8	NM_004982.3	c.129C>A	p.(Cys43*)	3		UA	251	1	1											-5	-4	-6	NA	NA	NA	NA	NA	35
704	AR	KCNJ8	NM_004982.3	c.821G>A	p.(Arg274His)	3		UA	255	1	1	rs149127157	9/277036=0	3/24026=0	0/34380=0	0/10144=0	0/18864=0	0/25770=0	6/126624=0	0/30772=0	0/6456=0	0	0	0	tolerated	0.27	benign	0.01	29	22.8
705	AR	KCNJ8	NM_004982.3	c.821G>A	p.(Arg274His)	3		UA	254	1	1	rs149127157	9/277036=0	3/24026=0	0/34380=0	0/10144=0	0/18864=0	0/25770=0	6/126624=0	0/30772=0	0/6456=0	0	0	0	tolerated	0.27	benign	0.01	29	22.8
706	AR	KCNJ8	NM_004982.2	c.462G>T	p.(Leu154Phe)	3		BRS	62	1	1		3/242848=0	0/15250=0	0/33542=0	0/9818=0	0/17238=0	0/20194=0	3/110580=0	0/30774=0	0/5452=0	1	0	0	tolerated	0.08	probably damaging	0.957	22	18.32
707	AR	KCNJ8	NM_004982.3	c.462G>T	p.(Leu154Phe)	3		CPVT	256	1	1		3/242848=0	0/15250=0	0/33542=0	0/9818=0	0/17238=0	0/20194=0	3/110580=0	0/30774=0	0/5452=0	1	0	0	tolerated	0.06	possibly_damaging	0.717	22	23.5
708	AR	KCNQ1	NM_000218.2	c.1153G>T	p.(Glu385*)	5		UA	260	1	1	rs199473473										-5	-4	-6	NA	NA	NA	NA	NA	41
709	AR	KCNQ1	NM_000218.2	c.887T>C	p.(Phe296Ser)	5		LQTS	4	2	1	rs199472738										-2	-2	-3	deleterious	0	probably damaging	1	155	26.1
710	AR	KCNQ1	NM_000218.2	c.887T>C	p.(Phe296Ser)	5		UA	261	2	1	rs199472738										-2	-2	-3	deleterious	0	probably_damaging	0.998	155	25.7
711	AR	KCNQ1	NM_000218.2	c.1810dup	p.(Gln604Profs*48)	4		LQTS	257	2	1														NA	NA	NA	NA	NA	35
712	AR	KCNQ1	NM_000218.2	c.1092C>G	p.(Phe364Leu)	3		BRS	259	1	1											1	0	0	tolerated	0.06	possibly_damaging	0.476	22	24.1
713	AR	KCNQ1	NM_000218.2	c.160_168dup	p.(Ile54_Pro56)dup	3		UA	262	1	1														NA	NA	NA	NA	NA	17.42
714	AR	KCNQ1	NM_000218.2	c.160_168dup	p.(Ile54_Pro56)dup	3		LQTS	263	3	1														NA	NA	NA	NA	NA	17.42
715	AR	KCNQ1	NM_000218.2	c.1022C>T	p.(Ala341Val)	5		LQTS	266	2	1	rs12720459										0	0	0	deleterious	0	probably_damaging	0.999	64	26.4
716	AR	KCNQ1	NM_000218.2	c.1117T>C	p.(Ser373Pro)	5		UA	264	1	1	rs199472766										-1	-1	-1	deleterious	0.03	possibly_damaging	0.863	74	24.4
717	AR	KCNQ1	NM_000218.2	c.1265del	p.(Lys422Serfs*10)	5		UA	63	1	1	rs199472778										NA	NA	NA	NA	NA	NA	NA	NA	NA
718	AR	KCNQ1	NM_000218.2	c.332A>G	p.(Tyr111Cys)	5		LQTS	258	1	1	rs199472678	2/220562=0	0/13502=0	0/33148=0	0/9420=0	0/16802=0	0/12508=0	2/99738=0	0/30340=0	0/5104=0	-3	-2	-3	deleterious	0	probably_damaging	0.997	194	28.5
719	AR	KCNQ1	NM_000218.2	c.113T>C	p.(Leu38Pro)	3		UA	238	4	2											-3	-3	-3	tolerated	0.06	possibly_damaging	0.502	98	23.4	10.06
720	AR	KCNQ1	NM_000218.2	c.136G>A	p.(Ala46Thr)	3		(A)SCD	64	1	1	rs199473671	1/16430=0	0/282=0	0/2590=0	0/1486=0	0/68=0	0/1306=0	1/6110=0	0/4076=0	0/512=0	0	0	0	tolerated	0.39	benign	0	58	18.55
721	AR	KCNQ1	NM_000218.2	c.1449C>A	p.(Asn483Lys)	3		UA	66	1	1											0	0	0	tolerated	0.48	benign	0.027	94	22.8
722	AR	KCNQ1	NM_000218.2	c.160_168dup	p.(Ile54_Pro56)dup	3		UA	265	1	1														NA	NA	NA	NA	NA	17.42
723	AR	KCNQ1	NM_000218.2	c.217C>A	p.(Pro73Thr)	3		BRS	195	2	2	rs199472676	26/179838=0	1/14370=0	1/23488=0	0/7832=0	0/11202=0	0/11594=0	22/84524=0	0/22428=0	2/4400=0	-1	-1	-2	tolerated	0.4	benign	0	38	8149
724	AR	KCNQ1	NM_000218.2	c.265C>T	p.(Pro89Ser)	3		(A)SCD	65	1	1	rs759092695	0/219140=0	0/13210=0	0/33142=0	0/9394=0	0/16792=0	0/12626=0	0/98600=0	0/30330=0	0/5046=0	-1	-1	-1	tolerated	0.16	benign	0.205	74	16.30
725	AR	KCNQ1	NM_000218.2	c.590C>T	p.(Pro197Leu)	3		LQTS	172	3	2	rs200108320	12/244266=0	0/15222=0	0/33566=0	0/9840=0	0/17210=0	0/20840=0	12/111358=0	0/30772=0	0/5458=0	-3	-3	-3	deleterious	0	probably_damaging	0.984	98	31
726	AR	KCNQ1	NM_000218.2	c.875G>A	p.(Gly292Asp)	3		UA	153	2	2	rs199472736	12/276588=0	0/23938=0	0/34414=0	0/10128=0	0/18858=0	0/25738=0	12/126288=0	0/30772=0	0/6452=0	-1	-1	-2	deleterious	0.03	possibly_damaging	0.823	94	22.9
727	AR	KCNQ1	NM_000218.2	c.875G>A	p.(Gly292Asp)	3		BRS	352	2	2	rs199472736	12/276588=0	0/23938=0	0/34414=0	0/10128=0	0/18858=0	0/25738=0	12/126288=0	0/30772=0	0/6452=0	-1	-1	-2	deleterious	0.03	possibly_damaging	0.823	94	22.9
728	CM	LAMA4	NM_001105206.2	c.1077+5G>A	p.?	3		DCM	1238	3	3	rs782576647	6/246084=0	1/15298=0	1/33580=0	0/9844=0	0/17240=0	0/22276=0	4/111586=0	0/30780=0	0/5480=0				NA	NA	NA	NA	NA	15.38
729	CM	LAMA4	NM_001105206.2	c.1778A>G	p.(His593Arg)	3		HCM	974	3	2	rs751004946	6/246122=0	0/15298=0	0/33570=0	0/9844=0	0/17230=0	0/22292=0	6/111626=0	0/30780=0	0/5482=0	0	0	0	deleterious	0.01	benign	0.052	29	22.9
730	CM	LAMA4	NM_001105206.2	c.188C>T	p.(Ala63Val)	3		UCM	1198	3	2	rs370868386	8/197830=0	0/11410=0	1/27960=0	0/8988=0	0/13554=0	0/18878=0	4/84886=0	1/27502=0	2/4652=0	0	0	0	tolerated	0.17	benign	0.037	64	15.83
731	CM	LAMA4	NM_001105206.2	c.191C>T	p.(Ala64Val)	3		UCM	1198	3	3	rs376091454	8/204562=0	0/11936=0	1/28690=0	0/9102=0	0/14032=0	0/19414=0	4/88562=0	1/28070=0	2/4756=0	0	0	0	tolerated	0.69	benign	0	64	9110
732	CM	LAMA4	NM_001105206.2	c.1959T>G	p.(Asp653Glu)	3		DCM	908	1	1	rs143269044										2	2	1	tolerated	0.22	benign	0.055	0	14.72
733	CM	LAMA4	NM_001105206.2	c.1999G>T	p.(Asp667Tyr)	3		UCM	640	1	1	rs397516720	240/276942=0.001	3/24032=0	0/34412=0	0/10144=0	0/18856=0	0/25764=0	18/126494=0	214/30782=0.007	5/6458=0.001	-2	-3	-4	tolerated	0.05		possibly damaging	0.556	160
734	CM	LAMA4	NM_001105206.2	c.200G>A	p.(Cys67Tyr)	3		UCM	909	1	1											-3	-2	-3	deleterious	0	probably_damaging	0.997	194	24.3
735	CM	LAMA4	NM_001105206.2	c.2305T>C	p.(Phe769Leu)	3		HCM	910	2	1											1	0	0	tolerated	0.42	benign	0.176	22	17.26
736	CM	LAMA4	NM_001105206.2	c.2371G>T	p.(Val791Phe)	3		DCM	911	1	1	rs545036600										0	-1	-1	deleterious	0.01	probably_damaging	0.967	50	23.2
737	CM	LAMA4	NM_001105206.2	c.2398C>T	p.(Arg800Cys)	3		UCM	1260	3	2	rs202184174	33/276854=0	31/24036=0.001	1/34412=0	0/10138=0	0/18828=0	0/25752=0	1/126448=0	0/30780=0	0/6460=0	-3	-3	-4	deleterious	0	probably_damaging	0.995	180	28.7
738	CM	LAMA4		c.2576C>T	p.(Thr859Met)	3		LQTS	267	4	1	rs730880121	5/246144=0	0/15304=0	2/33582=0	0/9846=0	0/17240=0	0/22300=0	3/111604=0	0/30782=0	0/5486=0	-1	-1	-1	deleterious	0	probably_damaging	0.993	81	25.5
739	CM	LAMA4	NM_001105206.2	c.2576C>T	p.(Thr859Met)	3		DCM	485	2	2	rs730880121	5/246144=0	0/15304=0	2/33582=0	0/9846=0	0/17240=0	0/22300=0	3/111604=0	0/30782=0	0/5486=0	-1	-1	-1	deleterious	0		probably damaging	0.993	81
740	CM	LAMA4	NM_001105206.2	c.2576C>T	p.(Thr859Met)	3		HCM	912	3	1	rs730880121	5/246144=0	0/15304=0	2/33582=0	0/9846=0	0/17240=0	0/22300=0	3/111604=0	0/30782=0	0/5486=0	-1	-1	-1	deleterious	0	probably_damaging	0.993	81	25.5
741	CM	LAMA4	NM_002294.2	c.2576C>T	p.(Thr859Met)	3		ARVC	913	2	1	rs730880121	5/246144=0	0/15304=0	2/33582=0	0/9846=0	0/17240=0	0/22300=0	3/111604=0	0/30782=0	0/5486=0	-1	-1	-1	deleterious	0	probably_damaging	0.993	81	25.5
742	CM	LAMA4	NM_001105206.2	c.2888_2889del	p.(Lys963Argfs*7)	3		HCM	914	3	1														NA	NA	NA	NA	NA	35
743	CM	LAMA4	NM_001105206.2	c.3230T>C	p.(Ile1077Thr)	3		HCM	915	1	1											-1	-1	-1	deleterious	0.01	benign	0.356	89	24.9
744	CM	LAMA4	NM_001105206.2	c.3250G>A	p.(Asp1084Asn)	3		NCCM	916	1	1											2	1	1	tolerated	0.53	benign	0.084	23	22.9
745	CM	LAMA4	NM_001105206.2	c.3325G>A	p.(Val1109Met)	3		NCCM	1516	6	3		1/245618=0	0/15302=0	0/33550=0	0/9832=0	0/17192=0	0/22184=0	0/111314=0	1/30776=0	0/5468=0	1	1	1	deleterious	0.01	possibly_damaging	0.837	21	24.2
746	CM	LAMA4	NM_001105206.2	c.3506C>T	p.(Pro1169Leu)	3		DCM	917	6	1	rs730880123	4/245584=0	0/15296=0	0/33538=0	0/9842=0	0/17218=0	0/22210=0	4/111242=0	0/30778=0	0/5460=0	-3	-3	-3	deleterious	0	probably_damaging	0.999	98	32
747	CM	LAMA4	NM_001105206.2	c.3557+7C>	p.?	3		HCM	825	3	3														NA	NA	NA	NA	NA	8970
748	CM	LAMA4	NM_001105206.2	c.3698T>A	p.(Ile1233Lys)	3		DCM	918	2	1											-3	-3	-3	deleterious	0	benign	0.092	102	26.6
749	CM	LAMA4	NM_001105206.2	c.3847T>G	p.(Ser1283Ala)	3		HCM	1021	3	3											1	1	1	tolerated	0.09	benign	0.372	99	23.2
750	CM	LAMA4	NM_001105206.2	c.3980T>C	p.(Ile1327Thr)	3		UCM	486	2	2	rs376471900										-1	-1	-1	tolerated	0.2		benign	0.009	89
751	CM	LAMA4	NM_001105206.2	c.4208C>T	p.(Pro1403Leu)	3		HCM	919	3	1		1/30952=0	1/8736=0	0/838=0	0/302=0	0/1612=0	0/3488=0	0/14994=0	0/0=0	0/982=0	-3	-3	-3	deleterious	0	probably_damaging	0.997	98	31
752	CM	LAMA4	NM_001105206.2	c.4436G>A	p.(Arg1479His)	3		DCM	827	3	2	rs140346737	26/277016=0	22/24030=0.001	1/34408=0	0/10144=0	0/18858=0	0/25792=0	3/126542=0	0/30782=0	0/6460=0	0	0	0	tolerated	0.07	benign	0.028	29	23.4
753	CM	LAMA4	NM_001105206.2	c.4493G>A	p.(Arg1498His)	3		DCM	1470	4	4	rs147556641	28/276476=0	3/24026=0	2/34328=0	0/10136=0	0/18812=0	1/25746=0	14/126212=0	8/30766=0	0/6450=0	0	0	0	tolerated	0.06	benign	0.354	29	23.8
754	CM	LAMA4	NM_001105206.2	c.4645A>T	p.(Asn1549Tyr)	3		HCM	415	3	2	rs141261442	55/276614=0	4/24028=0	2/34374=0	0/10142=0	0/18856=0	0/25626=0	47/126420=0	0/30720=0	2/6448=0	-2	-2	-3	deleterious	0.01		possibly damaging	0.745	143
755	CM	LAMA4	NM_001105206.2	c.4645A>T	p.(Asn1549Tyr)	3		ARVC	799	2	2	rs141261442	55/276614=0	4/24028=0	2/34374=0	0/10142=0	0/18856=0	0/25626=0	47/126420=0	0/30720=0	2/6448=0	-2	-2	-3	deleterious	0	possibly_damaging	0.745	143	27.2
756	CM	LAMA4	NM_001105206.2	c.4645A>T	p.(Asn1549Tyr)	3		UCM	888	3	2	rs141261442	55/276614=0	4/24028=0	2/34374=0	0/10142=0	0/18856=0	0/25626=0	47/126420=0	0/30720=0	2/6448=0	-2	-2	-3	deleterious	0	possibly_damaging	0.745	143	27.2
757	CM	LAMA4	NM_001105206.2	c.4645A>T	p.(Asn1549Tyr)	3		DCM	920	3	1	rs141261442	55/276614=0	4/24028=0	2/34374=0	0/10142=0	0/18856=0	0/25626=0	47/126420=0	0/30720=0	2/6448=0	-2	-2	-3	deleterious	0	possibly_damaging	0.745	143	27.2
758	CM	LAMA4	NM_001105206.2	c.4645A>T	p.(Asn1549Tyr)	3		HCM	1041	2	2	rs141261442	55/276614=0	4/24028=0	2/34374=0	0/10142=0	0/18856=0	0/25626=0	47/126420=0	0/30720=0	2/6448=0	-2	-2	-3	deleterious	0	possibly_damaging	0.745	143	27.2
759	CM	LAMA4	NM_001105206.2	c.4645A>T	p.(Asn1549Tyr)	3		DCM	1521	2	2	rs141261442	55/276614=0	4/24028=0	2/34374=0	0/10142=0	0/18856=0	0/25626=0	47/126420=0	0/30720=0	2/6448=0	-2	-2	-3	deleterious	0	possibly_damaging	0.745	143	27.2
760	CM	LAMA4	NM_001105206.2	c.4792G>T	p.(Ala1598Ser)	3		DCM	1601	1	1	rs202176359	55/276850=0	1/24024=0	7/34388=0	0/10140=0	0/18858=0	0/25782=0	46/126418=0	0/30782=0	1/6458=0	1	1	1	tolerated	0.11	probably_damaging	0.978	99	25.0
761	CM	LAMA4	NM_001105206.2	c.4934T>C	p.(Met1645Thr)	3		UCM	493	2	1											-1	-1	-1	tolerated	1		benign	0.095	81
762	CM	LAMA4	NM_001105206.2	c.4967G>T	p.(Gly1656Val)	3		DCM	1519	2	2	rs41289900	19/276824=0	0/24022=0	10/34394=0	0/10140=0	0/18864=0	0/25790=0	8/126378=0	0/30780=0	1/6456=0	-3	-3	-4	deleterious	0	probably_damaging	0.999	109	33
763	CM	LAMA4	NM_001105206.2	c.503G>A	p.(Arg168Lys)	3		HCM	748	4	2	rs200368819	20/276782=0	18/24032=0.001	1/34410=0	0/10128=0	0/18866=0	0/25782=0	1/126324=0	0/30782=0	0/6458=0	3	2	2	deleterious	0.01	possibly_damaging	0.655	26	34
764	CM	LAMA4	NM_004572.3	c.503G>A	p.(Arg168Lys)	3		HCM	1166	2	2	rs200368819	20/276782=0	18/24032=0.001	1/34410=0	0/10128=0	0/18866=0	0/25782=0	1/126324=0	0/30782=0	0/6458=0	3	2	2	deleterious	0.01	possibly_damaging	0.655	26	34
765	CM	LAMA4	NM_001105206.2	c.578C>T	p.(Ser193Leu)	3		HCM	745	4	3	rs147870828	16/276520=0	16/24026=0.001	0/34400=0	0/10126=0	0/18810=0	0/25792=0	0/126146=0	0/30768=0	0/6452=0	-3	-2	-3	deleterious	0	probably_damaging	0.968	145	31
766	CM	LAMA4	NM_001105206.2	c.59C>T	p.(Ala20Val)	3		HCM	1522	7	6											0	0	0	tolerated	0.34	benign	0	64	19.27
767	CM	LAMA4	NM_001105206.2	c.640C>T	p.(Arg214Cys)	3		NCCM	1516	6	4	rs148801194	6/245698=0	0/15294=0	0/33560=0	0/9826=0	0/17190=0	0/22290=0	3/111284=0	3/30782=0	0/5472=0	-3	-3	-4	deleterious	0.02	probably_damaging	0.964	180	28.6
768	CM	LAMA4	NM_001105206.1	c.674C>T	p.(Ala225Val)	3		HCM	492	2	1	rs149615862	153/276556=0.001	3/24024=0	107/34392=0.003	13/10122=0.001	0/18810=0	0/25784=0	21/126198=0	0/30780=0	9/6446=0.001	0	0	0	tolerated	0.13		probably damaging	0.999	64
769	CM	LAMA4	NM_001105206.2	c.701T>G	p.(Ile234Arg)	3		UCM	841	3	3											-3	-3	-3	tolerated	0.25	benign	0.001	97	14.68
770	CM	LAMA4	NM_001105206.2	c.967-15C>G	p.?	3		UCM	1260	3	3	rs375041786	30/276902=0	29/24032=0.001	1/34408=0	0/10144=0	0/18850=0	0/25732=0	0/126502=0	0/30776=0	0/6458=0				NA	NA	NA	NA	NA	2770
771	both	LAMP2	NM_002294.2, N	c.1091C>T	p.(Thr364Ile)	3		VF	269	1	1	rs183781327	9/200110=0	0/18141=0	6/27128=0	0/7465=0	0/13906=0	0/19066=0	3/90577=0	0/19057=0	0/4770=0	-1	-1	-1	deleterious	0.05	probably_damaging	0.951	89	33
772	both	LAMP2	NM_002294.2	c.778C>T	p.(His260Tyr)	3		UA	17	3	1	rs778577575	5/200087=0	0/18046=0	0/27186=0	0/7474=0	0/13901=0	0/19053=0	5/90525=0	0/19141=0	0/4761=0	2	2	2	deleterious	0.02	benign	0.439	83	9.150
773	both	LAMP2	NM_002294.2	c.778C>T	p.(His260Tyr)	3		UA	268	3	1	rs778577575	5/200087=0	0/18046=0	0/27186=0	0/7474=0	0/13901=0	0/19053=0	5/90525=0	0/19141=0	0/4761=0	2	2	2	tolerated	0.07	possibly_damaging	0.53	83	11.95
774	both	LAMP2	NM_002294.2	c.65-13T>A	p.?	3		ARVC	913	2	2	rs727503121	3/131725=0	0/9112=0	0/22090=0	0/6182=0	0/8955=0	0/13494=0	3/55081=0	0/13598=0	0/3213=0				NA	NA	NA	NA	NA	0.939
775	both	LAMP2	NM_002294.2	c.661G>A	p.(Gly221Arg)	3		DCM	455	2	2	rs145169006	294/200310=0.001	8/18111=0	43/27190=0.002	21/7479=0.003	0/13904=0	23/19071=0.001	181/90636=0.002	0/19145=0	18/4774=0.004	-2	-2	-3	deleterious	0		probably damaging	1	125
776	CM	LDB3	NM_007078.2	c.1789T>A	p.(Tyr597Asn)	4		UCM	578	1	1	rs727503131	3/246270=0	0/15304=0	0/33582=0	0/9850=0	0/17248=0	1/22300=0	2/111720=0	0/30782=0	0/5484=0	-3	-2	-3	tolerated	0.44		benign	0.001	145
777	CM	LDB3	NM_001171610.1	c.1873-2A>G	p.?	4		DCM	452	2	1											-3	-2	-3	tolerated	0.44		benign	0.001	145
778	CM	LDB3	NM_007078.2	c.566C>T	p.(Ser189Leu)	4		DCM	576	1	1	rs45487699	174/276582=0.001	1/23962=0	26/34414=0.001	1/10128=0	0/18854=0	21/25776=0.001	89/126228=0.001	29/30770=0.001	7/6450=0.001	-1	-1	-1	tolerated	0.13		benign	0.311	74
779	CM	LDB3	NM_007078.2	c.566C>T	p.(Ser189Leu)	4		HCM	577	1	1	rs45487699	174/276582=0.001	1/23962=0	26/34414=0.001	1/10128=0	0/18854=0	21/25776=0.001	89/126228=0.001	29/30770=0.001	7/6450=0.001	-3	-3	-3	deleterious	0.02		possibly damaging	0.726	98
780	CM	LDB3	NM_007078.2	c.1045T>A	p.(Ser349Thr)	3		DCM	813	4	2	rs147042608	48/274342=0	46/23724=0.002	2/34384=0	0/10064=0	0/18852=0	0/25462=0	0/124702=0	0/30752=0	0/6402=0	2	1	1	NA	NA	NA	NA	NA	0.039
781	CM	LDB3	NM_007078.2	c.1120G>A	p.(Ala374Thr)	3		DCM	827	3	3	rs762701610	2/243866=0	0/15076=0	0/33550=0	0/9804=0	0/17210=0	0/21246=0	1/110768=0	1/30762=0	0/5450=0	0	0	0	tolerated	0.68	benign	0	58	0.191
782	CM	LDB3	NM_001171611.1	c.1163G>A	p.(Gly388Asp)	3		ARVC	1452	2	2											-1	-1	-2	NA	NA	NA	NA	NA	20.3
783	CM	LDB3	NM_007078.2	c.1235C>G	p.(Pro412Arg)	3		DCM	494	2	1		1/243140=0	0/15206=0	0/33562=0	0/9822=0	0/17216=0	0/22300=0	1/108812=0	0/30776=0	0/5446=0	-1	-1	-2	tolerated	0.31		benign	0.01	76
784	CM	LDB3	NM_007078.2	c.1487T>C	p.(Phe496Ser)	3		DCM	645	1	1	rs147072071	18/275484=0	1/23968=0	1/34416=0	0/10146=0	0/18856=0	0/25792=0	15/125066=0	0/30782=0	1/6458=0	-1	-1	-2	tolerated	0.31		benign	0.01	76
785	CM	LDB3	NM_007078.2	c.1535A>C	p.(Gln512Pro)	3		DCM	495	2	1	rs138951890	173/276442=0.001	2/23994=0	4/34416=0	0/10150=0	0/18864=0	74/25788=0.003	85/125988=0.001	7/30782=0	1/6460=0	-2	-2	-3	deleterious	0		probably damaging	0.999	143
786	CM	LDB3	NM_007078.2	c.1535A>C	p.(Gln512Pro)	3		UCM	646	1	1	rs138951890	173/276442=0.001	2/23994=0	4/34416=0	0/10150=0	0/18864=0	74/25788=0.003	85/125988=0.001	7/30782=0	1/6460=0	3	3	3	deleterious	0		possibly damaging	0.842	29
787	CM	LDB3	NM_007078.2	c.1672A>G	p.(Ile558Val)	3		NCCM	496	2	1	rs372331627	65/261386=0	0/22684=0	1/32918=0	0/9826=0	0/17906=0	0/24370=0	9/117960=0	54/29526=0.002	1/6196=0	3	3	4	deleterious	0		benign	0.042	29
788	CM	LDB3	NM_007078.2	c.1870G>A	p.(Ala624Thr)	3		HCM	921	1	1	rs879218802	1/246254=0	0/15302=0	0/33580=0	0/9850=0	0/17248=0	0/22300=0	1/111706=0	0/30782=0	0/5486=0	0	0	0	deleterious	0	probably_damaging	0.999	58	33
789	CM	LDB3	NM_007078.2	c.2037C>T	p.(Gly679Gly)	3		DCM	647	1	1	rs754386652	8/277188=0	0/24028=0	0/34416=0	0/10150=0	0/18870=0	0/25780=0	4/126696=0	4/30782=0	0/6466=0	NA	NA	NA	NA	NA		NA	NA	NA
790	CM	LDB3	NM_007078.2	c.2060G>A	p.(Gly687Asp)	3		DCM	487	2	2		1/30972=0	0/8730=0	0/838=0	0/302=0	0/1622=0	0/3494=0	1/15008=0	0/0=0	0/978=0	-1	-1	-2	deleterious	0		probably damaging	1	94
791	CM	LDB3	NM_007078.2	c.2092G>A	p.(Ala698Thr)	3		DCM	480	2	2	rs45577134	68/277130=0	7/24028=0	4/34414=0	0/10146=0	0/18870=0	3/25794=0	54/126644=0	0/30766=0	0/6468=0	0	0	0	deleterious	0		possibly damaging	0.901	58
792	CM	LDB3	NM_007078.2	c.295C>T	p.(Pro99Ser)	3		UCM	641	1	1	rs201693259	289/277180=0.001	0/24028=0	0/34420=0	0/10152=0	0/18868=0	242/25780=0.009	38/126688=0	0/30780=0	9/6464=0.001	3	2	2	tolerated	0.35		probably damaging	0.985	26
793	CM	LDB3	NM_001171610.1	c.299T>C	p.(Leu100Pro)	3		DCM	642	1	1											3	2	2	tolerated	0.35		probably damaging	0.985	26
794	CM	LDB3	NM_001171610.1	c.399_407del	p.(Gly134_Pro136del)	3		UCM	922	3	1	rs756150070													NA	NA	NA	NA	NA	14.99
795	CM	LDB3	NM_001171610.1	c.59del	p.(Gly20Alafs*41)	3		DCM	923	1	1	rs149348427													NA	NA	NA	NA	NA	26.4
796	CM	LDB3	NM_001171610.1	c.59del	p.(Gly20Alafs*41)	3		DCM	924	3	1	rs149348427													NA	NA	NA	NA	NA	26.4
797	CM	LDB3	NM_001171610.1	c.691G>A	p.(Ala231Thr)	3		UCM	925	2	1	rs200458194	25/276936=0	2/24006=0	0/34420=0	0/10148=0	1/18868=0	0/25780=0	3/126488=0	18/30780=0.001	1/6446=0	0	0	0	tolerated	0.65	benign	0.241	58	18.92
798	CM	LDB3	NM_007078.2	c.715G>A	p.(Pro307Arg)	3		HCM	1110	2	2	rs201417512	41/277134=0	3/24016=0	1/34414=0	0/10152=0	5/18870=0	9/25792=0	21/126640=0	0/30782=0	2/6468=0	3	3	3	tolerated	0.23	benign	0.161	29	18.19
799	CM	LDB3	NM_007078.2	c.752A>G	p.(Lys251Arg)	3		NCCM	643	1	1	rs34423165	1922/277190=0.007	1206/24016=0.05	100/34420=0.003	29/10152=0.003	25/18870=0.001	7/25794=0	173/126688=0.001	357/30782=0.012	25/6468=0.004	-2	-2	-2	tolerated	0.1		possibly damaging	0.704	103
800	CM	LDB3	NM_007078.2	c.752A>G	p.(Lys251Arg)	3		NCCM	644	1	1	rs34423165	1922/277190=0.007	1206/24016=0.05	100/34420=0.003	29/10152=0.003	25/18870=0.001	7/25794=0	173/126688=0.001	357/30782=0.012	25/6468=0.004	-2	-2	-3	deleterious	0		benign	0.347	155
801	CM	LDB3	NM_007078.2	c.944C>T	p.(Pro315Leu)	3		DCM	926	2	1	rs371649487	3/30938=0	1/8716=0	0/836=0	0/302=0	1/1622=0.001	0/3494=0	1/14986=0	0/0=0	0/982=0	-3	-3	-3	NA	NA	NA	NA	NA	18.93
802	CM	LDB3	NM_007078.2	c.991G>A	p.(Ala331Thr)	3		NCCM	936	2	2	rs749520121	7/276106=0	0/23886=0	0/34398=0	2/10126=0	0/18824=0	0/25774=0	5/125880=0	0/30770=0	0/6448=0	0	0	0	NA	NA	NA	NA	NA	0.698
803	both	LMNA	NM_170707.3	c.1177_1186del	p.(Pro393Serfs*84)	5		UA	274	1	1														NA	NA	NA	NA	NA	35
804	both	LMNA	NM_170707.3	c.1A>G	p.(Met1?)	4		UA	271	1	1														deleterious	0	benign	0.117	21	24.0
805	both	LMNA	NM_170707.3	c.725C>T	p.(Ala242Val)	4		UA	275	1	1	rs397517906	2/246234=0	0/15302=0	0/33582=0	0/9848=0	0/17248=0	0/22276=0	0/111710=0	2/30782=0	0/5486=0	0	0	0	deleterious	0.01	possibly_damaging	0.657	64	26.0
806	both	LMNA	NM_170707.3	c.725C>T	p.(Ala242Val)	4		UA	276	1	1	rs397517906	2/246234=0	0/15302=0	0/33582=0	0/9848=0	0/17248=0	0/22276=0	0/111710=0	2/30782=0	0/5486=0	0	0	0	deleterious	0.01	possibly_damaging	0.657	64	26.0
807	both	LMNA	NM_170707.3	c.992G>A	p.(Arg331Gln)	4	5 (cosegregation)	UA	272	1	1	rs59301204	3/245554=0	0/15170=0	0/33572=0	0/9822=0	0/17230=0	0/22260=0	2/111248=0	1/30778=0	0/5474=0	1	1	1	deleterious	0.04	benign	0.274	43	26.5
808	both	LMNA	NM_170707.3	c.1487C>T	p.(Thr496Met)	3		UA	273	1	1	rs200466188	3/246132=0	0/15300=0	3/33582=0	0/9842=0	0/17246=0	0/22270=0	0/111624=0	0/30782=0	0/5486=0	-1	-1	-1	deleterious	0	probably_damaging	1	81	35
809	both	LMNA	NM_170707.3	c.161C>T	p.(Thr54Met)	3		UA	277	1	1	rs879253992	1/209396=0	0/11914=0	0/29778=0	0/9132=0	1/15000=0	0/18886=0	0/92548=0	0/27342=0	0/4796=0	-1	-1	-1	tolerated	0.25	benign	0.227	81	23.0
810	both	LMNA	NM_170707.3	c.1634G>A	p.(Arg545His)	3		UA	15	2	2	rs142191737	43/186044=0	1/17220=0	2/24938=0	0/8606=0	0/12772=0	0/18654=0	38/75898=0.001	1/23038=0	1/4918=0	0	0	0	tolerated	0.14	probably damaging	0.999	29	24.0
811	both	LMNA	NM_170707.3	c.1745G>A	p.(Arg582His)	3		UA	17	3	2	rs57830985	3/269168=0	1/23182=0	0/34292=0	0/9972=0	0/18708=0	0/25224=0	2/120826=0	0/30620=0	0/6344=0	0	0	0	deleterious	0	probably damaging	0.998	29	34
812	both	LMNA	NM_170707.2	c.664C>T	p.(His222Tyr)	3		CPVT	279	1	1	rs28928901										2	2	2	tolerated	0.12	benign	0.06	83	22.4
813	both	LMNA	NM_170707.3	c.952G>A	p.(Ala318Thr)	3		UA	278	2	1	rs267607574	5/275256=0	0/23636=0	0/34396=0	0/10088=0	0/18822=0	0/25620=0	5/125494=0	0/30768=0	0/6432=0	0	0	0	tolerated	0.66	benign	0.3	58	22.4
814	both	LMNA	NM_170707.3	c.1003C>T	p.(Arg335Trp)	5		DCM	1515	3	1	rs386134243										-2	-3	-4	deleterious	0.01	probably_damaging	0.964	101	34
815	both	LMNA	NM_170707.2	c.1130G>T	p.(Arg377Leu)	5		DCM	515	1	1	rs61672878										-2	-2	-3	deleterious	0.02		probably damaging	0.999	102
816	both	LMNA	NM_170707.2	c.1238del	p.(Gly413Alafs*67)	5		UCM	930	2	1														NA	NA	NA	NA	NA	21.9
817	both	LMNA	NM_170707.3	c.1621C>T	p.(Arg541Cys)	5		DCM	934	3	1	rs56984562										-3	-3	-4	deleterious	0	probably_damaging	1	180	33
818	both	LMNA	NM_170707.3	c.568C>T	p.(Arg190Trp)	5		DCM	513	1	1	rs59026483										-2	-3	-4	deleterious	0		probably damaging	0.958	101
819	both	LMNA	NM_170707.2	c.777T>A	p.(Tyr259*)	5		DCM	514	1	1	rs58048078										NA	NA	NA	NA	NA		NA	NA	NA
820	both	LMNA	NM_170707.3	c.992G>A	p.(Arg331Gln)	5		DCM	944	2	1	rs59301204	3/245554=0	0/15170=0	0/33572=0	0/9822=0	0/17230=0	0/22260=0	2/111248=0	1/30778=0	0/5474=0	1	1	1	deleterious	0.04	benign	0.274	43	26.5
821	both	LMNA	NM_170707.3	c.992G>A	p.(Arg331Gln)	5		UCM	945	2	1	rs59301204	3/245554=0	0/15170=0	0/33572=0	0/9822=0	0/17230=0	0/22260=0	2/111248=0	1/30778=0	0/5474=0	1	1	1	deleterious	0.04	benign	0.274	43	26.5
822	both	LMNA	NM_170707.3	c.1003C>T	p.(Arg335Trp)	4		UCM	929	1	1	rs386134243										-2	-3	-4	deleterious	0.01	probably_damaging	0.964	101	34
823	both	LMNA	NM_170707.3	c.1189C>T	p.(Arg397Cys)	4		DCM	582	1	1	rs374726751	7/274546=0	1/23902=0	0/34390=0	0/10126=0	0/18834=0	0/24168=0	4/125912=0	2/30776=0	0/6438=0	-3	-3	-4	tolerated	0.06		possibly damaging	0.54	180
824	both	LMNA	NM_170707.3	c.725C>T	p.(Ala242Val)	4		UCM	938	1	1	rs397516387	1/246228=0	0/15304=0	0/33582=0	0/9848=0	0/17248=0	0/22300=0	1/111680=0	0/30782=0	0/5484=0	0	0	0	deleterious	0.02	probably_damaging	0.974	64	28.6
825	both	LMNA	NM_170707.3	c.725C>T	p.(Ala242Val)	4		DCM	939	2	1	rs201580443	32/277072=0	0/24016=0	0/34410=0	0/10152=0	24/18870=0.001	0/25732=0	6/126644=0	2/30782=0	0/6466=0	-1	-1	-1	tolerated	0.26	benign	0.01	81	15.28
826	both	LMNA	NM_170707.3	c.992G>A	p.(Arg331Gln)	4	5 (cosegregation)	Other indication	579	1	1	rs59301204	3/245554=0	0/15170=0	0/33572=0	0/9822=0	0/17230=0	0/22260=0	2/111248=0	1/30778=0	0/5474=0	1	1	1	deleterious	0.04		benign	0.274	43
827	both	LMNA	NM_170707.3	c.992G>A	p.(Arg331Gln)	4	5 (cosegregation)	UCM	580	1	1	rs59301204	3/245554=0	0/15170=0	0/33572=0	0/9822=0	0/17230=0	0/22260=0	2/111248=0	1/30778=0	0/5474=0	1	1	1	deleterious	0.04		benign	0.274	43
828	both	LMNA	NM_170707.3	c.992G>A	p.(Arg331Gln)	4	5 (cosegregation)	UCM	581	1	1	rs59301204	3/245554=0	0/15170=0	0/33572=0	0/9822=0	0/17230=0	0/22260=0	2/111248=0	1/30778=0	0/5474=0	1	1	1	deleterious	0.04		benign	0.274	43
829	both	LMNA	NM_170707.3	c.992G>A	p.(Arg331Gln)	4	5 (cosegregation)	UCM	943	2	1	rs59301204	3/245554=0	0/15170=0	0/33572=0	0/9822=0	0/17230=0	0/22260=0	2/111248=0	1/30778=0	0/5474=0	1	1	1	deleterious	0.04	benign	0.274	43	26.5
830	both	LMNA	NM_170707.3	c.1001G>A	p.(Ser334Asn)	3		(A)SCD	69	1	1	rs370656306	6/276484=0	0/23838=0	1/34412=0	0/10122=0	0/18856=0	0/25772=0	5/126250=0	0/30782=0	0/6452=0	1	1	0	tolerated	0.31	benign	0.005	46	18.11
831	both	LMNA	NM_170707.3	c.1001G>A	p.(Ser334Asn)	3		DCM	927	1	1	rs370656306	6/276484=0	0/23838=0	1/34412=0	0/10122=0	0/18856=0	0/25772=0	5/126250=0	0/30782=0	0/6452=0	1	1	0	tolerated	0.32	benign	0.012	46	22.5
832	both	LMNA	NM_170707.3	c.1001G>A	p.(Ser334Asn)	3		UCM	928	1	1	rs370656306	6/276484=0	0/23838=0	1/34412=0	0/10122=0	0/18856=0	0/25772=0	5/126250=0	0/30782=0	0/6452=0	1	1	0	tolerated	0.32	benign	0.012	46	22.5
833	both	LMNA	NM_170707.3	c.1004G>A	p.(Arg335Gln)	3		NCCM	1516	6	1	rs138592977	19/276432=0	1/23818=0	1/34410=0	0/10118=0	2/18856=0	3/25766=0	9/126230=0	2/30782=0	1/6452=0	1	1	1	tolerated	0.06	benign	0.094	43	23.7
834	both	LMNA	NM_170707.3	c.1255C>T	p.(Arg419Cys	3		ARVC	649	1	1	rs755686359	6/276478=0	1/24000=0	0/34414=0	0/10150=0	0/18866=0	0/25220=0	4/126596=0	1/30780=0	0/6452=0	-3	-3	-4	deleterious	0.01		probably damaging	0.987	180
835	both	LMNA	NM_170707.2	c.1259A>G	p.(Lys420Arg)	3		HCM	931	3	1											3	2	2	tolerated	1	benign	0.001	26	19.95
836	both	LMNA	NM_170707.3	c.1280G>A	p.(Arg427His)	3		UA	70	1	1	rs747139279	1/276622=0	0/23996=0	0/34418=0	0/10146=0	0/18860=0	0/25434=0	1/126528=0	0/30782=0	0/6458=0	0	0	0	tolerated	0.1	possibly damaging	0.935	29	23.6
837	both	LMNA	NM_170707.3	c.1303C>T	p.(Arg435Cys)	3		HCM	453	2	2	rs150840924	2/245276=0	0/15196=0	0/33554=0	0/9830=0	0/17230=0	0/22074=0	2/111156=0	0/30770=0	0/5466=0	-3	-3	-4	deleterious	0		possibly damaging	0.723	180
838	both	LMNA	NM_170707.3	c.1303C>T	p.(Arg435Cys)	3		NCCM	650	1	1	rs150840924	2/245276=0	0/15196=0	0/33554=0	0/9830=0	0/17230=0	0/22074=0	2/111156=0	0/30770=0	0/5466=0	0	0	0	tolerated	0.87		benign	0.3	58
839	both	LMNA	NM_170707.2	c.1303C>T	p.(Arg435Cys)	3		DCM	932	2	1	rs150840924	2/245276=0	0/15196=0	0/33554=0	0/9830=0	0/17230=0	0/22074=0	2/111156=0	0/30770=0	0/5466=0	-3	-3	-4	deleterious	0	possibly_damaging	0.88	180	32
840	both	LMNA	NM_170707.2	c.1303C>T	p.(Arg435Cys)	3		DCM	933	2	1	rs150840924	2/245276=0	0/15196=0	0/33554=0	0/9830=0	0/17230=0	0/22074=0	2/111156=0	0/30770=0	0/5466=0	-3	-3	-4	deleterious	0	possibly_damaging	0.88	180	32
841	both	LMNA	NM_170707.3	c.161C>T	p.(Thr54Met)	3		Other indication	67	1	1	rs879253992	1/209396=0	0/11914=0	0/29778=0	0/9132=0	1/15000=0	0/18886=0	0/92548=0	0/27342=0	0/4796=0	-1	-1	-1	tolerated	0.24	possibly damaging	0.793	81	23.1
842	both	LMNA	NM_170707.3	c.161C>T	p.(Thr54Met)	3		HCM	1083	3	2	rs879253992	1/209396=0	0/11914=0	0/29778=0	0/9132=0	1/15000=0	0/18886=0	0/92548=0	0/27342=0	0/4796=0	-1	-1	-1	tolerated	0.25	benign	0.227	81	23.0
843	both	LMNA	NM_170707.3	c.161C>T	p.(Thr54Met)	3		DCM	1515	3	2	rs879253992	1/209396=0	0/11914=0	0/29778=0	0/9132=0	1/15000=0	0/18886=0	0/92548=0	0/27342=0	0/4796=0	-1	-1	-1	tolerated	0.25	benign	0.227	81	23.0
844	both	LMNA	NM_170707.3	c.1634G>A	p.(Arg545His)	3		UA	71	1	1	rs142191737	43/186044=0	1/17220=0	2/24938=0	0/8606=0	0/12772=0	0/18654=0	38/75898=0.001	1/23038=0	1/4918=0	0	0	0	tolerated	0.14	probably damaging	0.999	29	24.0
845	both	LMNA	NM_170707.3	c.1634G>A	p.(Arg545His)	3		CPVT	301	3	2	rs142191737	43/186044=0	1/17220=0	2/24938=0	0/8606=0	0/12772=0	0/18654=0	38/75898=0.001	1/23038=0	1/4918=0	0	0	0	tolerated	0.14	probably_damaging	0.926	29	26.7
846	both	LMNA	NM_170707.2	c.1660G>A	p.(Glu554Lys)	3		DCM	935	1	1	rs71630616	0/154224=0	0/8392=0	0/24080=0	0/8286=0	0/11140=0	0/15042=0	0/60346=0	0/23018=0	0/3920=0	1	1	1	deleterious	0.01	benign	0.132	56	23.0
847	both	LMNA	NM_170707.3	c.1745G>A	p.(Arg582His)	3		UA	268	3	2	rs57830985	3/269168=0	1/23182=0	0/34292=0	0/9972=0	0/18708=0	0/25224=0	2/120826=0	0/30620=0	0/6344=0	0	0	0	deleterious	0	probably_damaging	0.914	29	32
848	both	LMNA	NM_170707.3	c.1756G>A	p.(Val586Met)	3		UA	270	3	1	rs758048062	3/239302=0	1/14534=0	0/33418=0	0/9680=0	0/17102=0	0/21718=0	2/106876=0	0/30600=0	0/5374=0	1	1	1	deleterious	0	possibly_damaging	0.482	21	25.6
849	both	LMNA	NM_170707.3	c.1756G>A	p.(Val586Met)	3		CPVT	1548	2	1	rs758048062	3/239302=0	1/14534=0	0/33418=0	0/9680=0	0/17102=0	0/21718=0	2/106876=0	0/30600=0	0/5374=0	1	1	1	deleterious	0	possibly_damaging	0.482	21	25.6
850	both	LMNA	NM_170707.3	c.1756G>A	p.(Val586Met)	3		UCM	1549	2	1	rs758048062	3/239302=0	1/14534=0	0/33418=0	0/9680=0	0/17102=0	0/21718=0	2/106876=0	0/30600=0	0/5374=0	1	1	1	deleterious	0	possibly_damaging	0.482	21	25.6
851	both	LMNA	NM_170707.3	c.1786_1800del	p.(Asp596_Ala600del)	3		NCCM	936	2	1														NA	NA	NA	NA	NA	22.1
852	both	LMNA	NM_170707.2	c.1804G>A	p.(Gly602Ser)	3		HCM	497	2	1	rs60662302	68/272886=0	58/23414=0.002	5/34314=0	0/10038=0	0/18772=0	0/25282=0	1/124084=0	3/30614=0	1/6368=0	0	0	-1	tolerated	1		benign	0	56
853	both	LMNA	NM_170707.3	c.1879C>T	p.(Arg627Cys)	3		DCM	416	3	2	rs777841827	9/274666=0	0/23668=0	2/34368=0	0/10088=0	0/18808=0	0/25572=0	7/125012=0	0/30742=0	0/6408=0	-3	-3	-4	deleterious	0		possibly damaging	0.749	180
854	both	LMNA	NM_170707.3	c.1879C>T	p.(Arg627Cys)	3		DCM	651	1	1	rs777841827	9/274666=0	0/23668=0	2/34368=0	0/10088=0	0/18808=0	0/25572=0	7/125012=0	0/30742=0	0/6408=0	-3	-3	-4	deleterious	0		possibly damaging	0.749	180
855	both	LMNA	NM_170707.3	c.308A>G	p.(Gln103Arg)	3		HCM	937	1	1											1	1	1	deleterious	0	possibly_damaging	0.688	43	28.6
856	both	LMNA	NM_170707.2	c.725C>T	p.(Ala242Val)	3	4 (more patients/families)	DCM	648	1	1	rs397517906	2/246234=0	0/15302=0	0/33582=0	0/9848=0	0/17248=0	0/22276=0	0/111710=0	2/30782=0	0/5486=0	0	0	0	deleterious	0.01		possibly damaging	0.657	64
857	both	LMNA	NM_170707.2	c.884C>T	p.(Ser295Leu)	3		DCM	940	3	1	rs769210828	7/276586=0	0/23952=0	1/34404=0	0/10142=0	0/18842=0	0/25770=0	4/126254=0	1/30770=0	1/6452=0	-3	-2	-3	deleterious	0	benign	0.019	145	23.8
858	both	LMNA	NM_170707.3	c.887G>A	p.(Val964Leu)	3		DCM	1078	2	2											0	0	0	tolerated	0.07	benign	0.373	29	23.4
859	both	LMNA	NM_170707.3	c.952G>A	p.(Ala318Thr)	3		UA	68	1	1	rs267607574	5/275256=0	0/23636=0	0/34396=0	0/10088=0	0/18822=0	0/25620=0	5/125494=0	0/30768=0	0/6432=0	0	0	0	tolerated	0.87	benign	0.42	58	15.96
860	both	LMNA	NM_170707.2	c.976T>A	p.(Ser326Thr)	3		DCM	941	2	1	rs56851164	16/276344=0	1/23848=0	0/34404=0	0/10120=0	0/18842=0	0/25746=0	15/126146=0	0/30782=0	0/6456=0	2	1	1	tolerated	0.65	benign	0.003	58	17.35
861	CM	MIB1	NM_020774.3	c.1588C>T	p.(Arg530*)	4		HCM	947	1	1	rs201850378	12/277074=0	2/24026=0	1/34412=0	0/10148=0	0/18856=0	0/25794=0	8/126592=0	1/30782=0	0/6464=0	-5	-4	-6	NA	NA	NA	NA	NA	35
862	CM	MIB1	NM_020774.2	c.2827G>T	p.(Val943Phe)	4		DCM	951	6	1	rs200035428	46/277072=0	4/24030=0	19/34384=0.001	0/10148=0	0/18864=0	0/25788=0	17/126636=0	5/30762=0	1/6460=0	0	-1	-1	tolerated	0.22	benign	0.163	50	23.2
863	CM	MIB1	NM_020774.3	c.1225A>G	p.(Asn409Asp)	3		UCM	839	2	2	rs775320402	3/276520=0	0/24014=0	0/34282=0	0/10124=0	0/18858=0	0/25746=0	3/126338=0	0/30714=0	0/6444=0	2	1	1	tolerated	0.14	benign	0.015	23	23.1
864	CM	MIB1	NM_020774.3	c.1225A>G	p.(Asn409Asp)	3		UCM	841	3	2	rs775320402	3/276520=0	0/24014=0	0/34282=0	0/10124=0	0/18858=0	0/25746=0	3/126338=0	0/30714=0	0/6444=0	2	1	1	tolerated	0.14	benign	0.015	23	23.1
865	CM	MIB1	NM_020774.3	c.1237+6T>C	p.?	3		HCM	1524	4	3	rs200252680	9/276128=0	0/24016=0	0/34270=0	0/10100=0	0/18852=0	0/25678=0	9/126108=0	0/30676=0	0/6428=0				NA	NA	NA	NA	NA	23.4
866	CM	MIB1	NM_020774.2	c.1359A>G	p.(Ser1776Gly)	3		HCM	1103	3	3														NA	NA	NA	NA	NA	13.74
867	CM	MIB1	NM_020774.3	c.1371+4A>C	p.?	3		DCM	946	3	1	rs751678416													NA	NA	NA	NA	NA	22.4
868	CM	MIB1	NM_020774.3	c.2285A>G	p.(Asn762Ser)	3		DCM	948	2	1	rs766910290	1/246218=0	0/15304=0	1/33576=0	0/9848=0	0/17248=0	0/22300=0	0/111676=0	0/30782=0	0/5484=0	1	1	0	tolerated	0.29	possibly_damaging	0.678	46	23.7
869	CM	MIB1	NM_020774.3	c.2322A>G	p.(=)	3	1 (RNA-analysis)	DCM	843	4	2	rs528727555	17/246188=0	0/15304=0	7/33568=0	0/9848=0	2/17244=0	0/22300=0	2/111660=0	6/30782=0	0/5482=0				NA	NA	NA	NA	NA	8575
870	CM	MIB1	NM_020774.3	c.2322A>G	p.(=)	3	1 (RNA-analysis)	NCCM	845	4	2	rs528727555	17/246188=0	0/15304=0	7/33568=0	0/9848=0	2/17244=0	0/22300=0	2/111660=0	6/30782=0	0/5482=0				NA	NA	NA	NA	NA	8575
871	CM	MIB1	NM_020774.3	c.2322A>G	p.(=)	3	1 (RNA-analysis)	NCCM	949	1	1	rs528727555	17/246188=0	0/15304=0	7/33568=0	0/9848=0	2/17244=0	0/22300=0	2/111660=0	6/30782=0	0/5482=0				NA	NA	NA	NA	NA	8575
872	CM	MIB1	NM_020774.2	c.2411G>A	p.(Arg804Gln)	3		DCM	652	1	1	rs200809199	77/245960=0	3/22178=0	11/26418=0	0/8886=0	0/16056=0	0/25132=0	59/116660=0.001	1/24976=0	3/5654=0.001	1	1	1	tolerated	0.59		benign	0.003	43
873	CM	MIB1	NM_020774.2	c.2411G>A	p.(Arg804Gln)	3		DCM	950	1	1	rs200809199	77/245960=0	3/22178=0	11/26418=0	0/8886=0	0/16056=0	0/25132=0	59/116660=0.001	1/24976=0	3/5654=0.001	1	1	1	tolerated	0.59	benign	0.003	43	22.9
874	CM	MIB1	NM_020774.2	c.674C>G	p.(Ser225Cys)	3		UCM	493	2	2	rs571617380	2/276582=0	0/24026=0	0/34396=0	0/10148=0	0/18866=0	0/25594=0	2/126320=0	0/30780=0	0/6452=0	-1	-1	-2	tolerated	0.18		benign	0.085	112
875	CM	MIB1	NM_020774.3	c.81del	p.(Lys28Serfs*23)	3		DCM	952	2	1		0/236790=0	0/14014=0	0/33170=0	0/9592=0	0/16784=0	0/21298=0	0/106420=0	0/30258=0	0/5254=0	#N/A	#N/A	#N/A	NA	NA	NA	NA	NA	33
876	CM	MYBPC3	NM_000256.3	c.1000G>T	p.(Glu334*)	5		HCM	953	3	1	rs573916965										-5	-4	-6	NA	NA	NA	NA	NA	39
877	CM	MYBPC3	NM_000256.3	c.1351+1G>A	p.?	5		HCM	955	2	1	rs727503204													NA	NA	NA	NA	NA	27.1
878	CM	MYBPC3	NM_000256.3	c.1458-1G>C	p.?	5		HCM	518	1	1	rs397515903	1/245876=0	0/15292=0	0/33556=0	0/9804=0	0/17246=0	0/22262=0	0/111482=0	1/30758=0	0/5476=0	NA	NA	NA	NA	NA		NA	NA	NA
879	CM	MYBPC3	NM_000256.3	c.1458-6G>A	p.?	5		HCM	957	2	1	rs375347534													NA	NA	NA	NA	NA	6697
880	CM	MYBPC3	NM_000256.3	c.1484G>A	p.(Arg495Gln)	5		HCM	433	2	1	rs200411226	5/246204=0	0/15296=0	0/33578=0	0/9844=0	1/17246=0	0/22300=0	4/111680=0	0/30780=0	0/5480=0	1	1	1	tolerated	0.14		possibly damaging	0.895	43	16.70
881	CM	MYBPC3	NM_000256.3	c.1484G>A	p.(Arg495Gln)	5		HCM	520	1	1	rs200411226	5/246204=0	0/15296=0	0/33578=0	0/9844=0	1/17246=0	0/22300=0	4/111680=0	0/30780=0	0/5480=0	1	1	1	tolerated	0.14		possibly damaging	0.895	43	35
882	CM	MYBPC3	NM_000256.3	c.1484G>A	p.(Arg495Gln)	5		NCCM	519	1	1	rs200411226	5/246204=0	0/15296=0	0/33578=0	0/9844=0	1/17246=0	0/22300=0	4/111680=0	0/30780=0	0/5480=0	1	1	1	tolerated	0.14		possibly damaging	0.895	43
883	CM	MYBPC3	NM_000256.3	c.1484G>A	p.(Arg495Gln)	5		HCM	961	1	1	rs200411226	5/246204=0	0/15296=0	0/33578=0	0/9844=0	1/17246=0	0/22300=0	4/111680=0	0/30780=0	0/5480=0	1	1	1	deleterious	0.03	possibly_damaging	0.895	43	28.7
884	CM	MYBPC3	NM_000256.3	c.1505G>A	p.(Arg502Gln)	5		UCM	434	2	1	rs397515907										1	1	1	deleterious	0.01		probably damaging	0.971	43	22.1
885	CM	MYBPC3	NM_000256.3	c.1831G>A	p.(Glu611Lys)	5		UCM	964	3	1	rs730880555	6/252068=0	0/21718=0	0/31896=0	0/9678=0	0/17200=0	0/23788=0	5/114352=0	1/27436=0	0/6000=0	1	1	1	deleterious	0.01	possibly_damaging	0.686	56	28.7
886	CM	MYBPC3	NM_000256.3	c.1831G>A	p.(Glu611Lys)	5		HCM	965	3	1	rs730880555	6/252068=0	0/21718=0	0/31896=0	0/9678=0	0/17200=0	0/23788=0	5/114352=0	1/27436=0	0/6000=0	1	1	1	deleterious	0.01	possibly_damaging	0.686	56	28.7
887	CM	MYBPC3	NM_000256.3	c.1831G>A	p.(Glu611Lys)	5		HCM	966	3	1	rs730880555	6/252068=0	0/21718=0	0/31896=0	0/9678=0	0/17200=0	0/23788=0	5/114352=0	1/27436=0	0/6000=0	1	1	1	deleterious	0.01	possibly_damaging	0.686	56	28.7
888	CM	MYBPC3	NM_000256.3	c.2067+1G>T	p.?	5		HCM	1558	2	1														NA	NA	NA	NA	NA	28.0
889	CM	MYBPC3	NM_000256.3	c.2149-2del	p.?	5		HCM	435	2	1	rs748128261										NA	NA	NA	NA	NA		NA	NA	NA	27.3
890	CM	MYBPC3	NM_000256.3	c.2149-2del	p.?	5		HCM	521	1	1	rs748128261										NA	NA	NA	NA	NA		NA	NA	NA	22.7
891	CM	MYBPC3	NM_000256.3	c.2308+1G>A	p.?	5		UCM	971	1	1	rs112738974													NA	NA	NA	NA	NA	34
892	CM	MYBPC3	NM_000256.3	c.2308+1G>A	p.?	5		DCM	1566	5	1	rs112738974													NA	NA	NA	NA	NA	34
893	CM	MYBPC3	NM_000256.3	c.2373dup	p.(Trp792Valfs*17)	5		HCM	414	3	1	rs796596743										NA	NA	NA	NA	NA		NA	NA	NA	28.3
894	CM	MYBPC3	NM_000256.3	c.2373dup	p.(Trp792Valfs*17)	5		HCM	415	3	1	rs796596743										NA	NA	NA	NA	NA		NA	NA	NA	33
895	CM	MYBPC3	NM_000256.3	c.2373dup	p.(Trp792Valfs*17)	5		HCM	436	2	1	rs796596743										NA	NA	NA	NA	NA		NA	NA	NA	27.1
896	CM	MYBPC3	NM_000256.3	c.2373dup	p.(Trp792Valfs*17)	5		HCM	437	2	1	rs796596743										NA	NA	NA	NA	NA		NA	NA	NA	15.53
897	CM	MYBPC3	NM_000256.3	c.2373dup	p.(Trp792Valfs*17)	5		HCM	439	2	1	rs796596743										NA	NA	NA	NA	NA		NA	NA	NA	26.3
898	CM	MYBPC3	NM_000256.3	c.2373dup	p.(Trp792Valfs*17)	5		HCM	522	1	1	rs796596743										NA	NA	NA	NA	NA		NA	NA	NA	25.1
899	CM	MYBPC3	NM_000256.3	c.2373dup	p.(Trp792Valfs*17)	5		HCM	523	1	1	rs796596743										NA	NA	NA	NA	NA		NA	NA	NA	9.346
900	CM	MYBPC3	NM_000256.3	c.2373dup	p.(Trp792Valfs*17)	5		HCM	524	1	1	rs796596743										NA	NA	NA	NA	NA		NA	NA	NA	34
901	CM	MYBPC3	NM_000256.3	c.2373dup	p.(Trp792Valfs*17)	5		HCM	525	1	1	rs796596743										NA	NA	NA	NA	NA		NA	NA	NA	23.6
902	CM	MYBPC3	NM_000256.3	c.2373dup	p.(Trp792Valfs*17)	5		HCM	526	1	1	rs796596743										NA	NA	NA	NA	NA		NA	NA	NA	NA
903	CM	MYBPC3	NM_000256.3	c.2373dup	p.(Trp792Valfs*17)	5		HCM	527	1	1	rs796596743										NA	NA	NA	NA	NA		NA	NA	NA	43
904	CM	MYBPC3	NM_000256.3	c.2373dup	p.(Trp792Valfs*17)	5		UCM	438	2	1	rs796596743										NA	NA	NA	NA	NA		NA	NA	NA	34
905	CM	MYBPC3	NM_000256.3	c.2373dup	p.(Trp792Valfs*17)	5		HCM	528	1	1	rs796596743										NA	NA	NA	NA	NA		NA	NA	NA	33
906	CM	MYBPC3	NM_000256.3	c.2373dup	p.(Trp792Valfs*17)	5		DCM	440	2	1	rs796596743										NA	NA	NA	NA	NA		NA	NA	NA	22.4
907	CM	MYBPC3	NM_000256.3	c.2373dup	p.(Trp792Valfs*17)	5		HCM	529	1	1	rs796596743										NA	NA	NA	NA	NA		NA	NA	NA	28.7
908	CM	MYBPC3	NM_000256.3	c.2373dup	p.(Trp792Valfs*17)	5		HCM	530	1	1	rs796596743										NA	NA	NA	NA	NA		NA	NA	NA	25.5
909	CM	MYBPC3	NM_000256.3	c.2373dup	p.(Trp792Valfs*17)	5		HCM	531	1	1	rs796596743										NA	NA	NA	NA	NA		NA	NA	NA	32
910	CM	MYBPC3	NM_000256.3	c.2373dup	p.(Trp792Valfs*17)	5		HCM	532	1	1	rs796596743										NA	NA	NA	NA	NA		NA	NA	NA	33
911	CM	MYBPC3	NM_000256.3	c.2373dup	p.(Trp792Valfs*17)	5		HCM	972	4	1	rs187830361													NA	NA	NA	NA	NA	34
912	CM	MYBPC3	NM_000256.3	c.2373dup	p.(Trp792Valfs*17)	5		HCM	973	2	1	rs187830361													NA	NA	NA	NA	NA	34
913	CM	MYBPC3	NM_000256.3	c.2373dup	p.(Trp792Valfs*17)	5		HCM	974	3	1	rs187830361													NA	NA	NA	NA	NA	34
914	CM	MYBPC3	NM_000256.3	c.2373dup	p.(Trp792Valfs*17)	5		HCM	975	1	1	rs187830361													NA	NA	NA	NA	NA	34
915	CM	MYBPC3	NM_000256.3	c.2373dup	p.(Trp792Valfs*17)	5		HCM	976	1	1	rs187830361													NA	NA	NA	NA	NA	34
916	CM	MYBPC3	NM_000256.3	c.2373dup	p.(Trp792Valfs*17)	5		UCM	977	2	1	rs187830361													NA	NA	NA	NA	NA	34
917	CM	MYBPC3	NM_000256.3	c.2373dup	p.(Trp792Valfs*17)	5		UCM	978	3	1	rs187830361													NA	NA	NA	NA	NA	34
918	CM	MYBPC3	NM_000256.3	c.2373dup	p.(Trp792Valfs*17)	5		HCM	979	2	1	rs187830361													NA	NA	NA	NA	NA	34
919	CM	MYBPC3	NM_000256.3	c.2373dup	p.(Trp792Valfs*17)	5		HCM	980	2	1	rs187830361													NA	NA	NA	NA	NA	34
920	CM	MYBPC3	NM_000256.3	c.2373dup	p.(Trp792Valfs*17)	5		HCM	981	2	1	rs187830361													NA	NA	NA	NA	NA	34
921	CM	MYBPC3	NM_000256.3	c.2373dup	p.(Trp792Valfs*17)	5		UCM	982	1	1	rs187830361													NA	NA	NA	NA	NA	34
922	CM	MYBPC3	NM_000256.3	c.2373dup	p.(Trp792Valfs*17)	5		HCM	983	3	1	rs187830361													NA	NA	NA	NA	NA	34
923	CM	MYBPC3	NM_000256.3	c.2373dup	p.(Trp792Valfs*17)	5		HCM	984	2	1	rs187830361													NA	NA	NA	NA	NA	34
924	CM	MYBPC3	NM_000256.3	c.2373dup	p.(Trp792Valfs*17)	5		HCM	985	1	1	rs187830361													NA	NA	NA	NA	NA	34
925	CM	MYBPC3	NM_000256.3	c.2373dup	p.(Trp792Valfs*17)	5		HCM	986	1	1	rs187830361													NA	NA	NA	NA	NA	34
926	CM	MYBPC3	NM_000256.3	c.2373dup	p.(Trp792Valfs*17)	5		HCM	987	2	1	rs187830361													NA	NA	NA	NA	NA	34
927	CM	MYBPC3	NM_000256.3	c.2373dup	p.(Trp792Valfs*17)	5		HCM	988	1	1	rs187830361													NA	NA	NA	NA	NA	34
928	CM	MYBPC3	NM_000256.3	c.2373dup	p.(Trp792Valfs*17)	5		HCM	989	2	1	rs187830361													NA	NA	NA	NA	NA	34
929	CM	MYBPC3	NM_000256.3	c.2373dup	p.(Trp792Valfs*17)	5		DCM	990	1	1	rs187830361													NA	NA	NA	NA	NA	34
930	CM	MYBPC3	NM_000256.3	c.2373dup	p.(Trp792Valfs*17)	5		HCM	991	2	1	rs187830361													NA	NA	NA	NA	NA	34
931	CM	MYBPC3	NM_000256.3	c.2373dup	p.(Trp792Valfs*17)	5		HCM	992	2	1	rs187830361													NA	NA	NA	NA	NA	34
932	CM	MYBPC3	NM_000256.3	c.2373dup	p.(Trp792Valfs*17)	5		UCM	993	1	1	rs187830361													NA	NA	NA	NA	NA	34
933	CM	MYBPC3	NM_000256.3	c.2373dup	p.(Trp792Valfs*17)	5		HCM	994	2	1	rs187830361													NA	NA	NA	NA	NA	34
934	CM	MYBPC3	NM_000256.3	c.2373dup	p.(Trp792Valfs*17)	5		HCM	995	1	1	rs187830361													NA	NA	NA	NA	NA	34
935	CM	MYBPC3	NM_000256.3	c.2373dup	p.(Trp792Valfs*17)	5		HCM	996	1	1	rs187830361													NA	NA	NA	NA	NA	34
936	CM	MYBPC3	NM_000256.3	c.2373dup	p.(Trp792Valfs*17)	5		HCM	997	1	1	rs187830361													NA	NA	NA	NA	NA	34
937	CM	MYBPC3	NM_000256.3	c.2373dup	p.(Trp792Valfs*17)	5		HCM	1567	2	1	rs187830361													NA	NA	NA	NA	NA	34
938	CM	MYBPC3	NM_000256.3	c.2373dup	p.(Trp792Valfs*17)	5		HCM	1568	1	1	rs187830361													NA	NA	NA	NA	NA	34
939	CM	MYBPC3	NM_000256.3	c.2459G>A	p.(Arg820Gln)	5		HCM	999	3	1	rs2856655	4/246198=0	0/15296=0	0/33580=0	0/9848=0	1/17248=0	0/22288=0	3/111676=0	0/30782=0	0/5480=0	1	1	1	deleterious	0	probably_damaging	0.971	43	31
940	CM	MYBPC3	NM_000256.3	c.2610dup	p.(Ser871Glnfs*13)	5		HCM	533	1	1	rs397515979										NA	NA	NA	NA	NA		NA	NA	NA	22.3
941	CM	MYBPC3	NM_000256.3	c.2761C>T	p.(Gln921*)	5		HCM	1000	3	1	rs367729718										-5	-4	-6	NA	NA	NA	NA	NA	38
942	CM	MYBPC3	NM_000256.3	c.2827C>T	p.(Arg943*)	5		HCM	441	2	1	rs387907267	3/244514=0	0/15142=0	0/33298=0	0/9798=0	0/17070=0	0/22236=0	1/110920=0	2/30626=0	0/5424=0	NA	NA	NA	NA	NA		NA	NA	NA	27.3
943	CM	MYBPC3	NM_000256.3	c.2827C>T	p.(Arg943*)	5		HCM	442	2	1	rs387907267	3/244514=0	0/15142=0	0/33298=0	0/9798=0	0/17070=0	0/22236=0	1/110920=0	2/30626=0	0/5424=0	NA	NA	NA	NA	NA		NA	NA	NA	18.55
944	CM	MYBPC3	NM_000256.3	c.2827C>T	p.(Arg943*)	5		HCM	534	1	1	rs387907267	3/244514=0	0/15142=0	0/33298=0	0/9798=0	0/17070=0	0/22236=0	1/110920=0	2/30626=0	0/5424=0	NA	NA	NA	NA	NA		NA	NA	NA	26.5
945	CM	MYBPC3	NM_000256.3	c.2827C>T	p.(Arg943*)	5		HCM	535	1	1	rs387907267	3/244514=0	0/15142=0	0/33298=0	0/9798=0	0/17070=0	0/22236=0	1/110920=0	2/30626=0	0/5424=0	NA	NA	NA	NA	NA		NA	NA	NA	25.8
946	CM	MYBPC3	NM_000256.3	c.2827C>T	p.(Arg943*)	5		HCM	536	1	1	rs387907267	3/244514=0	0/15142=0	0/33298=0	0/9798=0	0/17070=0	0/22236=0	1/110920=0	2/30626=0	0/5424=0	NA	NA	NA	NA	NA		NA	NA	NA	32
947	CM	MYBPC3	NM_000256.3	c.2827C>T	p.(Arg943*)	5		HCM	537	1	1	rs387907267	3/244514=0	0/15142=0	0/33298=0	0/9798=0	0/17070=0	0/22236=0	1/110920=0	2/30626=0	0/5424=0	NA	NA	NA	NA	NA		NA	NA	NA	29.1
948	CM	MYBPC3	NM_000256.3	c.2827C>T	p.(Arg943*)	5		HCM	1001	2	1	rs387907267	3/244514=0	0/15142=0	0/33298=0	0/9798=0	0/17070=0	0/22236=0	1/110920=0	2/30626=0	0/5424=0	-5	-4	-6	NA	NA	NA	NA	NA	42
949	CM	MYBPC3	NM_000256.3	c.2827C>T	p.(Arg943*)	5		UCM	1002	2	1	rs387907267	3/244514=0	0/15142=0	0/33298=0	0/9798=0	0/17070=0	0/22236=0	1/110920=0	2/30626=0	0/5424=0	-5	-4	-6	NA	NA	NA	NA	NA	42
950	CM	MYBPC3	NM_000256.3	c.2827C>T	p.(Arg943*)	5		HCM	1003	2	1	rs387907267	3/244514=0	0/15142=0	0/33298=0	0/9798=0	0/17070=0	0/22236=0	1/110920=0	2/30626=0	0/5424=0	-5	-4	-6	NA	NA	NA	NA	NA	42
951	CM	MYBPC3	NM_000256.3	c.2827C>T	p.(Arg943*)	5		HCM	1004	2	1	rs387907267	3/244514=0	0/15142=0	0/33298=0	0/9798=0	0/17070=0	0/22236=0	1/110920=0	2/30626=0	0/5424=0	-5	-4	-6	NA	NA	NA	NA	NA	42
952	CM	MYBPC3	NM_000256.3	c.2827C>T	p.(Arg943*)	5		HCM	1005	3	1	rs387907267	3/244514=0	0/15142=0	0/33298=0	0/9798=0	0/17070=0	0/22236=0	1/110920=0	2/30626=0	0/5424=0	-5	-4	-6	NA	NA	NA	NA	NA	42
953	CM	MYBPC3	NM_000256.3	c.2827C>T	p.(Arg943*)	5		HCM	1006	3	1	rs387907267	3/244514=0	0/15142=0	0/33298=0	0/9798=0	0/17070=0	0/22236=0	1/110920=0	2/30626=0	0/5424=0	-5	-4	-6	NA	NA	NA	NA	NA	42
954	CM	MYBPC3	NM_000256.3	c.2827C>T	p.(Arg943*)	5		HCM	1007	3	1	rs387907267	3/244514=0	0/15142=0	0/33298=0	0/9798=0	0/17070=0	0/22236=0	1/110920=0	2/30626=0	0/5424=0	-5	-4	-6	NA	NA	NA	NA	NA	42
955	CM	MYBPC3	NM_000256.3	c.2827C>T	p.(Arg943*)	5		HCM	1570	2	2	rs387907267	3/244514=0	0/15142=0	0/33298=0	0/9798=0	0/17070=0	0/22236=0	1/110920=0	2/30626=0	0/5424=0	-5	-4	-6	NA	NA	NA	NA	NA	42
956	CM	MYBPC3	NM_000256.3	c.2842_2843del	p.(Asn948Tyrfs*102)	5		HCM	1008	3	1	rs121909376													NA	NA	NA	NA	NA	34
957	CM	MYBPC3	NM_000256.3	c.2864_2865del	p.(Pro955Argfs*95)	5		DCM	443	2	1	rs397515990	0/228566=0	0/13674=0	0/31426=0	0/9080=0	0/16146=0	0/20850=0	0/103456=0	0/28966=0	0/4968=0	NA	NA	NA	NA	NA		NA	NA	NA	NA
958	CM	MYBPC3	NM_000256.3	c.2864_2865del	p.(Pro955Argfs*95)	5		HCM	538	1	1	rs397515990	0/228566=0	0/13674=0	0/31426=0	0/9080=0	0/16146=0	0/20850=0	0/103456=0	0/28966=0	0/4968=0	NA	NA	NA	NA	NA		NA	NA	NA	36
959	CM	MYBPC3	NM_000256.3	c.2864_2865del	p.(Pro955Argfs*95)	5		HCM	539	1	1	rs397515990	0/228566=0	0/13674=0	0/31426=0	0/9080=0	0/16146=0	0/20850=0	0/103456=0	0/28966=0	0/4968=0	NA	NA	NA	NA	NA		NA	NA	NA	NA
960	CM	MYBPC3	NM_000256.3	c.2864_2865del	p.(Pro955Argfs*95)	5		HCM	1009	2	1	rs397515990	0/228566=0	0/13674=0	0/31426=0	0/9080=0	0/16146=0	0/20850=0	0/103456=0	0/28966=0	0/4968=0				NA	NA	NA	NA	NA	28.6
961	CM	MYBPC3	NM_000256.3	c.3181C>T	p.(Gln1061*)	5		UCM	540	1	1	rs397516005	4/267548=0	0/23966=0	0/34394=0	0/10136=0	0/18836=0	3/16578=0	0/126472=0	0/30782=0	1/6384=0	NA	NA	NA	NA	NA		NA	NA	NA	13.84
962	CM	MYBPC3	NM_000256.3	c.3190+5G>A	p.?	5		UCM	541	1	1	rs587782958	4/236140=0	1/15208=0	0/33548=0	0/9826=0	0/17200=0	0/12874=0	2/111318=0	1/30770=0	0/5396=0	NA	NA	NA	NA	NA		NA	NA	NA	11.36
963	CM	MYBPC3	NM_000256.3	c.3190+5G>A	p.?	5		HCM	1014	2	1	rs587782958	4/236140=0	1/15208=0	0/33548=0	0/9826=0	0/17200=0	0/12874=0	2/111318=0	1/30770=0	0/5396=0				NA	NA	NA	NA	NA	18.73
964	CM	MYBPC3	NM_000256.3	c.3288del	p.(Glu1096Aspfs*93)	5		HCM	1015	3	1	rs1052373													NA	NA	NA	NA	NA	31
965	CM	MYBPC3	NM_000256.3	c.3628-41_3628-17del	p.?	5		HCM	1018	1	1	rs36212066	999/276504=0.004	2/23970=0	3/34416=0	0/10146=0	5/18864=0	0/25790=0	2/126090=0	978/30772=0.032	9/6456=0.001				NA	NA	NA	NA	NA	12.93
966	CM	MYBPC3	NM_000256.3	c.3628-41_3628-17del	p.?	5		HCM	1019	2	1	rs36212066	999/276504=0.004	2/23970=0	3/34416=0	0/10146=0	5/18864=0	0/25790=0	2/126090=0	978/30772=0.032	9/6456=0.001				NA	NA	NA	NA	NA	12.93
967	CM	MYBPC3	NM_000256.3	c.3628-41_3628-17del	p.?	5		DCM	1020	3	1	rs36212066	999/276504=0.004	2/23970=0	3/34416=0	0/10146=0	5/18864=0	0/25790=0	2/126090=0	978/30772=0.032	9/6456=0.001				NA	NA	NA	NA	NA	12.93
968	CM	MYBPC3	NM_000256.3	c.3628-41_3628-17del	p.?	5		HCM	1021	3	1	rs36212066	999/276504=0.004	2/23970=0	3/34416=0	0/10146=0	5/18864=0	0/25790=0	2/126090=0	978/30772=0.032	9/6456=0.001				NA	NA	NA	NA	NA	12.93
969	CM	MYBPC3	NM_000256.3	c.3683_3684dup	p.(Met1229Alafs*9)	5		UCM	542	1	1											NA	NA	NA	NA	NA		NA	NA	NA	18.55
970	CM	MYBPC3	NM_000256.3	c.3697C>T	p.(Gln1233*)	5		UCM	543	1	1	rs397516037	2/246220=0	0/15282=0	0/33582=0	0/9850=0	0/17246=0	0/22298=0	2/111700=0	0/30782=0	0/5480=0	NA	NA	NA	NA	NA		NA	NA	NA	22.5
971	CM	MYBPC3	NM_000256.3	c.3776del	p.(Gln1259Argfs*72)	5		UCM	544	1	1	rs727503166										NA	NA	NA	NA	NA		NA	NA	NA	25.4
972	CM	MYBPC3	NM_000256.3	c.3776del	p.(Gln1259Argfs*72)	5		HCM	1023	3	1	rs727503166													NA	NA	NA	NA	NA	35
973	CM	MYBPC3	NM_000256.3	c.3776delA	p.(Gln1259fs)	5		HCM	545	1	1	rs727503166										NA	NA	NA	NA	NA		NA	NA	NA	NA
974	CM	MYBPC3	NM_000256.3	c.442G>A	p.(Gly148Arg)	5		HCM	1024	3	1	rs397516050	13/195392=0	0/17484=0	0/26034=0	0/8746=0	0/13024=0	0/20488=0	13/81132=0	0/23384=0	0/5100=0	-2	-2	-3	tolerated	0.19	benign	0.07	125	10.59
975	CM	MYBPC3	NM_000256.3	c.442G>A	p.(Gly148Arg)	5		HCM	1025	1	1	rs397516050	13/195392=0	0/17484=0	0/26034=0	0/8746=0	0/13024=0	0/20488=0	13/81132=0	0/23384=0	0/5100=0	-2	-2	-3	tolerated	0.19	benign	0.07	125	10.59
976	CM	MYBPC3	NM_000256.3	c.442G>A	p.(Gly148Arg)	5		HCM	1596	1	1	rs397516050	13/195392=0	0/17484=0	0/26034=0	0/8746=0	0/13024=0	0/20488=0	13/81132=0	0/23384=0	0/5100=0	-2	-2	-3	tolerated	0.19	benign	0.07	125	10.59
977	CM	MYBPC3	NM_000256.3	c.481C>T	p.(Pro161Ser)	5		HCM	431	2	1	rs397516053	1/167318=0	0/8954=0	0/25596=0	0/8502=0	0/11516=0	0/16968=0	1/68078=0	0/23548=0	0/4156=0	-1	-1	-1	deleterious	0.01		probably damaging	0.975	74
978	CM	MYBPC3	NM_000256.3	c.481C>T	p.(Pro161Ser)	5		HCM	516	1	1	rs397516053	1/167318=0	0/8954=0	0/25596=0	0/8502=0	0/11516=0	0/16968=0	1/68078=0	0/23548=0	0/4156=0	-1	-1	-1	deleterious	0.01		probably damaging	0.975	74
979	CM	MYBPC3	NM_000256.3	c.481C>T	p.(Pro161Ser)	5		HCM	1027	3	1	rs397516053	1/167318=0	0/8954=0	0/25596=0	0/8502=0	0/11516=0	0/16968=0	1/68078=0	0/23548=0	0/4156=0	-1	-1	-1	deleterious	0.01	probably_damaging	0.968	74	24.3
980	CM	MYBPC3	NM_000256.3	c.897del	p.(Lys301Argfs*49)	5		HCM	1032	1	1														NA	NA	NA	NA	NA	26.9
981	CM	MYBPC3	NM_000256.3	c.897del	p.(Lys301Argfs*49)	5		HCM	1033	1	1														NA	NA	NA	NA	NA	26.9
982	CM	MYBPC3	NM_000256.3	c.897del	p.(Lys301Argfs*49)	5		HCM	1034	2	1														NA	NA	NA	NA	NA	26.9
983	CM	MYBPC3	NM_000256.3	c.897del	p.(Lys301Argfs*49)	5		HCM	1531	3	3														NA	NA	NA	NA	NA	26.9
984	CM	MYBPC3	NM_000256.3	c.927-2A>G	p.?	5		HCM	432	2	1	rs397516082	2/224970=0	0/20788=0	0/29034=0	0/7990=0	0/15980=0	0/22124=0	2/99490=0	0/24020=0	0/5544=0	NA	NA	NA	NA	NA		NA	NA	NA
985	CM	MYBPC3	NM_000256.3	c.927-2A>G	p.?	5		HCM	517	1	1	rs397516082	2/224970=0	0/20788=0	0/29034=0	0/7990=0	0/15980=0	0/22124=0	2/99490=0	0/24020=0	0/5544=0	NA	NA	NA	NA	NA		NA	NA	NA
986	CM	MYBPC3	NM_000256.3	c.927-2A>G	p.?	5		HCM	1035	1	1	rs397516082	2/224970=0	0/20788=0	0/29034=0	0/7990=0	0/15980=0	0/22124=0	2/99490=0	0/24020=0	0/5544=0				NA	NA	NA	NA	NA	25.6
987	CM	MYBPC3	NM_000256.3	c.927-2A>G	p.?	5		HCM	1574	3	3	rs397516082	2/224970=0	0/20788=0	0/29034=0	0/7990=0	0/15980=0	0/22124=0	2/99490=0	0/24020=0	0/5544=0				NA	NA	NA	NA	NA	25.6
988	CM	MYBPC3	NM_000256.3	c.1255C>T	p.(Arg419Cys)	4		DCM	583	1	1	rs368770848	8/271804=0	3/23310=0	0/33918=0	0/10028=0	3/18588=0	0/25248=0	2/124226=0	0/30110=0	0/6376=0	-3	-3	-4	deleterious	0		probably damaging	0.998	180	14.30
989	CM	MYBPC3	NM_000256.3	c.1468G>A	p.(Gly490Arg)	4		DCM	584	1	1	rs200625851	64/276996=0	2/24020=0	0/34416=0	0/10130=0	0/18866=0	7/25772=0	48/126568=0	7/30766=0	0/6458=0	-2	-2	-3	deleterious	0		probably damaging	0.997	125	16.65
990	CM	MYBPC3	NM_000256.3	c.1468G>A	p.(Gly490Arg)	4		UCM	585	1	1	rs200625851	64/276996=0	2/24020=0	0/34416=0	0/10130=0	0/18866=0	7/25772=0	48/126568=0	7/30766=0	0/6458=0	-2	-2	-3	deleterious	0		probably damaging	0.997	125	34
991	CM	MYBPC3	NM_000256.3	c.1468G>A	p.(Gly490Arg)	4		HCM	453	2	1	rs200625851	64/276996=0	2/24020=0	0/34416=0	0/10130=0	0/18866=0	7/25772=0	48/126568=0	7/30766=0	0/6458=0	-2	-2	-3	deleterious	0		probably damaging	0.997	125	34
992	CM	MYBPC3	NM_000256.3	c.2414-2A>G	p.?	4		HCM	998	4	1	rs751637847													NA	NA	NA	NA	NA	28.2
993	CM	MYBPC3	NM_000256.3	c.3065G>C	p.(Arg1022Pro)	4		DCM	586	1	1	rs397516000	7/274600=0	1/24002=0	0/34388=0	0/10070=0	0/18862=0	0/24098=0	6/126024=0	0/30738=0	0/6418=0	-2	-2	-2	deleterious	0.02		probably damaging	0.999	103	31
994	CM	MYBPC3	NM_000256.3	c.3065G>C	p.(Arg1022Pro)	4		HCM	587	1	1	rs397516000	7/274600=0	1/24002=0	0/34388=0	0/10070=0	0/18862=0	0/24098=0	6/126024=0	0/30738=0	0/6418=0	-2	-2	-2	deleterious	0.02		probably damaging	0.999	103	20.4
995	CM	MYBPC3	NM_000256.3	c.3065G>C	p.(Arg1022Pro)	4		HCM	588	1	1	rs397516000	7/274600=0	1/24002=0	0/34388=0	0/10070=0	0/18862=0	0/24098=0	6/126024=0	0/30738=0	0/6418=0	-2	-2	-2	deleterious	0.02		probably damaging	0.999	103	23.1
996	CM	MYBPC3	NM_000256.3	c.3065G>C	p.(Arg1022Pro)	4		HCM	1011	2	1	rs397516000	7/274600=0	1/24002=0	0/34388=0	0/10070=0	0/18862=0	0/24098=0	6/126024=0	0/30738=0	0/6418=0	-2	-2	-2	deleterious	0.01	probably_damaging	0.999	103	31
997	CM	MYBPC3	NM_000256.3	c.3065G>C	p.(Arg1022Pro)	4		HCM	1012	1	1	rs397516000	7/274600=0	1/24002=0	0/34388=0	0/10070=0	0/18862=0	0/24098=0	6/126024=0	0/30738=0	0/6418=0	-2	-2	-2	deleterious	0.01	probably_damaging	0.999	103	31
998	CM	MYBPC3	NM_000256.3	c.3065G>C	p.(Arg1022Pro)	4		HCM	1013	3	1	rs397516000	7/274600=0	1/24002=0	0/34388=0	0/10070=0	0/18862=0	0/24098=0	6/126024=0	0/30738=0	0/6418=0	-2	-2	-2	deleterious	0.01	probably_damaging	0.999	103	31
999	CM	MYBPC3	NM_000256.3	c.3640T>C	p.(Trp1214Arg)	4		HCM	454	2	1											-2	-3	-4	deleterious	0		probably damaging	1	101	32
1000	CM	MYBPC3	NM_000256.3	c.821+5G>A	p.?	4		HCM	1030	1	1	rs397516077													NA	NA	NA	NA	NA	18.76
1001	CM	MYBPC3	NM_000256.3	c.1246G>A	p.(Gly416Ser)	3		NCCM	654	1	1	rs371513491	29/271548=0	25/23284=0.001	2/33940=0	0/9992=0	1/18558=0	0/25216=0	1/124086=0	0/30116=0	0/6356=0	0	0	-1	deleterious	0.02		probably damaging	0.976	56	26.6
1002	CM	MYBPC3	NM_000256.3	c.1246G>A	p.(Gly416Ser)	3		UCM	1525	2	1	rs371513491	29/271548=0	25/23284=0.001	2/33940=0	0/9992=0	1/18558=0	0/25216=0	1/124086=0	0/30116=0	0/6356=0	0	0	-1	deleterious	0.01	probably_damaging	0.976	56	25.5
1003	CM	MYBPC3	NM_000256.3	c.1309G>A	p.(Val437Met)	3		UCM	954	2	1	rs730880535	4/274656=0	0/23676=0	1/34218=0	0/10090=0	0/18772=0	0/25448=0	3/125562=0	0/30468=0	0/6422=0	1	1	1	deleterious	0.04	benign	0.223	21	15.62
1004	CM	MYBPC3	NM_000256.3	c.1321G>C	p.(Glu441Gln)	3		DCM	655	1	1	rs193922377										2	2	2	deleterious	0		probably damaging	0.972	29	34
1005	CM	MYBPC3	NM_000256.3	c.1373G>A	p.(Arg458His)	3		HCM	499	2	1	rs374255707	14/273210=0	0/23740=0	2/34066=0	0/9940=0	2/18758=0	0/25486=0	9/124558=0	1/30278=0	0/6384=0	0	0	0	tolerated	0.11		benign	0.036	29	42
1006	CM	MYBPC3	NM_000256.3	c.137G>A	p.(Gly46Asp)	3		UCM	956	3	1	rs140403872	5/198348=0	0/17772=0	0/27416=0	0/8688=0	0/13884=0	0/19706=0	5/81320=0	0/24474=0	0/5088=0	-1	-1	-2	tolerated	0.31	benign	0.007	94	12.71
1007	CM	MYBPC3	NM_000256.3	c.1468G>A	p.(Gly490Arg)	3		DCM	958	1	1	rs200625851	64/276996=0	2/24020=0	0/34416=0	0/10130=0	0/18866=0	7/25772=0	48/126568=0	7/30766=0	0/6458=0	-2	-2	-3	deleterious	0	probably_damaging	0.997	125	28.0
1008	CM	MYBPC3	NM_000256.3	c.1468G>A	p.(Gly490Arg)	3		DCM	959	2	1	rs200625851	64/276996=0	2/24020=0	0/34416=0	0/10130=0	0/18866=0	7/25772=0	48/126568=0	7/30766=0	0/6458=0	-2	-2	-3	deleterious	0	probably_damaging	0.997	125	28.0
1009	CM	MYBPC3	NM_000256.3	c.1468G>A	p.(Gly490Arg)	3		HCM	960	2	1	rs200625851	64/276996=0	2/24020=0	0/34416=0	0/10130=0	0/18866=0	7/25772=0	48/126568=0	7/30766=0	0/6458=0	-2	-2	-3	deleterious	0	probably_damaging	0.997	125	28.0
1010	CM	MYBPC3	NM_000256.3	c.1513_1515del	p.(Lys505del)	3		DCM	962	1	1	rs727504287	3/277208=0	0/24024=0	1/34420=0	0/10152=0	0/18870=0	0/25794=0	2/126704=0	0/30782=0	0/6462=0				NA	NA	NA	NA	NA	20.4
1011	CM	MYBPC3	NM_000256.3	c.1519G>A	p.(Gly507Arg)	3		UCM	963	2	1	rs35736435	181/277186=0.001	114/24014=0.005	13/34420=0	0/10152=0	31/18870=0.002	0/25790=0	17/126696=0	2/30782=0	4/6462=0.001	-2	-2	-3	deleterious	0.01	probably_damaging	0.997	125	27.0
1012	CM	MYBPC3	NM_000256.3	c.1765C>T	p.(Arg589Cys)	3		DCM	1395	3	2		2/197602=0	0/11616=0	0/27524=0	0/9048=0	0/13718=0	0/19584=0	2/85180=0	0/26204=0	0/4728=0	-3	-3	-4	deleterious	0	probably_damaging	0.982	180	31
1013	CM	MYBPC3	NM_000256.3	c.1766G>A	p.(Arg589His)	3		HCM	1015	3	2	rs397515923	2/193348=0	0/11340=0	1/27058=0	0/8988=0	0/13410=0	0/19354=0	1/82732=0	0/25806=0	0/4660=0	0	0	0	deleterious	0.03	benign	0.379	29	25.8
1014	CM	MYBPC3	NM_000256.3	c.1783A>G	p.(Ile595Val)	3		HCM	656	1	1	rs730880550										3	3	3	tolerated	0.35		benign	0.06	29	28.4
1015	CM	MYBPC3	NM_000256.3	c.1831G>A	p.(Glu611Lys)	3	5 (more patients/families)	HCM	500	2	1	rs730880555	6/252068=0	0/21718=0	0/31896=0	0/9678=0	0/17200=0	0/23788=0	5/114352=0	1/27436=0	0/6000=0	1	1	1	deleterious	0.04		possibly damaging	0.686	56	0.218
1016	CM	MYBPC3	NM_000256.3	c.1855G>A	p.(Glu619Lys)	3		UCM	837	3	2	rs200352299	121/257462=0	2/22174=0	12/32532=0	54/9722=0.006	0/17552=0	0/24186=0	47/117184=0	1/27996=0	5/6116=0.001	1	1	1	deleterious	0.01	benign	0.426	56	23.8
1017	CM	MYBPC3	NM_000256.3	c.1855G>A	p.(Glu619Lys)	3		UCM	967	3	1	rs200352299	121/257462=0	2/22174=0	12/32532=0	54/9722=0.006	0/17552=0	0/24186=0	47/117184=0	1/27996=0	5/6116=0.001	1	1	1	deleterious	0.01	benign	0.426	56	23.8
1018	CM	MYBPC3	NM_000256.3	c.1885C>T	p.(Leu629Phe)	3		HCM	968	1	1											1	0	0	deleterious	0	possibly_damaging	0.677	22	28.1
1019	CM	MYBPC3	NM_000256.3	c.194C>T	p.(Thr65Met)	3		HCM	653	1	1	rs753300898	2/248994=0	0/21220=0	0/31934=0	0/9536=0	0/17006=0	0/23256=0	2/112556=0	0/27550=0	0/5936=0	-1	-1	-1	deleterious	0		probably damaging	0.963	81	23.6
1020	CM	MYBPC3	NM_000256.3	c.1984G>T	p.(Ala662Ser)	3		NCCM	501	2	1											1	1	1	tolerated	0.05		benign	0.217	32	29.4
1021	CM	MYBPC3	NM_000256.3	c.2024_2032del	p.(Gly675_Pro677del)	3		HCM	969	2	1														NA	NA	NA	NA	NA	22.0
1022	CM	MYBPC3	NM_000256.3	c.2063C>A	p.(Thr688Lys)	3		UCM	970	1	1	rs3729946	2/254804=0	0/22138=0	0/31488=0	0/9442=0	0/17370=0	0/24692=0	2/114930=0	0/28650=0	0/6094=0	-1	-1	-1	tolerated	0.52	benign	0.001	78	17.29
1023	CM	MYBPC3	NM_000256.3	c.206G>A	p.(Arg69Gln)	3		UCM	424	3	1	rs397515945	5/210130=0	0/11866=0	0/30212=0	0/9108=0	0/14640=0	0/19360=0	4/93286=0	1/26804=0	0/4854=0	1	1	1	tolerated	0.76		benign	0.004	43	22.4
1024	CM	MYBPC3	NM_000256.3	c.2311G>A	p.(Val771Met)	3		DCM	420	4	2	rs371488302	6/146054=0	1/7184=0	3/23930=0	0/8142=0	0/10210=0	0/16072=0	1/53886=0	0/22812=0	1/3818=0	1	1	1	deleterious	0		probably damaging	0.927	21	23.1
1025	CM	MYBPC3	NM_000256.3	c.2311G>A	p.(Val771Met)	3		UCM	425	3	1	rs371488302	6/146054=0	1/7184=0	3/23930=0	0/8142=0	0/10210=0	0/16072=0	1/53886=0	0/22812=0	1/3818=0	1	1	1	deleterious	0		probably damaging	0.927	21	12.09
1026	CM	MYBPC3	NM_000256.3	c.2327C>T	p.(Ala776Val)	3		ARVC	849	4	3		0/149440=0	0/7462=0	0/24042=0	0/8204=0	0/10304=0	0/16370=0	0/56288=0	0/22900=0	0/3870=0	0	0	0	tolerated	0.22	benign	0.041	64	15.31
1027	CM	MYBPC3	NM_000256.3	c.2429G>A	p.(Arg810His)homozygoot	3		HCM	657	1	1	rs375675796	12/246184=0	0/15298=0	0/33578=0	0/9844=0	0/17248=0	0/22278=0	11/111684=0	0/30776=0	1/5478=0	0	0	0	deleterious	0		probably damaging	0.999	29	25.8
1028	CM	MYBPC3	NM_000256.3	c.2783C>T	p.(Ser928Leu)	3		DCM	658	1	1	rs773819168	7/275754=0	0/23914=0	2/34210=0	0/10118=0	0/18726=0	0/25754=0	5/125954=0	0/30658=0	0/6420=0	-3	-2	-3	tolerated	0.08		benign	0.151	145	35
1029	CM	MYBPC3	NM_000256.3	c.2807C>T	p.(Thr936Met)	3		HCM	1573	2	1	rs374946555	11/275870=0	0/23912=0	6/34204=0	0/10118=0	0/18718=0	0/25752=0	2/126054=0	2/30682=0	1/6430=0	-1	-1	-1	deleterious	0.04	probably_damaging	0.992	81	28.4
1030	CM	MYBPC3	NM_000256.3	c.2815C>T	p.(Arg939Trp)	3		NCCM	502	2	1	rs534366414	9/275494=0	2/23868=0	1/34148=0	0/10116=0	0/18682=0	0/25734=0	6/125868=0	0/30648=0	0/6430=0	-2	-3	-4	deleterious	0		probably damaging	0.998	101	9.874
1031	CM	MYBPC3	NM_000256.3	c.2864C>A	p.(Pro955His)	3		HCM	1574	3	1											-2	-2	-3	deleterious	0	probably_damaging	0.997	77	23.7
1032	CM	MYBPC3	NM_000256.3	c.2877G>A	p.(Thr959Thr)	3		UCM	902	2	2	rs727503181	4/260322=0	1/23232=0	0/31888=0	0/9116=0	0/17826=0	0/24986=0	3/119108=0	0/28106=0	0/6060=0				NA	NA	NA	NA	NA	5302
1033	CM	MYBPC3	NM_000256.3	c.2909G>A	p.(Arg970Gln)	3		DCM	1010	4	1	rs727504346	11/211144=0	0/18564=0	6/27768=0	0/8930=0	0/14404=0	0/20916=0	5/90760=0	0/24518=0	0/5284=0	1	1	1	tolerated	0.35	benign	0.029	43	23.0
1034	CM	MYBPC3	NM_000256.3	c.2914C>T	p.(Arg972Trp)	3		HCM	1081	4	2	rs193922382	62/211092=0	56/18372=0.003	4/27792=0	0/8938=0	0/14438=0	0/20742=0	2/91002=0	0/24538=0	0/5270=0	-2	-3	-4	deleterious	0.05	benign	0.013	101	24.4
1035	CM	MYBPC3	NM_000256.3	c.2927C>G	p.(Pro976Arg)	3		NCCM	659	1	1											-2	-2	-2	deleterious	0		probably damaging	0.999	103	24.2
1036	CM	MYBPC3	NM_000256.3	c.3004C>T	p.(Arg1002Trp)	3		HCM	942	3	1	rs3729799	204/263622=0.001	182/23792=0.008	9/33788=0	0/9024=0	6/18812=0	0/21810=0	4/121722=0	2/28484=0	1/6190=0	-2	-3	-4	deleterious	0		probably damaging	1	101	32
1037	CM	MYBPC3	NM_000256.3	c.3004C>T	p.(Arg1002Trp)	3		HCM	479	2	2	rs3729799	204/263622=0.001	182/23792=0.008	9/33788=0	0/9024=0	6/18812=0	0/21810=0	4/121722=0	2/28484=0	1/6190=0	-2	-3	-4	deleterious	0		probably damaging	1	101
1038	CM	MYBPC3	NM_000256.3	c.3004C>T	p.(Arg1002Trp)	3		HCM	497	2	2	rs3729799	204/263622=0.001	182/23792=0.008	9/33788=0	0/9024=0	6/18812=0	0/21810=0	4/121722=0	2/28484=0	1/6190=0	-2	-3	-4	deleterious	0		probably damaging	1	101
1039	CM	MYBPC3	NM_000256.3	c.3004C>T	p.(Arg1002Trp)	3		HCM	498	2	2	rs3729799	204/263622=0.001	182/23792=0.008	9/33788=0	0/9024=0	6/18812=0	0/21810=0	4/121722=0	2/28484=0	1/6190=0	-2	-3	-4	deleterious	0		probably damaging	1	101	32
1040	CM	MYBPC3	NM_000256.3	c.3103G>A	p.(Ala1035Thr)	3		HCM	660	1	1	rs552505566	9/242692=0	1/15292=0	0/33564=0	0/9842=0	1/17238=0	0/18884=0	1/111636=0	5/30782=0	1/5454=0	0	0	0	tolerated	0.16		probably damaging	0.917	58
1041	CM	MYBPC3	NM_000256.3	c.3142C>A	p.(Arg1048Ser)	3		NCCM	1556	3	2	rs11570113	0/238936=0	0/15288=0	0/33568=0	0/9842=0	0/17230=0	0/15176=0	0/111628=0	0/30782=0	0/5422=0	-1	-1	-1	deleterious	0.03	benign	0.258	110	24.4
1042	CM	MYBPC3	NM_000256.3	c.3470C>T	p.(Pro1157Leu)	3		HCM	477	2	2	rs373304680	9/265142=0	0/22672=0	0/33136=0	0/9834=0	0/18260=0	0/24888=0	9/120996=0	0/29100=0	0/6256=0	-3	-3	-3	deleterious	0.04		benign	0.219	98
1043	CM	MYBPC3	NM_000256.3	c.3470C>T	p.(Pro1157Leu)	3		UCM	478	2	2	rs373304680	9/265142=0	0/22672=0	0/33136=0	0/9834=0	0/18260=0	0/24888=0	9/120996=0	0/29100=0	0/6256=0	-3	-3	-3	deleterious	0.04		benign	0.219	98
1044	CM	MYBPC3	NM_000256.3	c.3470C>T	p.(Pro1157Leu)	3		DCM	1016	1	1	rs373304680	9/265142=0	0/22672=0	0/33136=0	0/9834=0	0/18260=0	0/24888=0	9/120996=0	0/29100=0	0/6256=0	-3	-3	-3	tolerated	0.1	benign	0.148	98	23.4
1045	CM	MYBPC3	NM_000256.3	c.3470C>T	p.(Pro1157Leu)	3		UCM	1017	2	1	rs373304680	9/265142=0	0/22672=0	0/33136=0	0/9834=0	0/18260=0	0/24888=0	9/120996=0	0/29100=0	0/6256=0	-3	-3	-3	tolerated	0.1	benign	0.148	98	23.4
1046	CM	MYBPC3	NM_000256.3	c.3535G>A	p.(Glu1179Lys)	3		DCM	661	1	1	rs199669878	114/275732=0	2/23842=0	15/34322=0	20/10124=0.002	0/18818=0	0/25714=0	37/125762=0	40/30726=0.001	0/6424=0	1	1	1	tolerated	0.16		benign	0.326	56
1047	CM	MYBPC3	NM_000256.3	c.3682C>T	p.(Arg1228Cys)	3		HCM	503	2	1	rs201312636	57/277172=0	32/24010=0.001	4/34420=0	0/10150=0	1/18870=0	0/25794=0	19/126688=0	0/30782=0	1/6458=0	-3	-3	-4	deleterious	0.02		probably damaging	0.993	180
1048	CM	MYBPC3	NM_000256.3	c.3701G>T	p.(Gly1234Val)	3		HCM	1022	4	1											-3	-3	-4	deleterious	0	probably_damaging	0.999	109	29.8
1049	CM	MYBPC3	NM_000256.3	c.3742G>A	p.(Gly1248Arg)	3		DCM	662	1	1	rs202147520	8/246130=0	0/15278=0	0/33576=0	0/9848=0	1/17244=0	0/22300=0	6/111626=0	1/30780=0	0/5478=0	-2	-2	-3	tolerated	0.07		benign	0.344	125
1050	CM	MYBPC3	NM_000256.3	c.3800G>A	p.(Arg1267His)	3		UCM	1446	4	4	rs730880142	9/244074=0	0/15200=0	0/33440=0	0/9616=0	5/17230=0	1/22160=0	2/110380=0	1/30614=0	0/5434=0	0	0	0	deleterious	0	probably_damaging	0.953	29	30
1051	CM	MYBPC3	NM_000256.3	c.442G>A	p.(Gly148Arg)	3	5 (RNA analysis)	HCM	414	3	2	rs397516050	13/195392=0	0/17484=0	0/26034=0	0/8746=0	0/13024=0	0/20488=0	13/81132=0	0/23384=0	0/5100=0	-2	-2	-3	tolerated	0.34		benign	0.043	125	28.6
1052	CM	MYBPC3	NM_000256.3	c.442G>A	p.(Gly148Arg)	3	5 (RNA analysis)	UCM	461	2	2	rs397516050	13/195392=0	0/17484=0	0/26034=0	0/8746=0	0/13024=0	0/20488=0	13/81132=0	0/23384=0	0/5100=0	-2	-2	-3	tolerated	0.34		benign	0.043	125	22.8
1053	CM	MYBPC3	NM_000256.3	c.442G>A	p.(Gly148Arg)	3		HCM	1026	4	1	rs397516050	13/195392=0	0/17484=0	0/26034=0	0/8746=0	0/13024=0	0/20488=0	13/81132=0	0/23384=0	0/5100=0	-2	-2	-3	tolerated	0.19	benign	0.07	125	10.59
1054	CM	MYBPC3	NM_000256.3	c.640G>A	p.(Asp214Asn)	3		DCM	451	2	2	rs769167548	9/270058=0	5/23598=0	0/34314=0	0/10060=0	0/18812=0	0/20950=0	2/125482=0	2/30462=0	0/6380=0	2	1	1	deleterious	0.02		possibly damaging	0.628	23	23.4
1055	CM	MYBPC3	NM_000256.3	c.713G>A	p.(Arg238His)	3		DCM	481	2	2	rs727504396	26/244896=0	0/15114=0	17/33486=0.001	0/9824=0	6/17196=0	0/22194=0	2/110978=0	1/30656=0	0/5448=0	0	0	0	deleterious	0		probably damaging	0.999	29	33
1056	CM	MYBPC3	NM_000256.3	c.74G>A	p.(Ser25Asn)	3		HCM	423	3	1	rs371140684	17/265312=0	17/22664=0.001	0/33878=0	0/9842=0	0/18510=0	0/23370=0	0/120908=0	0/29928=0	0/6212=0	1	1	0	tolerated	0.14		possibly damaging	0.721	46	23.2
1057	CM	MYBPC3	NM_000256.3	c.787G>A	p.(Gly263Arg)	3		UCM	1028	1	1	rs373730381	17/209296=0	0/18316=0	0/27554=0	0/8942=0	7/14102=0	0/19842=0	4/91010=0	6/24200=0	0/5330=0	-2	-2	-3	tolerated	0.17	benign	0.098	125	17.21
1058	CM	MYBPC3	NM_000256.3	c.787G>A	p.(Gly263Arg)	3		ARVC	1029	2	1	rs373730381	17/209296=0	0/18316=0	0/27554=0	0/8942=0	7/14102=0	0/19842=0	4/91010=0	6/24200=0	0/5330=0	-2	-2	-3	tolerated	0.17	benign	0.098	125	17.21
1059	CM	MYBPC3	NM_000256.3	c.841C>A	p.(Arg281Arg)	3		UCM	1031	1	1	rs371711564													NA	NA	NA	NA	NA	10.46
1060	CM	MYBPC3	NM_000256.3	c.927-10C>T	p.?	3		ARVC	1155	2	2	rs201078659	5/177594=0	0/11266=0	0/26474=0	0/6902=0	0/13458=0	0/17468=0	5/76086=0	0/21708=0	0/4232=0				NA	NA	NA	NA	NA	0.060
1061	CM	MYBPC3	NM_000256.3	c.927-9G>A	p.?	3		HCM	1036	2	1	rs397516083	2/213814=0	0/20230=0	0/28070=0	1/7476=0	0/15294=0	0/21336=0	1/93688=0	0/22366=0	0/5354=0				NA	NA	NA	NA	NA	11.91
1062	CM	MYBPC3	NM_000256.3	c.971T>A	p.(Ile324Asn)	3		HCM	498	2	2											-2	-3	-4	tolerated	0.05		benign	0.03	149	34
1063	CM	MYBPC3	NM_000256.3	c.988C>A	p.(Pro330Thr)	3		ARVC	1037	1	1											-1	-1	-2	deleterious	0.04	possibly_damaging	0.806	38	23.5
1064	CM	MYH6	NM_002471.3	c.1007C>G	p.(Ala336Gly)	3		DCM	794	4	3	rs138572790	27/277066=0	0/24006=0	1/34420=0	0/10152=0	0/18868=0	1/25768=0	25/126612=0	0/30782=0	0/6458=0	0	0	0	deleterious	0.01	benign	0.003	60	23.2
1065	CM	MYH6	NM_002471.3	c.1007C>G	p.(Ala336Gly)	3		DCM	1245	3	3	rs138572790	27/277066=0	0/24006=0	1/34420=0	0/10152=0	0/18868=0	1/25768=0	25/126612=0	0/30782=0	0/6458=0	0	0	0	deleterious	0.01	benign	0.003	60	23.2
1066	CM	MYH6	NM_002471.3	c.1048G>A	p.(Val350Ile)	3		ARVC	807	5	3	rs200260629	22/277094=0	11/23998=0	2/34420=0	0/10152=0	0/18866=0	1/25784=0	8/126626=0	0/30782=0	0/6466=0	3	3	3	tolerated	1	benign	0.007	29	10.42
1067	CM	MYH6	NM_002471.3	c.1244G>C	p.(Gly415Ala)	3		HCM	1038	1	1	rs759520932	28/277232=0	0/24034=0	1/34420=0	23/10152=0.002	0/18870=0	0/25794=0	3/126712=0	0/30782=0	1/6468=0	0	0	0	deleterious	0.01	probably_damaging	0.999	60	24.9
1068	CM	MYH6	NM_002471.3	c.1334A>G	p.(Asn445Ser)	3		DCM	1391	3	2											1	1	0	deleterious	0.01	probably_damaging	0.996	46	24.7
1069	CM	MYH6	NM_002471.3	c.1545C>T	p.(Gly515Gly)	3		NCCM	663	1	1	rs200235378	1/246272=0	0/15304=0	0/33582=0	0/9850=0	0/17248=0	0/22300=0	0/111720=0	0/30782=0	1/5486=0	NA	NA	NA	NA	NA		NA	NA	NA
1070	CM	MYH6	NM_002471.3	c.160C>T	p.(Arg54Trp)	3		UCM	1039	1	1	rs369366244	6/277218=0	3/24036=0	1/34420=0	0/10152=0	2/18870=0	0/25788=0	0/126702=0	0/30782=0	0/6468=0	-2	-3	-4	deleterious	0	probably_damaging	0.975	101	24.3
1071	CM	MYH6	NM_002471.3	c.1628A>G	p.(Lys543Arg)	3		HCM	664	1	1	rs367663906	11/245822=0	0/15304=0	0/33582=0	0/9848=0	0/17248=0	0/22300=0	11/111276=0	0/30782=0	0/5482=0	3	2	2	deleterious	0.01		possibly damaging	0.767	26
1072	CM	MYH6	NM_002471.3	c.1970T>C	p.(Leu657Pro)	3		HCM	1040	4	1											-3	-3	-3	deleterious	0	probably_damaging	1	98	27.3
1073	CM	MYH6	NM_002471.3	c.2014G>C	p.(Val672Leu)	3		NCCM	1555	1	1											1	1	1	deleterious	0	probably_damaging	0.948	32	26.2
1074	CM	MYH6	NM_002471.3	c.2098G>A	p.(Val700Met)	3		DCM	1559	1	1	rs767142932	7/246250=0	1/15304=0	0/33578=0	0/9850=0	1/17248=0	0/22296=0	3/111706=0	2/30782=0	0/5486=0	1	1	1	deleterious	0	probably_damaging	0.971	21	27.2
1075	CM	MYH6	NM_002471.3	c.2292+1G>T	p.?	3		HCM	504	2	1	rs771569935	1/245962=0	0/15304=0	0/33582=0	0/9850=0	0/17248=0	0/22300=0	1/111416=0	0/30782=0	0/5480=0	NA	NA	NA	NA	NA		NA	NA	NA
1076	CM	MYH6	NM_002471.3	c.2292+1G>T	p.?	3		HCM	1041	2	1	rs771569935	1/245962=0	0/15304=0	0/33582=0	0/9850=0	0/17248=0	0/22300=0	1/111416=0	0/30782=0	0/5480=0				NA	NA	NA	NA	NA	33
1077	CM	MYH6	NM_002471.3	c.2411A>G	p.(Lys804Arg)	3		HCM	431	2	2											3	2	2	tolerated	0.21		benign	0.002	26
1078	CM	MYH6	NM_002471.3	c.2540C>T	p.(Thr847Met)	3		UCM	1042	1	1	rs759408374	9/246252=0	0/15304=0	0/33582=0	0/9850=0	0/17248=0	0/22300=0	9/111700=0	0/30782=0	0/5486=0	-1	-1	-1	tolerated	0.11	possibly_damaging	0.556	81	23.9
1079	CM	MYH6	NM_002471.3	c.2540C>T	p.(Thr847Met)	3		HCM	1570	2	1	rs759408374	9/246252=0	0/15304=0	0/33582=0	0/9850=0	0/17248=0	0/22300=0	9/111700=0	0/30782=0	0/5486=0	-1	-1	-1	tolerated	0.11	possibly_damaging	0.556	81	23.9
1080	CM	MYH6	NM_002471.3	c.254A>C	p.(Asp85Ala)	3		HCM	1546	3	2											-2	-2	-2	deleterious	0.01	possibly_damaging	0.851	126	26.3
1081	CM	MYH6	NM_002471.3	c.2575G>T	p.(Gly859Trp)	3		DCM	665	1	1	rs369274077	12/246262=0	0/15304=0	0/33582=0	0/9850=0	0/17248=0	0/22300=0	12/111710=0	0/30782=0	0/5486=0	-2	-2	-4	deleterious	0.01		benign	0.316	184
1082	CM	MYH6	NM_002471.3	c.2575G>T	p.(Gly859Trp)	3		DCM	1043	1	1	rs369274077	12/246262=0	0/15304=0	0/33582=0	0/9850=0	0/17248=0	0/22300=0	12/111710=0	0/30782=0	0/5486=0	-2	-2	-4	deleterious	0.01	benign	0.316	184	24.1
1083	CM	MYH6	NM_002471.3	c.2575G>T	p.(Val964Leu)	3		ARVC	1077	2	2	rs369274077	12/246262=0	0/15304=0	0/33582=0	0/9850=0	0/17248=0	0/22300=0	12/111710=0	0/30782=0	0/5486=0	-2	-2	-4	deleterious	0.01	benign	0.316	184	24.1
1084	CM	MYH6	NM_002471.3	c.2575G>T	p.(Gly859Trp)	3		HCM	1571	1	1	rs369274077	12/246262=0	0/15304=0	0/33582=0	0/9850=0	0/17248=0	0/22300=0	12/111710=0	0/30782=0	0/5486=0	-2	-2	-4	deleterious	0.01	benign	0.316	184	24.1
1085	CM	MYH6	NM_002471.3	c.2579G>T	p.(Arg860Leu)	3		Myopathy	1485	2	2	rs115845031	2/246256=0	0/15304=0	0/33582=0	0/9848=0	0/17248=0	0/22298=0	1/111708=0	0/30782=0	1/5486=0	-2	-2	-3	deleterious	0.01	benign	0.006	102	23.8
1086	CM	MYH6	NM_002471.3	c.2717G>A	p.(Arg906His)	3		UCM	444	2	2	rs527636904	17/246268=0	1/15304=0	1/33582=0	0/9850=0	0/17248=0	0/22296=0	10/111720=0	3/30782=0	2/5486=0	0	0	0	deleterious	0		probably damaging	0.932	29
1087	CM	MYH6	NM_002471.3	c.2717G>A	p.(Arg906His)	3		DCM	926	2	2	rs527636904	17/246268=0	1/15304=0	1/33582=0	0/9850=0	0/17248=0	0/22296=0	10/111720=0	3/30782=0	2/5486=0	0	0	0	deleterious	0	probably_damaging	0.932	29	31
1088	CM	MYH6	NM_002471.3	c.2789A>G	p.(Asp930Gly)	3		HCM	1044	1	1											-1	-1	-2	deleterious	0	possibly_damaging	0.648	94	26.5
1089	CM	MYH6	NM_002471.3	c.2951T>C	p.(Met984Thr)	3		NCCM	502	2	2	rs202028680	4/277186=0	4/24034=0	0/34418=0	0/10152=0	0/18864=0	0/25794=0	0/126674=0	0/30782=0	0/6468=0	-1	-1	-1	deleterious	0.01		probably damaging	0.979	81
1090	CM	MYH6	NM_002471.3	c.3346C>A	p.(Arg1116Ser)	3		DCM	666	1	1	rs372446459	18/275058=0	0/23672=0	0/34378=0	0/10100=0	0/18828=0	0/25308=0	17/125620=0	1/30738=0	0/6414=0	-1	-1	-1	deleterious	0		probably damaging	1	110
1091	CM	MYH6	NM_002471.3	c.3346C>A	p.(Arg1116Ser)	3		ARVC	829	3	3	rs372446459	18/275058=0	0/23672=0	0/34378=0	0/10100=0	0/18828=0	0/25308=0	17/125620=0	1/30738=0	0/6414=0	-1	-1	-1	deleterious	0.04	probably_damaging	1	110	24.7
1092	CM	MYH6	NM_002471.3	c.3346C>T	p.(Arg1116Cys)	3		DCM	736	2	2	rs372446459	8/244118=0	0/14946=0	0/33540=0	0/9798=0	0/17206=0	0/21818=0	7/110636=0	1/30738=0	0/5436=0	-3	-3	-4	deleterious	0	probably_damaging	1	180	26.3
1093	CM	MYH6	NM_002471.3	c.3346C>T	p.(Arg1116Cys)	3		HCM	1272	2	2	rs372446459	8/244118=0	0/14946=0	0/33540=0	0/9798=0	0/17206=0	0/21818=0	7/110636=0	1/30738=0	0/5436=0	-3	-3	-4	deleterious	0	probably_damaging	1	180	26.3
1094	CM	MYH6	NM_002471.3	c.3466G>A	p.(Gly1156Ser)	3		HCM	1022	4	4		9/235024=0	0/13722=0	0/33278=0	0/9606=0	7/16964=0	0/20450=0	0/105104=0	1/30624=0	1/5276=0	0	0	-1	deleterious	0.05	probably_damaging	1	56	26.7
1095	CM	MYH6	NM_002471.3	c.3468C>T	p.(Gly1156Gly)	3		NCCM	426	3	1	rs545420992	10/234306=0	0/13654=0	0/33230=0	0/9588=0	0/16938=0	0/20324=0	4/104726=0	6/30598=0	0/5248=0	NA	NA	NA	NA	NA		NA	NA	NA
1096	CM	MYH6	NM_002471.3	c.3468C>T	p.(Gly1156Gly)	3		HCM	1006	3	3	rs545420992	10/234306=0	0/13654=0	0/33230=0	0/9588=0	0/16938=0	0/20324=0	4/104726=0	6/30598=0	0/5248=0				NA	NA	NA	NA	NA	13.92
1097	CM	MYH6	NM_002471.3	c.3607G>T	p.(Ala1203Ser)	3		HCM	1585	1	1	rs753047012										1	1	1	tolerated	0.06	benign	0.277	99	21.6
1098	CM	MYH6	NM_002471.3	c.3612G>C	p.(Glu1204Asp)	3		HCM	464	2	2	rs751153777	25/274350=0	3/23802=0	3/34340=0	0/10104=0	0/18782=0	0/25698=0	19/124442=0	0/30770=0	0/6412=0	2	2	1	tolerated	0.1		benign	0.032	0
1099	CM	MYH6	NM_002471.3	c.3619G>A	p.(Glu1207Lys)	3		DCM	939	2	2	rs397516762	21/275298=0	0/23864=0	1/34382=0	0/10118=0	0/18822=0	2/25724=0	18/125176=0	0/30774=0	0/6438=0	1	1	1	deleterious	0.01	probably_damaging	0.999	56	27.8
1100	CM	MYH6	NM_002471.3	c.3808C>T	p.(Arg1270Cys)	3		UCM	417	4	4	rs371849826	18/277228=0	3/24036=0	3/34420=0	0/10152=0	0/18870=0	0/25794=0	12/126706=0	0/30782=0	0/6468=0	-3	-3	-4	deleterious	0		probably damaging	1	180
1101	CM	MYH6	NM_002471.3	c.3867G>T	p.(Leu1289Phe)	3		DCM	1045	3	1	rs138127105	32/277248=0	4/24034=0	0/34420=0	0/10152=0	12/18870=0.001	0/25794=0	0/126730=0	12/30782=0	4/6466=0.001	1	0	0	tolerated	0.32	benign	0.075	22	9221
1102	CM	MYH6	NM_002471.3	c.3934C>G	p.(Gln1312Glu)	3		DCM	1583	2	2		1/30960=0	0/8734=0	0/838=0	0/302=0	0/1622=0	0/3492=0	1/14990=0	0/0=0	0/982=0	2	2	2	deleterious	0.03	probably_damaging	0.949	29	25.3
1103	CM	MYH6	NM_002471.3	c.4026C>A	p.(Cys1342*)	3		DCM	1046	7	1	rs141062252	23/276122=0	0/24000=0	3/34408=0	14/10118=0.001	0/18858=0	0/25596=0	5/125916=0	0/30774=0	1/6452=0	-5	-4	-6	NA	NA	NA	NA	NA	37
1104	CM	MYH6	NM_002471.3	c.4136C>T	p.(Thr1379Met)	3		DCM	667	1	1	rs145611185	155/277218=0.001	3/24038=0	9/34420=0	2/10152=0	0/18866=0	2/25794=0	137/126700=0.001	0/30782=0	2/6466=0	-1	-1	-1	tolerated	0.06		probably damaging	0.992	81
1105	CM	MYH6	NM_002471.3	c.4136C>T	p.(Thr1379Met)	3		ARVC	668	1	1	rs145611185	155/277218=0.001	3/24038=0	9/34420=0	2/10152=0	0/18866=0	2/25794=0	137/126700=0.001	0/30782=0	2/6466=0	-1	-1	-1	tolerated	0.06		probably damaging	0.992	81
1106	CM	MYH6	NM_002471.3	c.4193G>A	p.(Arg1398Gln)	3		HCM	1047	1	1	rs150815925	102/277070=0	0/24028=0	5/34418=0	0/10150=0	0/18868=0	2/25702=0	72/126656=0.001	21/30782=0.001	2/6466=0	1	1	1	deleterious	0.02	benign	0.076	43	23.7
1107	CM	MYH6	NM_002471.3	c.4193G>A	p.(Arg1398Gln)	3		DCM	1592	2	1	rs150815925	102/277070=0	0/24028=0	5/34418=0	0/10150=0	0/18868=0	2/25702=0	72/126656=0.001	21/30782=0.001	2/6466=0	1	1	1	deleterious	0.02	benign	0.076	43	23.7
1108	CM	MYH6	NM_002471.3	c.4264C>T	p.(Arg1422Trp)	3		HCM	669	1	1	rs200465713	31/277210=0	4/24034=0	2/34420=0	0/10152=0	0/18870=0	1/25790=0	14/126694=0	10/30782=0	0/6468=0	-2	-3	-4	deleterious	0		probably damaging	1	101
1109	CM	MYH6	NM_002471.3	c.4306C>T	p.(Arg1436Cys)	3		HCM	1048	2	1	rs746893658	7/246220=0	0/15304=0	1/33582=0	1/9850=0	0/17248=0	0/22292=0	4/111678=0	1/30782=0	0/5484=0	-3	-3	-4	deleterious	0	probably_damaging	0.982	180	29.1
1110	CM	MYH6	NM_002471.3	c.4328C>A	p.(Ala1443Asp)	3		HCM	826	3	2	rs727503234	24/277146=0	0/24024=0	0/34420=0	0/10152=0	0/18870=0	0/25790=0	23/126646=0	0/30782=0	1/6462=0	-2	-2	-2	deleterious	0.01	possibly_damaging	0.772	126	26.7
1111	CM	MYH6	NM_002471.3	c.4360-6G>A	p.?	3		ARVC	1049	4	1	rs780182033	4/242408=0	0/15078=0	0/33492=0	0/9726=0	0/17206=0	0/22154=0	3/108616=0	1/30724=0	0/5412=0				NA	NA	NA	NA	NA	9468
1112	CM	MYH6	NM_002471.3	c.4379A>C	p.(Gln1460Pro)	3		UCM	1050	1	1											-1	-1	-2	deleterious	0.01	benign	0.06	76	24.1
1113	CM	MYH6	NM_002471.3	c.4429C>T	p.(Arg1477Cys)	3		HCM	1595	1	1	rs201989347	8/245990=0	0/15296=0	0/33574=0	0/9842=0	0/17248=0	1/22300=0	7/111468=0	0/30780=0	0/5482=0	-3	-3	-4	deleterious	0.01	probably_damaging	1	180	27.9
1114	CM	MYH6	NM_002471.3	c.4430G>A	p.(Arg1477His)	3		DCM	924	3	2	rs147586142	4/276874=0	2/24002=0	0/34408=0	0/10144=0	1/18870=0	0/25794=0	0/126418=0	1/30780=0	0/6458=0	0	0	0	deleterious	0.01	probably_damaging	1	29	29.7
1115	CM	MYH6	NM_002471.3	c.4438A>G	p.(Ser1480Gly)	3		DCM	1051	1	1		4/246116=0	0/15300=0	1/33574=0	0/9844=0	0/17246=0	0/22300=0	3/111590=0	0/30780=0	0/5482=0	0	0	-1	tolerated	0.08	benign	0.075	56	22.3
1116	CM	MYH6	NM_002471.3	c.4772A>G	p.(Asn1591Ser)	3		HCM	1584	4	2	rs200751434	13/277186=0	6/24020=0	1/34420=0	0/10152=0	0/18866=0	0/25792=0	5/126692=0	0/30782=0	1/6462=0	1	1	0	tolerated	0.05	probably_damaging	0.916	46	23.5
1117	CM	MYH6	NM_002471.3	c.4829G>A	p.(Arg1610His)	3		HCM	1052	2	1	rs758792342	12/277178=0	2/24014=0	0/34420=0	0/10152=0	0/18866=0	0/25790=0	7/126686=0	3/30782=0	0/6468=0	0	0	0	deleterious	0.01	benign	0.243	29	25.3
1118	CM	MYH6	NM_002471.3	c.4918G>A	p.(Glu1640Lys)	3		UCM	1053	1	1	rs748924413	4/277052=0	3/24022=0	0/34418=0	0/10152=0	0/18870=0	0/25786=0	1/126560=0	0/30782=0	0/6462=0	1	1	1	deleterious	0.04	possibly_damaging	0.746	56	26.3
1119	CM	MYH6	NM_002471.3	c.4955T>C	p.(Leu1652Pro)	3		HCM	505	2	1											-3	-3	-3	deleterious	0.02		probably damaging	0.962	98
1120	CM	MYH6	NM_002471.3	c.5026G>A	p.(Val1676Met)	3		HCM	1149	5	3	rs773755388	6/277192=0	3/24038=0	0/34420=0	0/10150=0	1/18870=0	0/25794=0	2/126670=0	0/30782=0	0/6468=0	1	1	1	deleterious	0.05	probably_damaging	0.91	21	26.8
1121	CM	MYH6	NM_002471.3	c.5102G>A	p.(Arg1701Gln)	3		HCM	1054	2	1	rs762103586	7/276780=0	2/24034=0	1/34418=0	0/10140=0	1/18866=0	0/25790=0	3/126288=0	0/30780=0	0/6464=0	1	1	1	deleterious	0	probably_damaging	0.999	43	33
1122	CM	MYH6	NM_002471.3	c.5293G>A	p.(Ala1765Thr)	3		UCM	888	3	3	rs397516775	28/277212=0	0/24036=0	1/34418=0	0/10152=0	0/18870=0	0/25788=0	26/126700=0	1/30782=0	0/6466=0	0	0	0	deleterious	0.05	possibly_damaging	0.705	58	28.5
1123	CM	MYH6	NM_002471.3	c.5481G>T	p.(Glu1827Asp)	3		DCM	1055	2	1	rs760865481										2	2	1	deleterious	0.01	probably_damaging	0.998	0	25.5
1124	CM	MYH6	NM_002471.3	c.5491G>A	p.(Glu1831Lys)	3		NCCM	1556	3	3	rs367834703	35/276968=0	0/24032=0	0/34414=0	0/10152=0	6/18864=0	0/25582=0	29/126680=0	0/30782=0	0/6462=0	1	1	1	deleterious	0.01	probably_damaging	0.999	56	31
1125	CM	MYH6	NM_002471.3	c.5519A>G	p.(Lys1840Arg)	3		UCM	1056	1	1	rs373629059	18/276616=0	1/24030=0	4/34414=0	0/10150=0	0/18860=0	0/25250=0	12/126672=0	0/30782=0	1/6458=0	3	2	2	tolerated	0.13	probably_damaging	0.999	26	24.9
1126	CM	MYH6	NM_002471.3	c.5694C>G	p.(Phe1898Leu)	3		DCM	670	1	1	rs201199853	6/246272=0	0/15304=0	0/33582=0	0/9850=0	0/17248=0	0/22300=0	6/111720=0	0/30782=0	0/5486=0	1	0	0	tolerated	0.09		benign	0.009	22
1127	CM	MYH6	NM_002471.3	c.731G>A	p.(Arg244His)	3		HCM	1057	2	1	rs200645920	3/246266=0	0/15304=0	0/33582=0	0/9850=0	1/17248=0	0/22300=0	1/111714=0	1/30782=0	0/5486=0	0	0	0	deleterious	0.01	probably_damaging	0.992	29	28.0
1128	CM	MYH6	NM_002471.3	c.779C>T	p.(Ala260Val)	3		Other indication	506	2	1		0/243794=0	0/15010=0	0/33432=0	0/9808=0	0/17148=0	0/21966=0	0/110536=0	0/30446=0	0/5448=0	0	0	0	deleterious	0		benign	0.033	64
1129	CM	MYH7	NM_000257.2	c.1633G>A	p.(Asp545Asn)	5 (when mono-allelic)		NCCM	1066	2	1	rs564101364	2/246230=0	0/15304=0	0/33582=0	0/9848=0	0/17248=0	0/22296=0	2/111686=0	0/30782=0	0/5484=0	2	1	1	deleterious	0	possibly_damaging	0.701	23	26.4
1130	CM	MYH7	NM_000257.2	c.2863G>A	p.(Asp955Asn)	5 (when mono-allelic)		NCCM	1066	2	2	rs886039204										2	1	1	deleterious	0	probably_damaging	0.999	23	32
1131	CM	MYH7	NM_000257.2	c.1208G>A	p.(Arg403Gln)	5		HCM	547	1	1	rs121913624										1	1	1	deleterious	0		probably damaging	0.999	102
1132	CM	MYH7	NM_000257.2	c.1208G>T	p.(Arg403Leu)	5		UCM	444	2	1	rs121913624										-2	-2	-3	deleterious	0		probably damaging	0.999	102
1133	CM	MYH7	NM_000257.2	c.1208G>T	p.(Arg403Leu)	5		HCM	1061	2	1	rs121913624										-2	-2	-3	deleterious	0	probably_damaging	0.999	102	25.9
1134	CM	MYH7	NM_000257.2	c.1976T>C	p.(Met659Thr)	5		DCM	548	1	1											-1	-1	-1	deleterious	0		probably damaging	1	81
1135	CM	MYH7	NM_000257.2	c.1987C>T	p.(Arg663Cys)	5		HCM	549	1	1	rs397516127										-3	-3	-4	deleterious	0.02		probably damaging	0.939	180
1136	CM	MYH7	NM_000257.2	c.1987C>T	p.(Arg663Cys)	5		HCM	550	1	1	rs397516127										-3	-3	-4	deleterious	0.02		probably damaging	0.939	180
1137	CM	MYH7	NM_000257.2	c.1987C>T	p.(Arg663Cys)	5		HCM	1070	1	1	rs397516127										-3	-3	-4	deleterious	0	probably_damaging	0.922	180	31
1138	CM	MYH7	NM_000257.2	c.2156G>A	p.(Arg719Gln)	5		HCM	551	1	1	rs121913641										1	1	1	deleterious	0		benign	0.294	43
1139	CM	MYH7	NM_000257.2	c.2609G>A	p.(Arg870His)	5		HCM	445	2	1	rs36211715	2/277154=0	0/24012=0	0/34418=0	0/10152=0	0/18870=0	0/25784=0	2/126674=0	0/30782=0	0/6462=0	0	0	0	deleterious	0		possibly damaging	0.861	29
1140	CM	MYH7	NM_000257.3	c.2609G>A	p.(Arg870His)	5		HCM	1075	3	1	rs36211715	2/277154=0	0/24012=0	0/34418=0	0/10152=0	0/18870=0	0/25784=0	2/126674=0	0/30782=0	0/6462=0	0	0	0	deleterious	0	possibly_damaging	0.861	29	28.3
1141	CM	MYH7	NM_000257.2	c.3100-2A>C	p.?	5		NCCM	552	1	1	rs759013925	5/277180=0	0/24026=0	0/34420=0	0/10150=0	0/18870=0	0/25786=0	5/126678=0	0/30782=0	0/6468=0	NA	NA	NA	NA	NA		NA	NA	NA
1142	CM	MYH7	NM_000257.2	c.3100-2A>C	p.?	5		DCM	1578	1	1	rs759013925	5/277180=0	0/24026=0	0/34420=0	0/10150=0	0/18870=0	0/25786=0	5/126678=0	0/30782=0	0/6468=0				NA	NA	NA	NA	NA	33
1143	CM	MYH7	NM_000257.2	c.3346G>A	p.(Glu1116Lys)	5		HCM	1086	4	1	rs727504274										1	1	1	deleterious	0.01	probably_damaging	0.999	56	29.2
1144	CM	MYH7	NM_000257.2	c.5754C>G	p.(Asn1918Lys)	5		DCM	553	1	1	rs138110910										0	0	0	deleterious	0.01		probably damaging	0.948	94
1145	CM	MYH7	NM_000257.2	c.5754C>G	p.(Asn1918Lys)	5		NCCM	1105	1	1	rs138110910										0	0	0	deleterious	0	probably_damaging	0.948	94	29.1
1146	CM	MYH7	NM_000257.2	c.5754C>G	p.(Asn1918Lys)	5		NCCM	1106	1	1	rs138110910										0	0	0	deleterious	0	probably_damaging	0.948	94	29.1
1147	CM	MYH7	NM_000257.2	c.5773C>G	p.(Arg1925Gly)	5		DCM	1107	4	1	rs755706526										-2	-2	-3	deleterious	0	probably_damaging	1	125	33
1148	CM	MYH7	NM_000257.2	c.732+1G>A	p.?	5		UCM	546	1	1	rs730880850	1/246262=0	0/15304=0	0/33582=0	0/9850=0	1/17248=0	0/22300=0	0/111710=0	0/30782=0	0/5486=0	NA	NA	NA	NA	NA		NA	NA	NA
1149	CM	MYH7	NM_000257.2	c.1063G>A	p.(Ala355Thr)	4		HCM	1059	2	1	rs397516088										0	0	0	deleterious	0	possibly_damaging	0.828	58	24.0
1150	CM	MYH7	NM_000257.2	c.1231G>A	p.(Val411Ile)	4		HCM	591	1	1	rs730880868	6/277216=0	1/24034=0	2/34420=0	0/10152=0	1/18868=0	1/25794=0	1/126702=0	0/30782=0	0/6464=0	3	3	3	deleterious	0.03		probably damaging	0.989	29
1151	CM	MYH7	NM_000257.2	c.1314G>C	p.(Trp438Cys)	4		DCM	592	1	1											-5	-2	-3	deleterious	0		probably damaging	1	215
1152	CM	MYH7	NM_000257.2	c.1532T>C	p.(Ile511Thr)	4		UCM	1065	2	1	rs397516110										-1	-1	-1	deleterious	0.02	benign	0.063	89	23.5
1153	CM	MYH7	NM_000257.2	c.1727A>G	p.(His576Arg)	4		HCM	458	2	1	rs727504238	5/277200=0	1/24014=0	0/34420=0	0/10152=0	0/18866=0	0/25794=0	4/126704=0	0/30782=0	0/6468=0	0	0	0	deleterious	0		probably damaging	1	29
1154	CM	MYH7	NM_000257.2	c.1727A>G	p.(His576Arg)	4		HCM	593	1	1	rs727504238	5/277200=0	1/24014=0	0/34420=0	0/10152=0	0/18866=0	0/25794=0	4/126704=0	0/30782=0	0/6468=0	0	0	0	deleterious	0		probably damaging	1	29
1155	CM	MYH7	NM_000257.2	c.1823T>C	p.(Leu608Ser)	4		UCM	594	1	1											-3	-2	-3	deleterious	0		probably damaging	0.982	145
1156	CM	MYH7	NM_000257.3	c.1987C>A	p.(Arg663Ser)	4		HCM	1069	3	1	rs397516127										-1	-1	-1	deleterious	0.01	possibly_damaging	0.61	110	25.9
1157	CM	MYH7	NM_000257.2	c.2002C>A	p.(His668Asn)	4		HCM	595	1	1											1	1	0	deleterious	0.01		probably damaging	0.999	68
1158	CM	MYH7	NM_000257.2	c.2333A>T	p.(Asp778Val)	4		UCM	459	2	1	rs121913634										-3	-3	-4	deleterious	0		probably damaging	0.955	152
1159	CM	MYH7	NM_000257.2	c.2360G>A	p.(Arg787His)	4	3 (frequency in control databases)	HCM	596	1	1	rs376754645	50/277210=0	1/24034=0	1/34420=0	1/10152=0	3/18870=0	0/25790=0	4/126696=0	39/30782=0.001	1/6466=0	0	0	0	tolerated	0.55		benign	0.336	29
1160	CM	MYH7	NM_000257.3	c.2605C>T	p.(Arg869Cys)	4		HCM	1074	2	1	rs730880750										-3	-3	-4	deleterious	0	probably_damaging	0.999	180	29.9
1161	CM	MYH7	NM_000257.2	c.2704G>A	p.(Glu902Lys)	4		DCM	440	2	2	rs869130333										1	1	1	deleterious	0		possibly damaging	0.624	56
1162	CM	MYH7	NM_000257.2	c.2918A>G	p.(Asn973Ser)	4		HCM	419	3	1											1	1	0	deleterious	0.02		probably damaging	0.995	46
1163	CM	MYH7	NM_000257.2	c.3169G>A	p.(Gly1057Ser)	4		UCM	459	2	2	rs397516179	2/246264=0	0/15304=0	0/33582=0	0/9850=0	0/17248=0	0/22298=0	2/111714=0	0/30782=0	0/5486=0	0	0	-1	deleterious	0.04		probably damaging	0.999	56
1164	CM	MYH7	NM_000257.2	c.3169G>A	p.(Gly1057Ser)	4		HCM	460	2	1	rs397516179	2/246264=0	0/15304=0	0/33582=0	0/9850=0	0/17248=0	0/22298=0	2/111714=0	0/30782=0	0/5486=0	0	0	-1	deleterious	0.04		probably damaging	0.999	56
1165	CM	MYH7	NM_000257.2	c.3169G>A	p.(Gly1057Ser)	4		HCM	1543	2	2	rs397516179	2/246264=0	0/15304=0	0/33582=0	0/9850=0	0/17248=0	0/22298=0	2/111714=0	0/30782=0	0/5486=0	0	0	-1	deleterious	0.04	probably_damaging	0.999	56	28.4
1166	CM	MYH7	NM_000257.2	c.3983C>A	p.(Ala1328Asp)	4		UCM	461	2	1											-2	-2	-2	tolerated	0.07		probably damaging	0.974	126
1167	CM	MYH7	NM_000257.2	c.3983C>A	p.(Ala1328Asp)	4		DCM	597	1	1											-2	-2	-2	tolerated	0.07		probably damaging	0.974	126
1168	CM	MYH7	NM_000257.2	c.4084T>C	p.(Ser1362Pro)	4		NCCM	598	1	1	rs112771600										-1	-1	-1	deleterious	0.03		probably damaging	0.958	74
1169	CM	MYH7	NM_000257.2	c.4125T>A	p.(Tyr1375*)	4		NCCM	599	1	1											NA	NA	NA	NA	NA		NA	NA	NA
1170	CM	MYH7	NM_000257.2	c.415G>T	p.(Val139Leu)	4		DCM	455	2	1											1	1	1	deleterious	0.05		probably damaging	0.995	32
1171	CM	MYH7	NM_000257.2	c.415G>T	p.(Val139Leu)	4		DCM	589	1	1											1	1	1	deleterious	0.05		probably damaging	0.995	32
1172	CM	MYH7	NM_000257.2	c.430G>A	p.(Gly144Ser)	4		HCM	456	2	1	rs1036184671										0	0	-1	deleterious	0		possibly damaging	0.873	56
1173	CM	MYH7	NM_000257.2	c.5135G>A	p.(Arg1712Gln)	4		HCM	1101	3	1	rs193922390	6/276748=0	0/24032=0	0/34416=0	0/10148=0	0/18866=0	0/25636=0	6/126404=0	0/30778=0	0/6468=0	1	1	1	deleterious	0.02	probably_damaging	0.999	43	33
1174	CM	MYH7	NM_000257.2	c.5326A>G	p.(Ser1776Gly)	4		HCM	462	2	1	rs369437262	12/277232=0	5/24032=0	2/34420=0	0/10152=0	5/18870=0	0/25794=0	0/126716=0	0/30782=0	0/6466=0	0	0	-1	deleterious	0.02		possibly damaging	0.842	56
1175	CM	MYH7	NM_000257.2	c.5326A>G	p.(Ser1776Gly)	4		HCM	463	2	1	rs369437262	12/277232=0	5/24032=0	2/34420=0	0/10152=0	5/18870=0	0/25794=0	0/126716=0	0/30782=0	0/6466=0	0	0	-1	deleterious	0.02		possibly damaging	0.842	56
1176	CM	MYH7	NM_000257.2	c.5326A>G	p.(Ser1776Gly)	4		HCM	1103	3	1	rs369437262	12/277232=0	5/24032=0	2/34420=0	0/10152=0	5/18870=0	0/25794=0	0/126716=0	0/30782=0	0/6466=0	0	0	-1	deleterious	0.02	possibly_damaging	0.842	56	27.2
1177	CM	MYH7	NM_000257.2	c.602T>C	p.(Ile201Thr)	4		DCM	590	1	1	rs397516258										-1	-1	-1	tolerated	0.76		benign	0.063	89
1178	CM	MYH7	NM_000257.2	c.689T>C	p.(Phe230Ser)	4		NCCM	457	2	1	rs886038844										-2	-2	-3	deleterious	0.01		probably damaging	0.997	155
1179	CM	MYH7	NM_000257.2	c.1118C>T	p.(Ala373Val)	3		DCM	673	1	1	rs730880924	1/30874=0	0/8710=0	0/836=0	0/302=0	0/1622=0	0/3480=0	1/14946=0	0/0=0	0/978=0	0	0	0	tolerated	0.05		possibly damaging	0.813	64
1180	CM	MYH7	NM_000257.2	c.1178C>T	p.(Ala393Val)	3		HCM	448	2	2	rs869025477										0	0	0	deleterious	0.02		possibly damaging	0.805	64
1181	CM	MYH7	NM_000257.3	c.1178C>T	p.(Ala393Val)	3		HCM	1060	1	1	rs869025477										0	0	0	deleterious	0	possibly_damaging	0.761	64	24.0
1182	CM	MYH7	NM_000257.2	c.121G>A	p.(Asp41Asn)	3		HCM	942	3	2		1/246238=0	0/15302=0	0/33582=0	0/9850=0	0/17248=0	0/22298=0	1/111690=0	0/30782=0	0/5486=0	2	1	1	deleterious	0.04		possibly damaging	0.7	23
1183	CM	MYH7	NM_000257.2	c.1311C>A	p.(Asn437Lys)	3		UCM	674	1	1											0	0	0	tolerated	1		benign	0.297	94
1184	CM	MYH7	NM_000257.2	c.1315A>T	p.(Met439Leu)	3		HCM	500	2	2	rs370310929	3/246268=0	0/15304=0	0/33582=0	0/9850=0	0/17248=0	0/22300=0	3/111716=0	0/30782=0	0/5486=0	2	2	2	tolerated	1		probably damaging	0.99	15
1185	CM	MYH7	NM_000257.2	c.1315A>T	p.(Met439Leu)	3		Other indication	675	1	1	rs370310929	3/246268=0	0/15304=0	0/33582=0	0/9850=0	0/17248=0	0/22300=0	3/111716=0	0/30782=0	0/5486=0	2	2	2	tolerated	1		probably damaging	0.99	15
1186	CM	MYH7	NM_000257.2	c.1315A>T	p.(Met439Leu)	3		HCM	1062	2	1	rs370310929	3/246268=0	0/15304=0	0/33582=0	0/9850=0	0/17248=0	0/22300=0	3/111716=0	0/30782=0	0/5486=0	2	2	2	tolerated	0.59	probably_damaging	0.976	15	23.1
1187	CM	MYH7	NM_000257.2	c.1319T>C	p.(Val440Ala)	3		HCM	1063	2	1		1/246270=0	0/15304=0	0/33582=0	0/9850=0	0/17248=0	0/22300=0	1/111718=0	0/30782=0	0/5486=0	0	0	0	deleterious	0.01	probably_damaging	0.999	64	25.4
1188	CM	MYH7	NM_000257.2	c.1357C>T	p.(Arg453Cys)	3		HCM	1064	3	1	rs121913625										-3	-3	-4	deleterious	0	probably_damaging	1	180	27.4
1189	CM	MYH7	NM_000257.2	c.1492C>G	p.(Gln498Glu)	3		HCM	676	1	1											2	2	2	deleterious	0		benign	0.268	29
1190	CM	MYH7	NM_000257.2	c.161G>A	p.(Arg54Gln)	3		Other indication	671	1	1	rs397516117	5/277156=0	0/24020=0	0/34420=0	1/10150=0	3/18868=0	0/25792=0	1/126656=0	0/30782=0	0/6468=0	1	1	1	tolerated	0.54		possibly damaging	0.55	43
1191	CM	MYH7	NM_000257.3	c.185A>G	p.(Glu62Gly)	3		DCM	1067	1	1											-2	-2	-3	deleterious	0	benign	0.2	98	23.6
1192	CM	MYH7	NM_000257.3	c.1915A>G	p.(Lys639Glu)	3		NCCM	1068	4	1											1	1	1	deleterious	0	possibly_damaging	0.678	56	26.8
1193	CM	MYH7	NM_000257.2	c.2104A>G	p.(Ile702Val)	3		HCM	1560	1	1	rs863225101										3	3	3	deleterious	0.01	benign	0.196	29	23.6
1194	CM	MYH7	NM_000257.3	c.2360G>A	p.(Arg787His)	3		HCM	1071	2	1	rs376754645	50/277210=0	1/24034=0	1/34420=0	1/10152=0	3/18870=0	0/25790=0	4/126696=0	39/30782=0.001	1/6466=0	0	0	0	tolerated	0.28	benign	0.336	29	22.1
1195	CM	MYH7	NM_000257.3	c.2360G>A	p.(Ala8382Asp)	3		HCM	1072	2	1	rs376754645	50/277210=0	1/24034=0	1/34420=0	1/10152=0	3/18870=0	0/25790=0	4/126696=0	39/30782=0.001	1/6466=0	0	0	0	tolerated	0.28	benign	0.336	29	22.1
1196	CM	MYH7	NM_000257.2	c.2400G>T	p.(Glu800Asp)	3		HCM	449	2	2	rs730880737	1/246262=0	0/15302=0	0/33582=0	0/9850=0	0/17248=0	0/22300=0	1/111712=0	0/30782=0	0/5486=0	2	2	1	tolerated	0.17		benign	0.38	0
1197	CM	MYH7	NM_000257.2	c.2417A>C	p.(Glu806Ala)	3		DCM	677	1	1		3/277196=0	0/24030=0	0/34418=0	0/10152=0	0/18866=0	0/25794=0	3/126688=0	0/30782=0	0/6466=0	-1	-1	-1	tolerated	0.06		benign	0.413	107
1198	CM	MYH7	NM_000257.2	c.2544G>C	p.(Glu848Asp)	3		HCM	1073	1	1	rs863225099										2	2	1	deleterious	0.01	probably_damaging	0.992	0	23.9
1199	CM	MYH7	NM_000257.2	c.2562G>T	p.(Glu854Asp)	3		HCM	1063	2	2	rs778148245										2	2	1	deleterious	0.04	benign	0.012	0	22.7
1200	CM	MYH7	NM_000257.2	c.2685A>C	p.(Gln895His)	3		HCM	1076	1	1											1	0	1	deleterious	0.01	possibly_damaging	0.88	24	26.1
1201	CM	MYH7	NM_000257.2	c.2890G>C	p.(Val964Leu)	3		DCM	678	1	1	rs45496496	118/277240=0	0/24034=0	2/34420=0	0/10152=0	0/18870=0	0/25786=0	104/126728=0.001	12/30782=0	0/6468=0	1	1	1	tolerated	0.14		probably damaging	0.992	32
1202	CM	MYH7	NM_000257.2	c.2890G>C	p.(Val964Leu)	3		ARVC	1077	2	1	rs45496496	118/277240=0	0/24034=0	2/34420=0	0/10152=0	0/18870=0	0/25786=0	104/126728=0.001	12/30782=0	0/6468=0	1	1	1	deleterious	0.04	probably_damaging	0.992	32	27.6
1203	CM	MYH7	NM_000257.3	c.2890G>C	p.(Val964Leu)	3		DCM	1078	2	1	rs45496496	118/277240=0	0/24034=0	2/34420=0	0/10152=0	0/18870=0	0/25786=0	104/126728=0.001	12/30782=0	0/6468=0	1	1	1	deleterious	0.04	probably_damaging	0.992	32	27.6
1204	CM	MYH7	NM_000257.3	c.2890G>C	p.(Val964Leu)	3		NCCM	1079	1	1	rs45496496	118/277240=0	0/24034=0	2/34420=0	0/10152=0	0/18870=0	0/25786=0	104/126728=0.001	12/30782=0	0/6468=0	1	1	1	deleterious	0.04	probably_damaging	0.992	32	27.6
1205	CM	MYH7	NM_000257.2	c.2890G>C	p.(Val964Leu)	3		HCM	1080	1	1	rs45496496	118/277240=0	0/24034=0	2/34420=0	0/10152=0	0/18870=0	0/25786=0	104/126728=0.001	12/30782=0	0/6468=0	1	1	1	deleterious	0.04	probably_damaging	0.992	32	27.6
1206	CM	MYH7	NM_000257.2	c.2890G>C	p.(Val964Leu)	3		DCM	1412	2	2	rs45496496	118/277240=0	0/24034=0	2/34420=0	0/10152=0	0/18870=0	0/25786=0	104/126728=0.001	12/30782=0	0/6468=0	1	1	1	deleterious	0.04	probably_damaging	0.992	32	27.6
1207	CM	MYH7	NM_000257.2	c.2890G>C	p.(Val964Leu)	3		DCM	1575	2	1	rs45496496	118/277240=0	0/24034=0	2/34420=0	0/10152=0	0/18870=0	0/25786=0	104/126728=0.001	12/30782=0	0/6468=0	1	1	1	deleterious	0.04	probably_damaging	0.992	32	27.6
1208	CM	MYH7	NM_000257.2	c.2908G>A	p.(Ala970Thr)	3		DCM	842	4	2		2/277194=0	0/24034=0	0/34420=0	0/10152=0	0/18868=0	0/25742=0	2/126728=0	0/30782=0	0/6468=0	0	0	0	tolerated	0.05	probably_damaging	0.999	58	26.4
1209	CM	MYH7	NM_000257.2	c.2908G>A	p.(Ala970Thr)	3		ARVC	1517	3	2		2/277194=0	0/24034=0	0/34420=0	0/10152=0	0/18868=0	0/25742=0	2/126728=0	0/30782=0	0/6468=0	0	0	0	tolerated	0.05	probably_damaging	0.999	58	26.4
1210	CM	MYH7	NM_000257.2	c.2916G>C	p.(Glu972Asp)	3		HCM	1081	4	1	rs141191984										2	2	1	tolerated	0.09	probably_damaging	0.992	0	23.8
1211	CM	MYH7	NM_000257.3	c.2990A>G	p.(Lys997Arg)	3		ARVC	1082	2	1											3	2	2	tolerated	0.09	benign	0.405	26	22.3
1212	CM	MYH7	NM_000257.2	c.2990A>G	p.(Lys997Arg)	3		HCM	1083	3	1											3	2	2	tolerated	0.09	benign	0.405	26	22.3
1213	CM	MYH7	NM_000257.2	c.3134G>A	p.(Arg1045His)	3		ARVC	1084	1	1	rs397516178	10/246244=0	0/15304=0	0/33582=0	0/9848=0	4/17248=0	0/22298=0	4/111696=0	1/30782=0	1/5486=0	0	0	0	deleterious	0	probably_damaging	0.999	29	32
1214	CM	MYH7	NM_000257.3	c.3274G>A	p.(Ala1092Thr)	3		HCM	972	4	3	rs772216320	3/246212=0	0/15304=0	1/33582=0	0/9848=0	0/17246=0	0/22294=0	2/111670=0	0/30782=0	0/5486=0	0	0	0	tolerated	0.12	benign	0.005	58	17.80
1215	CM	MYH7	NM_000257.2	c.329_331delinsCGG	p.(Gly110_Ser11delinsAlaAla)	3		ARVC	849	4	2											2	2	1	NA	NA	NA	NA	NA	9749
1216	CM	MYH7	NM_000257.2	c.3294G>T	p.(Gln1098His)	3		HCM	1058	4	1	rs375323916										1	0	1	deleterious	0.01	probably_damaging	0.999	24	24.2
1217	CM	MYH7	NM_000257.2	c.3294G>T	p.(Gln1098His)	3		HCM	1085	4	1	rs375323916										1	0	1	deleterious	0.01	probably_damaging	0.999	24	24.2
1218	CM	MYH7	NM_000257.2	c.3301G>A	p.(Gly1101Ser)	3		DCM	779	6	2	rs367546859	14/246208=0	0/15304=0	2/33582=0	0/9850=0	1/17248=0	0/22300=0	10/111660=0	1/30782=0	0/5482=0	0	0	-1	tolerated	0.84	benign	0.003	56	21.7
1219	CM	MYH7	NM_000257.2	c.3301G>A	p.(Gly1101Ser)	3		ARVC	1557	2	2	rs367546859	14/246208=0	0/15304=0	2/33582=0	0/9850=0	1/17248=0	0/22300=0	10/111660=0	1/30782=0	0/5482=0	0	0	-1	tolerated	0.84	benign	0.003	56	21.7
1220	CM	MYH7	NM_000257.2	c.3726+6C>T	p.?	3		UCM	1087	1	1	rs377745688	23/277000=0	0/24006=0	1/34420=0	0/10152=0	0/18866=0	0/25794=0	22/126518=0	0/30782=0	0/6462=0				NA	NA	NA	NA	NA	16.75
1221	CM	MYH7	NM_000257.3	c.3803G>A	p.(Arg1268His)	3		HCM	1088	3	1	rs397516194	18/246260=0	0/15304=0	0/33580=0	0/9850=0	15/17248=0.001	0/22296=0	0/111714=0	3/30782=0	0/5486=0	0	0	0	deleterious	0.01	probably_damaging	1	29	32
1222	CM	MYH7	NM_000257.2	c.3828G>C	p.(Gln1276His)	3		HCM	679	1	1											1	0	1	tolerated	0.08		benign	0.042	24
1223	CM	MYH7	NM_000257.2	c.4130C>T	p.(Thr1377Met)	3		HCM	1089	2	1	rs397516201	1/246254=0	0/15302=0	0/33582=0	0/9850=0	0/17248=0	0/22300=0	1/111706=0	0/30782=0	0/5484=0	-1	-1	-1	deleterious	0	probably_damaging	0.971	81	28.0
1224	CM	MYH7	NM_000257.2	c.4130C>T	p.(Thr1377Met)	3		HCM	1090	2	1	rs397516201	1/246254=0	0/15302=0	0/33582=0	0/9850=0	0/17248=0	0/22300=0	1/111706=0	0/30782=0	0/5484=0	-1	-1	-1	deleterious	0	probably_damaging	0.971	81	28.0
1225	CM	MYH7	NM_000257.3	c.4145G>A	p.(Arg1382Gln)	3		HCM	1091	2	1	rs727504325	1/246238=0	1/15304=0	0/33582=0	0/9850=0	0/17248=0	0/22300=0	0/111688=0	0/30782=0	0/5484=0	1	1	1	deleterious	0.01	probably_damaging	0.999	43	31
1226	CM	MYH7	NM_000257.2	c.4187G>C	p.(Arg1396Pro)	3		DCM	1092	2	1	rs370069461										-2	-2	-2	deleterious	0	probably_damaging	0.979	103	32
1227	CM	MYH7	NM_000257.2	c.4210G>A	p.(Val1404Met)	3		HCM	458	2	2	rs371552806	9/277180=0	0/24030=0	0/34420=0	0/10152=0	0/18868=0	0/25778=0	8/126686=0	1/30782=0	0/6464=0	1	1	1	tolerated	0.18		probably damaging	0.977	21
1228	CM	MYH7	NM_000257.2	c.4259G>A	p.(Arg1420Gln)	3		HCM	1093	2	1	rs397516207										1	1	1	tolerated	0.06	probably_damaging	0.999	43	27.2
1229	CM	MYH7	NM_000257.2	c.4374G>A	p.(Gln1458=)	3		DCM	1518	2	2														NA	NA	NA	NA	NA	20.3
1230	CM	MYH7	NM_000257.2	c.4377G>T	p.(Lys1459Asn)	3		HCM	1094	1	1	rs201307101	79/276972=0	3/24026=0	7/34416=0	1/10138=0	0/18864=0	0/25774=0	66/126506=0.001	0/30782=0	2/6466=0	0	0	0	deleterious	0	probably_damaging	0.999	94	24.0
1231	CM	MYH7	NM_000257.3	c.4423C>T	p.(Arg1475Cys)	3		NCCM	1068	4	2	rs139646545	12/277186=0	2/24024=0	1/34420=0	0/10152=0	0/18868=0	3/25794=0	6/126682=0	0/30782=0	0/6464=0	-3	-3	-4	deleterious	0.01	probably_damaging	1	180	31
1232	CM	MYH7	NM_000257.2	c.4693T>G	p.(Phe1565Val)	3		DCM	427	3	1											0	-1	-1	tolerated	0.26		benign	0.141	50
1233	CM	MYH7	NM_000257.2	c.4693T>G	p.(Phe1565Val)	3		UCM	874	4	2											0	-1	-1	deleterious	0.01	benign	0.141	50	23.8
1234	CM	MYH7	NM_000257.3	c.4717G>A	p.(Glu1573Lys)	3		HCM	1095	3	1	rs750987717	15/246132=0	0/15304=0	0/33580=0	0/9842=0	0/17248=0	3/22280=0	10/111622=0	2/30772=0	0/5484=0	1	1	1	deleterious	0.01	benign	0.311	56	25.7
1235	CM	MYH7	NM_000257.2	c.4747A>T	p.(Met1583Leu)	3		HCM	680	1	1		1/246252=0	0/15304=0	0/33582=0	0/9850=0	0/17248=0	0/22298=0	1/111704=0	0/30782=0	0/5484=0	2	2	2	tolerated	0.34		benign	0.006	15
1236	CM	MYH7	NM_000257.2	c.4816C>T	p.(Arg1606Cys)	3		HCM	1096	3	1	rs200530211	2/246268=0	0/15304=0	0/33582=0	0/9850=0	0/17248=0	0/22296=0	1/111720=0	1/30782=0	0/5486=0	-3	-3	-4	deleterious	0	probably_damaging	0.982	180	28.0
1237	CM	MYH7	NM_000257.2	c.4853T>C	p.(Met1618Thr)	3		DCM	1097	1	1		1/246268=0	0/15304=0	0/33582=0	0/9850=0	0/17248=0	0/22300=0	1/111716=0	0/30782=0	0/5486=0	-1	-1	-1	deleterious	0	benign	0.41	81	24.2
1238	CM	MYH7	NM_000257.2	c.49C>T	p.(Arg17Cys)	3		HCM	992	2	2	rs45511396	3/246118=0	0/15304=0	0/33582=0	0/9848=0	0/17246=0	0/22298=0	2/111576=0	1/30782=0	0/5482=0	-3	-3	-4	deleterious	0.01	probably_damaging	0.943	180	27.8
1239	CM	MYH7	NM_000257.2	c.5135G>A	p.(Arg1712Gln)	3		HCM	681	1	1	rs193922390	6/276748=0	0/24032=0	0/34416=0	0/10148=0	0/18866=0	0/25636=0	6/126404=0	0/30778=0	0/6468=0	1	1	1	tolerated	0.19		probably damaging	0.999	43
1240	CM	MYH7	NM_000257.2	c.5135G>A	p.(Arg1712Gln)	3		HCM	682	1	1	rs193922390	6/276748=0	0/24032=0	0/34416=0	0/10148=0	0/18866=0	0/25636=0	6/126404=0	0/30778=0	0/6468=0	1	1	1	tolerated	0.19		probably damaging	0.999	43
1241	CM	MYH7	NM_000257.2	c.5135G>A	p.(Arg1712Gln)	3		HCM	683	1	1	rs193922390	6/276748=0	0/24032=0	0/34416=0	0/10148=0	0/18866=0	0/25636=0	6/126404=0	0/30778=0	0/6468=0	1	1	1	tolerated	0.19		probably damaging	0.999	43
1242	CM	MYH7	NM_000257.3	c.5135G>A	p.(Arg1712Gln)	3		HCM	1098	2	1	rs193922390	6/276748=0	0/24032=0	0/34416=0	0/10148=0	0/18866=0	0/25636=0	6/126404=0	0/30778=0	0/6468=0	1	1	1	deleterious	0.02	probably_damaging	0.999	43	33
1243	CM	MYH7	NM_000257.3	c.5135G>A	p.(Arg1712Gln)	3		HCM	1099	2	1	rs193922390	6/276748=0	0/24032=0	0/34416=0	0/10148=0	0/18866=0	0/25636=0	6/126404=0	0/30778=0	0/6468=0	1	1	1	deleterious	0.02	probably_damaging	0.999	43	33
1244	CM	MYH7	NM_000257.2	c.5135G>A	p.(Arg1712Gln)	3		HCM	1100	1	1	rs193922390	6/276748=0	0/24032=0	0/34416=0	0/10148=0	0/18866=0	0/25636=0	6/126404=0	0/30778=0	0/6468=0	1	1	1	deleterious	0.02	probably_damaging	0.999	43	33
1245	CM	MYH7	NM_000257.2	c.5137G>A	p.(Val1713Met)	3		HCM	1102	1	1											1	1	1	deleterious	0.02	possibly_damaging	0.517	21	27.7
1246	CM	MYH7	NM_000257.2	c.5470_5471delinsGG	p.(Asn1824Gly)	3		ARVC	1610	1	1	rs760218400										#N/A	#N/A	#N/A	tolerated	0.9	benign	0	80	20.5
1247	CM	MYH7	NM_000257.2	c.5494C>T	p.(Arg1832Cys)	3		Other indication	506	2	2	rs201865159	9/245600=0	0/15302=0	1/33578=0	0/9850=0	0/17246=0	1/21678=0	7/111684=0	0/30782=0	0/5480=0	-3	-3	-4	deleterious	0		probably damaging	0.927	180
1248	CM	MYH7	NM_000257.2	c.5527A>G	p.(Ser1843Gly)	3		HCM	1104	3	1	rs200157204	3/244296=0	0/15298=0	0/33578=0	0/9848=0	0/17240=0	0/20486=0	3/111604=0	0/30782=0	0/5460=0	0	0	-1	tolerated	0.07	benign	0.262	56	23.1
1249	CM	MYH7	NM_000257.2	c.5534G>A	p.(Arg1845Gln)	3		UCM	684	1	1	rs730880822	1/243392=0	0/15294=0	1/33574=0	0/9848=0	0/17236=0	0/19694=0	0/111508=0	0/30782=0	0/5456=0	1	1	1	deleterious	0		probably damaging	0.999	43
1250	CM	MYH7	NM_000257.2	c.5588G>A	p.(Arg1863Gln)	3		DCM	858	3	2	rs45520836	3/276850=0	0/24024=0	1/34418=0	0/10150=0	0/18868=0	0/25470=0	2/126680=0	0/30782=0	0/6458=0	1	1	1	deleterious	0.01	probably_damaging	0.964	43	33
1251	CM	MYH7	NM_000257.2	c.5690G>A	p.(Arg1897His)	3		DCM	495	2	2	rs727503240	2/277216=0	0/24036=0	0/34420=0	0/10152=0	0/18870=0	0/25790=0	1/126698=0	1/30782=0	0/6468=0	0	0	0	deleterious	0		probably damaging	1	29
1252	CM	MYH7	NM_000257.2	c.598G>A	p.(Ala200Thr)	3		HCM	672	1	1											0	0	0	tolerated	0.09		possibly damaging	0.59	58
1253	CM	MYH7	NM_000257.3	c.599C>T	p.(Ala200Val)	3		HCM	1019	2	2											0	0	0	tolerated	0.31	possibly_damaging	0.641	64	23.1
1254	CM	MYH7	NM_000257.2	c.67C>T	p.(Arg23Trp)	3		NCCM	467	2	2	rs730880828	7/277142=0	1/24026=0	0/34420=0	0/10152=0	0/18870=0	2/25792=0	4/126632=0	0/30782=0	0/6468=0	-2	-3	-4	deleterious	0.04		probably damaging	0.916	101
1255	CM	MYH7	NM_000257.2	c.67C>T	p.(Arg23Trp)	3		DCM	717	1	1	rs730880828	7/277142=0	1/24026=0	0/34420=0	0/10152=0	0/18870=0	2/25792=0	4/126632=0	0/30782=0	0/6468=0	-2	-3	-4	deleterious	0.04		probably damaging	0.916	101
1256	CM	MYH7	NM_133378.4	c.77526C>A	p.(Asp25842Glu)	3		HCM	1108	2	1	rs762042364	1/245400=0	0/15278=0	0/33500=0	0/9840=0	0/17130=0	0/22270=0	1/111154=0	0/30774=0	0/5454=0	2	2	1	NA	NA	NA	NA	0	16.30
1257	CM	MYH7	NM_000257.2	c.77C>T	p.(Ala26Val)	3		UCM	1109	3	1	rs186964570	148/277138=0.001	1/24020=0	2/34420=0	6/10152=0.001	129/18870=0.007	0/25782=0	5/126644=0	4/30782=0	1/6468=0	0	0	0	tolerated	0.08	benign	0.011	64	19.87
1258	CM	MYH7	NM_000257.3	c.920C>G	p.(Pro307Arg)	3		HCM	1110	2	1	rs397516273										-2	-2	-2	deleterious	0	probably_damaging	1	103	25.2
1259	CM	MYH7	NM_000257.2	c.999T>A	p.(Asp333Glu)	3		DCM	1111	3	1											2	2	1	tolerated	0.07	possibly_damaging	0.478	0	22.4
1260	CM	MYL2	NM_000432.3	c.432del	p.(Asp145Thrfs*2)	5		HCM	1114	4	1														NA	NA	NA	NA	NA	23.1
1261	CM	MYL2	NM_000432.3	c.64G>A	p.(Glu22Lys)	5		HCM	446	2	1	rs104894368	5/246258=0	0/15300=0	2/33582=0	0/9848=0	0/17248=0	0/22300=0	2/111718=0	0/30776=0	1/5486=0	1	1	1	deleterious	0.01		possibly damaging	0.54	56
1262	CM	MYL2	NM_000432.3	c.64G>A	p.(Glu22Lys)	5		HCM	554	1	1	rs104894368	5/246258=0	0/15300=0	2/33582=0	0/9848=0	0/17248=0	0/22300=0	2/111718=0	0/30776=0	1/5486=0	1	1	1	deleterious	0.01		possibly damaging	0.54	56
1263	CM	MYL2	NM_000432.3	c.64G>A	p.(Glu22Lys)	5		HCM	1115	1	1	rs104894368	5/246258=0	0/15300=0	2/33582=0	0/9848=0	0/17248=0	0/22300=0	2/111718=0	0/30776=0	1/5486=0	1	1	1	deleterious	0	possibly_damaging	0.54	56	25.7
1264	CM	MYL2	NM_000432.3	c.64G>A	p.(Glu22Lys)	5		HCM	1116	1	1	rs104894368	5/246258=0	0/15300=0	2/33582=0	0/9848=0	0/17248=0	0/22300=0	2/111718=0	0/30776=0	1/5486=0	1	1	1	deleterious	0	possibly_damaging	0.54	56	25.7
1265	CM	MYL2	NM_000432.3	c.401A>C	p.(Glu134Ala)	3		HCM	1112	2	1	rs143139258	54/277164=0	4/24010=0	7/34416=0	0/10152=0	0/18866=0	0/25790=0	42/126684=0	0/30782=0	1/6464=0	-1	-1	-1	deleterious	0.01	possibly_damaging	0.541	107	34
1266	CM	MYL2	NM_000432.3	c.401A>C	p.(Glu134Ala)	3		HCM	1113	2	1	rs143139258	54/277164=0	4/24010=0	7/34416=0	0/10152=0	0/18866=0	0/25790=0	42/126684=0	0/30782=0	1/6464=0	-1	-1	-1	deleterious	0.01	possibly_damaging	0.541	107	34
1267	CM	MYL2	NM_000432.3	c.403-1G>C	p.?	3		UCM	685	1	1	rs199474813	11/243012=0	0/15286=0	0/33578=0	0/9836=0	2/17238=0	0/21752=0	9/109088=0	0/30778=0	0/5456=0	NA	NA	NA	NA	NA		NA	NA	NA
1268	CM	MYL3	NM_000258.2	c.187C>T	p.(Arg63Cys)	4		HCM	1552	2	1	rs565312070	4/246250=0	0/15300=0	1/33582=0	0/9850=0	0/17248=0	0/22300=0	2/111702=0	1/30782=0	0/5486=0	-3	-3	-4	deleterious	0	probably_damaging	0.974	180	26.4
1269	CM	MYL3	NM_000258.2	c.476C>T	p.(Thr159Met)	4		HCM	600	1	1	rs748832105	9/277034=0	2/24020=0	2/34418=0	0/10150=0	0/18870=0	0/25788=0	4/126542=0	1/30782=0	0/6464=0	-1	-1	-1	deleterious	0		probably damaging	0.972	81
1270	CM	MYL3	NM_000258.2	c.170C>A	p.(Ala57Asp)	3		HCM	1117	3	1	rs139794067	44/277138=0	0/23996=0	1/34420=0	4/10152=0	10/18868=0.001	0/25792=0	11/126662=0	17/30782=0.001	1/6466=0	-2	-2	-2	deleterious	0	probably_damaging	0.999	126	28.2
1271	CM	MYL3	NM_000258.2	c.220G>A	p.(Gly74Arg)	3		DCM	443	2	2	rs730880956	19/277158=0	0/24004=0	0/34420=0	0/10152=0	0/18870=0	0/25792=0	11/126672=0	8/30782=0	0/6466=0	-2	-2	-3	tolerated	0.06		benign	0.109	125
1272	CM	MYL3	NM_000258.2	c.427G>A	p.(Glu143Lys)	3		HCM	492	2	2	rs104893750	3/277236=0	0/24034=0	3/34420=0	0/10152=0	0/18870=0	0/25794=0	0/126716=0	0/30782=0	0/6468=0	1	1	1	deleterious	0		possibly damaging	0.645	56
1273	CM	MYL3	NM_000258.2	c.439A>G	p.(Thr147Ala)	3		HCM	1118	1	1	rs771429520	1/246260=0	0/15304=0	0/33580=0	0/9850=0	0/17248=0	0/22300=0	1/111712=0	0/30782=0	0/5484=0	0	0	0	deleterious	0.04	benign	0.106	58	23.5
1274	CM	MYL3	NM_000258.2	c.4G>C	p.(Ala2Pro)	3		HCM	428	4	1	rs148310342	13/276388=0	8/23996=0	3/34414=0	0/10140=0	0/18864=0	0/25228=0	1/126514=0	1/30780=0	0/6452=0	-1	-1	-1	tolerated	0.23		benign	0.006	27
1275	CM	MYL3	NM_000258.2	c.530A>G	p.(Glu177Gly)	3		HCM	1119	2	1	rs193922391	17/276896=0	1/24010=0	3/34418=0	4/10150=0	0/18866=0	0/25682=0	1/126526=0	5/30782=0	3/6462=0	-2	-2	-3	deleterious	0	possibly_damaging	0.849	98	27.6
1276	CM	MYOZ2	NM_133378.4	c.12680G>A	p.(Ser4227Asn)	3		NCCM	1120	2	1	rs749906091	1/243690=0	0/15234=0	0/33314=0	0/9726=0	0/17058=0	0/22204=0	0/110310=0	1/30432=0	0/5412=0	1	1	0	NA	NA	NA	NA	46	22.2
1277	CM	MYOZ2	NM_016599.4	c.148C>T	p.(Leu50Phe)	3		HCM	960	2	2		1/246126=0	0/15302=0	0/33578=0	0/9848=0	0/17244=0	0/22296=0	1/111602=0	0/30778=0	0/5478=0	1	0	0	tolerated	0.05	benign	0.089	22	21.9
1278	CM	MYOZ2	NM_016599.4	c.407_409del	p.(Pro136_Glu137delinsGln)	3		UCM	1121	3	1														NA	NA	NA	NA	NA	22.2
1279	CM	MYOZ2	NM_016599.4	c.479C>T	p.(Pro160Leu)	3		HCM	507	2	1	rs200791464	21/277092=0	2/24024=0	0/34394=0	0/10146=0	0/18870=0	0/25790=0	17/126626=0	1/30780=0	1/6462=0	-3	-3	-3	tolerated	0.25		possibly damaging	0.872	98
1280	CM	MYOZ2	NM_016599.4	c.479C>T	p.(Pro160Leu)	3		HCM	1034	2	2	rs200791464	21/277092=0	2/24024=0	0/34394=0	0/10146=0	0/18870=0	0/25790=0	17/126626=0	1/30780=0	1/6462=0	-3	-3	-3	tolerated	0.09	possibly_damaging	0.872	98	24.5
1281	CM	MYOZ2	NM_016599.4	c.688C>T	p.(Arg230Trp)	3		UCM	231	4	3	rs372215131	75/277050=0	0/24022=0	2/34418=0	9/10148=0.001	0/18866=0	5/25772=0	35/126580=0	23/30782=0.001	1/6462=0	-2	-3	-4	deleterious	0.02	probably_damaging	0.979	101	31
1282	CM	MYOZ2	NM_016599.4	c.688C>T	p.(Arg230Trp)	3		UCM	1383	4	3	rs372215131	75/277050=0	0/24022=0	2/34418=0	9/10148=0.001	0/18866=0	5/25772=0	35/126580=0	23/30782=0.001	1/6462=0	-2	-3	-4	deleterious	0.02	probably_damaging	0.979	101	31
1283	CM	MYOZ2	NM_016599.3	c.712G>A	p.(Gly238Arg)	3		UCM	424	3	2	rs796785947	1/246098=0	0/15304=0	0/33578=0	0/9848=0	0/17248=0	0/22282=0	1/111576=0	0/30782=0	0/5480=0	-2	-2	-3	deleterious	0		probably damaging	1	125
1284	CM	MYOZ2	NM_016599.3	c.712G>A	p.(Gly238Arg)	3		NCCM	1299	2	2	rs796785947	1/246098=0	0/15304=0	0/33578=0	0/9848=0	0/17248=0	0/22282=0	1/111576=0	0/30782=0	0/5480=0	-2	-2	-3	deleterious	0	probably_damaging	1	125	31
1285	CM	MYPN	NM_032578.2	c.59A>G	p.(Tyr20Cys)	4	3 (frequency in control databases)	HCM	464	2	1	rs140148105	256/277138=0.001	10/24036=0	44/34414=0.001	0/10146=0	0/18866=0	0/25788=0	194/126652=0.002	0/30776=0	8/6460=0.001	-3	-2	-3	deleterious	0		probably damaging	0.998	194
1286	CM	MYPN	NM_032578.3	c.59A>G	p.(Tyr20Cys)	4	3 (frequency in control databases)	ARVC	601	1	1	rs140148105	256/277138=0.001	10/24036=0	44/34414=0.001	0/10146=0	0/18866=0	0/25788=0	194/126652=0.002	0/30776=0	8/6460=0.001	-3	-2	-3	deleterious	0		probably damaging	0.998	194
1287	CM	MYPN	NM_032578.3	c.1012C>T	p.(Arg338Cys)	3		HCM	1149	5	2	rs140037748	16/276828=0	7/24038=0	2/34414=0	0/10138=0	1/18854=0	1/25772=0	4/126370=0	1/30782=0	0/6460=0	-3	-3	-4	deleterious	0	probably_damaging	0.999	180	33
1288	CM	MYPN	NM_032578.3	c.103G>T	p.(Ala35Ser)	3		HCM	1122	2	1		1/246054=0	1/15286=0	0/33576=0	0/9842=0	0/17238=0	0/22300=0	0/111552=0	0/30778=0	0/5482=0	1	1	1	tolerated	1	benign	0.033	99	17.95
1289	CM	MYPN	NM_032578.3	c.1081G>T	p.(Val361Phe)	3		HCM	686	1	1	rs527628617	4/245824=0	0/15284=0	0/33574=0	0/9838=0	1/17228=0	0/22246=0	2/111392=0	1/30782=0	0/5480=0	0	-1	-1	deleterious	0.02		benign	0.091	50
1290	CM	MYPN	NM_032578.3	c.1466G>A	p.(Arg489Gln)	3		DCM	1123	1	1	rs141031460	25/245540=0	0/15278=0	5/33512=0	0/9836=0	0/17194=0	0/22292=0	14/111420=0	6/30534=0	0/5474=0	1	1	1	deleterious	0	possibly_damaging	0.834	43	33
1291	CM	MYPN	NM_032578.3	c.2137C>A	p.(Pro713Thr)	3		DCM	1124	1	1	rs762572651										-1	-1	-2	tolerated	0.18	benign	0.003	38	15.53
1292	CM	MYPN	NM_032578.3	c.2228C>A	p.(Pro743Gln)	3		HCM	890	3	2	rs138583865	3/246066=0	0/15304=0	0/33576=0	0/9842=0	0/17244=0	0/22300=0	2/111536=0	0/30782=0	1/5482=0	-1	-1	-2	deleterious	0.01	possibly_damaging	0.862	76	27.1
1293	CM	MYPN	NM_032578.2	c.2428C>T	p.(Arg810Cys)	3		HCM	687	1	1	rs369380120	5/245998=0	0/15302=0	0/33570=0	0/9828=0	0/17228=0	0/22270=0	5/111556=0	0/30764=0	0/5480=0	-3	-3	-4	tolerated	0.07		benign	0.425	180
1294	CM	MYPN	NM_032578.3	c.2461A>G	p.(Ser821Gly)	3		HCM	1022	4	3	rs766742025	6/276922=0	0/24034=0	0/34408=0	0/10130=0	6/18854=0	0/25766=0	0/126506=0	0/30768=0	0/6456=0	0	0	-1	tolerated	0.6	benign	0	56	13.38
1295	CM	MYPN	NM_032578.3	c.2468T>C	p.(Ile823Thr)	3		UCM	1125	3	1											-1	-1	-1	deleterious	0.01	probably_damaging	0.961	89	28.0
1296	CM	MYPN	NM_032578.3	c.251A>G	p.(Asn84Ser)	3		UCM	1126	1	1	rs768968410	14/277182=0	5/24034=0	2/34418=0	0/10150=0	1/18864=0	0/25790=0	6/126678=0	0/30780=0	0/6468=0	1	1	0	tolerated	0.78	benign	0.003	46	16.36
1297	CM	MYPN	NM_032578.3	c.251A>G	p.(Asn84Ser)	3		DCM	1213	2	2	rs768968410	14/277182=0	5/24034=0	2/34418=0	0/10150=0	1/18864=0	0/25790=0	6/126678=0	0/30780=0	0/6468=0	1	1	0	tolerated	0.78	benign	0.003	46	16.36
1298	CM	MYPN	NM_032578.3	c.2564+1G>C	p.?	3		UCM	1125	3	2														NA	NA	NA	NA	NA	34
1299	CM	MYPN	NM_032578.3	c.259C>G	p.(Pro87Ala)	3		DCM	1127	2	1	rs376945733	12/277160=0	10/24030=0	0/34416=0	0/10150=0	0/18860=0	1/25790=0	1/126664=0	0/30782=0	0/6468=0	-1	-1	-1	tolerated	0.12	benign	0.079	27	17.45
1300	CM	MYPN	NM_032578.3	c.2642A>T	p.(Asn881Ile)	3		DCM	1468	2	2	rs71584493	12/246096=0	0/15304=0	2/33578=0	0/9840=0	0/17232=0	0/22298=0	9/111580=0	0/30782=0	1/5482=0	-2	-3	-4	deleterious	0.01	benign	0.048	149	23.9
1301	CM	MYPN	NM_032578.3	c.2726A>C	p.(Glu909Ala)	3		HCM	1026	4	2											-1	-1	-1	deleterious	0	possibly_damaging	0.837	107	29.2
1302	CM	MYPN	NM_032578.2	c.2863C>T	p.(Arg955Trp)	3		DCM	418	3	2	rs149887823	131/276608=0	3/24024=0	6/34388=0	13/10134=0.001	0/18852=0	11/25792=0	93/126182=0.001	0/30780=0	5/6456=0.001	-2	-3	-4	deleterious	0		probably damaging	0.998	101
1303	CM	MYPN	NM_032578.3	c.2864G>A	p.(Arg955Gln)	3		HCM	751	4	3	rs199476414	17/276592=0	2/24028=0	4/34384=0	0/10134=0	0/18856=0	0/25790=0	10/126164=0	1/30778=0	0/6458=0	1	1	1	deleterious	0.01	probably_damaging	0.993	43	31
1304	CM	MYPN	NM_032578.3	c.2925+18C>T	p.?	3		UCM	1128	2	1	rs372714890	43/274980=0	39/23936=0.002	3/34288=0	0/10080=0	0/18810=0	0/25496=0	0/125200=0	0/30750=0	1/6420=0				NA	NA	NA	NA	NA	0.776
1305	CM	MYPN	NM_032578.3	c.3124C>T	p.(Arg1042Cys)	3		UCM	688	1	1	rs151282801	111/277162=0	3/24032=0	1/34400=0	0/10146=0	0/18868=0	7/25792=0	74/126676=0.001	24/30780=0.001	2/6468=0	-3	-3	-4	deleterious	0		probably damaging	0.997	180
1306	CM	MYPN	NM_032578.3	c.3124C>T	p.(Arg1042Cys)	3		UCM	1017	2	2	rs151282801	111/277162=0	3/24032=0	1/34400=0	0/10146=0	0/18868=0	7/25792=0	74/126676=0.001	24/30780=0.001	2/6468=0	-3	-3	-4	deleterious	0	probably_damaging	0.997	180	29.3
1307	CM	MYPN	NM_032578.3	c.3124C>T	p.(Arg1042Cys)	3		HCM	1129	1	1	rs151282801	111/277162=0	3/24032=0	1/34400=0	0/10146=0	0/18868=0	7/25792=0	74/126676=0.001	24/30780=0.001	2/6468=0	-3	-3	-4	deleterious	0	probably_damaging	0.997	180	29.3
1308	CM	MYPN	NM_032578.3	c.3124C>T	p.(Arg1042Cys)	3		UCM	1266	3	2	rs151282801	111/277162=0	3/24032=0	1/34400=0	0/10146=0	0/18868=0	7/25792=0	74/126676=0.001	24/30780=0.001	2/6468=0	-3	-3	-4	deleterious	0	probably_damaging	0.997	180	29.3
1309	CM	MYPN	NM_032578.3	c.3146G>C	p.(Gly1049Ala)	3		DCM	1248	2	2	rs878855165										0	0	0	tolerated	0.77	benign	0.003	60	18.50
1310	CM	MYPN	NM_032578.3	c.3170G>C	p.(Arg1057Pro)	3		ARVC	808	3	3	rs150414382	3/277014=0	0/24018=0	0/34410=0	0/10150=0	0/18868=0	3/25778=0	0/126554=0	0/30780=0	0/6456=0	-2	-2	-2	deleterious	0	possibly_damaging	0.656	103	27.5
1311	CM	MYPN	NM_032578.2	c.3335C>T	p.(Pro1112Leu)	3	2 (frequency in control databases)	DCM	416	3	3	rs71534278	851/277018=0.003	37/24030=0.002	131/34410=0.004	99/10142=0.01	2/18850=0	16/25786=0.001	337/126552=0.003	186/30782=0.006	43/6466=0.007	-3	-3	-3	tolerated	0.06		probably damaging	0.975	98
1312	CM	MYPN	NM_032578.2	c.3335C>T	p.(Pro1112Leu)	3	2 (frequency in control databases)	UCM	425	3	2	rs71534278	851/277018=0.003	37/24030=0.002	131/34410=0.004	99/10142=0.01	2/18850=0	16/25786=0.001	337/126552=0.003	186/30782=0.006	43/6466=0.007	-3	-3	-3	tolerated	0.06		probably damaging	0.975	98
1313	CM	MYPN	NM_032578.2	c.3335C>T	p.(Pro1112Leu)	3		HCM	957	2	2	rs71534278	851/277018=0.003	37/24030=0.002	131/34410=0.004	99/10142=0.01	2/18850=0	16/25786=0.001	337/126552=0.003	186/30782=0.006	43/6466=0.007	-3	-3	-3	tolerated	0.11	probably_damaging	0.975	98	25.9
1314	CM	MYPN	NM_032578.3	c.3335C>T	p.(Pro1112Leu)	3		UCM	1130	1	1	rs71534278	851/277018=0.003	37/24030=0.002	131/34410=0.004	99/10142=0.01	2/18850=0	16/25786=0.001	337/126552=0.003	186/30782=0.006	43/6466=0.007	-3	-3	-3	tolerated	0.11	probably_damaging	0.975	98	25.9
1315	CM	MYPN	NM_032578.3	c.342G>C	p.(Glu114Asp)	3		DCM	934	3	3		4/277120=0	1/24004=0	3/34420=0	0/10146=0	0/18850=0	0/25792=0	0/126664=0	0/30782=0	0/6462=0	2	2	1	tolerated	0.6	benign	0	0	15.80
1316	CM	MYPN	NM_032578.3	c.3593T>C	p.(Met1198Thr)	3		ARVC	488	2	2	rs755560876	8/245840=0	1/15286=0	0/33574=0	0/9828=0	0/17246=0	0/22300=0	7/111350=0	0/30778=0	0/5478=0	-1	-1	-1	tolerated	0.11		probably damaging	0.993	81
1317	CM	MYPN	NM_032578.3	c.3818C>T	p.(Pro1273Leu)	3		HCM	1122	2	2	rs148942084	23/277146=0	19/24038=0.001	0/34416=0	0/10150=0	0/18870=0	0/25784=0	4/126648=0	0/30778=0	0/6462=0	-3	-3	-3	tolerated	0.11	benign	0.014	98	13.56
1318	CM	MYPN	NM_032578.2	c.3934C>T	p.(Arg1312Trp)	3		DCM	689	1	1	rs142354704	63/277162=0	3/24034=0	0/34418=0	6/10148=0.001	48/18870=0.003	0/25784=0	5/126658=0	0/30782=0	1/6468=0	-2	-3	-4	deleterious	0.02		benign	0.446	101
1319	CM	MYPN	NM_032578.2	c.444dup	p.(Val149Serfs*5)	3		HCM	463	2	2											NA	NA	NA	NA	NA		NA	NA	NA
1320	CM	MYPN	NM_032578.3	c.459G>T	p.(Lys153Asn)	3		HCM	1131	2	1											0	0	0	deleterious	0	probably_damaging	0.997	94	24.7
1321	CM	MYPN	NM_032578.2	c.59A>G	p.(Tyr20Cys)	3		DCM	933	2	2	rs140148105	256/277138=0.001	10/24036=0	44/34414=0.001	0/10146=0	0/18866=0	0/25788=0	194/126652=0.002	0/30776=0	8/6460=0.001	-3	-2	-3	deleterious	0	probably_damaging	0.998	194	28.8
1322	CM	MYPN	NM_032578.2	c.59A>G	p.(Tyr20Cys)	3		HCM	983	3	2	rs140148105	256/277138=0.001	10/24036=0	44/34414=0.001	0/10146=0	0/18866=0	0/25788=0	194/126652=0.002	0/30776=0	8/6460=0.001	-3	-2	-3	deleterious	0	probably_damaging	0.998	194	28.8
1323	CM	MYPN	NM_032578.2	c.59A>G	p.(Tyr20Cys)	3		HCM	1132	2	1	rs140148105	256/277138=0.001	10/24036=0	44/34414=0.001	0/10146=0	0/18866=0	0/25788=0	194/126652=0.002	0/30776=0	8/6460=0.001	-3	-2	-3	deleterious	0	probably_damaging	0.998	194	28.8
1324	CM	MYPN	NM_032578.3	c.59A>G	p.(Tyr20Cys)	3		DCM	1133	1	1	rs140148105	256/277138=0.001	10/24036=0	44/34414=0.001	0/10146=0	0/18866=0	0/25788=0	194/126652=0.002	0/30776=0	8/6460=0.001	-3	-2	-3	deleterious	0	probably_damaging	0.998	194	28.8
1325	CM	MYPN	NM_032578.3	c.649G>A	p.(Ala217Thr)	3		DCM	1544	3	3											0	0	0	tolerated	0.51	benign	0	58	11.81
1326	CM	MYPN	NM_032578.3	c.662A>T	p.(Asp221Val)	3		DCM	1416	3	3	rs185841477	38/277100=0	0/24038=0	0/34418=0	1/10144=0	3/18856=0	6/25788=0	10/126626=0	14/30768=0	4/6462=0.001	-3	-3	-4	tolerated	0.08	possibly_damaging	0.462	152	24.3
1327	CM	MYPN	NM_032578.3	c.70del	p.(Thr24Profs*44)	3		NCCM	1516	6	5		1/30968=0	0/8728=0	0/838=0	0/302=0	0/1622=0	0/3488=0	1/15010=0	0/0=0	0/980=0				NA	NA	NA	NA	NA	33
1328	CM	NEXN	NM_144573.3	c.1955A>G	p.(Tyr652Cys)	4		DCM	1140	2	1	rs137853197	22/276138=0	0/23974=0	0/34384=0	0/10108=0	0/18846=0	1/25728=0	17/125922=0	2/30746=0	2/6430=0	-3	-2	-3	deleterious	0	probably_damaging	1	194	28.6
1329	CM	NEXN	NM_144573.3	c.1955A>G	p.(Tyr652Cys)	4		NCCM	1542	3	2	rs137853197	22/276138=0	0/23974=0	0/34384=0	0/10108=0	0/18846=0	1/25728=0	17/125922=0	2/30746=0	2/6430=0	-3	-2	-3	deleterious	0	probably_damaging	1	194	28.6
1330	CM	NEXN	NM_144573.3	c.1010T>C	p.(Ile337Thr)	3		HCM	1134	4	1	rs749553777	5/274294=0	2/23986=0	0/34408=0	0/10138=0	0/18846=0	0/25792=0	3/123916=0	0/30776=0	0/6432=0	-1	-1	-1	deleterious	0	benign	0.103	89	23.7
1331	CM	NEXN	NM_144573.3	c.1076A>T	p.(Glu359Val)	3		HCM	508	2	2											-3	-2	-3	tolerated	0.21		benign	0.018	121
1332	CM	NEXN	NM_144573.3	c.1112C>A	p.(Pro371Gln)	3		DCM	1135	2	1	rs200067011	4/275876=0	0/23838=0	0/34326=0	0/10104=0	0/18798=0	0/25750=0	4/126060=0	0/30556=0	0/6444=0	-1	-1	-2	deleterious	0	probably_damaging	1	76	25.3
1333	CM	NEXN	NM_144573.3	c.1174C>T	p.(Arg392*)	3		UCM	1136	4	1	rs750076188	7/276332=0	0/23944=0	0/34382=0	0/10114=0	0/18820=0	1/25768=0	6/126186=0	0/30664=0	0/6454=0	-5	-4	-6	NA	NA	NA	NA	NA	38
1334	CM	NEXN	NM_144573.3	c.1269A>T	p.(Glu423Asp)	3		HCM	1113	2	2											2	2	1	tolerated	0.11	benign	0.328	0	22.3
1335	CM	NEXN	NM_144573.3	c.1419_1421del	p.(Arg475del)	3		DCM	1010	4	3		3/30934=0	0/8724=0	0/828=0	0/302=0	0/1622=0	1/3480=0	0/14998=0	0/0=0	2/980=0.002				NA	NA	NA	NA	NA	17.34
1336	CM	NEXN	NM_144573	c.1453G>A	p.(Glu485Lys)	3		DCM	1137	1	1	rs368812830	17/276680=0	0/23978=0	2/34400=0	0/10122=0	0/18862=0	0/25784=0	14/126384=0	0/30696=0	1/6454=0	1	1	1	deleterious	0	probably_damaging	0.993	56	32
1337	CM	NEXN	NM_144573.3	c.1453G>A	p.(Glu485Lys)	3		DCM	1532	1	1	rs368812830	17/276680=0	0/23978=0	2/34400=0	0/10122=0	0/18862=0	0/25784=0	14/126384=0	0/30696=0	1/6454=0	1	1	1	deleterious	0	probably_damaging	0.993	56	32
1338	CM	NEXN	NM_144573.3	c.1585C>A	p.(Gln529Lys)	3		HCM	752	6	3	rs766323670	2/245380=0	0/15258=0	0/33570=0	0/9824=0	0/17212=0	0/22290=0	2/111016=0	0/30748=0	0/5462=0	1	1	1	tolerated	0.1	benign	0.007	53	20.6
1339	CM	NEXN	NM_144573.3	c.1788T>G	p.(Ser596Arg)	3		UCM	1138	1	1	rs199738750	70/276696=0	4/23986=0	7/34398=0	0/10132=0	0/18856=0	0/25786=0	56/126330=0	0/30768=0	3/6440=0	-1	-1	-1	deleterious	0.03	possibly_damaging	0.702	110	22.3
1340	CM	NEXN	NM_144573.3	c.1788T>G	p.(Ser596Arg)	3		DCM	1139	1	1	rs199738750	70/276696=0	4/23986=0	7/34398=0	0/10132=0	0/18856=0	0/25786=0	56/126330=0	0/30768=0	3/6440=0	-1	-1	-1	deleterious	0.03	possibly_damaging	0.702	110	22.3
1341	CM	NEXN	NM_144573.3	c.1996A>G	p.(Thr666Ala)	3		HCM	1280	2	2	rs374000722	9/276032=0	0/23952=0	1/34318=0	0/10110=0	0/18808=0	0/25754=0	7/125948=0	0/30712=0	1/6430=0	0	0	0	deleterious	0.02	benign	0.247	58	22.9
1342	CM	NEXN	NM_144573.3	c.2012T>C	p.(Ile671Thr)	3		DCM	421	3	3	rs747781785	7/275486=0	1/23934=0	3/34290=0	2/10086=0	0/18776=0	0/25758=0	0/125546=0	0/30672=0	1/6424=0	-1	-1	-1	deleterious	0		probably damaging	0.936	89
1343	CM	NEXN	NM_144573.3	c.620A>G	p.(Asp207Gly)	3		DCM	1416	3	2	rs570946423	6/245874=0	0/15280=0	2/33570=0	0/9842=0	0/17244=0	0/22298=0	2/111394=0	1/30776=0	1/5470=0	-1	-1	-2	deleterious	0.02	possibly_damaging	0.505	94	24.1
1344	CM	NEXN	NM_144573.3	c.647G>A	p.(Arg216Gln)	3		HCM	1439	2	2	rs774953468	4/245790=0	0/15282=0	0/33572=0	0/9836=0	0/17246=0	0/22294=0	1/111312=0	3/30778=0	0/5470=0	1	1	1	deleterious	0.03	benign	0.003	43	13.14
1345	CM	NEXN	NM_144573.3	c.67G>Ap	p.(Val23Ile)	3		HCM	910	2	2	rs571729575	1/246130=0	0/15282=0	0/33574=0	0/9848=0	0/17246=0	0/22298=0	1/111640=0	0/30766=0	0/5476=0	3	3	3	tolerated	0.05	benign	0.297	29	22.7
1346	CM	NEXN	NM_144573.3	c.874G>A	p.(Asp292Asn)	3		DCM	690	1	1	rs373377525										2	1	1	tolerated	0.14		benign	0.024	23
1347	CM	NEXN	NM_144573.3	c.935T>A	p.(Leu312His)	3		ARVC	1141	2	1											-2	-3	-3	deleterious	0.04	probably_damaging	0.976	99	27.0
1348	CM	NEXN	NM_144573.3	c.995_997del	p.(Glu332del)	3		DCM	1046	7	2		26/273684=0	1/23946=0	2/34386=0	0/10122=0	0/18780=0	0/25772=0	4/123498=0	19/30770=0.001	0/6410=0				NA	NA	NA	NA	NA	20.5
1349	AR	NKX2-5		c.697G>A	p.(Asp233Asn)	3		LQTS	267	4	4		1/30942=0	0/8716=0	0/838=0	0/302=0	0/1622=0	0/3480=0	1/15002=0	0/0=0	0/982=0	2	1	1	tolerated	0.11	benign	0.046	23	23.7
1350	AR	NPPA	NM_006172.3	c.347G>A	p.(Arg116Lys)	3		UA	281	1	1	rs745922613	1/244846=0	0/15288=0	0/33556=0	0/9828=0	0/17236=0	0/22286=0	0/110420=0	0/30764=0	1/5468=0	3	2	2	deleterious	0.03	possibly_damaging	0.891	26	24.8
1351	AR	NPPA	NM_006172.3	c.209C>T	p.(Ala70Val)	3		UA	280	1	1	rs13305987	5/245264=0	0/15266=0	0/33552=0	0/9834=0	0/17244=0	0/22282=0	2/110838=0	3/30774=0	0/5474=0	0	0	0	tolerated	0.1	benign	0.007	64	6178
1352	both	PKP2	NM_004572.3	c.1035-11del	p.?	3		ARVC	288	1	1		3/276844=0	0/24030=0	0/34416=0	0/10148=0	0/18870=0	0/25470=0	3/126666=0	0/30782=0	0/6462=0				NA	NA	NA	NA	NA	9439
1353	both	PKP2	NM_004572.3	c.14G>A p	p.(Gly5Asp)	3		SSS	284	2	1	rs774778142	3/81186=0	0/1468=0	0/15586=0	0/5928=0	0/3998=0	0/4490=0	1/30654=0	2/16728=0	0/2334=0	-1	-1	-2	deleterious	0.03	possibly_damaging	0.637	94	25.0
1354	both	PKP2	NM_004572.3	c.1687A>C	p.(=)	3		UA	289	1	1														NA	NA	NA	NA	NA	22.0
1355	both	PKP2	NM_004572.3	c.184C>A	p.(Gln62Lys)	3		UA	287	1	1	rs199601548	40/241642=0	3/20644=0	1/32426=0	0/9416=0	0/17284=0	2/15978=0	34/111412=0	0/28692=0	0/5790=0	1	1	1	deleterious	0.02	benign	0.058	53	23.8
1356	both	PKP2	NM_004572.3	c.193G>T	p.(Ala65Ser)	3		UA	286	1	1	rs143323961	0/203304=0	0/10988=0	0/30628=0	0/8744=0	0/14620=0	0/12340=0	0/93512=0	0/27816=0	0/4656=0	1	1	1	tolerated	0.11	possibly_damaging	0.665	99	24.1
1357	both	PKP2	NM_004572.3	c.364C>T	p.(Arg122Cys)	3		UA	285	1	1	rs759377911	9/273582=0	0/23414=0	0/34124=0	0/9934=0	1/18844=0	3/25750=0	5/124760=0	0/30370=0	0/6386=0	-3	-3	-4	tolerated	0.18	possibly_damaging	0.543	180	22.6
1358	both	PKP2	NM_004572.3	c.655A>G	p.(Arg219Gly)	3		UA	15	2	2											-2	-2	-3	deleterious	0.02	possibly damaging	0.799	125	23.0
1359	both	PKP2	NM_004572.3	[GRCh37] chr12:32945338-32977116del		5		UCM	1150	1	1
1360	both	PKP2	NM_004572.3	c.-1612-?_1770+?del	p.?	5		ARVC	1142	1	1
1361	both	PKP2	NM_004572.3	c.1171-2A>G	p.?	5		ARVC	1144	3	1	rs794729133													NA	NA	NA	NA	NA	26.7
1362	both	PKP2	NM_004572.3	c.1211dup	p.(Val406Serfs*4)	5		ARVC	1146	1	1	rs397516989													NA	NA	NA	NA	NA	34
1363	both	PKP2	NM_004572.3	c.1369_1372del	p.(Gln457*)	5		ARVC	1147	3	1	rs199571473													NA	NA	NA	NA	NA	35
1364	both	PKP2	NM_004572.3	c.148_151del	p.(Thr50Serfs*61)	5		ARVC	1148	1	1	rs397516997													NA	NA	NA	NA	NA	32
1365	both	PKP2	NM_004572.3	c.1936G>T	p.(Gly646*)	5		UCM	1154	2	1											-5	-4	-6	NA	NA	NA	NA	NA	40
1366	both	PKP2	NM_004572.3	c.1951C>T	p.(Arg651*)	5		ARVC	1155	2	1	rs751288871	2/277026=0	0/24020=0	0/34418=0	0/10150=0	1/18868=0	0/25736=0	1/126590=0	0/30782=0	0/6462=0	-5	-4	-6	NA	NA	NA	NA	NA	38
1367	both	PKP2	NM_004572.3	c.235C>T	p.(Arg79*)	5		ARVC	555	1	1	rs121434420	1/246126=0	0/15298=0	0/33582=0	0/9848=0	0/17248=0	0/22240=0	1/111652=0	0/30780=0	0/5478=0	NA	NA	NA	NA	NA		NA	NA	NA
1368	both	PKP2	NM_004572.3	c.235C>T	p.(Arg79*)	5		ARVC	1157	1	1	rs121434420	1/246126=0	0/15298=0	0/33582=0	0/9848=0	0/17248=0	0/22240=0	1/111652=0	0/30780=0	0/5478=0	-5	-4	-6	NA	NA	NA	NA	NA	38
1369	both	PKP2	NM_004572.3	c.2386T>C	p.(Cys796Arg)	5		ARVC	1158	1	1	rs794729098										-3	-3	-4	deleterious	0	possibly_damaging	0.862	180	27.9
1370	both	PKP2	NM_004572.3	c.2489+1G>A	p.?	5		ARVC	1159	2	1	rs111517471	6/277168=0	2/24030=0	0/34418=0	0/10152=0	0/18866=0	0/25794=0	4/126660=0	0/30782=0	0/6466=0				NA	NA	NA	NA	NA	27.0
1371	both	PKP2	NM_004572.3	c.368G>A	p.(Trp123*)	5		ARVC	1160	2	1	rs760576804										-5	-4	-6	NA	NA	NA	NA	NA	36
1372	both	PKP2	NM_004572.3	c.397C>T	p.(Gln133*)	5		UCM	556	1	1	rs794729132										NA	NA	NA	NA	NA		NA	NA	NA
1373	both	PKP2	NM_004572.3	c.397C>T	p.(Gln133*)	5		ARVC	1161	2	1	rs794729132										-5	-4	-6	NA	NA	NA	NA	NA	36
1374	both	PKP2	NM_004572.3	c.397C>T	p.(Gln133*)	5		ARVC	1162	1	1	rs794729132										-5	-4	-6	NA	NA	NA	NA	NA	36
1375	both	PKP2	NM_004572.3	c.397C>T	p.(Gln133*)	5		ARVC	1163	2	1	rs794729132										-5	-4	-6	NA	NA	NA	NA	NA	36
1376	both	PKP2	NM_004572.3	c.1035-11del	p.?	3		ARVC	1143	1	1		3/276844=0	0/24030=0	0/34416=0	0/10148=0	0/18870=0	0/25470=0	3/126666=0	0/30782=0	0/6462=0				NA	NA	NA	NA	NA	9439
1377	both	PKP2	NM_004572.3	c.1073G>A	p.(Ser358Asn)	3		UA	311	2	2		1/277038=0	0/24034=0	0/34416=0	0/10152=0	1/18868=0	0/25662=0	0/126658=0	0/30782=0	0/6466=0	1	1	0	tolerated	1	benign	0	46	7256
1378	both	PKP2	NM_004572.3	c.1093A>G	p.(Met365Val)	3		HCM	503	2	2	rs143900944	66/277078=0	0/24038=0	0/34416=0	0/10152=0	0/18870=0	0/25696=0	30/126658=0	35/30782=0.001	1/6466=0	1	1	1	tolerated	0.31		benign	0	21
1379	both	PKP2	NM_004572.3	c.1183C>T	p.(Arg395Cys)	3		UCM	1145	2	1	rs761238380	1/245810=0	0/15302=0	0/33582=0	0/9848=0	0/17242=0	0/22216=0	0/111358=0	1/30782=0	0/5480=0	-3	-3	-4	deleterious	0.03	possibly_damaging	0.863	180	24.4
1380	both	PKP2	NM_004572.3	c.1372A>G	p.(Ile458Val)	3		UA	74	1	1	rs199571473	276/276650=0.001	1/24020=0	1/34420=0	0/10152=0	1/18858=0	0/25790=0	5/126168=0	264/30782=0.009	4/6460=0.001	3	3	3	deleterious	0.02	possibly damaging	0.819	29	24.7
1381	both	PKP2	NM_004572.3	c.1454G>A	p.(Gly485Glu)	3		HCM	817	3	2	rs757689437	2/264984=0	0/23720=0	0/34258=0	0/10066=0	0/18616=0	0/18690=0	2/122590=0	0/30688=0	0/6356=0	-2	-2	-3	tolerated	0.49	benign	0.022	98	6267
1382	both	PKP2	NM_004572.3	c.14G>A	p.(Gly5Asp)	3		BRS	72	1	1	rs774778142	3/81186=0	0/1468=0	0/15586=0	0/5928=0	0/3998=0	0/4490=0	1/30654=0	2/16728=0	0/2334=0	-1	-1	-2	deleterious	0.03	probably damaging	0.964	94	24.1
1383	both	PKP2	NM_004572.3	c.1652A>G	p.(Asp551Gly)	3		HCM	1149	5	1											-1	-1	-2	deleterious	0	probably_damaging	0.999	94	29.4
1384	both	PKP2	NM_004572.3	c.1742G>A	p.(Gly581Glu)	3		DCM	842	4	3	rs866789949	3/245962=0	0/15300=0	0/33576=0	0/9844=0	0/17234=0	0/22156=0	3/111590=0	0/30782=0	0/5480=0	-2	-2	-3	deleterious	0	probably_damaging	0.993	98	25.8
1385	both	PKP2	NM_004572.3	c.1742G>A	p.(Gly581Glu)	3		DCM	1151	1	1	rs866789949	3/245962=0	0/15300=0	0/33576=0	0/9844=0	0/17234=0	0/22156=0	3/111590=0	0/30782=0	0/5480=0	-2	-2	-3	deleterious	0	probably_damaging	0.993	98	25.8
1386	both	PKP2	NM_004572.3	c.184C>A	p.(Gln62Lys)	3		UCM	691	1	1	rs199601548	40/241642=0	3/20644=0	1/32426=0	0/9416=0	0/17284=0	2/15978=0	34/111412=0	0/28692=0	0/5790=0	1	1	1	tolerated	0.08		benign	0.039	53
1387	both	PKP2	NM_004572.3	c.184C>A	p.(Gln62Lys)	3		UCM	1152	1	1	rs199601548	40/241642=0	3/20644=0	1/32426=0	0/9416=0	0/17284=0	2/15978=0	34/111412=0	0/28692=0	0/5790=0	1	1	1	deleterious	0.02	benign	0.058	53	23.8
1388	both	PKP2	NM_004572.3	c.184C>A	p.(Gln62Lys)	3		HCM	1153	2	1	rs199601548	40/241642=0	3/20644=0	1/32426=0	0/9416=0	0/17284=0	2/15978=0	34/111412=0	0/28692=0	0/5790=0	1	1	1	deleterious	0.02	benign	0.058	53	23.8
1389	both	PKP2	NM_004572.3	c.184C>A	p.(Gly646*)	3		UCM	1154	2	2	rs199601548	40/241642=0	3/20644=0	1/32426=0	0/9416=0	0/17284=0	2/15978=0	34/111412=0	0/28692=0	0/5790=0	1	1	1	deleterious	0.02	benign	0.058	53	23.8
1390	both	PKP2	NM_004572.3	c.184C>A	p.(Gln62Lys)	3		HCM	1551	2	1	rs199601548	40/241642=0	3/20644=0	1/32426=0	0/9416=0	0/17284=0	2/15978=0	34/111412=0	0/28692=0	0/5790=0	1	1	1	deleterious	0.02	benign	0.058	53	23.8
1391	both	PKP2	NM_004572.3	c.184C>A	p.(Gln62Lys)	3		UA	282	1	1	rs199601548	40/241642=0	3/20644=0	1/32426=0	0/9416=0	0/17284=0	2/15978=0	34/111412=0	0/28692=0	0/5790=0	1	1	1	deleterious	0.02	benign	0.058	53	23.8
1392	both	PKP2	NM_004572.3	c.1957A>G	p.(Arg653Gly)	3		HCM	1528	2	2	rs775103879	4/277122=0	4/24036=0	0/34418=0	0/10152=0	0/18866=0	0/25726=0	0/126680=0	0/30782=0	0/6462=0	-2	-2	-3	deleterious	0.03	possibly_damaging	0.904	125	28.0
1393	both	PKP2	NM_004572.3	c.2062T>C	p.(Ser688Pro)	3		ARVC	1156	4	1	rs144601090	12/277110=0	11/24028=0	1/34410=0	0/10150=0	0/18856=0	0/25790=0	0/126630=0	0/30782=0	0/6464=0	-1	-1	-1	deleterious	0	probably_damaging	0.994	74	26.6
1394	both	PKP2	NM_004572.3	c.2087A>G	p.(Asn696Ser)	3		HCM	919	3	2	rs140852019	53/277160=0	44/24032=0.002	8/34418=0	0/10150=0	0/18850=0	0/25792=0	0/126672=0	0/30780=0	1/6466=0	1	1	0	tolerated	0.24	benign	0.025	46	17.85
1395	both	PKP2	NM_004572.3	c.2087A>G	p.(Asn696Ser)	3		HCM	1058	4	2	rs140852019	53/277160=0	44/24032=0.002	8/34418=0	0/10150=0	0/18850=0	0/25792=0	0/126672=0	0/30780=0	1/6466=0	1	1	0	tolerated	0.24	benign	0.025	46	17.85
1396	both	PKP2	NM_004572.3	c.2087A>G	p.(Asn696Ser)	3		HCM	1085	4	2	rs140852019	53/277160=0	44/24032=0.002	8/34418=0	0/10150=0	0/18850=0	0/25792=0	0/126672=0	0/30780=0	1/6466=0	1	1	0	tolerated	0.24	benign	0.025	46	17.85
1397	both	PKP2	NM_004572.3	c.2332A>G	p.(Ile778Val)	3		UA	215	2	2	rs556563706	9/246084=0	0/15300=0	0/33578=0	0/9840=0	9/17234=0.001	0/22294=0	0/111594=0	0/30768=0	0/5476=0	3	3	3	tolerated	0.06	benign	0.007	29	21.5	26.1
1398	both	PKP2	NM_004572.3	c.2345T>C	p.(Val782Ala)	3		UCM	964	3	2											0	0	0	tolerated	0.57	benign	0.243	64	22.3
1399	both	PKP2	NM_004572.3	c.2396T>C	p.(Leu799Ser)	3		ARVC	1569	2	1											-3	-2	-3	deleterious	0.01	benign	0.071	145	24.2
1400	both	PKP2	NM_004572.3	c.2570A>T	p.(Tyr857Phe)	3		DCM	692	1	1	rs751287217	1/246212=0	0/15302=0	0/33580=0	0/9848=0	0/17246=0	0/22300=0	1/111670=0	0/30782=0	0/5484=0	3	3	3	tolerated	0.2		benign	0.027	22
1401	both	PKP2	NM_004572.3	c.2612G>A	p.(Arg871Gln)	3		UA	283	1	1	rs372263407	16/277178=0	2/24032=0	3/34416=0	0/10150=0	0/18868=0	1/25792=0	2/126676=0	8/30782=0	0/6462=0	1	1	1	deleterious	0	benign	0.199	43	24.9
1402	both	PKP2	NM_004572.3	c.336+17T>G	p.?	3		HCM	1261	2	2	rs185681814	55/277100=0	0/24034=0	14/34416=0	4/10146=0	0/18868=0	0/25750=0	31/126644=0	0/30782=0	6/6460=0.001				NA	NA	NA	NA	NA	0.286
1403	both	PKP2	NM_004572.3	c.467C>T	p.(Pro156Leu)	3		DCM	1111	3	2	rs766360871	2/246234=0	0/15298=0	1/33582=0	0/9850=0	1/17248=0	0/22296=0	0/111694=0	0/30782=0	0/5484=0	-3	-3	-3	deleterious	0	probably_damaging	0.95	98	23.9
1404	both	PKP2	NM_004572.3	c.713C>T	p.(Pro238Leu)	3		UCM	491	2	2	rs560220280	11/246110=0	0/15296=0	0/33580=0	0/9848=0	0/17246=0	0/22238=0	0/111638=0	11/30778=0	0/5486=0	-3	-3	-3	deleterious	0		possibly damaging	0.807	98
1405	both	PKP2	NM_004572.3	c.725C>T	p.(Thr242Met)	3		Other indication	73	1	1	rs201580443	32/277072=0	0/24016=0	0/34410=0	0/10152=0	24/18870=0.001	0/25732=0	6/126644=0	2/30782=0	0/6466=0	-1	-1	-1	tolerated	0.09	benign	0.072	81	17.85
1406	both	PKP2	NM_004572.3	c.725C>T	p.(Thr242Met)	3		SSS	377	2	2	rs201580443	32/277072=0	0/24016=0	0/34410=0	0/10152=0	24/18870=0.001	0/25732=0	6/126644=0	2/30782=0	0/6466=0	-1	-1	-1	tolerated	0.26	benign	0.01	81	15.28
1407	both	PKP2	NM_004572.3	c.725C>T	p.(Thr242Met)	3		ARVC	1164	1	1	rs397517906	2/246234=0	0/15302=0	0/33582=0	0/9848=0	0/17248=0	0/22276=0	0/111710=0	2/30782=0	0/5486=0	0	0	0	deleterious	0.01	possibly_damaging	0.657	64	26.0
1408	both	PKP2	NM_004572.3	c.788C>T	p.(Arg1436Cys)	3		HCM	1048	2	2	rs543758984	5/245982=0	1/15296=0	0/33578=0	0/9850=0	0/17248=0	0/22236=0	3/111508=0	0/30782=0	1/5484=0	-1	-1	-1	deleterious	0.04	benign	0.373	81	13.83
1409	both	PKP2	NM_004572.3	c.826C>T	p.(Pro276Ser)	3		HCM	1165	1	1	rs201944276	43/276812=0	0/24026=0	0/34418=0	36/10148=0.004	0/18864=0	0/25700=0	7/126412=0	0/30782=0	0/6462=0	-1	-1	-1	tolerated	0.6	benign	0.001	74	5559
1410	both	PKP2	NM_004572.3	c.895C>T	p.(Arg299Cys)	3		HCM	414	3	3	rs564987195	18/276820=0	0/24034=0	0/34412=0	0/10152=0	0/18856=0	0/25648=0	6/126474=0	12/30782=0	0/6462=0	-3	-3	-4	tolerated	0.06		benign	0.306	180
1411	both	PKP2	NM_001105206.2	c.964G>T	p.(Gly322Cys)	3		HCM	1166	2	1	rs200069860	25/276374=0	24/24022=0.001	0/34412=0	0/10130=0	0/18868=0	0/25762=0	0/125944=0	0/30782=0	1/6454=0	-3	-3	-4	deleterious	0.01	probably_damaging	0.991	159	24.5
1412	both	PKP2	NM_004572.3	c.971C>T	p.(Ala324Val)	3		HCM	1167	2	1	rs529523595	6/245092=0	1/15272=0	1/33570=0	0/9832=0	0/17246=0	0/22280=0	1/110646=0	2/30778=0	1/5468=0	0	0	0	tolerated	1	benign	0	64	3075
1413	both	PLN	NM_002667.3	c.40_42del	p.(Arg14del)	5		VT	291	1	1	rs774556120	1/30970=0	0/8726=0	0/838=0	0/302=0	0/1622=0	0/3494=0	1/15006=0	0/0=0	0/982=0				NA	NA	NA	NA	NA	19.44
1414	both	PLN	NM_002667.3	c.40_42del	p.(Arg14del)	5		UA	292	1	1	rs774556120	1/30970=0	0/8726=0	0/838=0	0/302=0	0/1622=0	0/3494=0	1/15006=0	0/0=0	0/982=0				NA	NA	NA	NA	NA	19.44
1415	both	PLN	NM_002667.3	c.40_42del	p.(Arg14del)	5		LQTS	290	1	1	rs774556120	1/30970=0	0/8726=0	0/838=0	0/302=0	0/1622=0	0/3494=0	1/15006=0	0/0=0	0/982=0				NA	NA	NA	NA	NA	19.44
1416	both	PLN	NM_002667.3	c.40_42del	p.(Arg14del)	5		UA	293	2	1	rs774556120	1/30970=0	0/8726=0	0/838=0	0/302=0	0/1622=0	0/3494=0	1/15006=0	0/0=0	0/982=0				NA	NA	NA	NA	NA	19.44
1417	both	PLN	NM_002667.3	c.40_42del	p.(Arg14del)	5		HCM	558	1	1	rs397516784										NA	NA	NA	NA	NA		NA	NA	NA
1418	both	PLN	NM_004572.3	c.40_42del	p.(Arg14del)	5		DCM	557	1	1	rs397516784										NA	NA	NA	NA	NA		NA	NA	NA
1419	both	PLN	NM_002667.3	c.40_42del	p.(Arg14del)	5		DCM	559	1	1	rs397516784										NA	NA	NA	NA	NA		NA	NA	NA
1420	both	PLN	NM_002667.3	c.40_42del	p.(Arg14del)	5		DCM	560	1	1	rs397516784										NA	NA	NA	NA	NA		NA	NA	NA
1421	both	PLN	NM_002667.3	c.40_42del	p.(Arg14del)	5		DCM	561	1	1	rs397516784										NA	NA	NA	NA	NA		NA	NA	NA
1422	both	PLN	NM_002667.3	c.40_42del	p.(Arg14del)	5		DCM	562	1	1	rs397516784										NA	NA	NA	NA	NA		NA	NA	NA
1423	both	PLN	NM_002667.3	c.40_42del	p.(Arg14del)	5		UCM	1168	3	1	rs774556120	1/30970=0	0/8726=0	0/838=0	0/302=0	0/1622=0	0/3494=0	1/15006=0	0/0=0	0/982=0				NA	NA	NA	NA	NA	19.44
1424	both	PLN	NM_002667.3	c.40_42del	p.(Arg14del)	5		DCM	1169	1	1	rs774556120	1/30970=0	0/8726=0	0/838=0	0/302=0	0/1622=0	0/3494=0	1/15006=0	0/0=0	0/982=0				NA	NA	NA	NA	NA	19.44
1425	both	PLN	NM_002667.3	c.40_42del	p.(Arg14del)	5		ARVC	1170	1	1	rs774556120	1/30970=0	0/8726=0	0/838=0	0/302=0	0/1622=0	0/3494=0	1/15006=0	0/0=0	0/982=0				NA	NA	NA	NA	NA	19.44
1426	both	PLN	NM_002667.3	c.40_42del	p.(Arg14del)	5		DCM	1171	1	1	rs774556120	1/30970=0	0/8726=0	0/838=0	0/302=0	0/1622=0	0/3494=0	1/15006=0	0/0=0	0/982=0				NA	NA	NA	NA	NA	19.44
1427	both	PLN	NM_002667.3	c.40_42del	p.(Arg14del)	5		DCM	1172	2	1	rs774556120	1/30970=0	0/8726=0	0/838=0	0/302=0	0/1622=0	0/3494=0	1/15006=0	0/0=0	0/982=0				NA	NA	NA	NA	NA	19.44
1428	both	PLN	NM_002667.3	c.40_42del	p.(Arg14del)	5		DCM	1173	2	1	rs774556120	1/30970=0	0/8726=0	0/838=0	0/302=0	0/1622=0	0/3494=0	1/15006=0	0/0=0	0/982=0				NA	NA	NA	NA	NA	19.44
1429	both	PLN	NM_002667.3	c.40_42del	p.(Arg14del)	5		ARVC	1174	1	1	rs774556120	1/30970=0	0/8726=0	0/838=0	0/302=0	0/1622=0	0/3494=0	1/15006=0	0/0=0	0/982=0				NA	NA	NA	NA	NA	19.44
1430	both	PLN	NM_002667.3	c.40_42del	p.(Arg14del)	5		DCM	1175	4	1	rs774556120	1/30970=0	0/8726=0	0/838=0	0/302=0	0/1622=0	0/3494=0	1/15006=0	0/0=0	0/982=0				NA	NA	NA	NA	NA	19.44
1431	both	PLN	NM_002667.3	c.40_42del	p.(Arg14del)	5		DCM	1176	2	1	rs774556120	1/30970=0	0/8726=0	0/838=0	0/302=0	0/1622=0	0/3494=0	1/15006=0	0/0=0	0/982=0				NA	NA	NA	NA	NA	19.44
1432	both	PLN	NM_002667.3	c.40_42del	p.(Arg14del)	5		DCM	1177	2	1	rs774556120	1/30970=0	0/8726=0	0/838=0	0/302=0	0/1622=0	0/3494=0	1/15006=0	0/0=0	0/982=0				NA	NA	NA	NA	NA	19.44
1433	both	PLN	NM_002667.3	c.40_42del	p.(Arg14del)	5		UCM	1587	3	1	rs774556120	1/30970=0	0/8726=0	0/838=0	0/302=0	0/1622=0	0/3494=0	1/15006=0	0/0=0	0/982=0				NA	NA	NA	NA	NA	19.44
1434	both	PLN	NM_002667.3	c.40_42del	p.(Arg14del)	5		UCM	1587	3	3	rs774556120	1/30970=0	0/8726=0	0/838=0	0/302=0	0/1622=0	0/3494=0	1/15006=0	0/0=0	0/982=0				NA	NA	NA	NA	NA	19.44
1435	both	PLN	NM_002667.3	c.73C>T	p.(Arg25Cys)	5		DCM	1245	3	2	rs761056344	7/245944=0	0/15300=0	3/33576=0	0/9840=0	1/17244=0	0/22298=0	3/111422=0	0/30782=0	0/5482=0				deleterious	0	possibly_damaging	0.488	180	25.7
1436	both	PLN	NM_002667.3	6q22.31(118,619,396-119,729,843)	triplication entire gene	4		UCM	1178	1	1
1437	both	PPA2	NM_176869.2	c.16C>G	p.(Arg6Gly)	3		SSS	295	1	1	rs769620452	2/200640=0	0/10680=0	0/30112=0	0/8702=0	0/14694=0	0/18512=0	2/85160=0	0/28138=0	0/4642=0	-2	-2	-3	tolerated	0.42	benign	0	125	15.94
1438	both	PPA2	NM_176869.2	c.514G>A	p.(Glu172Lys)	3		LQTS	294	1	1	rs146013446	140/269750=0.001	5/23790=0	2/32832=0	0/9826=0	0/18394=0	12/25558=0	115/124500=0.001	5/28570=0	1/6280=0	1	1	1	deleterious	0	probably_damaging	0.985	56	33
1439	both	PPA2	NM_176869.2	c.267+2T>C	p.?	3		CPVT	1548	2	2	rs540217910	1/239486=0	1/14984=0	0/31644=0	0/9672=0	0/16886=0	0/22214=0	0/110072=0	0/28732=0	0/5282=0				NA	NA	NA	NA	NA	26.8
1440	both	PPA2	NM_176869.2	c.267+2T>C	p.?	3		UCM	1549	2	2	rs540217910	1/239486=0	1/14984=0	0/31644=0	0/9672=0	0/16886=0	0/22214=0	0/110072=0	0/28732=0	0/5282=0				NA	NA	NA	NA	NA	26.8
1441	both	PPA2	NM_176869.2	c.514G>A	p.(Glu172Lys)	3		DCM	882	3	3	rs146013446	140/269750=0.001	5/23790=0	2/32832=0	0/9826=0	0/18394=0	12/25558=0	115/124500=0.001	5/28570=0	1/6280=0	1	1	1	deleterious	0	probably_damaging	0.985	56	33
1442	CM	PRDM16	NM_022114.3	c.37+1G>A	p.?	4		UCM	1198	3	1														NA	NA	NA	NA	NA	23.5
1443	CM	PRDM16	NM_022114.3	c.676+1G>A	p.?	4		NCCM	1200	1	1	rs555368959													NA	NA	NA	NA	NA	27.3
1444	CM	PRDM16	NM_022114.3	c.1040C>T	p.(Thr347Met)	3		HCM	983	3	3	rs746868217	7/224798=0	0/14596=0	0/30340=0	0/8408=0	0/15926=0	0/21478=0	7/101520=0	0/27590=0	0/4940=0	-1	-1	-1	deleterious	0	probably_damaging	0.998	81	27.6
1445	CM	PRDM16	NM_022114.3	c.109G>A	p.(Glu37Lys)	3		DCM	421	3	2	rs369539275	10/275638=0	0/23902=0	0/34412=0	0/10112=0	4/18832=0	0/25780=0	5/125392=0	0/30776=0	1/6432=0	1	1	1	deleterious	0		possibly damaging	0.805	56
1446	CM	PRDM16	NM_022114.3	c.1325G>A	p.(Arg442Gln)	3		UCM	1179	1	1	rs760272889	5/246172=0	2/15296=0	0/33576=0	0/9850=0	0/17246=0	0/22300=0	3/111644=0	0/30780=0	0/5480=0	1	1	1	deleterious	0.01	probably_damaging	0.998	43	31
1447	CM	PRDM16	NM_022114.3	c.1394C>T	p.(Pro465Leu)	3		DCM	1180	2	1	rs767571135	5/245488=0	0/15248=0	0/33572=0	0/9824=0	0/17240=0	0/22298=0	5/111058=0	0/30780=0	0/5468=0	-3	-3	-3	tolerated	0.14	benign	0.054	98	22.2
1448	CM	PRDM16	NM_022114.3	c.1573C>T	p.(Arg525Trp)	3		DCM	1474	2	2	rs886041395	5/243366=0	0/15140=0	0/33486=0	0/9804=0	0/17148=0	0/20584=0	5/111110=0	0/30658=0	0/5436=0	-2	-3	-4	deleterious	0	probably_damaging	0.998	101	29.6
1449	CM	PRDM16	NM_022114.3	c.1598C>T	p.(Ser533Leu)	3		ARVC	1161	2	2	rs540487766	6/274440=0	3/23838=0	2/34350=0	0/10128=0	0/18760=0	0/24158=0	1/126086=0	0/30708=0	0/6412=0	-3	-2	-3	tolerated	0.07	benign	0.015	145	21.5
1450	CM	PRDM16	NM_022114.3	c.1823A>C	p.(Asn608Thr)	3		DCM	1181	1	1											0	0	0	deleterious	0.01	possibly_damaging	0.906	65	25.3
1451	CM	PRDM16	NM_022114.3	c.1882G>A	p.(Asp628Asn)	3		DCM	812	3	3	rs730880114	10/243562=0	0/15086=0	0/33446=0	0/9806=0	0/17142=0	2/21802=0	8/110158=0	0/30706=0	0/5416=0	0	0	0	tolerated	0.25	benign	0.079	58	15.63
1452	CM	PRDM16	NM_022114.3	c.1882G>A	p.(Asp628Asn)	3		HCM	994	2	2	rs199895459	58/265194=0	6/23830=0	0/33156=0	0/8916=0	1/18576=0	1/24976=0	48/121022=0	2/28620=0	0/6098=0	2	1	1	deleterious	0.02	possibly_damaging	0.549	23	26.6
1453	CM	PRDM16	NM_022114.3	c.1882G>A	p.(Asp628Asn)	3		HCM	999	3	2	rs199895459	58/265194=0	6/23830=0	0/33156=0	0/8916=0	1/18576=0	1/24976=0	48/121022=0	2/28620=0	0/6098=0	2	1	1	deleterious	0.02	possibly_damaging	0.549	23	26.6
1454	CM	PRDM16	NM_022114.3	c.1882G>A	p.(Asp628Asn)	3		DCM	1182	2	1	rs199895459	58/265194=0	6/23830=0	0/33156=0	0/8916=0	1/18576=0	1/24976=0	48/121022=0	2/28620=0	0/6098=0	2	1	1	deleterious	0.02	possibly_damaging	0.549	23	26.6
1455	CM	PRDM16	NM_022114.3	c.1954G>A	p.(Gly652Ser)	3		HCM	1183	1	1	rs376706452	6/234498=0	3/22862=0	0/27724=0	0/6506=0	1/17314=0	0/22764=0	2/110552=0	0/21514=0	0/5262=0	0	0	-1	tolerated	0.58	benign	0	56	12.26
1456	CM	PRDM16	NM_022114.3	c.197C>T	p.(Ser66Leu)	3		UCM	1184	1	1	rs374012976	9/273678=0	1/23876=0	1/34276=0	0/9982=0	0/18790=0	0/25672=0	7/124068=0	0/30620=0	0/6394=0	-3	-2	-3	tolerated	0.13	probably_damaging	0.992	145	24.4
1457	CM	PRDM16	NM_022114.3	c.2035G>A	p.(Asp679Asn)	3		HCM	1069	3	3	rs772689095	32/244910=0	0/15228=0	0/33560=0	0/9818=0	1/17228=0	1/21714=0	2/111156=0	28/30752=0.001	0/5454=0	2	1	1	tolerated	0.15	benign	0.078	23	19.67
1458	CM	PRDM16	NM_022114.3	c.2065G>A	p.(Ala689Thr)	3		HCM	1185	4	1	rs750573716	2/276434=0	1/23980=0	0/34402=0	0/10144=0	0/18862=0	0/25368=0	1/126456=0	0/30778=0	0/6444=0	0	0	0	tolerated	0.32	benign	0.003	58	12.49
1459	CM	PRDM16	NM_022114.3	c.2089G>A	p.(Ala697Thr)	3		HCM	1186	2	1	rs779334537	1/245708=0	0/15276=0	0/33572=0	0/9846=0	0/17244=0	0/21944=0	1/111576=0	0/30780=0	0/5470=0	0	0	0	deleterious	0	possibly_damaging	0.551	58	26.3
1460	CM	PRDM16	NM_022114.3	c.2146C>G	p.(Leu716Val)	3		HCM	998	4	2	rs530296389	11/276416=0	0/23988=0	0/34416=0	0/10152=0	11/18866=0.001	0/25452=0	0/126306=0	0/30782=0	0/6454=0	1	1	1	tolerated	0.81	benign	0.079	32	15.93
1461	CM	PRDM16	NM_022114.3	c.2187C>G	p.(Phe729Leu)	3		ARVC	1564	1	1	rs200109766	104/275842=0	0/23996=0	16/34414=0	0/10148=0	0/18868=0	21/25120=0.001	61/126072=0	1/30782=0	5/6442=0.001	1	0	0	tolerated	0.16	benign	0	22	17.12
1462	CM	PRDM16	NM_022114.3	c.2297G>A	p.(Gly766Asp)	3		DCM	1187	1	1	rs778681326										-1	-1	-2	tolerated	0.05	probably_damaging	0.996	94	23.3
1463	CM	PRDM16	NM_022114.3.	c.2391C>A	p.(=)	3		HCM	1185	4	2	rs370931714	40/255616=0	0/21678=0	0/33806=0	0/9674=0	0/18254=0	0/21130=0	0/114734=0	38/30330=0.001	2/6010=0				NA	NA	NA	NA	NA	2839
1464	CM	PRDM16	NM_022114.3	c.2449G>A	p.(Gly817Ser)	3		HCM	1188	2	1	rs375308440	53/194152=0	40/18172=0.002	10/24604=0	0/6936=0	0/13542=0	0/17422=0	0/86070=0	3/22676=0	0/4730=0	0	0	-1	tolerated	0.17	probably_damaging	0.999	56	24.3
1465	CM	PRDM16	NM_022114.3	c.2449G>A	p.(Gly817Ser)	3		HCM	1189	1	1	rs375308440	53/194152=0	40/18172=0.002	10/24604=0	0/6936=0	0/13542=0	0/17422=0	0/86070=0	3/22676=0	0/4730=0	0	0	-1	tolerated	0.17	probably_damaging	0.999	56	24.3
1466	CM	PRDM16	NM_022114.3	c.2452G>A	p.(Gly818Ser)	3		DCM	447	2	2	rs201904226	376/192754=0.002	5/18028=0	30/24828=0.001	21/6980=0.003	0/13478=0	16/17060=0.001	236/85060=0.003	54/22590=0.002	14/4730=0.003	0	0	-1	tolerated	0.45		benign	0.049	56
1467	CM	PRDM16	NM_022114.3	c.2452G>A	p.(Gly818Ser)	3		UCM	693	1	1	rs201904226	376/192754=0.002	5/18028=0	30/24828=0.001	21/6980=0.003	0/13478=0	16/17060=0.001	236/85060=0.003	54/22590=0.002	14/4730=0.003	0	0	-1	tolerated	0.45		benign	0.049	56
1468	CM	PRDM16	NM_022114.3	c.2526G>A	p.(=)	3		NCCM	1247	2	2														NA	NA	NA	NA	NA	8761
1469	CM	PRDM16	NM_022114.3	c.2671C>T	p.(Pro891Ser)	3		DCM	1190	1	1											-1	-1	-1	deleterious	0.02	possibly_damaging	0.532	74	23.7
1470	CM	PRDM16	NM_022114.3	c.2786C>A	p.(Pro929His)	3		HCM	1191	1	1	rs145632008	39/275946=0	31/23978=0.001	7/34378=0	0/10134=0	0/18850=0	0/25788=0	1/125602=0	0/30770=0	0/6446=0	-2	-2	-3	deleterious	0.03	possibly_damaging	0.72	77	26.2
1471	CM	PRDM16	NM_022114.3	c.2797C>T	p.(Arg933Trp)	3		UCM	1192	1	1	rs371460126	36/275400=0	4/23934=0	2/34376=0	27/10120=0.003	0/18832=0	0/25790=0	3/125150=0	0/30756=0	0/6442=0	-2	-3	-4	deleterious	0	probably_damaging	0.998	101	29.3
1472	CM	PRDM16	NM_022114.3	c.2855C>A	p.(Thr952Lys)	3		ARVC	1193	3	1	rs749180764	3/241438=0	0/14998=0	0/33432=0	0/9736=0	0/17132=0	0/22198=0	3/107906=0	0/30628=0	0/5408=0	-1	-1	-1	deleterious	0.03	possibly_damaging	0.794	78	26.9
1473	CM	PRDM16	NM_022114.3	c.2940-5T>G	p.?	3		HCM	1194	1	1		3/276352=0	0/23968=0	1/34398=0	0/10110=0	0/18864=0	0/25754=0	1/126042=0	1/30770=0	0/6446=0				NA	NA	NA	NA	NA	9133
1474	CM	PRDM16	NM_022114.3	c.2953G>A	p.(Asp985Asn)	3		UCM	1195	2	1	rs758565663	25/276912=0	2/23972=0	2/34408=0	0/10136=0	1/18868=0	2/25784=0	16/126512=0	2/30782=0	0/6450=0	2	1	1	deleterious	0.03	possibly_damaging	0.775	23	28.6
1475	CM	PRDM16	NM_022114.3	c.3211T>A	p.(Ser1071Thr)	3		HCM	998	4	3	rs561896892	11/277094=0	0/24002=0	0/34404=0	0/10146=0	11/18864=0.001	0/25794=0	0/126658=0	0/30774=0	0/6452=0	2	1	1	deleterious	0.05	benign	0.097	58	17.26
1476	CM	PRDM16	NM_022114.3	c.3281A>G	p.(Lys1094Arg)	3		HCM	1196	3	1	rs947863770	2/276660=0	0/23992=0	0/34360=0	0/10110=0	0/18858=0	0/25776=0	2/126406=0	0/30716=0	0/6442=0	3	2	2	tolerated	0.18	benign	0.395	26	16.25
1477	CM	PRDM16	NM_022114.3	c.3281A>G	p.(Lys1094Arg)	3		DCM	1582	1	1	rs947863770	2/276660=0	0/23992=0	0/34360=0	0/10110=0	0/18858=0	0/25776=0	2/126406=0	0/30716=0	0/6442=0	3	2	2	tolerated	0.18	benign	0.395	26	16.25
1478	CM	PRDM16	NM_022114.3	c.3301G>A	p.(Val1101Met)	3		HCM	419	3	2	rs201654872	791/274972=0.003	2/24004=0	6/34412=0	0/10134=0	2/18862=0	0/25788=0	4/124546=0	769/30778=0.025	8/6448=0.001	1	1	1	tolerated	0.14		benign	0.306	21
1479	CM	PRDM16	NM_022114.3	c.3307G>A	p.(Gly1103Ser)	3		DCM	855	3	2	rs780612473	13/275104=0	1/24014=0	0/34416=0	3/10140=0	2/18860=0	0/25786=0	5/124662=0	2/30782=0	0/6444=0	0	0	-1	tolerated	0.46	benign	0.005	56	6224
1480	CM	PRDM16	NM_022114.3	c.3366C>G	p.(Asp1122Glu)	3		DCM	1197	1	1	rs370195954										2	2	1	tolerated	1	benign	0	0	0.055
1481	CM	PRDM16	NM_022114.3	c.3406G>A	p.(Gly1136Arg)	3		HCM	1069	3	2	rs775245244	36/248996=0	0/21460=0	6/31414=0	0/9628=0	0/16682=0	0/23578=0	27/111754=0	0/28484=0	3/5996=0.001	-2	-2	-3	tolerated	0.11	possibly_damaging	0.537	125	23.9
1482	CM	PRDM16	NM_022114.3	c.3406G>A	p.(Gly1136Arg)	3		HCM	1093	2	2	rs775245244	36/248996=0	0/21460=0	6/31414=0	0/9628=0	0/16682=0	0/23578=0	27/111754=0	0/28484=0	3/5996=0.001	-2	-2	-3	tolerated	0.11	possibly_damaging	0.537	125	23.9
1483	CM	PRDM16	NM_022114.3	c.3472_3480del	p.(Asp1158_Glu1160del)	3		HCM	1014	2	2	rs778222386										#N/A	#N/A	#N/A	NA	NA	NA	NA	NA	16.18
1484	CM	PRDM16	NM_022114.3	c.353G>A	p.(Arg118Gln)	3		HCM	504	2	2	rs538278091	15/193682=0	0/13804=0	0/24824=0	0/5508=0	0/15434=0	0/19686=0	5/89468=0	9/20860=0	1/4098=0	1	1	1	tolerated	0.08		benign	0.003	43
1485	CM	PRDM16	NM_022114.3	c.398C>T	p.(Thr133Met)	3		HCM	1199	1	1	rs530119550	17/277140=0	1/24012=0	0/34418=0	0/10152=0	10/18870=0.001	0/25792=0	4/126656=0	1/30780=0	1/6460=0	-1	-1	-1	deleterious	0	benign	0.095	81	20.2
1486	CM	PRDM16	NM_022114.3	c.755C>T	p.(Thr252Met)	3		UCM	1201	1	1	rs770148632	2/245642=0	0/15224=0	1/33574=0	0/9832=0	0/17230=0	0/22300=0	1/111234=0	0/30780=0	0/5468=0	-1	-1	-1	deleterious	0.04	possibly_damaging	0.493	81	23.3
1487	both	PRKAG2	NM_016203.3	c.253C>T	p.(Pro85Ser)	3		UA	298	1	1	rs754570613	2/241390=0	0/14604=0	0/33442=0	0/9722=0	0/17152=0	0/21778=0	2/108592=0	0/30712=0	0/5388=0	-1	-1	-1	deleterious	0.01	benign	0.006	74	18.80
1488	both	PRKAG2	NM_016203.3	c.298G>A	p.(Gly100Ser)	3		(A)SCD	18	2	1	rs79474211	1873/276670=0.007	13/23956=0.001	38/34406=0.001	10/10142=0.001	597/18850=0.032	4/25674=0	108/126402=0.001	1069/30778=0.035	34/6462=0.005	0	0	-1	tolerated	0.6	possibly damaging	0.907	56	18.55
1489	both	PRKAG2	NM_016203.3	c.454C>T	p.(Arg152Cys)	3		UA	297	1	1	rs752783859	7/245948=0	0/15276=0	3/33568=0	0/9850=0	0/17236=0	0/22112=0	2/111646=0	2/30780=0	0/5480=0	-3	-3	-4	deleterious	0.04	benign	0.048	180	25.2
1490	both	PRKAG2	NM_016203.3	c.590C>T	p.(Pro197Leu)	3		UA	296	1	1	rs368637364	6/277228=0	0/24034=0	0/34418=0	0/10152=0	0/18870=0	5/25794=0	1/126710=0	0/30782=0	0/6468=0	-3	-3	-3	deleterious	0.05	possibly_damaging	0.702	98	23.6
1491	both	PRKAG2	NM_016203.3	c.905G>A	p.(Arg302Gln)	5		UCM	1208	1	1	rs121908987										1	1	1	deleterious	0.01	benign	0.349	43	23.9
1492	both	PRKAG2	NM_016203.3	c.905G>A	p.(Arg302Gln)	5		HCM	1209	3	1	rs121908987										1	1	1	deleterious	0.01	benign	0.349	43	23.9
1493	both	PRKAG2	NM_016203.3	c.1009C>A	p.(Gln337Lys)	3		HCM	428	4	2											1	1	1	tolerated	0.19		benign	0.017	53
1494	both	PRKAG2	NM_016203.3	c.1114G>A	p.(Asp372Asn)	3		UA	75	1	1	rs760826751	5/246122=0	0/15300=0	0/33578=0	0/9846=0	0/17248=0	0/22290=0	5/111600=0	0/30782=0	0/5478=0	2	1	1	tolerated	0.09	possibly damaging	0.462	23	24.4
1495	both	PRKAG2	NM_016203.3	c.1295C>T	p.(Thr432Met)	3		HCM	1202	2	1	rs760879406	2/246244=0	0/15304=0	0/33582=0	0/9850=0	0/17248=0	0/22300=0	2/111692=0	0/30782=0	0/5486=0	-1	-1	-1	deleterious	0	probably_damaging	0.989	81	25.1
1496	both	PRKAG2	NM_016203.3	c.1315A>G	p.(Ile439Val)	3		ARVC	488	2	2	rs370257703	3/246234=0	0/15304=0	0/33582=0	0/9850=0	0/17248=0	0/22298=0	3/111686=0	0/30782=0	0/5484=0	3	3	3	tolerated	0.77		benign	0.124	29
1497	both	PRKAG2	NM_016203.3	c.1475T>A	p.(Ile492Asn)	3		ARVC	807	5	2	rs186114650	8/246266=0	0/15304=0	1/33582=0	0/9850=0	0/17248=0	0/22300=0	6/111714=0	0/30782=0	1/5486=0	-2	-3	-4	deleterious	0.03	benign	0.127	149	25.3
1498	both	PRKAG2	NM_016203.3	c.235A>G	p.(Arg79Gly)	3		HCM	1008	3	2											-2	-2	-3	tolerated	0.1	benign	0.056	125	21.0
1499	both	PRKAG2	NM_016203.3	c.253C>T	p.(Pro85Ser)	3		HCM	468	2	2	rs754570613	2/241390=0	0/14604=0	0/33442=0	0/9722=0	0/17152=0	0/21778=0	2/108592=0	0/30712=0	0/5388=0	-1	-1	-1	tolerated	0.13		benign	0.006	74
1500	both	PRKAG2	NM_016203.3	c.253C>T	p.(Pro85Ser)	3		HCM	972	4	2	rs754570613	2/241390=0	0/14604=0	0/33442=0	0/9722=0	0/17152=0	0/21778=0	2/108592=0	0/30712=0	0/5388=0	-1	-1	-1	deleterious	0.01	benign	0.006	74	18.80
1501	both	PRKAG2	NM_016203.3	c.253C>T	p.(Pro85Ser)	3		DCM	1107	4	2	rs754570613	2/241390=0	0/14604=0	0/33442=0	0/9722=0	0/17152=0	0/21778=0	2/108592=0	0/30712=0	0/5388=0	-1	-1	-1	deleterious	0.01	benign	0.006	74	18.80
1502	both	PRKAG2	NM_016203.3	c.298G>A	p.(Gly100Ser)	3		UA	167	2	2	rs79474211	1873/276670=0.007	13/23956=0.001	38/34406=0.001	10/10142=0.001	597/18850=0.032	4/25674=0	108/126402=0.001	1069/30778=0.035	34/6462=0.005	0	0	-1	tolerated	0.18	benign	0.205	56	20.4
1503	both	PRKAG2	NM_016203.3	c.298G>A	p.(Gly100Ser)	3		UA	336	2	2	rs79474211	1873/276670=0.007	13/23956=0.001	38/34406=0.001	10/10142=0.001	597/18850=0.032	4/25674=0	108/126402=0.001	1069/30778=0.035	34/6462=0.005	0	0	-1	tolerated	0.18	benign	0.205	56	20.4
1504	both	PRKAG2	NM_016203.3	c.298G>A	p.(Gly100Ser)	3		HCM	509	2	1	rs79474211	1873/276670=0.007	13/23956=0.001	38/34406=0.001	10/10142=0.001	597/18850=0.032	4/25674=0	108/126402=0.001	1069/30778=0.035	34/6462=0.005	0	0	-1	tolerated	0.6		benign	0.205	56
1505	both	PRKAG2	NM_016203.3	c.298G>A	p.(Gly100Ser)	3		HCM	1023	3	2	rs79474211	1873/276670=0.007	13/23956=0.001	38/34406=0.001	10/10142=0.001	597/18850=0.032	4/25674=0	108/126402=0.001	1069/30778=0.035	34/6462=0.005	0	0	-1	tolerated	0.18	benign	0.205	56	20.4
1506	both	PRKAG2	NM_016203.3	c.298G>A	p.(Gly100Ser)	3		UCM	1203	3	1	rs79474211	1873/276670=0.007	13/23956=0.001	38/34406=0.001	10/10142=0.001	597/18850=0.032	4/25674=0	108/126402=0.001	1069/30778=0.035	34/6462=0.005	0	0	-1	tolerated	0.18	benign	0.205	56	20.4
1507	both	PRKAG2	NM_016203.3	c.298G>A	p.(Pro16915Ala)	3		UCM	1204	3	1	rs79474211	1873/276670=0.007	13/23956=0.001	38/34406=0.001	10/10142=0.001	597/18850=0.032	4/25674=0	108/126402=0.001	1069/30778=0.035	34/6462=0.005	0	0	-1	tolerated	0.18	benign	0.205	56	20.4
1508	both	PRKAG2	NM_016203.3	c.298G>A	p.(Ile24638Thr)	3		DCM	1205	3	1	rs79474211	1873/276670=0.007	13/23956=0.001	38/34406=0.001	10/10142=0.001	597/18850=0.032	4/25674=0	108/126402=0.001	1069/30778=0.035	34/6462=0.005	0	0	-1	tolerated	0.18	benign	0.205	56	20.4
1509	both	PRKAG2	NM_016203.3	c.298G>A	p.(Gly100Ser)	3		HCM	1206	3	1	rs79474211	1873/276670=0.007	13/23956=0.001	38/34406=0.001	10/10142=0.001	597/18850=0.032	4/25674=0	108/126402=0.001	1069/30778=0.035	34/6462=0.005	0	0	-1	tolerated	0.18	benign	0.205	56	20.4
1510	both	PRKAG2	NM_016203.3	c.298G>A p	p.(Gly100Ser)	3		UCM	859	3	2	rs79474211	1873/276670=0.007	13/23956=0.001	38/34406=0.001	10/10142=0.001	597/18850=0.032	4/25674=0	108/126402=0.001	1069/30778=0.035	34/6462=0.005	0	0	-1	tolerated	0.18	benign	0.205	56	20.4
1511	both	PRKAG2	NM_016203.3	c.395A>G	p.(Pro465Leu)	3		DCM	1180	2	2	rs779753891	2/246080=0	0/15290=0	0/33578=0	0/9850=0	0/17242=0	0/22162=0	2/111694=0	0/30780=0	0/5484=0	3	2	2	tolerated	0.53	benign	0.005	26	21.6
1512	both	PRKAG2	NM_016203.3	c.418C>T	p.(Pro140Ser)	3		HCM	1098	2	2	rs755782342	8/277042=0	0/24018=0	0/34418=0	0/10152=0	0/18866=0	0/25644=0	8/126698=0	0/30780=0	0/6466=0	-1	-1	-1	tolerated	0.19	benign	0.001	74	16.70
1513	both	PRKAG2	NM_016203.3	c.425C>T	p.(Thr142Ile)	3		HCM	1088	3	2	rs397517270	18/277048=0	0/24026=0	1/34416=0	2/10152=0	0/18866=0	0/25648=0	15/126694=0	0/30780=0	0/6466=0	-1	-1	-1	deleterious	0.01	probably_damaging	0.979	89	25.1
1514	both	PRKAG2	NM_016203.3	c.521C>T	p.(Thr174Met)	3		Other indication	1207	3	1	rs148056866	20/277242=0	19/24038=0.001	1/34420=0	0/10152=0	0/18868=0	0/25794=0	0/126720=0	0/30782=0	0/6468=0	-1	-1	-1	tolerated	0.13	benign	0.226	81	22.5
1515	both	PRKAG2	NM_016203.3	c.712G>A	p.(Ala238Thr)	3		HCM	429	3	1	rs200736454	28/192960=0	27/15802=0.002	0/23762=0	0/8286=0	0/10602=0	1/14654=0	0/91784=0	0/23680=0	0/4390=0	0	0	0	tolerated	0.58		benign	0.001	58
1516	AR	RANGRF	NM_016492.4	c.5A>G	p.(Glu2Gly)	3		UA	299	1	1	rs763301510	1/245174=0	0/15246=0	0/33552=0	0/9804=0	0/17234=0	0/22298=0	1/110814=0	0/30764=0	0/5462=0	-2	-2	-3	deleterious	0.02	probably_damaging	0.991	98	25.6
1517	AR	RANGRF	NM_016492.4	c.11C>G	p.(Thr4Arg)	3		BRS	109	3	2											-1	-1	-1	tolerated	0.17	benign	0.045	71	9010
1518	CM	RBM20	NM_001134363.2	c.1900C>T	p.(Arg634Trp)	5		DCM	416	3	1	rs796734066										-2	-3	-4	deleterious	0		probably damaging	1	101
1519	CM	RBM20	NM_001134363.1	c.1900C>T	p.(Arg634Trp)	5		DCM	563	1	1	rs796734066										-2	-3	-4	deleterious	0		probably damaging	1	101
1520	CM	RBM20	NM_001134363.1	c.1900C>T	p.(Gly46Asp)	5		UCM	1212	3	1	rs796734066										-2	-3	-4	deleterious	0	probably_damaging	1	101	22.6
1521	CM	RBM20	NM_001134363.1	c.1900C>T	p.(Arg634Trp)	5		DCM	1213	2	1	rs796734066										-2	-3	-4	deleterious	0	probably_damaging	1	101	22.6
1522	CM	RBM20	NM_001134363.1	c.1913C>T	p.(Pro638Leu)	5		DCM	1214	1	1	rs267607003										-3	-3	-3	deleterious	0	probably_damaging	0.999	98	24.8
1523	CM	RBM20	NM_001134363.1	c.1138C>T	p.(Arg380Trp)	3		ARVC	1210	3	1	rs540962668	12/180754=0	3/16412=0	5/24794=0	0/8528=0	2/11862=0	0/20196=0	1/71286=0	1/22818=0	0/4858=0	-2	-3	-4	deleterious	0.04	possibly_damaging	0.895	101	23.3
1524	CM	RBM20	NM_001134363.1	c.1175G>A	p.(Arg392Gln)	3		DCM	430	3	1	rs751788298	3/180128=0	0/16360=0	1/24794=0	0/8534=0	0/11860=0	0/20174=0	1/70742=0	1/22822=0	0/4842=0	1	1	1	deleterious	0.01		possibly damaging	0.805	43
1525	CM	RBM20	NM_001134363.1	c.1257G>C	p.(Lys419Asn)	3		DCM	696	1	1	rs570518490										0	0	0	deleterious	0		probably damaging	0.997	94
1526	CM	RBM20	NM_001134363.1	c.1360G>T	p.(Gly454Cys)29%mozaïcism	3		HCM	433	2	2	rs780583951	2/148502=0	0/7596=0	0/23952=0	0/8232=0	0/10240=0	0/15056=0	0/56788=0	2/22822=0	0/3816=0	-3	-3	-4	deleterious	0		benign	0.436	159
1527	CM	RBM20	NM_001134363.1	c.1494C>A	p.(Ser498Arg)	3		DCM	775	2	2	rs774916799	2/148588=0	0/7608=0	0/23936=0	0/8228=0	0/10240=0	0/15052=0	2/56966=0	0/22740=0	0/3818=0	-1	-1	-1	tolerated	0.47	benign	0.015	110	3861
1528	CM	RBM20	NM_001134363.1	c.1528-1G>C	p.?	3		HCM	1211	2	1	rs534513476													NA	NA	NA	NA	NA	26.1
1529	CM	RBM20	NM_001134363.2	c.1760T>A	p.(Leu587His)	3		UCM	1489	2	2											-2	-3	-3	deleterious	0	probably_damaging	1	99	29.3
1530	CM	RBM20	NM_001134363.2	c.1958C>T	p.(Thr653Ile)	3		HCM	697	1	1	rs727505310	36/180708=0	0/16050=0	0/24754=0	0/8486=0	0/11804=0	16/20046=0.001	20/71938=0	0/22806=0	0/4824=0	-1	-1	-1	deleterious	0		probably damaging	0.997	89
1531	CM	RBM20	NM_001134363.2	c.1962C>T	p.(Ser654=)	3		DCM	1554	1	1		2/149766=0	0/7320=0	0/23918=0	0/8182=0	0/10186=0	0/16538=0	2/56970=0	0/22810=0	0/3842=0				NA	NA	NA	NA	NA	9404
1532	CM	RBM20	NM_001134363.2	c.2014G>A	p.(Gly672Ser)	3		DCM	894	2	2	rs730880182	10/180944=0	1/16238=0	0/24772=0	0/8526=0	0/11838=0	0/19642=0	9/72288=0	0/22820=0	0/4820=0	0	0	-1	tolerated	0.07	benign	0.229	56	15.73
1533	CM	RBM20	NM_001134363.2	c.2014G>A	p.(Gly672Ser)	3		ARVC	1215	3	1	rs730880182	10/180944=0	1/16238=0	0/24772=0	0/8526=0	0/11838=0	0/19642=0	9/72288=0	0/22820=0	0/4820=0	0	0	-1	tolerated	0.07	benign	0.229	56	15.73
1534	CM	RBM20	NM_001134363.2	c.2042A>G	p.(Tyr681Cys)	3		DCM	1515	3	3	rs372048968	22/180914=0	0/16306=0	0/24784=0	0/8530=0	0/11850=0	0/19430=0	21/72374=0	0/22822=0	1/4818=0	-3	-2	-3	deleterious	0	probably_damaging	0.947	194	22.4
1535	CM	RBM20	NM_001134363.2	c.2042A>G	p.(Tyr681Cys)	3		ARVC	1557	2	1	rs372048968	22/180914=0	0/16306=0	0/24784=0	0/8530=0	0/11850=0	0/19430=0	21/72374=0	0/22822=0	1/4818=0	-3	-2	-3	deleterious	0	probably_damaging	0.947	194	22.4
1536	CM	RBM20	NM_001134363.2	c.2147G>A	p.(Arg716Gln)	3		HCM	1001	2	2	rs375798246	23/180718=0	1/16336=0	0/24788=0	0/8536=0	0/11862=0	1/19170=0	13/72380=0	8/22818=0	0/4828=0	1	1	1	deleterious	0.02	benign	0.255	43	25.8
1537	CM	RBM20	NM_001134363.2	c.2147G>A	p.(Arg716Gln)	3		DCM	1216	2	1	rs375798246	23/180718=0	1/16336=0	0/24788=0	0/8536=0	0/11862=0	1/19170=0	13/72380=0	8/22818=0	0/4828=0	1	1	1	deleterious	0.02	benign	0.255	43	25.8
1538	CM	RBM20	NM_001134363.1	c.2147G>A	p.(Arg716Gln)	3		DCM	1217	1	1	rs375798246	23/180718=0	1/16336=0	0/24788=0	0/8536=0	0/11862=0	1/19170=0	13/72380=0	8/22818=0	0/4828=0	1	1	1	deleterious	0.02	benign	0.255	43	25.8
1539	CM	RBM20	NM_001134363.1	c.2147G>A	p.(Arg716Gln)	3		DCM	1478	2	2	rs375798246	23/180718=0	1/16336=0	0/24788=0	0/8536=0	0/11862=0	1/19170=0	13/72380=0	8/22818=0	0/4828=0	1	1	1	deleterious	0.02	benign	0.255	43	25.8
1540	CM	RBM20	NM_001134363.2	c.2183_2185del	p.(Glu728del)	3		UCM	837	3	3		2/150602=0	0/7614=0	0/23948=0	0/8232=0	0/10236=0	0/16202=0	2/57690=0	0/22820=0	0/3860=0				NA	NA	NA	NA	NA	16.01
1541	CM	RBM20	NM_001134363.1	c.2183A>G	p.(Glu728Gly)	3		DCM	1218	2	1	rs876657977	1/150644=0	0/7610=0	0/23950=0	0/8232=0	0/10236=0	0/16220=0	1/57714=0	0/22818=0	0/3864=0	-2	-2	-3	tolerated	0.19	benign	0.038	98	20.8
1542	CM	RBM20	NM_001134363.1	c.224C>T	p.(Ser75Leu)	3		HCM	1206	3	3	rs191342808	3/142860=0	0/7606=0	0/23560=0	0/7262=0	1/10222=0	0/15802=0	1/54050=0	1/20662=0	0/3696=0	-3	-2	-3	deleterious	0	possibly_damaging	0.713	145	27.7
1543	CM	RBM20	NM_001134363.2	c.2318A>G	p.(Lys773Arg)	3		HCM	508	2	2	rs181769913	187/182258=0.001	144/16334=0.009	24/24792=0.001	5/8534=0.001	0/11862=0	0/20160=0	7/72898=0	0/22822=0	7/4856=0.001	3	2	2	tolerated	0.24		benign	0.07	26
1544	CM	RBM20	NM_001134363.2	c.2761A>T	p.(Ile921Phe)	3		NCCM	1219	1	1	rs397516608	4/151380=0	0/7616=0	0/23956=0	0/8236=0	0/10240=0	0/16670=0	4/57964=0	0/22822=0	0/3876=0	0	0	-1	deleterious	0	probably_damaging	0.997	21	28.4
1545	CM	RBM20	NM_001134363.2	c.2887A>G	p.(Lys963Glu)	3		UCM	811	2	2	rs371951525	62/183170=0	0/16520=0	1/24800=0	5/8550=0.001	0/11864=0	13/20250=0.001	42/73470=0.001	0/22822=0	1/4894=0	1	1	1	tolerated	0.46	benign	0	56	10.56
1546	CM	RBM20	NM_001134363.1	c.2887A>G	p.(Lys963Glu)	3		UCM	876	2	2	rs371951525	62/183170=0	0/16520=0	1/24800=0	5/8550=0.001	0/11864=0	13/20250=0.001	42/73470=0.001	0/22822=0	1/4894=0	1	1	1	tolerated	0.46	benign	0	56	10.56
1547	CM	RBM20	NM_001134363.2	c.2887A>G	p.(Lys963Glu)	3		DCM	946	3	2	rs371951525	62/183170=0	0/16520=0	1/24800=0	5/8550=0.001	0/11864=0	13/20250=0.001	42/73470=0.001	0/22822=0	1/4894=0	1	1	1	tolerated	0.46	benign	0	56	10.56
1548	CM	RBM20	NM_001134363.2	c.2989G>A	p.(Val997Met)	3		HCM	1577	1	1	rs372370653	6/182518=0	1/16444=0	0/24788=0	0/8526=0	0/11864=0	0/20174=0	5/73038=0	0/22816=0	0/4868=0	1	1	1	tolerated	0.14	benign	0.023	21	13.91
1549	CM	RBM20	NM_001134363.2	c.3115C>T	p.(Pro1039Ser)	3		DCM	1220	3	1	rs727503392	38/182526=0	0/16390=0	5/24792=0	0/8544=0	0/11862=0	3/20178=0	30/73076=0	0/22822=0	0/4862=0	-1	-1	-1	tolerated	0.77	benign	0.031	74	13.84
1550	CM	RBM20	NM_001134363.2	c.3115C>T	p.(Pro1039Ser)	3		NCCM	1579	1	1	rs727503392	38/182526=0	0/16390=0	5/24792=0	0/8544=0	0/11862=0	3/20178=0	30/73076=0	0/22822=0	0/4862=0	-1	-1	-1	tolerated	0.77	benign	0.031	74	13.84
1551	CM	RBM20	NM_001134363.1	c.3391C>T	p.(Pro1131Ser)	3		DCM	1238	3	2											-1	-1	-1	tolerated	0.1	possibly_damaging	0.738	74	24.2
1552	CM	RBM20	NM_001134363.1	c.349G>A	p.(Ala117Thr)	3		DCM	741	3	2	rs373480063	3/182236=0	2/16336=0	0/24790=0	0/8540=0	0/11858=0	0/20160=0	0/72880=0	1/22822=0	0/4850=0	0	0	0	deleterious	0	probably_damaging	0.969	58	27.2
1553	CM	RBM20	NM_001134363.1	c.3578A>C	p.(Tyr1193Ser)	3		HCM	1221	1	1	rs535839168										-2	-2	-2	deleterious	0	probably_damaging	0.968	144	26.0
1554	CM	RBM20	NM_001134363.2	c.3578A>G	p.(Tyr1193Cys)	3		HCM	507	2	2	rs535839168	4/145652=0	0/7594=0	0/23714=0	0/8224=0	0/10190=0	0/15042=0	4/54402=0	0/22724=0	0/3762=0	-3	-2	-3	deleterious	0		probably damaging	0.99	194
1555	CM	RBM20	NM_001134363.1	c.3578A>G	p.(Tyr1193Cys)	3		HCM	931	3	2	rs535839168	4/145652=0	0/7594=0	0/23714=0	0/8224=0	0/10190=0	0/15042=0	4/54402=0	0/22724=0	0/3762=0	-3	-2	-3	deleterious	0	probably_damaging	0.99	194	26.4
1556	CM	RBM20	NM_001134363.1	c.3584C>A	p.(Ser1195Tyr)	3		UCM	424	3	3	rs753102653	64/176614=0	0/16326=0	1/24576=0	6/8526=0.001	0/11810=0	3/18532=0	53/69378=0.001	0/22720=0	1/4746=0	-2	-2	-2	deleterious	0		probably damaging	0.987	144
1557	CM	RBM20	NM_001134363.1	c.3595G>A	p.(Glu1199Lys)	3		DCM	1222	1	1	rs777768807	8/176434=0	4/16312=0	1/24526=0	0/8524=0	1/11790=0	0/18532=0	1/69310=0	1/22702=0	0/4738=0	1	1	1	deleterious	0	benign	0.025	56	23.4
1558	CM	RBM20	NM_001134363.1	c.3595G>A	p.(Glu1199Lys)	3		DCM	1223	2	1	rs777768807	8/176434=0	4/16312=0	1/24526=0	0/8524=0	1/11790=0	0/18532=0	1/69310=0	1/22702=0	0/4738=0	1	1	1	deleterious	0	benign	0.025	56	23.4
1559	CM	RBM20	NM_001134363.1	c.415C>A	p.(His139Asn)	3		DCM	1224	3	1											1	1	0	tolerated	0.58	benign	0.027	68	18.68
1560	CM	RBM20	NM_00113436	c.468_470del	p.(Ala158del)	3		HCM	694	1	1	rs115379805										NA	NA	NA	NA	NA		NA	NA	NA
1561	CM	RBM20	NM_001134363.1	c.468_470del	p.(Ala158del)	3		UCM	1002	2	2	rs397516620	1/30952=0	0/8730=0	0/838=0	0/302=0	0/1622=0	0/3492=0	1/14986=0	0/0=0	0/982=0				NA	NA	NA	NA	NA	15.06
1562	CM	RBM20	NM_001134363.2	c.488G>A	p.(Arg163Gln)	3		DCM	946	3	3	rs794729139	4/152004=0	1/7724=0	0/23952=0	0/8254=0	1/10240=0	0/16744=0	1/58360=0	1/22820=0	0/3910=0	1	1	1	tolerated	0.1	benign	0.003	43	13.40
1563	CM	RBM20	NM_001134363.1	c.769A>G	p.(Thr257Ala)	3		DCM	474	2	2											0	0	0	tolerated	0.48		benign	0	58
1564	CM	RBM20	NM_001134363.2	c.773C>T	p.(Ser258Leu)	3		HCM	745	4	4	rs749285793	13/179558=0	13/16348=0.001	0/24790=0	0/8526=0	0/11862=0	0/18496=0	0/71912=0	0/22822=0	0/4802=0	-3	-2	-3	deleterious	0.03	benign	0.091	145	17.42
1565	CM	RBM20	NM_001134363.2	c.785C>G	p.(Thr262Ser)	3		HCM	419	3	3	rs758718732	47/148552=0	0/7614=0	0/23950=0	0/8228=0	0/10238=0	0/14974=0	1/56906=0	46/22822=0.002	0/3820=0	2	1	1	tolerated	0.3		benign	0.006	58
1566	CM	RBM20	NM_001134363.2	c.850G>A	p.(Gly284Arg)	3		HCM	980	2	2	rs201148126	56/179290=0	0/16332=0	1/24790=0	0/8532=0	0/11856=0	1/18254=0	53/71906=0.001	1/22820=0	0/4800=0	-2	-2	-3	tolerated	0.07	possibly_damaging	0.633	125	23.8
1567	CM	RBM20	NM_001134363.2	c.850G>A	p.(Gly284Arg)	3		ARVC	1225	1	1	rs201148126	56/179290=0	0/16332=0	1/24790=0	0/8532=0	0/11856=0	1/18254=0	53/71906=0.001	1/22820=0	0/4800=0	-2	-2	-3	tolerated	0.07	possibly_damaging	0.633	125	23.8
1568	CM	RBM20	NM_001134363.1	c.850G>A	p.(Gly284Arg)	3		HCM	1226	2	1	rs201148126	56/179290=0	0/16332=0	1/24790=0	0/8532=0	0/11856=0	1/18254=0	53/71906=0.001	1/22820=0	0/4800=0	-2	-2	-3	tolerated	0.07	possibly_damaging	0.633	125	23.8
1569	CM	RBM20	NM_001134363.2	c.850G>A	p.(Gly284Arg)	3		HCM	1227	1	1	rs201148126	56/179290=0	0/16332=0	1/24790=0	0/8532=0	0/11856=0	1/18254=0	53/71906=0.001	1/22820=0	0/4800=0	-2	-2	-3	tolerated	0.07	possibly_damaging	0.633	125	23.8
1570	CM	RBM20	NM_001134363.2	c.850G>A	p.(Gly284Arg)	3		HCM	1619	1	1	rs201148126	56/179290=0	0/16332=0	1/24790=0	0/8532=0	0/11856=0	1/18254=0	53/71906=0.001	1/22820=0	0/4800=0	-2	-2	-3	tolerated	0.07	possibly_damaging	0.633	125	23.8
1571	CM	RBM20	NM_001134363.1	c.929C>T	p.(Pro310Leu)	3		NCCM	695	1	1		1/149060=0	0/7606=0	0/23952=0	0/8232=0	0/10236=0	1/15482=0	0/56896=0	0/22822=0	0/3834=0	-3	-3	-3	deleterious	0		benign	0.036	98
1572	AR	RYR2	NM_001035.2	c.12441G>T	p.(Arg4147Ser)	5		UA	329	1	1											-1	-1	-1	deleterious	0	probably_damaging	0.997	110	24.3
1573	AR	RYR2	NM_001035.2	c.1006-3T>G	p.(Glu336_Lys390del)	4		UA	339	1	1														NA	NA	NA	NA	NA	11.43
1574	AR	RYR2	NM_001035.2	c.11627A>T	p.(Asp3876Val)	4		CPVT	328	1	1											-3	-3	-4	deleterious	0	probably_damaging	0.995	152	31
1575	AR	RYR2	NM_001035.2	c.12419G>C	p.(Gly4140Ala)	4		UA	7	2	1											0	0	0	deleterious	0	probably damaging	1	60	26.1	26.6
1576	AR	RYR2	NM_001035.2	c.12620C>T	p.(Ser4207Leu)	4		UA	346	1	1											-3	-2	-3	deleterious	0.01	probably_damaging	0.981	145	32
1577	AR	RYR2	NM_001035.2	c.1939C>T	p.(Arg647Cys)	4		UA	315	1	1	rs202040519	42/276460=0	1/23832=0	1/34366=0	0/10098=0	0/18860=0	9/25780=0	28/126458=0	1/30620=0	2/6446=0	-3	-3	-4	deleterious	0	probably_damaging	0.981	180	29.2
1578	AR	RYR2	NM_001035.2	c.365G>A	p.(Arg122His)	4		CPVT	5	2	1	rs727503396	1/170048=0	0/9828=0	0/25410=0	0/8578=0	1/12044=0	0/17914=0	0/68412=0	0/23630=0	0/4232=0	0	0	0	deleterious	0.02	probably damaging	1	29	34
1579	AR	RYR2	NM_001035.2	c.7202G>T	p.(Arg2401Leu)	4		UA	314	1	1	rs794728756										-2	-2	-3	deleterious	0	probably_damaging	0.998	102	31
1580	AR	RYR2	NM_001035.2	c.724G>C	p.(Asp242His)	4		UA	321	3	1											0	-1	-2	deleterious	0	probably_damaging	0.942	81	27.6
1581	AR	RYR2	NM_001035.2	c.8147A>T	p.(Lys2716Ile)	4		UA	6	2	2	rs749618476	6/130796=0	0/6324=0	0/17920=0	0/8020=0	0/8178=0	0/16440=0	6/52512=0	0/18172=0	0/3230=0	-3	-3	-3	deleterious	0.01	probably damaging	0.987	102	34	NA
1582	AR	RYR2	NM_001035.2	c.10681C>G	p.(Leu3561Val)	3		UA	335	1	1		3/276476=0	0/24002=0	0/34300=0	0/10142=0	0/18856=0	0/25506=0	3/126536=0	0/30692=0	0/6442=0	1	1	1	deleterious	0	benign	0.341	32	24.0
1583	AR	RYR2	NM_001035.2	c.1081T>C	p.(Cys361Arg)	3		UA	325	1	1											-3	-3	-4	deleterious	0	possibly_damaging	0.812	180	25.4
1584	AR	RYR2	NM_001035.2	c.11084T>C	p.(Met3695Thr)	3		NCCM	319	2	1											-1	-1	-1	deleterious	0.01	probably_damaging	0.989	81	27.4
1585	AR	RYR2	NM_001035.2	c.11140T>G	p.(Phe3714Val)	3		AF	333	1	1	rs794728771										0	-1	-1	deleterious	0	benign	0.17	50	24.6
1586	AR	RYR2	NM_001035.2	c.11746G>T	p.(Val3916Phe)	3		VF	330	1	1											0	-1	-1	deleterious	0.01	benign	0.409	50	25.1
1587	AR	RYR2	NM_001035.2	c.12365C>T	p.(Ala4122Val)	3		UA	316	1	1											0	0	0	deleterious	0	possibly_damaging	0.484	64	25.3
1588	AR	RYR2	NM_001035.2	c.1241G>A	p.(Arg414His)	3		UA	340	1	1	rs371121679	2/245918=0	0/15284=0	0/33524=0	0/9846=0	1/17226=0	0/22296=0	0/111492=0	1/30782=0	0/5468=0	0	0	0	tolerated	0.21	benign	0.019	29	20.7
1589	AR	RYR2	NM_001035.2	c.12520T>C	p.(Phe4174Leu)	3		CPVT	345	1	1											1	0	0	deleterious	0	possibly_damaging	0.622	22	27.3
1590	AR	RYR2	NM_001035.2	c.13187A>G	p.(His4396Arg)	3		UA	313	3	1		1/241274=0	0/14992=0	0/33206=0	0/9694=0	0/16844=0	0/22146=0	1/108736=0	0/30264=0	0/5392=0	0	0	0	tolerated	0.08	possibly_damaging	0.478	29	22.3
1591	AR	RYR2	NM_001035.2	c.13528G>A	p.(Ala4510Thr)	3		UA	14	2	2	rs397516510	2/195424=0	0/12410=0	1/27416=0	0/8966=0	0/14200=0	0/19308=0	1/82918=0	0/25570=0	0/4636=0	0	0	3	tolerated	0.18	probably damaging	0.999	58	28.0
1592	AR	RYR2	NM_001035.2	c.13600C>T	p.(Pro4534Ser)	3		UA	332	1	1	rs199624074	10/234230=0	0/14228=0	4/32420=0	1/9526=0	0/16488=0	0/21764=0	5/105548=0	0/29020=0	0/5236=0	-1	-1	-1	tolerated	0.57	benign	0.006	74	16.60
1593	AR	RYR2	NM_001035.2	c.1574C>G	p.(Ser525Cys)	3		CPVT	334	2	1	rs776188922	4/276584=0	2/24012=0	0/34336=0	0/10128=0	0/18852=0	0/25786=0	1/126252=0	0/30770=0	1/6448=0	-1	-1	-2	deleterious	0.05	benign	0.007	112	21.2
1594	AR	RYR2	NM_001035.2	c.1939C>T	p.(Arg647Cys)	3		UA	318	1	1	rs202040519	42/276460=0	1/23832=0	1/34366=0	0/10098=0	0/18860=0	9/25780=0	28/126458=0	1/30620=0	2/6446=0	-3	-3	-4	deleterious	0	probably_damaging	0.981	180	29.2
1595	AR	RYR2	NM_001035.2	c.1976T>G	p.(Ile659Ser)	3		UA	317	1	1	rs753013388	2/245772=0	0/15286=0	0/33576=0	0/9848=0	0/17248=0	0/22290=0	2/111274=0	0/30778=0	0/5472=0	-2	-2	-3	deleterious	0	probably_damaging	0.915	142	32
1596	AR	RYR2	NM_001035.2	c.2050C>A	p.(Pro684Thr)	3		UA	341	1	1	rs794728819										-1	-1	-2	tolerated	0.17	possibly_damaging	0.831	38	24.2
1597	AR	RYR2	NM_001035.2	c.3038G>A	p.(Arg1013Gln)	3		UA	344	1	1	rs149514924	132/277112=0	7/24014=0	5/34414=0	2/10146=0	0/18866=0	0/25788=0	115/126658=0.001	1/30768=0	2/6458=0	1	1	1	tolerated	0.43	possibly_damaging	0.874	43	24.8
1598	AR	RYR2	NM_001035.2	c.3038G>A	p.(Arg1013Gln)	3		UA	347	1	1	rs149514924	132/277112=0	7/24014=0	5/34414=0	2/10146=0	0/18866=0	0/25788=0	115/126658=0.001	1/30768=0	2/6458=0	1	1	1	tolerated	0.43	possibly_damaging	0.874	43	24.8
1599	AR	RYR2	NM_001035.2	c.3151C>T	p.(Arg1051Cys)	3		UA	311	2	1	rs533330664	20/205652=0	0/12272=0	1/28568=0	0/9100=0	0/14442=0	0/19988=0	2/89994=0	17/26404=0.001	0/4884=0	-3	-3	-4	tolerated	0.37	possibly_damaging	0.905	180	23.6
1600	AR	RYR2	NM_001035.2	c.3908G>A	p.(Arg1303His)	3		CPVT	5	2	2	rs766670579	1/245258=0	0/15284=0	0/33548=0	0/9780=0	0/17246=0	0/22222=0	1/110982=0	0/30728=0	0/5468=0	0	0	0	deleterious	0	possibly damaging	0.474	29	24.6
1601	AR	RYR2	NM_001035.2	c.4250_4251del	p.(Tyr1417*)	3		UA	327	1	1														NA	NA	NA	NA	NA	33
1602	AR	RYR2	NM_001035.2	c.4692G>A	p.(Met1564Ile)	3		UA	326	1	1	rs201675951	21/232704=0	0/14038=0	1/32096=0	0/9490=0	1/16340=0	1/21540=0	18/105010=0	0/28912=0	0/5278=0	2	1	1	deleterious	0	benign	0.164	10	24.7
1603	AR	RYR2	NM_001035.2	c.4692G>A	p.(Met1564Ile)	3		UA	342	2	1	rs201675951	21/232704=0	0/14038=0	1/32096=0	0/9490=0	1/16340=0	1/21540=0	18/105010=0	0/28912=0	0/5278=0	2	1	1	deleterious	0	benign	0.164	10	24.7
1604	AR	RYR2	NM_001035.2	c.4747C>T	p.(Pro1583Ser)	3		(A)SCD	19	3	1	rs200070226	27/273898=0	1/23640=0	13/34114=0	0/10070=0	0/18608=0	1/25598=0	11/125230=0	0/30240=0	1/6398=0	-1	-1	0	deleterious	0	probably damaging	1	74	32
1605	AR	RYR2	NM_001035.2	c.5591T>C	p.(Leu1864Pro)	3		UA	306	1	1		2/245294=0	0/15238=0	0/33548=0	0/9808=0	0/17220=0	0/22296=0	2/110954=0	0/30768=0	0/5462=0	-3	-3	-3	tolerated	0.27	benign	0.012	98	0.067
1606	AR	RYR2	NM_001035.2	c.6337G>A	p.(Val2113Met)	3		UA	331	2	1	rs186906598	110/277002=0	4/23994=0	5/34408=0	0/10136=0	0/18856=0	0/25794=0	100/126578=0.001	0/30780=0	1/6456=0	1	1	1	deleterious	0.04	benign	0.225	21	22.7
1607	AR	RYR2	NM_001035.2	c.6337G>A	p.(Val2113Met)	3		CPVT	343	1	1	rs186906598	110/277002=0	4/23994=0	5/34408=0	0/10136=0	0/18856=0	0/25794=0	100/126578=0.001	0/30780=0	1/6456=0	1	1	1	deleterious	0.04	benign	0.225	21	22.7
1608	AR	RYR2	NM_001035.2	c.6427A>G	p.(Ile2143Val)	3		UA	308	1	1											3	3	3	deleterious	0.03	probably_damaging	0.994	29	26.3
1609	AR	RYR2	NM_001035.2	c.6952A>G	p.(Asn2318Asp)	3		BRS	324	1	1		2/246090=0	0/15280=0	0/33560=0	0/9848=0	0/17248=0	0/22300=0	2/111610=0	0/30770=0	0/5474=0	2	1	1	deleterious	0.01	probably_damaging	0.984	23	25.6
1610	AR	RYR2	NM_001035.2	c.7619A>G	p.(His2540Arg)	3		UA	312	2	1	rs200105499	54/277206=0	50/24018=0.002	0/34418=0	0/10152=0	0/18870=0	0/25794=0	0/126710=0	4/30782=0	0/6462=0	0	0	0	deleterious	0.01	possibly_damaging	0.827	29	24.9
1611	AR	RYR2	NM_001035.2	c.8145G>T	p.(Glu2715Asp)	3		UA	337	2	1	rs200420897	22/161156=0	2/14978=0	3/18714=0	0/8314=0	0/9696=0	0/19822=0	15/67208=0	0/18236=0	2/4188=0	2	2	1	deleterious	0.05	possibly_damaging	0.904	0	25.5
1612	AR	RYR2	NM_001035.2	c.8147A>T	p.(Lys2716Ile)	3		UA	338	1	1	rs749618476	6/130796=0	0/6324=0	0/17920=0	0/8020=0	0/8178=0	0/16440=0	6/52512=0	0/18172=0	0/3230=0	-3	-3	-3	deleterious	0	probably_damaging	0.982	102	33
1613	AR	RYR2	NM_001035.2	c.836C>T	p.(Thr279Met)	3		UA	336	2	1	rs754312807	4/246006=0	0/15286=0	0/33570=0	0/9844=0	0/17226=0	0/22292=0	4/111538=0	0/30774=0	0/5476=0	-1	-1	-1	tolerated	0.21	probably_damaging	0.919	81	25.3
1614	AR	RYR2	NM_001035.2	c.892C>T	p.(Arg298Cys)	3		BRS	322	2	1	rs551099887	33/276872=0	21/24010=0.001	2/34398=0	0/10140=0	0/18864=0	0/25790=0	1/126442=0	7/30774=0	2/6454=0	-3	-3	-4	tolerated	0.09	probably_damaging	0.939	180	25.6
1615	AR	RYR2	NM_001035.2	c.9458C>T	p.(Ser3153Phe)	3		UA	348	1	1											-2	-2	-3	deleterious	0	possibly_damaging	0.641	155	25.6
1616	AR	RYR2	NM_001035.2	c.950T>C	p.(Met317Thr)	3		UA	310	2	1	rs367601258	8/276656=0	2/23996=0	0/34350=0	0/10136=0	0/18846=0	0/25788=0	6/126340=0	0/30756=0	0/6444=0	-1	-1	-1	tolerated	0.1	benign	0	81	22.4
1617	AR	RYR2	NM_001035.2	c.9571G>C	p.(Glu3191Gln)	3		UA	307	1	1		2/231528=0	0/14256=0	0/32046=0	0/9510=0	0/16470=0	0/21606=0	2/103792=0	0/28596=0	0/5252=0	2	2	2	tolerated	0.19	benign	0.216	29	22.9
1618	AR	RYR2	NM_001035.2	c.9571G>C	p.(Glu3191Gln)	3		LQTS	323	1	1		2/231528=0	0/14256=0	0/32046=0	0/9510=0	0/16470=0	0/21606=0	2/103792=0	0/28596=0	0/5252=0	2	2	2	tolerated	0.19	benign	0.216	29	22.9
1619	AR	RYR2	NM_001035.2	c.9974A>G	p.(Lys3325Arg)	3		BRS	309	3	1		1/244728=0	0/15202=0	0/33434=0	0/9822=0	0/17148=0	0/22246=0	0/110762=0	0/30672=0	1/5442=0	3	2	2	tolerated	0.41	benign	0.177	26	23.1
1620	AR	RYR2	NM_001035.2	c.1069G>A	p.(Gly357Ser)	5		UA	76	1	1											0	0	-1	deleterious	0.04	probably damaging	1	56	33
1621	AR	RYR2	NM_001035.2	c.1258C>T	p.(Arg420Trp)	5		CPVT	77	1	1	rs190140598	1/245928=0	0/15282=0	0/33522=0	0/9844=0	0/17232=0	1/22296=0	0/111502=0	0/30780=0	0/5470=0	-2	-3	-4	deleterious	0.01	probably damaging	1	101	34
1622	AR	RYR2	NM_001035.2	c.14608T>G	p.(Phe4870Val)	4		CPVT	301	3	1											0	-1	-1	deleterious	0	probably_damaging	0.954	50	33
1623	AR	RYR2	NM_001035.2	c.1939C>T	p.(Arg647Cys)	4		UA	78	1	1	rs202040519	42/276460=0	1/23832=0	1/34366=0	0/10098=0	0/18860=0	9/25780=0	28/126458=0	1/30620=0	2/6446=0	-3	-3	-4	deleterious	0.01	probably damaging	1	180	34
1624	AR	RYR2	NM_001035.2	c.7159G>A	p.(Ala2387Thr)	4		CPVT	305	1	1	rs794728753										0	0	0	deleterious	0.01	probably_damaging	0.986	58	28.4
1625	AR	RYR2	NM_001035.2	c.7454_7456del	p.(Leu2485del)	4		CPVT	300	1	1														NA	NA	NA	NA	NA	22.1
1626	AR	RYR2	NM_001035.2	c.11182C>A	p.(Gln3728Lys)	3		UA	302	3	1	rs764121632										1	1	1	deleterious	0.01	probably_damaging	0.991	53	27.8
1627	AR	RYR2	NM_001035.2	c.1144G>A	p.(Val382Met)	3		UA	79	1	1	rs370057029	19/269552=0	2/23622=0	2/32766=0	1/9834=0	0/18466=0	0/25594=0	12/123682=0	1/29342=0	1/6246=0	1	1	1	tolerated	0.05	probably damaging	0.995	21	25.1
1628	AR	RYR2	NM_001035.2	c.13528G>A	p.(Ala4510Thr) (homozygous)	3		CPVT	304	1	1	rs397516510	2/195424=0	0/12410=0	1/27416=0	0/8966=0	0/14200=0	0/19308=0	1/82918=0	0/25570=0	0/4636=0	0	0	0	tolerated	0.12	probably_damaging	0.994	58	25.4
1629	AR	RYR2	NM_001035.2	c.14387G>A	p.(Ser4796Asn)	3		UA	219	2	2											1	1	0	deleterious	0.03	benign	0.36	46	24.6	34
1630	AR	RYR2	NM_001035.2	c.1476+5G>A	p.?	3		UA	303	2	1	rs778668388	5/242862=0	0/15098=0	2/33130=0	0/9766=0	1/16928=0	0/22200=0	2/109846=0	0/30492=0	0/5402=0				NA	NA	NA	NA	NA	10.11
1631	AR	RYR2	NM_001035.2	c.1827+140_1961+426del	p.?	3		NCCM	319	2	2														NA	NA	NA	NA	NA	24.1
1632	AR	RYR2	NM_001035.2	c.1884C>G	p.(Asn628Lys)	3		UA	80	1	1	rs532165055										0	0	0	deleterious	0	benign	0.042	94	24.1
1633	AR	RYR2	NM_001035.2	c.3181G>A	p.(Gly1061Ser)	3		Other indication	81	1	1	rs747447414	2/168752=0	1/9646=0	0/23984=0	0/8294=0	0/11768=0	0/18106=0	1/69660=0	0/23094=0	0/4200=0	0	0	-1	deleterious	0	probably damaging	0.96	56	29.9
1634	AR	RYR2	NM_001035.2	c.3508G>A	p.(Glu1170Lys)	3		UA	401	3	3	rs772236215										1	1	1	deleterious	0	possibly_damaging	0.615	56	27.7
1635	AR	RYR2	NM_001035.2	c.4076T>C	p.(Asp668Ala)	3		BRS	109	3	3		4/245460=0	0/15284=0	0/33572=0	0/9838=0	0/17220=0	0/22296=0	4/110996=0	0/30782=0	0/5472=0	0	0	0	tolerated	0.81	benign	0	64	12.10	32
1636	AR	RYR2	NM_001035.2	c.4692G>A	p.(Met1564Ile)	3		UA	261	2	2	rs201675951	21/232704=0	0/14038=0	1/32096=0	0/9490=0	1/16340=0	1/21540=0	18/105010=0	0/28912=0	0/5278=0	2	1	1	deleterious	0	benign	0.164	10	24.7
1637	AR	RYR2	NM_001035.2	c.5318A>G	p.(Asn1773Ser)	3		UA	82	1	1											1	1	-1	tolerated	0.52	benign	0	46	0.026
1638	AR	RYR2	NM_001035.2	c.6203G>A	p.(Arg2068Gln)	3		UA	379	2	2	rs869025512	2/243504=0	0/15060=0	0/33262=0	0/9780=0	0/17098=0	0/22180=0	2/110150=0	0/30536=0	0/5438=0	1	1	1	tolerated	0.07	possibly_damaging	0.548	43	23.8
1639	AR	RYR2	NM_001035.2	c.6532G>A	p.(Val2178Ile)	3		BRS	83	1	1	rs794728821										3	3	0	tolerated	0.06	probably damaging	0.999	29	27.9
1640	AR	RYR2	NM_001035.2	c.7009G>A	p.(Gly2337Arg)	3		CPVT	396	2	2											-2	-2	-3	deleterious	0	probably_damaging	1	125	30
1641	AR	SCN10A	NM_006514.2	c.1157T>G	p.(Phe386Cys)	3		BRS	352	2	1	rs78555408	135/277120=0	0/24032=0	0/34418=0	0/10146=0	129/18868=0.007	0/25794=0	1/126612=0	5/30782=0	0/6468=0	-2	-2	-3	deleterious	0	probably_damaging	0.999	205	29.8
1642	AR	SCN10A	NM_006514.2	c.2521A>G	p.(Ile841Val)	3		BRS	350	1	1	rs762119038	3/246108=0	0/15304=0	0/33580=0	0/9844=0	0/17238=0	0/22298=0	3/111588=0	0/30774=0	0/5482=0	3	3	3	tolerated	0.15	benign	0.014	29	16.01
1643	AR	SCN10A	NM_006514.2	c.3803G>A	p.(Arg1268Gln)	3		LQTS	349	1	1	rs138832868	520/276818=0.002	13/23998=0.001	15/34406=0	6/10144=0.001	6/18836=0	76/25698=0.003	400/126506=0.003	1/30770=0	3/6460=0	1	1	1	deleterious	0.01	benign	0.047	43	26.7
1644	AR	SCN10A	NM_006514.2	c.3803G>A	p.(Arg1268Gln)	3		UA	351	1	1	rs138832868	520/276818=0.002	13/23998=0.001	15/34406=0	6/10144=0.001	6/18836=0	76/25698=0.003	400/126506=0.003	1/30770=0	3/6460=0	1	1	1	deleterious	0.01	benign	0.047	43	26.7
1645	AR	SCN10A	NM_006514.3	c.5290C>G	p.(Leu1764Val)	3		UA	353	1	1	rs765298863	1/245920=0	0/15302=0	0/33576=0	0/9836=0	0/17246=0	0/22300=0	1/111396=0	0/30782=0	0/5482=0	1	1	1	deleterious	0	probably_damaging	0.993	32	24.5
1646	AR	SCN10A	NM_006514.3	c.1816C>T	p.(Arg606Trp)	3		UA	209	2	2	rs763821142	1/245408=0	0/15302=0	0/33194=0	0/9848=0	0/17234=0	0/22292=0	1/111578=0	0/30504=0	0/5456=0	-2	-3	-4	deleterious	0.01	probably_damaging	0.957	101	23.0	9.346
1647	AR	SCN10A	NM_006514.2	c.3803G>A	p.(Arg1268Gln)	3		UA	154	2	2	rs138832868	520/276818=0.002	13/23998=0.001	15/34406=0	6/10144=0.001	6/18836=0	76/25698=0.003	400/126506=0.003	1/30770=0	3/6460=0	1	1	1	deleterious	0.01	benign	0.047	43	26.7
1648	AR	SCN10A	NM_006514.3	c.4567T>C	p.(Cys1523Arg)	3		UA	382	3	2	rs763221534	2/246026=0	0/15300=0	0/33576=0	0/9846=0	0/17246=0	0/22300=0	2/111504=0	0/30772=0	0/5482=0	-3	-3	-4	deleterious	0	probably_damaging	0.999	180	29.1
1649	AR	SCN1B	NM_199037.4	c.532G>C	p.(Gly178Arg)	3		CPVT	355	2	1											-2	-2	-3	deleterious	0	possibly_damaging	0.667	125	23.4
1650	AR	SCN1B	NM_199037.3	c.560G>A	p.(Arg187His)	3		(A)SCD	18	2	2	rs72558026	373/271814=0.001	3/23440=0	2/34158=0	0/10034=0	365/18686=0.02	0/24634=0	1/123840=0	1/30660=0	1/6362=0	0	0	0	deleterious	0	benign	0.001	29	23.0
1651	AR	SCN1B	NM_001037.4	c.103A>C	p.(Thr35Pro)	3		LQTS	354	1	1	rs758494184	1/246136=0	0/15302=0	0/33580=0	0/9850=0	0/17248=0	0/22220=0	1/111672=0	0/30782=0	0/5482=0	-1	-1	-2	tolerated	0.3	probably_damaging	0.961	38	22.0
1652	AR	SCN1B	NM_199037.3	c.577G>A	p.(Glu193Lys)	3		(A)SCD	84	1	1		1/232332=0	0/13860=0	0/32308=0	0/9556=0	0/16588=0	0/20670=0	1/103954=0	0/30168=0	0/5228=0	1	1	1	tolerated	1	benign	0.003	56	0.012
1653	AR	SCN1B	NM_199037.4	c.679G>A	p.(Gly227Arg)	3		UA	382	3	3											-2	-2	-3	deleterious	0	benign	0.003	125	12.93
1654	AR	SCN2B	NM_004588.4	c.404G>A	p.(Arg135His)	3		WPW	356	3	1	rs370514575	5/246068=0	0/15294=0	0/33574=0	0/9844=0	1/17248=0	0/22272=0	4/111590=0	0/30760=0	0/5486=0	0	0	0	tolerated	0.09	probably_damaging	0.999	29	26.1
1655	AR	SCN2B	NM_004588	c.86G>A	p.(Ser29Asn)	3		Other indication	86	1	1	rs760543488	6/277084=0	0/24028=0	0/34420=0	0/10148=0	2/18868=0	0/25792=0	4/126580=0	0/30782=0	0/6466=0	1	1	0	deleterious	0.04	benign	0.099	46	23.1
1656	AR	SCN2B	NM_004588.4	c.86G>A	p.(Ser29Asn)	3		UA	85	1	1	rs760543488	6/277084=0	0/24028=0	0/34420=0	0/10148=0	2/18868=0	0/25792=0	4/126580=0	0/30782=0	0/6466=0	1	1	0	deleterious	0.04	benign	0.099	46	23.1
1657	AR	SCN3B	NM_018400.3	c.328G>A	p.(Val110Ile)	3		BRS	87	1	1	rs147205617	82/277204=0	14/24028=0.001	1/34420=0	0/10150=0	46/18866=0.002	0/25792=0	4/126702=0	14/30782=0	3/6464=0	3	3	3	tolerated	0.13	probably damaging	0.999	29	27.6
1658	AR	SCN3B	NM_018400.3	c.583G>A	p.(Ala195Thr)	3		LQTS	357	1	1	rs375755770	28/277146=0	1/24026=0	0/34420=0	0/10150=0	5/18868=0	0/25756=0	21/126688=0	0/30774=0	1/6464=0	0	0	0	deleterious	0.01	possibly_damaging	0.476	58	26.8
1659	AR	SCN4B	NM_174934.3	c.194A>T	p.(His65Leu)	3		UA	359	1	1	rs112363898	61/277218=0	0/24024=0	6/34420=0	11/10152=0.001	0/18870=0	1/25790=0	42/126712=0	1/30782=0	0/6468=0	-2	-3	-3	tolerated	0.57	benign	0.026	99	7266
1660	AR	SCN4B	NM_174934.3	c.632C>G	p.(Thr211Arg)	3		UA	358	1	1	rs201454653	39/277182=0	1/24028=0	1/34420=0	0/10150=0	0/18868=0	0/25794=0	37/126676=0	0/30780=0	0/6466=0	-1	-1	-1	deleterious	0	probably_damaging	0.999	71	25.0
1661	AR	SCN4B	NM_174934.3	c.99G>A	p.(Val33Val)	3		UA	17	3	3											NA	NA	NA	NA	NA	NA	NA	NA	14.97
1662	AR	SCN4B	NM_174934.3	c.208T>C	p.(Tyr70His)	3		UA	360	1	1											2	2	2	tolerated	0.1	probably_damaging	0.913	83	23.9
1663	AR	SCN4B	NM_174934.3	c.35C>T	p.(Ala12Val)	3		UA	238	4	4											0	0	0	tolerated	0.13	benign	0.444	64	23.5	33
1664	AR	SCN4B	NM_174934.3	c.99G>A	p.(=)	3		UA	268	3	3														NA	NA	NA	NA	NA	15.54
1665	both	SCN5A	NM_198056.2	c.2582_2583del	p.(Phe861Trpfs*90)	5		BRS	363	1	1	rs794728914													NA	NA	NA	NA	NA	35
1666	both	SCN5A	NM_198056.2	c.2582_2583del	p.(Phe861Trpfs*90)	5		SSS	377	2	1	rs794728914													NA	NA	NA	NA	NA	35
1667	both	SCN5A	NM_198056.2	c.3956G>T	p.(Gly1319Val)	5		BRS	367	1	1	rs199473220	11/266334=0	2/22934=0	0/33422=0	0/9892=0	0/18340=0	0/24512=0	9/121862=0	0/29092=0	0/6280=0	-3	-3	-4	deleterious	0	probably_damaging	0.994	109	28.9
1668	both	SCN5A	NM_198056.2	c.3956G>T	p.(Gly1319Val)	5		UA	379	2	1	rs199473220	11/266334=0	2/22934=0	0/33422=0	0/9892=0	0/18340=0	0/24512=0	9/121862=0	0/29092=0	0/6280=0	-3	-3	-4	deleterious	0	probably_damaging	0.994	109	28.9
1669	both	SCN5A	NM_198056.2	c.4978A>G	p.(Ile1660Val)	5		BRS	376	3	1	rs199473625	9/277206=0	0/24018=0	0/34420=0	0/10152=0	0/18870=0	0/25792=0	8/126704=0	1/30782=0	0/6468=0	3	3	3	deleterious	0.01	benign	0.146	29	23.5
1670	both	SCN5A	NM_198056.2	c.629T>G	p.(Val210Gly)	5		AF	372	4	1											-3	-3	-4	NA	NA	NA	NA	NA	20.9
1671	both	SCN5A	NM_198056.2	c.673C>T	p.(Arg225Trp)	5		UA	378	1	1	rs199473072	7/270182=0	3/23290=0	2/33794=0	0/9988=0	0/18506=0	0/25404=0	1/123386=0	1/29464=0	0/6350=0	-2	-3	-4	NA	NA	NA	NA	NA	19.52
1672	both	SCN5A	NM_198056.2	c.795_808del	p.(Leu266Alafs*40)	5		UA	383	1	1	rs199473079													NA	NA	NA	NA	NA	35
1673	both	SCN5A	NM_198056.2	c.1597C>T	p.(Arg533Cys)	4		UA	366	1	1	rs775576991	5/275610=0	0/23822=0	2/34292=0	0/10088=0	0/18804=0	0/25708=0	2/125836=0	0/30628=0	1/6432=0	-3	-3	-4	deleterious	0	probably_damaging	0.967	180	32
1674	both	SCN5A	NM_198056.2	c.718G>A	p.(Val240Met)	4		UA	92	1	1	rs199473076	4/276716=0	1/24016=0	3/34420=0	0/10148=0	0/18870=0	0/25792=0	0/126230=0	0/30782=0	0/6458=0	1	1	1	deleterious	0	probably damaging	1	21	34
1675	both	SCN5A	NM_198056.2	c.784A>C	p.(Ser262Arg)	4		UA	364	1	1	rs777689378										-1	-1	-1	deleterious	0	benign	0.031	110	24.5
1676	both	SCN5A	NM_198056.2	c.1993G>T	p.(Ala665Ser)	3		UA	373	1	1	rs756474485	14/276636=0	0/23992=0	0/34416=0	0/10146=0	14/18862=0.001	0/25772=0	0/126220=0	0/30782=0	0/6446=0	1	1	1	tolerated	0.27	benign	0.414	99	20.9
1677	both	SCN5A	NM_198056.2	c.2179A>G	p.(Ile727Val)	3		UA	1	2	2											3	3	3	deleterious	0.02	benign	0.022	29	23.1
1678	both	SCN5A	NM_198056.2	c.2962C>T	p.(Arg988Trp)	3		CPVT	384	2	1	rs768691853	5/235760=0	0/14064=0	0/32820=0	0/9606=0	0/16738=0	1/21482=0	2/105558=0	2/30208=0	0/5284=0	-2	-3	-4	deleterious	0.02	benign	0.401	101	24.6
1679	both	SCN5A	NM_198056.2	c.3094G>A	p.(Glu1032Lys)	3		(A)SCD	19	3	2	rs369565476	14/276614=0	2/23992=0	0/34406=0	0/10138=0	2/18860=0	0/25770=0	10/126232=0	0/30770=0	0/6446=0	1	1	1	tolerated	0.84	benign	0	56	0.012
1680	both	SCN5A	NM_198056.2	c.3094G>A	p.(Glu1032Lys)	3		UA	374	1	1	rs369565476	14/276614=0	2/23992=0	0/34406=0	0/10138=0	2/18860=0	0/25770=0	10/126232=0	0/30770=0	0/6446=0	1	1	1	tolerated	0.49	benign	0	56	0.291
1681	both	SCN5A	NM_198056.2	c.3404G>T	p.(Ser1135Ile)	3		UA	375	1	1	rs557957405	10/267088=0	0/23000=0	0/33354=0	0/9892=0	0/18302=0	1/25240=0	8/122076=0	0/28940=0	1/6284=0	-2	-2	-3	deleterious	0.02	benign	0.079	142	23.2
1682	both	SCN5A	NM_198056.2	c.392+3del	p.(Gln534Arg)	3		UA	371	2	1														NA	NA	NA	NA	NA	16.80
1683	both	SCN5A	NM_198056.2	c.3953A>G	p.(Glu1318Gly)	3		BRS	368	3	1											-2	-2	-3	deleterious	0	possibly_damaging	0.842	98	29.8
1684	both	SCN5A	NM_198056.2	c.5261C>T	p.(Thr1754Ile)	3		UA	385	1	1											-1	-1	-1	deleterious	0	benign	0.264	89	24.1
1685	both	SCN5A	NM_198056.2	c.5336C>T	p.(Thr1779Met)	3		(A)SCD	19	3	3	rs199473634	12/277196=0	1/24014=0	1/34420=0	0/10152=0	0/18868=0	0/25792=0	7/126704=0	2/30782=0	1/6464=0	-1	-1	-1	deleterious	0	probably damaging	1	81	27.9
1686	both	SCN5A	NM_198056.2	c.6034C>T	p.(Arg2012Cys)	3		UA	381	1	1	rs199473640	8/184766=0	0/14572=0	4/24438=0	0/3964=0	0/15824=0	0/18282=0	3/87146=0	0/16734=0	1/3806=0	-3	-3	-4	deleterious	0	probably_damaging	0.925	180	28.1
1687	both	SCN5A	NM_198056.2	c.6034C>T	p.(Arg2012Cys)	3		UA	382	3	1	rs199473640	8/184766=0	0/14572=0	4/24438=0	0/3964=0	0/15824=0	0/18282=0	3/87146=0	0/16734=0	1/3806=0	-3	-3	-4	deleterious	0	probably_damaging	0.925	180	28.1
1688	both	SCN5A	NM_198056.2	c.647C>T	p.(Ser216Leu)	3		UA	380	1	1	rs41276525	178/271904=0.001	1/23444=0	20/33928=0.001	9/10016=0.001	1/18616=0	1/25514=0	123/124242=0.001	17/29770=0.001	6/6374=0.001	-3	-2	-3	NA	NA	NA	NA	NA	21.4
1689	both	SCN5A	NM_198056.2	c.2437-1G>T	p.?	5		DCM	447	2	1											NA	NA	NA	NA	NA		NA	NA	NA
1690	both	SCN5A	NM_198056.2	c.2582_2583del	p.(Phe861Trpfs*90)	5		BRS	89	1	1	rs794728914										NA	NA	NA	NA	NA	NA	NA	NA	NA
1691	both	SCN5A	NM_198056.2	c.2582_2583del	p.(Phe861Trpfs*90)	5		BRS	365	2	1	rs794728914													NA	NA	NA	NA	NA	35
1692	both	SCN5A	NM_198056.2	c.2582_2583del	p.(Phe861Trpfs*90)	5		DCM	1234	3	1	rs794728914													NA	NA	NA	NA	NA	35
1693	both	SCN5A	NM_198056.2	c.2893C>T	p.(Arg965Cys)	5		DCM	1538	4	3	rs199473180	16/243648=0	0/14996=0	1/33344=0	0/9802=0	10/17136=0.001	0/22154=0	1/110368=0	4/30430=0	0/5418=0	-3	-3	-4	deleterious	0	probably_damaging	0.982	180	27.2
1694	both	SCN5A	NM_198056.2	c.3157G>A	p.(Glu1053Lys)	5		HCM	448	2	1	rs137854617	28/276788=0	1/24010=0	9/34412=0	0/10144=0	0/18862=0	0/25788=0	16/126356=0	0/30768=0	2/6448=0	1	1	1	deleterious	0.02		possibly damaging	0.824	56
1695	both	SCN5A	NM_198056.2	c.3438del	p.(Asn1146Lysfs*69)	5		BRS	370	1	1														NA	NA	NA	NA	NA	32
1696	both	SCN5A	NM_198056.2	c.3911C>T	p.(Thr1304Met)	5		HCM	449	2	1	rs199473603	42/275748=0	2/23906=0	3/34312=0	0/10120=0	0/18826=0	0/25500=0	35/126116=0	2/30522=0	0/6446=0	-1	-1	-1	deleterious	0		probably damaging	0.999	81
1697	both	SCN5A	NM_198056.2	c.3956G>T	p.(Gly1319Val)	5		BRS	362	1	1	rs199473220	11/266334=0	2/22934=0	0/33422=0	0/9892=0	0/18340=0	0/24512=0	9/121862=0	0/29092=0	0/6280=0	-3	-3	-4	deleterious	0	probably_damaging	0.994	109	28.9
1698	both	SCN5A	NM_198056.2	c.3956G>T	p.(Gly1319Val)	5		HCM	564	1	1	rs199473220	11/266334=0	2/22934=0	0/33422=0	0/9892=0	0/18340=0	0/24512=0	9/121862=0	0/29092=0	0/6280=0	-3	-3	-4	deleterious	0		probably damaging	1	109
1699	both	SCN5A	NM_198056.2	c.481G>A	p.(Glu161Lys)	5		BRS	88	1	1	rs199473062	2/238288=0	0/14594=0	0/32736=0	0/9670=0	0/16846=0	0/21764=0	1/108194=0	1/29114=0	0/5370=0	1	1	1	deleterious	0.02	probably damaging	0.999	56	35
1700	both	SCN5A	NM_198056.2	c.4975A>G	p.(Asn1659Asp)	5		DCM	1228	1	1	rs201832649										2	1	1	deleterious	0.01	benign	0.394	23	24.4
1701	both	SCN5A	NM_198056.2	c.4975A>G	p.(Asn1659Asp)	5		DCM	1245	3	1	rs201832649										2	1	1	deleterious	0.01	benign	0.394	23	24.4
1702	both	SCN5A	NM_001099404.1	c.5228G>A	p.(Gly1743Glu)	5		UCM	565	1	1	rs199473629										-2	-2	-3	deleterious	0		probably damaging	1	98
1703	both	SCN5A	NM_198056.2	c.5228G>A	p.(Gly1743Glu)	5		DCM	1246	1	1	rs199473629										-2	-2	-3	deleterious	0	probably_damaging	1	98	28.0
1704	both	SCN5A	NM_198056.2	c.5287G>A	p.(Val1763Met)	5		NCCM	1247	2	1	rs199473631										1	1	1	deleterious	0	possibly_damaging	0.637	21	27.8
1705	both	SCN5A	NM_198056.2	c.795_808del	p.(Leu266Alafs*40)	5		UCM	1252	2	1	rs199473079													NA	NA	NA	NA	NA	35
1706	both	SCN5A	NM_198056.2	c.934+1G>A	p.?	5		HCM	1255	1	1														NA	NA	NA	NA	NA	29.3
1707	both	SCN5A	NM_198056.2	c.2420T>C	p.(Leu807Pro)	4		UA	91	1	1											-3	-3	-3	deleterious	0	probably damaging	0.999	98	32
1708	both	SCN5A	NM_198056.2	c.4748G>A	p.(Arg1583His)	4		HCM	1243	1	1	rs199473621	5/277052=0	0/24000=0	2/34416=0	0/10148=0	1/18868=0	0/25784=0	2/126596=0	0/30782=0	0/6458=0	0	0	0	deleterious	0.01	possibly_damaging	0.783	29	28.4
1709	both	SCN5A	NM_198056.2	c.4859C>T	p.(Thr1620Met)	4		DCM	602	1	1	rs199473282	1/246138=0	0/15304=0	0/33580=0	0/9848=0	0/17248=0	0/22288=0	1/111606=0	0/30782=0	0/5482=0	-1	-1	-1	deleterious	0		probably damaging	0.911	81
1710	both	SCN5A	NM_198056.2	c.5692C>T	p.(Arg1898Cys)	4	3 (frequency in control databases)	NCCM	603	1	1	rs373118001	11/277222=0	1/24028=0	0/34420=0	0/10152=0	1/18870=0	0/25792=0	8/126718=0	0/30782=0	1/6460=0	-3	-3	-4	deleterious	0.01		possibly damaging	0.612	180
1711	both	SCN5A	NM_198056.2	c.5711C>T	p.(Ser1904Leu)	4		NCCM	604	1	1	rs150264233	49/277216=0	43/24030=0.002	2/34420=0	1/10152=0	0/18870=0	0/25792=0	3/126710=0	0/30782=0	0/6460=0	-3	-2	-3	deleterious	0.01		probably damaging	0.985	145
1712	both	SCN5A	NM_001099404.1	c.6046G>A	p.(Val2016Met)	4		DCM	1249	3	1	rs762981322	8/210128=0	3/23138=0	0/23572=0	0/3924=0	0/17088=0	0/21458=0	1/100660=0	4/15672=0	0/4616=0	1	1	1	deleterious	0	probably_damaging	0.994	21	24.2
1713	both	SCN5A	NM_198056.2	c.718G>A	p.(Val240Met)	4		BRS	90	1	1	rs199473076	4/276716=0	1/24016=0	3/34420=0	0/10148=0	0/18870=0	0/25792=0	0/126230=0	0/30782=0	0/6458=0	1	1	1	deleterious	0	probably damaging	1	21	34
1714	both	SCN5A	NM_198056.2	c.-27_-15del	p.?	3		NCCM	698	1	1											NA	NA	NA	NA	NA		NA	NA	NA
1715	both	SCN5A	NM_198056.2	c.1045G>A	p.(Asp349Asn)	3		DCM	1229	2	1	rs779687673	4/276918=0	0/24014=0	3/34414=0	0/10148=0	0/18868=0	0/25638=0	1/126598=0	0/30778=0	0/6460=0	2	1	1	tolerated	0.99	possibly_damaging	0.895	23	22.7
1716	both	SCN5A	NM_198056.2	c.1126C>T	p.(Arg376Cys)	3		UA	135	2	2	rs199473100										-3	-3	-4	deleterious	0	probably_damaging	0.931	180	32
1717	both	SCN5A	NM_198056.2	c.154C>T	p.(Pro52Ser)	3		ARVC	1230	1	1	rs199473553	3/275540=0	0/23862=0	0/34336=0	0/10118=0	0/18786=0	0/25670=0	3/125644=0	0/30688=0	0/6436=0	-1	-1	-1	deleterious	0.05	benign	0.09	74	23.5
1718	both	SCN5A	NM_198056.2	c.1714_1715delinsTT	p.(Ala572Phe)	3		HCM	471	2	2	rs36210423										-2	-2	-4	deleterious	0.04		possibly damaging	0.557	113
1719	both	SCN5A	NM_198056.2	c.1714_1715delinsTT	p.(Ala572Phe)	3		DCM	700	1	1	rs36210423										-2	-2	-4	deleterious	0.04		possibly damaging	0.557	113
1720	both	SCN5A	NM_198056.2	c.1714_1715delinsTT	p.(Ala572Phe)	3		HCM	1188	2	2	rs36210423													tolerated	0.68	benign	0.104	113	17.03
1721	both	SCN5A	NM_198056.2	c.1735G>A	p.(Gly579Arg)	3		DCM	794	4	2	rs199473128	23/276526=0	1/23994=0	0/34416=0	0/10140=0	0/18860=0	1/25766=0	12/126122=0	9/30780=0	0/6448=0	-2	-2	-3	tolerated	0.45	benign	0.42	125	13.06
1722	both	SCN5A	NM_198056.2	c.1756G>A	p.(Ala586Thr)	3		HCM	979	2	2	rs199473129	4/245210=0	1/15274=0	0/33572=0	0/9808=0	1/17238=0	0/22210=0	2/110910=0	0/30736=0	0/5462=0	0	0	0	tolerated	0.8	benign	0.023	58	14.82
1723	both	SCN5A	NM_198056.2	c.1820G>T	p.(Gly607Val)	3		WPW	356	3	2	rs757119370	13/215798=0	0/14910=0	2/29258=0	0/6754=0	0/16694=0	0/20430=0	11/99992=0	0/23082=0	0/4678=0	-3	-3	-4	deleterious	0.05	benign	0.17	109	23.2
1724	both	SCN5A	NM_198056.2	c.1844G>A	p.(Gly615Glu)	3		DCM	1231	5	1	rs12720452	60/224294=0	4/23418=0	3/26652=0	0/5148=0	0/17726=0	0/22270=0	50/106156=0	1/17874=0	2/5050=0	-2	-2	-3	tolerated	0.74	benign	0.007	98	16.73
1725	both	SCN5A	NM_198056.2	c.1889C>T	p.(Thr630Met)	3		BRS	368	3	2	rs777061524	15/203762=0	3/22836=0	0/21780=0	0/3604=0	0/16652=0	0/20980=0	11/98808=0	1/14642=0	0/4460=0	-1	-1	-1	tolerated	0.13	possibly_damaging	0.906	81	24.9
1726	both	SCN5A	NM_198056.2	c.1960G>A	p.(Glu654Lys)	3		DCM	821	2	2	rs199473138	7/245556=0	0/15246=0	4/33576=0	0/9840=0	1/17234=0	0/22282=0	1/111132=0	1/30780=0	0/5466=0	1	1	1	tolerated	0.11	benign	0.148	56	23.2
1727	both	SCN5A	NM_198056.2	c.1984G>T	p.(Ala662Ser)	3		NCCM	501	2	2	rs371313714	7/276574=0	7/23978=0	0/34412=0	0/10146=0	0/18868=0	0/25768=0	0/126168=0	0/30782=0	0/6452=0	1	1	1	tolerated	0.09		benign	0.185	99
1728	both	SCN5A	NM_198056.2	c.2065C>T	p.(Arg689Cys)	3		UCM	701	1	1	rs199473580	4/245634=0	0/15292=0	1/33570=0	0/9824=0	0/17248=0	0/22278=0	1/111180=0	2/30766=0	0/5476=0	-3	-3	-4	deleterious	0		benign	0.328	180
1729	both	SCN5A	NM_198056.2	c.2066G>A	p.(Arg689His)	3		DCM	1232	1	1	rs199473145	25/245708=0	5/15294=0	3/33574=0	0/9814=0	2/17248=0	0/22274=0	4/111266=0	11/30762=0	0/5476=0	0	0	0	tolerated	0.18	benign	0.001	29	17.19
1730	both	SCN5A	NM_198056.2	c.210T>G	p.(Asn70Lys)	3		UA	93	1	1	rs199473050	11/244528=0	1/15272=0	3/33524=0	0/9798=0	0/17228=0	0/22222=0	7/110366=0	0/30658=0	0/5460=0	0	0	0	deleterious	0	probably damaging	0.985	94	24.5
1731	both	SCN5A	NM_001099404.1	c.2114C>T	p.(Ser705Phe)	3		HCM	465	2	2	rs199473148	12/277216=0	0/24028=0	0/34420=0	0/10152=0	11/18868=0.001	0/25794=0	0/126712=0	0/30782=0	1/6460=0	-2	-2	-3	tolerated	0.06		benign	0.154	155
1732	both	SCN5A	NM_198056.2	c.2387T>C	p.(Leu796Pro)	3		HCM	1003	2	2											-3	-3	-3	deleterious	0	benign	0.003	98	24.5
1733	both	SCN5A	NM_198056.2	c.2412_2429del	p.(Leu804_Ser809del)	3		UA	386	1	1														NA	NA	NA	NA	NA	22.1
1734	both	SCN5A	NM_198056.2	c.2441G>A	p.(Arg814Gln)	3		NCCM	1233	1	1	rs199473584	7/274514=0	0/23966=0	1/34370=0	0/10100=0	1/18854=0	0/25726=0	4/124370=0	1/30696=0	0/6432=0	1	1	1	deleterious	0	possibly_damaging	0.801	43	29.7
1735	both	SCN5A	NM_198056.2	c.2614G>A	p.(Asp872Asn)	3		HCM	1235	3	1	rs763396298	4/246264=0	0/15304=0	0/33582=0	0/9850=0	0/17248=0	0/22300=0	4/111714=0	0/30780=0	0/5486=0	2	1	1	tolerated	0.47	probably_damaging	0.919	23	22.8
1736	both	SCN5A	NM_198056.2	c.2924G>A	p.(Arg975Gln)	3		ARVC	1236	1	1	rs753149586	10/270136=0	1/23278=0	1/33804=0	0/10032=0	0/18486=0	0/25366=0	6/122652=0	2/30180=0	0/6338=0	1	1	1	tolerated	0.29	probably_damaging	0.99	43	24.4
1737	both	SCN5A	NM_001099404.1	c.2962C>T	p.(Arg988Trp)	3		HCM	460	2	2	rs768691853	5/235760=0	0/14064=0	0/32820=0	0/9606=0	0/16738=0	1/21482=0	2/105558=0	2/30208=0	0/5284=0	-2	-3	-4	deleterious	0.04		possibly damaging	0.536	101
1738	both	SCN5A	NM_198056.2	c.3010T>C	p.(Cys1004Arg)	3		DCM	1046	7	3	rs199473183	70/239706=0	0/14462=0	0/33360=0	0/9676=0	0/17064=0	0/21570=0	0/107682=0	70/30526=0.002	0/5366=0	-3	-3	-4	tolerated	0.14	possibly_damaging	0.719	180	24.0
1739	both	SCN5A	NM_198056.2	c.3094G>A	p.(Glu1032Lys)	3		CPVT	334	2	2	rs369565476	14/276614=0	2/23992=0	0/34406=0	0/10138=0	2/18860=0	0/25770=0	10/126232=0	0/30770=0	0/6446=0	1	1	1	tolerated	0.49	benign	0	56	0.291
1740	both	SCN5A	NM_198056.2	c.3094G>A	p.(Glu1032Lys)	3		HCM	1237	1	1	rs369565476	14/276614=0	2/23992=0	0/34406=0	0/10138=0	2/18860=0	0/25770=0	10/126232=0	0/30770=0	0/6446=0	1	1	1	tolerated	0.49	benign	0	56	0.291
1741	both	SCN5A	NM_198056.2	c.3094G>A	p.(Glu1032Lys)	3		DCM	1238	3	1	rs369565476	14/276614=0	2/23992=0	0/34406=0	0/10138=0	2/18860=0	0/25770=0	10/126232=0	0/30770=0	0/6446=0	1	1	1	tolerated	0.49	benign	0	56	0.291
1742	both	SCN5A	NM_198056.2	c.3190_3192del	p.(Glu1064del)	3		DCM	427	3	2	rs886039126	3/276152=0	2/24008=0	0/34372=0	0/10088=0	0/18862=0	0/25734=0	1/125964=0	0/30694=0	0/6430=0	NA	NA	NA	NA	NA		NA	NA	NA
1743	both	SCN5A	NM_198056.2	c.3190_3192del	p.(Glu1064del)	3		UCM	874	4	3	rs886039126	3/276152=0	2/24008=0	0/34372=0	0/10088=0	0/18862=0	0/25734=0	1/125964=0	0/30694=0	0/6430=0				NA	NA	NA	NA	NA	17.28
1744	both	SCN5A	NM_198056.2	c.3262G>A	p.(Ala1088Thr)	3		Other indication	1207	3	2	rs369704754	32/273882=0	27/23500=0.001	2/34310=0	0/10036=0	0/18770=0	0/25720=0	0/124484=0	1/30672=0	2/6390=0	0	0	0	tolerated	0.6	benign	0	58	13.00
1745	both	SCN5A	NM_198056.2	c.326A>G	p.(Asn109Ser)	3		NCCM	1239	3	1											1	1	0	tolerated	0.5	benign	0.009	46	19.69
1746	both	SCN5A	NM_198056.2	c.3342C>A	p.(Asp1114Glu)	3		HCM	1061	2	2		1/236556=0	0/13948=0	0/32916=0	0/9544=0	0/16878=0	0/21652=0	1/106918=0	0/29416=0	0/5284=0	2	2	1	tolerated	0.36	benign	0.022	0	7355
1747	both	SCN5A	NM_198056.2	c.3347G>A	p.(Arg1116Gln)	3		HCM	1240	1	1	rs369678002	19/264724=0	10/22420=0	1/33490=0	0/9794=0	0/18334=0	0/24926=0	5/120456=0	2/29100=0	1/6204=0	1	1	1	tolerated	0.45	benign	0.003	43	0.729
1748	both	SCN5A	NM_198056.2	c.3374C>G	p.(Ala1125Gly)	3		UCM	956	3	2	rs730880206	3/214990=0	0/12266=0	0/30874=0	0/9088=0	0/15324=0	0/19860=0	3/95568=0	0/27092=0	0/4918=0	0	0	0	tolerated	0.38	benign	0.024	60	16.57
1749	both	SCN5A	NM_198056.2	c.3391-11C>G	p.?	3		DCM	810	5	2	rs866743023													NA	NA	NA	NA	NA	7776
1750	both	SCN5A	NM_198056.2	c.3878T>C	p.(Phe1293Ser)	3		UCM	1241	1	1	rs41311127	157/276724=0.001	1/23992=0	35/34400=0.001	90/10140=0.009	0/18864=0	0/25684=0	23/126450=0	0/30746=0	8/6448=0.001	-2	-2	-3	deleterious	0.03	benign	0.027	155	17.45
1751	both	SCN5A	NM_001099404.1	c.3908G>A	p.(Arg1303Gln)	3		HCM	475	2	2	rs1057517817	2/245050=0	0/15190=0	1/33532=0	0/9816=0	0/17222=0	0/22036=0	1/111190=0	0/30600=0	0/5464=0	1	1	1	deleterious	0		probably damaging	0.999	43
1752	both	SCN5A	NM_198056.2	c.3956G>T	p.(Gly1319Val)	3		DCM	1242	2	1	rs199473220	11/266334=0	2/22934=0	0/33422=0	0/9892=0	0/18340=0	0/24512=0	9/121862=0	0/29092=0	0/6280=0	-3	-3	-4	deleterious	0	probably_damaging	0.994	109	28.9
1753	both	SCN5A	NM_198056.2	c.4628T>C	p.(Val1543Ala)	3		DCM	702	1	1	rs551383710	1/246232=0	0/15292=0	0/33582=0	0/9850=0	0/17248=0	0/22300=0	1/111698=0	0/30782=0	0/5480=0	0	0	0	deleterious	0.01		benign	0.177	64
1754	both	SCN5A	NM_198056.2	c.4786T>A	p.(Phe1596Ile)	3		DCM	452	2	2	rs199473278	30/276230=0	0/24012=0	1/34416=0	0/10136=0	0/18868=0	2/25770=0	25/125810=0	0/30766=0	2/6452=0	0	0	-1	tolerated	0.05		benign	0.362	21
1755	both	SCN5A	NM_001099404.1	c.4786T>A	p.(Phe1596Ile)	3		DCM	703	1	1	rs199473278	30/276230=0	0/24012=0	1/34416=0	0/10136=0	0/18868=0	2/25770=0	25/125810=0	0/30766=0	2/6452=0	0	0	-1	tolerated	0.05		benign	0.362	21
1756	both	SCN5A	NM_198056.2	c.4786T>A	p.(Phe1596Ile)	3		DCM	779	6	3	rs199473278	30/276230=0	0/24012=0	1/34416=0	0/10136=0	0/18868=0	2/25770=0	25/125810=0	0/30766=0	2/6452=0	0	0	-1	deleterious	0.03	benign	0.102	21	24.3
1757	both	SCN5A	NM_198056.2	c.4810G>A	p.(Val1604Met)	3		HCM	429	3	2	rs199473280	8/274230=0	3/24020=0	0/34390=0	0/9994=0	1/18868=0	0/25674=0	3/124416=0	1/30440=0	0/6428=0	1	1	1	tolerated	0.07		benign	0.391	21
1758	both	SCN5A	NM_198056.2	c.4859C>T	p.(Thr1620Met)	3		DCM	1244	1	1	rs199473282	1/246138=0	0/15304=0	0/33580=0	0/9848=0	0/17248=0	0/22288=0	1/111606=0	0/30782=0	0/5482=0	-1	-1	-1	deleterious	0	possibly_damaging	0.736	81	25.2
1759	both	SCN5A	NM_198056.2	c.4880T>C	p.(Leu1627Pro)	3		HCM	1573	2	2											-3	-3	-3	deleterious	0	possibly_damaging	0.702	98	27.4
1760	both	SCN5A	NM_198056.2	c.5329G>A	p.(Val1777Met)	3		HCM	482	2	2	rs199473314	5/277202=0	0/24010=0	0/34420=0	0/10152=0	1/18868=0	0/25794=0	2/126712=0	2/30782=0	0/6464=0	1	1	1	deleterious	0		probably damaging	0.99	21
1761	both	SCN5A	NM_198056.2	c.5360G>A	p.(Ser1787Asn)	3		HCM	704	1	1	rs199473316	226/277220=0.001	0/24020=0	4/34420=0	193/10152=0.019	0/18870=0	0/25794=0	20/126716=0	0/30782=0	9/6466=0.001	1	1	0	tolerated	0.08		probably damaging	0.927	46
1762	both	SCN5A	NM_198056.2	c.5551A>G	p.(Met1851Val)	3	5 (cosegregation)	UCM	705	1	1		1/30942=0	0/8716=0	0/838=0	0/302=0	0/1622=0	0/3494=0	1/14988=0	0/0=0	0/982=0	1	1	1	tolerated	0.1		benign	0.047	21
1763	both	SCN5A	NM_198056.2	c.5692C>T	p.(Arg1898Cys	3		DCM	1248	2	1	rs373118001	11/277222=0	1/24028=0	0/34420=0	0/10152=0	1/18870=0	0/25792=0	8/126718=0	0/30782=0	1/6460=0	-3	-3	-4	deleterious	0	benign	0.097	180	24.9
1764	both	SCN5A	NM_198056.2	c.5743C>T	p.(His1915Tyr)	3		UCM	1446	4	2	rs762462124	4/246252=0	0/15298=0	0/33582=0	0/9850=0	0/17248=0	0/22298=0	4/111716=0	0/30782=0	0/5478=0	2	2	2	tolerated	0.93	benign	0.097	83	22.0
1765	both	SCN5A	NM_198056.2	c.5860G>A	p.(Glu1954Lys)	3		DCM	706	1	1	rs397517956	12/274284=0	9/23892=0	0/34180=0	0/9950=0	0/18718=0	0/25594=0	2/125116=0	0/30422=0	1/6412=0	1	1	1	tolerated	0.19		benign	0.007	56
1766	both	SCN5A	NM_198056.2	c.5961C>A	p.(Asn1987Lys)	3		HCM	707	1	1	rs199473335	3/254540=0	0/23866=0	0/32684=0	0/7804=0	0/18766=0	0/24152=0	3/116972=0	0/24356=0	0/5940=0	0	0	0	tolerated	1		benign	0.186	94
1767	both	SCN5A	NM_198056.2	c.5961C>A	p.(Asn1987Lys)	3		DCM	1471	4	3	rs199473335	3/254540=0	0/23866=0	0/32684=0	0/7804=0	0/18766=0	0/24152=0	3/116972=0	0/24356=0	0/5940=0	0	0	0	tolerated	1	possibly_damaging	0.458	94	22.5
1768	both	SCN5A	NM_198056.2	c.6034C>T	p.(Arg2012Cys)	3		HCM	1040	4	3	rs199473640	8/184766=0	0/14572=0	4/24438=0	0/3964=0	0/15824=0	0/18282=0	3/87146=0	0/16734=0	1/3806=0	-3	-3	-4	deleterious	0	probably_damaging	0.925	180	28.1
1769	both	SCN5A	NM_198056.2	c.611+6T>A	p.?	3		ARVC	1250	2	1														NA	NA	NA	NA	NA	21.5
1770	both	SCN5A	NM_198056.2	c.647C>T	p.(Ser216Leu)	3		SSS	284	2	2	rs41276525	178/271904=0.001	1/23444=0	20/33928=0.001	9/10016=0.001	1/18616=0	1/25514=0	123/124242=0.001	17/29770=0.001	6/6374=0.001	-3	-2	-3	NA	NA	NA	NA	NA	21.4
1771	both	SCN5A	NM_198056.2	c.647C>T	p.(Ser216Leu)	3		HCM	699	1	1	rs41276525	178/271904=0.001	1/23444=0	20/33928=0.001	9/10016=0.001	1/18616=0	1/25514=0	123/124242=0.001	17/29770=0.001	6/6374=0.001	-3	-2	-3	deleterious	0		possibly damaging	0.842	145
1772	both	SCN5A	NM_198056.2	c.647C>T	p.(Ser216Leu)	3		DCM	1251	1	1	rs41276525	178/271904=0.001	1/23444=0	20/33928=0.001	9/10016=0.001	1/18616=0	1/25514=0	123/124242=0.001	17/29770=0.001	6/6374=0.001	-3	-2	-3	NA	NA	NA	NA	NA	21.4
1773	both	SCN5A	NM_198056.2	c.647C>T	p.(Ser216Leu)	3		LQTS	361	2	1	rs41276525	178/271904=0.001	1/23444=0	20/33928=0.001	9/10016=0.001	1/18616=0	1/25514=0	123/124242=0.001	17/29770=0.001	6/6374=0.001	-3	-2	-3	NA	NA	NA	NA	NA	21.4
1774	both	SCN5A	NM_198056.2	c.647C>T w	p.(Ser216Leu)	3		LQTS	369	2	1	rs41276525	178/271904=0.001	1/23444=0	20/33928=0.001	9/10016=0.001	1/18616=0	1/25514=0	123/124242=0.001	17/29770=0.001	6/6374=0.001	-3	-2	-3	NA	NA	NA	NA	NA	21.4
1775	both	SCN5A	NM_198056.2	c.79C>T	p.(Arg27Cys)	3		HCM	1253	3	1	rs746360906	4/245776=0	0/15264=0	0/33580=0	0/9846=0	0/17244=0	0/21970=0	3/111622=0	1/30780=0	0/5470=0	-3	-3	-4	deleterious	0.03	possibly_damaging	0.897	180	26.9
1776	both	SCN5A	NM_198056.2	c.857C>T	p.(Ala286Val)	3		HCM	1185	4	3	rs778943853	2/246198=0	0/15298=0	1/33580=0	0/9848=0	0/17248=0	0/22298=0	1/111666=0	0/30782=0	0/5478=0	0	0	0	tolerated	0.65	benign	0	64	0.008
1777	both	SCN5A	NM_198056.2	c.880G>A	p.(Val294Met)	3		DCM	1254	2	1	rs199473086	2/30978=0	0/8734=0	0/838=0	0/302=0	0/1622=0	0/3494=0	1/15006=0	0/0=0	1/982=0.001	1	1	1	tolerated	0.26	benign	0.253	21	19.65
1778	AR	SLMAP	NM_007159.4	c.1889A>G	p.(Gln630Arg)	3		BRS	389	1	1	rs35029175	146/275618=0.001	3/23924=0	4/34340=0	0/10096=0	0/18796=0	0/25568=0	138/125696=0.001	0/30752=0	1/6446=0	1	1	1	deleterious	0	probably_damaging	0.99	43	25.9
1779	AR	SLMAP	NM_007159.4	c.1940A>G	p.(Lys647Arg)	3		BRS	388	1	1	rs35029175	146/275618=0.001	3/23924=0	4/34340=0	0/10096=0	0/18796=0	0/25568=0	138/125696=0.001	0/30752=0	1/6446=0	1	1	1	tolerated	0.09	benign	0.167	26	22.2
1780	AR	SLMAP	NM_007159.4	c.392A>G	p.(Asp131Gly)	3		UA	391	1	1	rs745559495	1/244442=0	0/15222=0	0/32998=0	0/9812=0	0/17148=0	0/22278=0	1/111144=0	0/30426=0	0/5414=0	-1	-1	-2	deleterious	0.01	possibly_damaging	0.542	94	26.1
1781	AR	SLMAP	NM_007159.4	c.820G>C	p.(Glu274Gln)	3		BRS	390	1	1	rs778019864	6/216718=0	0/14350=0	2/24276=0	0/9016=0	0/14326=0	0/21786=0	4/103788=0	0/24456=0	0/4720=0	2	2	2	tolerated	0.07	probably_damaging	0.943	29	25.0
1782	AR	SLMAP	NM_007159.2	c.1010C>T	p.(Ala337Val)	3		LQTS	387	1	1											0	0	0	tolerated	0.14	benign	0.006	64	22.1
1783	AR	SLMAP	NM_007159.4	c.1601A>G	p.(Gln354Arg)	3		UA	371	2	2	rs141727742	24/276566=0	0/24026=0	4/34382=0	1/10128=0	0/18848=0	0/25736=0	17/126216=0	0/30768=0	2/6462=0	1	1	1	deleterious	0.03	probably_damaging	0.99	43	24.1
1784	AR	SLMAP	NM_007159.4	c.1963G>A	p.(Glu655Lys)	3		BRS	177	2	2	rs147989677	10/245384=0	0/15272=0	4/33432=0	0/9838=0	1/17116=0	0/22284=0	5/111306=0	0/30672=0	0/5464=0	1	1	1	deleterious	0.01	possibly_damaging	0.485	56	25.0
1785	AR	SLMAP	NM_007159.4	c.421G>A	p.(Val141Ile)	3		UA	392	1	1	rs143315729	8/269566=0	0/23716=0	0/32168=0	0/10014=0	0/18300=0	0/25718=0	8/124734=0	0/28682=0	0/6234=0	3	3	3	deleterious	0.04	possibly_damaging	0.848	29	28.6
1786	AR	SNTA1	NM_003098.2	c.128G>A	p.(Ser43Asn)	3		UA	394	1	1	rs786205841	16/101688=0	2/9472=0	0/13678=0	0/6872=0	0/3616=0	0/7354=0	12/41592=0	0/16138=0	2/2966=0.001	1	1	0	tolerated	0.17	benign	0.001	46	21.3
1787	AR	SNTA1	NM_003098.2	c.497-5A>G	p.?	3		UA	393	1	1	rs202178576	3/275336=0	1/24016=0	0/34398=0	0/10130=0	0/18860=0	0/25758=0	2/124960=0	0/30766=0	0/6448=0				NA	NA	NA	NA	NA	15.41
1788	AR	SNTA1	NM_003098.2	c.566C>T	p.(Ser189Leu)	3		UA	7	2	2	rs144860423	56/277064=0	1/24030=0	2/34418=0	0/10148=0	0/18862=0	5/25774=0	46/126582=0	0/30782=0	2/6468=0	-3	-2	-3	tolerated	0.18	probably damaging	0.999	145	23.6
1789	AR	SNTA1	NM_003098.2	c.566C>T	p.(Ser189Leu)	3		ARVC	395	1	1	rs144860423	56/277064=0	1/24030=0	2/34418=0	0/10148=0	0/18862=0	5/25774=0	46/126582=0	0/30782=0	2/6468=0	-3	-2	-3	deleterious	0.01	probably_damaging	0.994	145	31
1790	AR	SNTA1	NM_003098.2	c.677G>A	p.(Cys226Tyr)	3		BRS	20	2	1	rs34479952	38/277184=0	23/24022=0.001	9/34420=0	0/10152=0	0/18866=0	0/25784=0	2/126694=0	0/30782=0	4/6464=0.001	-3	-2	-3	tolerated	0.48	possibly damaging	0.901	194	21.0
1791	AR	SNTA1	NM_003098.2	c.128G>A	p.(Ser43Asn)	3		NCCM	155	2	2	rs786205841	16/101688=0	2/9472=0	0/13678=0	0/6872=0	0/3616=0	0/7354=0	12/41592=0	0/16138=0	2/2966=0.001	1	1	0	tolerated	0.17	benign	0.001	46	21.3
1792	AR	SNTA1	NM_003098.2	c.224C>A	p.(Pro75Gln)	3		CPVT	396	2	1											-1	-1	-2	tolerated	0.21	benign	0.024	76	16.47
1793	AR	SNTA1	NM_003098.2	c.368C>G	p.(Ala123Gly)	3		UA	321	3	2	rs755263941										0	0	0	deleterious	0.01	probably_damaging	1	60	27.4
1794	AR	SNTA1	NM_003098.2	c.994G>A	p.(Glu332Lys)	3		UA	94	1	1											1	1	1	deleterious	0.01	probably damaging	0.957	56	28.9
1795	CM	TAZ		c.368G>A	p.(Arg123Gln)	3		DCM	1534	4	3											1	1	1	deleterious	0	probably_damaging	0.994	43	35
1796	CM	TCAP	NM_003673.3	c.113G>T	p.(Cys38Phe)	3		DCM	1521	2	1	rs375310569	28/266346=0	0/23166=0	11/33872=0	0/9846=0	0/18624=0	0/24602=0	16/120050=0	0/29918=0	1/6268=0	-2	-2	-3	deleterious	0.05	possibly_damaging	0.898	205	25.0
1797	CM	TCAP	NM_003673.3	c.188G>A	p.(Arg63His)	3		DCM	1470	4	3	rs777384494	3/233122=0	0/14180=0	1/32516=0	0/9354=0	0/16756=0	0/20738=0	2/104742=0	0/29624=0	0/5212=0	0	0	0	tolerated	0.12	benign	0.005	29	15.84
1798	CM	TCAP	NM_003673.3	c.239A>T	p.(Glu80Val)	3		UCM	708	1	1											-3	-2	-3	deleterious	0		probably damaging	0.966	121
1799	CM	TCAP	NM_003673.3	c.313G>A	p.(Glu105Lys)	3		UCM	1314	3	3	rs146906267	27/244600=0	0/15100=0	0/33556=0	0/9810=0	23/17206=0.001	0/22046=0	4/110664=0	0/30762=0	0/5456=0	1	1	1	tolerated	0.18	benign	0.258	56	23.0
1800	CM	TCAP	NM_003673.2	c.316C>T	p.(Arg106Cys)	3		DCM	494	2	2	rs45578741	6014/275442=0.022	42/23830=0.002	5239/34340=0.153	13/10106=0.001	3/18832=0	7/25510=0	525/125632=0.004	55/30754=0.002	130/6438=0.02	-3	-3	-4	deleterious	0.02		probably damaging	0.949	180
1801	CM	TCAP	NM_003673.2	c.316C>T	p.(Arg106Cys)	3		DCM	709	1	1	rs45578741	6014/275442=0.022	42/23830=0.002	5239/34340=0.153	13/10106=0.001	3/18832=0	7/25510=0	525/125632=0.004	55/30754=0.002	130/6438=0.02	-3	-3	-4	deleterious	0.02		probably damaging	0.949	180
1802	CM	TCAP	NM_003673.3	c.316C>T	p.(Arg106Cys)	3		UCM	710	1	1	rs45578741	6014/275442=0.022	42/23830=0.002	5239/34340=0.153	13/10106=0.001	3/18832=0	7/25510=0	525/125632=0.004	55/30754=0.002	130/6438=0.02	-3	-3	-4	deleterious	0.02		probably damaging	0.949	180
1803	CM	TCAP	NM_003673.3	c.389G>A	p.(Arg130His)	3		DCM	482	2	2	rs147503632	0/244804=0	0/15234=0	0/33574=0	0/9822=0	0/17222=0	0/21468=0	0/111232=0	0/30778=0	0/5474=0	0	0	0	deleterious	0.01		probably damaging	0.945	29
1804	CM	TCAP	NM_003673.3	c.389G>A	p.(Arg130His)	3		UCM	1256	3	1	rs147503632	0/244804=0	0/15234=0	0/33574=0	0/9822=0	0/17222=0	0/21468=0	0/111232=0	0/30778=0	0/5474=0	0	0	0	deleterious	0	probably_damaging	0.945	29	32
1805	CM	TCAP	NM_003673.3	c.448G>A	p.(Gly150Ser)	3		HCM	752	6	6	rs762850913	16/271050=0	1/23948=0	1/34404=0	0/10120=0	0/18840=0	0/20308=0	11/126228=0	2/30778=0	1/6424=0	0	0	-1	tolerated	0.48	benign	0.278	56	16.08
1806	CM	TCAP	NM_003673.3	c.457C>T	p.(Arg153Cys)	3		HCM	834	2	2	rs761498487	4/238968=0	1/15200=0	0/33562=0	0/9824=0	0/17210=0	0/15786=0	2/111192=0	0/30770=0	1/5424=0	-3	-3	-4	tolerated	0.08	benign	0.001	180	22.0
1807	CM	TCAP	NM_003673.3	c.59C>T	p.(Ala20Val)	3		UCM	1257	2	1											0	0	0	tolerated	0.39	benign	0.091	64	15.89
1808	CM	TMEM43	NM_024334.2	c.1178G>A	p.(Arg393Gln)	3		NCCM	711	1	1	rs758037497	2/245924=0	0/15296=0	0/33574=0	0/9842=0	1/17240=0	0/22136=0	1/111580=0	0/30780=0	0/5476=0	1	1	1	tolerated	0.12		benign	0.328	43
1809	CM	TMEM43	NM_024334.2	c.297+11C>T	p.?	3		DCM	1258	3	1														NA	NA	NA	NA	NA	2733
1810	CM	TMEM43	NM_024334.2	c.424G>A	p.(Glu142Lys)	3		HCM	1259	1	1	rs76992529	417/277140=0.002	385/24034=0.016	23/34418=0.001	0/10150=0	0/18860=0	0/25766=0	5/126662=0	2/30782=0	2/6468=0	3	3	3	tolerated	0.05	probably_damaging	0.986	29	19.57
1811	CM	TMEM43	NM_024334.2	c.484G>A	p.(Asp162Asn)	3		UCM	1260	3	1	rs150425166	22/277192=0	22/24010=0.001	0/34418=0	0/10152=0	0/18870=0	0/25792=0	0/126706=0	0/30782=0	0/6462=0	2	1	1	tolerated	0.09	possibly_damaging	0.856	23	25.6
1812	CM	TMEM43	NM_024334.2	c.718C>T	p.(Arg240Cys)	3		DCM	1561	3	3	rs367910936	46/275704=0	3/23998=0	9/34408=0	0/10138=0	0/18866=0	6/24538=0	28/126536=0	0/30782=0	0/6438=0	-3	-3	-4	deleterious	0	possibly_damaging	0.571	180	27.3
1813	CM	TMEM43	NM_024334.2	c.802C>T	p.(Arg268Trp)	3		HCM	1101	3	2	rs201138253	45/275490=0	0/24022=0	40/34418=0.001	0/10148=0	3/18866=0	0/25758=0	1/125042=0	0/30778=0	1/6458=0	-2	-3	-4	deleterious	0	possibly_damaging	0.761	101	25.7
1814	CM	TMEM43	NM_024334.2	c.947G>C	p.(Trp316Ser)	3		HCM	969	2	2	rs199526104	43/277196=0	0/24032=0	2/34418=0	0/10152=0	0/18870=0	0/25788=0	28/126692=0	12/30782=0	1/6462=0	-4	-3	-4	deleterious	0	probably_damaging	0.986	177	28.5
1815	CM	TNNC1	NM_003280.1	c.23C>T	p.(Ala8Val)	4		DCM	605	1	1	rs267607125	1/202896=0	0/11750=0	0/30326=0	0/8932=0	0/14978=0	0/18090=0	1/87634=0	0/26472=0	0/4714=0	0	0	0	tolerated	0.15		benign	0.22	64
1816	CM	TNNC1	NM_003280.2	c.23C>T	p.(Ala8Val)	4		HCM	1261	2	1	rs267607125	1/202896=0	0/11750=0	0/30326=0	0/8932=0	0/14978=0	0/18090=0	1/87634=0	0/26472=0	0/4714=0	0	0	0	tolerated	0.11	benign	0.109	64	25.3
1817	CM	TNNC1	NM_003280.2	c.23C>T	p.(Ala8Val)	4		UCM	1262	3	1	rs267607125	1/202896=0	0/11750=0	0/30326=0	0/8932=0	0/14978=0	0/18090=0	1/87634=0	0/26472=0	0/4714=0	0	0	0	tolerated	0.11	benign	0.109	64	25.3
1818	CM	TNNC1	NM_003280.2	c.106dup	p.(Ile36Asnfs*20)	3		DCM	1518	2	1														NA	NA	NA	NA	NA	32
1819	CM	TNNC1	NM_003280.1	c.157A>G	p.(Thr53Ala)	3		DCM	476	2	2											0	0	0	deleterious	0		benign	0.026	58
1820	CM	TNNC1	NM_003280.1	c.184G>A	p.(Asp62Asn)	3		UCM	510	2	1											2	1	1	tolerated	1		probably damaging	0.987	23
1821	CM	TNNC1	NM_003280.2	c.210C>T	p.(Gly70Gly)	3		HCM	499	2	2	rs141505676	32/277122=0	0/24018=0	0/34418=0	0/10152=0	1/18868=0	0/25776=0	30/126646=0	0/30782=0	1/6462=0	NA	NA	NA	NA	NA		NA	NA	NA
1822	CM	TNNC1	NM_003280.2	c.430A>G	p.(Asn144Asp)	3		HCM	450	2	2	rs730881061										2	1	1	deleterious	0.01		benign	0.102	23
1823	CM	TNNC1	NM_003280.2	c.430A>G	p.(Asn144Asp)	3		HCM	712	1	1	rs730881061										2	1	1	deleterious	0.01		benign	0.102	23
1824	CM	TNNC1		c.436G>A	p.(Gly146Ser)	3		LQTS	267	4	2	rs567327895	4/276892=0	0/23998=0	0/34412=0	0/10142=0	1/18864=0	0/25782=0	2/126456=0	1/30780=0	0/6458=0	0	0	-1	deleterious	0.02	probably_damaging	0.996	56	29.7
1825	CM	TNNC1	NM_003280.1	c.436G>A	p.(Gly146Ser)	3		DCM	713	1	1	rs567327895	4/276892=0	0/23998=0	0/34412=0	0/10142=0	1/18864=0	0/25782=0	2/126456=0	1/30780=0	0/6458=0	0	0	-1	deleterious	0.04		probably damaging	0.994	56
1826	CM	TNNC1	NM_003280.2	c.439C>T	p.(Arg147Cys)	3		DCM	1263	3	1	rs796243470	3/245950=0	0/15274=0	1/33578=0	0/9838=0	1/17242=0	0/22296=0	0/111472=0	1/30776=0	0/5474=0	-3	-3	-4	deleterious	0	benign	0.413	180	25.4
1827	CM	TNNC1	NM_003280.2	c.445G>A	p.(Asp149Asn)	3		DCM	1264	1	1	rs397516849										2	1	1	tolerated	1	probably_damaging	0.992	23	24.0
1828	CM	TNNC1	NM_003280.2	c.445G>A	p.(Asp149Asn)	3		DCM	1565	2	2											1	1	1	deleterious	0	probably_damaging	0.971	56	32
1829	CM	TNNC1	NM_003280.2	c.4G>A	p.(Asp2Asn)	3		HCM	751	4	2	rs886058707										2	1	1	tolerated	0.17	benign	0	23	22.8
1830	CM	TNNC1	NM_003280.2	c.4G>A	p.(Asp2Asn)	3		HCM	1265	2	1	rs886058707										2	1	1	tolerated	0.17	benign	0	23	22.8
1831	CM	TNNI3	NM_000363.4	c.433C>T	p.(Arg145Trp)	5		HCM	566	1	1	rs104894724	3/276468=0	0/23998=0	0/34418=0	0/10150=0	0/18866=0	0/25152=0	1/126650=0	1/30782=0	1/6452=0	-2	-3	-4	deleterious	0		possibly damaging	0.557	101
1832	CM	TNNI3	NM_000363.4	c.497C>T	p.(Ser166Phe)	5		HCM	1268	2	1	rs727504242	2/245720=0	0/15270=0	0/33580=0	0/9850=0	0/17246=0	0/21902=0	2/111618=0	0/30782=0	0/5472=0	-2	-2	-3	deleterious	0	possibly_damaging	0.544	155	24.9
1833	CM	TNNI3	NM_000363.4	c.497C>T	p.(Ser166Phe)	5		HCM	1269	1	1	rs727504242	2/245720=0	0/15270=0	0/33580=0	0/9850=0	0/17246=0	0/21902=0	2/111618=0	0/30782=0	0/5472=0	-2	-2	-3	deleterious	0	possibly_damaging	0.544	155	24.9
1834	CM	TNNI3	NM_000363.4	c.626A>C	p.(Glu209Ala)	5		UCM	417	4	1	rs730881083										-1	-1	-1	deleterious	0.01		benign	0.167	107
1835	CM	TNNI3	NM_000363.4	c.626A>C	p.(Glu209Ala)	5		UCM	1271	2	1	rs730881083										-1	-1	-1	deleterious	0	possibly_damaging	0.899	107	26.8
1836	CM	TNNI3	NM_000363.4	c.421C>T	p.(Arg141Trp)	4		UCM	606	1	1	rs730881071	2/245398=0	0/15286=0	0/33580=0	0/9850=0	0/17246=0	0/21508=0	2/111678=0	0/30780=0	0/5470=0	-2	-3	-4	deleterious	0		probably damaging	0.97	101
1837	CM	TNNI3	NM_000363.4	c.484C>T	p.(Arg162Trp	4		HCM	607	1	1	rs368861241	10/245660=0	0/15272=0	1/33578=0	0/9850=0	3/17246=0	0/21856=0	3/111610=0	3/30782=0	0/5466=0	-2	-3	-4	deleterious	0		possibly damaging	0.899	101
1838	CM	TNNI3	NM_000363.4	c.531G>T	p.(Lys177Asn)	4		HCM	1270	3	1											0	0	0	deleterious	0	possibly_damaging	0.844	94	25.0
1839	CM	TNNI3	NM_000363.4	c.368C>T	p.(Thr123Met)	3		HCM	505	2	2	rs397516345	2/246078=0	1/15292=0	0/33578=0	0/9848=0	0/17246=0	0/22268=0	1/111606=0	0/30764=0	0/5476=0	-1	-1	-1	tolerated	0.2		probably damaging	0.982	81
1840	CM	TNNI3	NM_000363.4	c.407G>A	p.(Arg136Gln)	3		UCM	1266	3	1	rs730881069	1/245296=0	0/15268=0	0/33580=0	0/9848=0	0/17246=0	0/21446=0	1/111652=0	0/30782=0	0/5474=0	1	1	1	tolerated	0.17	possibly_damaging	0.775	43	24.6
1841	CM	TNNI3	NM_000363.4	c.484C>T	p.(Arg162Trp)	3		HCM	1267	2	1	rs368861241	10/245660=0	0/15272=0	1/33578=0	0/9850=0	3/17246=0	0/21856=0	3/111610=0	3/30782=0	0/5466=0	-2	-3	-4	deleterious	0	probably_damaging	0.915	101	31
1842	CM	TNNI3	NM_000363.4	c.539A>G	p.(Asp180Gly)	3		UCM	714	1	1											-1	-1	-2	deleterious	0.05		possibly damaging	0.872	94
1843	CM	TNNI3	NM_000363.4	c.539A>G	p.(Asp180Gly)	3		DCM	715	1	1											-1	-1	-2	deleterious	0.05		possibly damaging	0.872	94
1844	both	TNNT2	NM_000364.2	c.877C>T	p.(Arg293Cys)	4		UA	398	1	1	rs367785431	5/238034=0	0/14636=0	0/32924=0	0/9634=0	3/16878=0	0/21458=0	2/108100=0	0/29100=0	0/5304=0	-3	-3	-4	deleterious	0	probably_damaging	0.966	180	31
1845	both	TNNT2	NM_000364.3	c.411+1G>A	p.?	3		UA	400	1	1	rs766666484	0/246270=0	0/15304=0	0/33582=0	0/9850=0	0/17248=0	0/22300=0	0/111718=0	0/30782=0	0/5486=0				NA	NA	NA	NA	NA	34
1846	both	TNNT2	NM_000364.3	c.277G>A	p.(Glu93Lys)	5		HCM	567	1	1	rs150008205	2/246262=0	0/15302=0	0/33580=0	0/9850=0	0/17248=0	0/22300=0	2/111714=0	0/30782=0	0/5486=0	1	1	1	deleterious	0		probably damaging	0.987	56
1847	both	TNNT2	NM_000364.3	c.277G>A	p.(Glu93Lys)	5		LQTS	397	2	1	rs727504244	1/30968=0	0/8728=0	0/838=0	0/302=0	0/1620=0	0/3494=0	1/15004=0	0/0=0	0/982=0	1	1	1	deleterious	0	probably_damaging	0.987	56	29.5
1848	both	TNNT2	NM_000364.3	c.304C>T	p.(Arg102Trp)	5		HCM	568	1	1	rs397516456	1/246186=0	0/15302=0	0/33582=0	0/9848=0	0/17248=0	0/22262=0	1/111678=0	0/30782=0	0/5484=0	-2	-3	-4	deleterious	0		probably damaging	0.999	101
1849	both	TNNT2	NM_000364.3	c.304C>T	p.(Arg102Trp)	5		HCM	569	1	1	rs397516456	1/246186=0	0/15302=0	0/33582=0	0/9848=0	0/17248=0	0/22262=0	1/111678=0	0/30782=0	0/5484=0	-2	-3	-4	deleterious	0		probably damaging	0.999	101
1850	both	TNNT2	NM_000364.3	c.304C>T	p.(Arg102Trp)	5		HCM	570	1	1	rs397516456	1/246186=0	0/15302=0	0/33582=0	0/9848=0	0/17248=0	0/22262=0	1/111678=0	0/30782=0	0/5484=0	-2	-3	-4	deleterious	0		probably damaging	0.999	101
1851	both	TNNT2	NM_000364.3	c.304C>T	p.(Arg102Trp)	5		HCM	1273	3	1	rs397516456	1/246186=0	0/15302=0	0/33582=0	0/9848=0	0/17248=0	0/22262=0	1/111678=0	0/30782=0	0/5484=0	-2	-3	-4	deleterious	0	probably_damaging	0.999	101	29.6
1852	both	TNNT2	NM_000364.3	c.305G>A	p.(Arg102Gln)	5		HCM	1274	1	1	rs121964856										1	1	1	deleterious	0.02	probably_damaging	0.988	43	32
1853	both	TNNT2	NM_000364.3	c.650_652del	p.(Lys217del)	5		DCM	571	1	1	rs45578238										NA	NA	NA	NA	NA		NA	NA	NA
1854	both	TNNT2	NM_000364.3	c.650_652del	p.(Lys217del)	5		DCM	1278	1	1	rs45578238													NA	NA	NA	NA	NA	21.1
1855	both	TNNT2	NM_001276347.1	c.613C>T	p.(Arg205Trp)	4		DCM	1277	1	1	rs45586240										-2	-3	-4	deleterious	0	probably_damaging	0.999	101	25.9
1856	both	TNNT2	NM_001276347.1	c.814C>T	p.(Gln272*)	4		HCM	465	2	1	rs796925245										NA	NA	NA	NA	NA		NA	NA	NA
1857	both	TNNT2	NM_000364.2	c.853C>T	p.(Arg285Cys)	4		HCM	442	2	2	rs121964857	95/270138=0	6/23488=0	11/33914=0	0/9970=0	0/18592=0	3/25064=0	74/123324=0.001	0/29468=0	1/6318=0	-3	-3	-4	tolerated	0.08		probably damaging	0.966	180
1858	both	TNNT2	NM_000364.3	c.853C>T	p.(Arg285Cys)	4		HCM	466	2	1	rs121964857	95/270138=0	6/23488=0	11/33914=0	0/9970=0	0/18592=0	3/25064=0	74/123324=0.001	0/29468=0	1/6318=0	-3	-3	-4	tolerated	0.08		probably damaging	0.966	180
1859	both	TNNT2	NM_000364.3	c.853C>T	p.(Arg285Cys)	4		HCM	608	1	1	rs121964857	95/270138=0	6/23488=0	11/33914=0	0/9970=0	0/18592=0	3/25064=0	74/123324=0.001	0/29468=0	1/6318=0	-3	-3	-4	tolerated	0.08		probably damaging	0.966	180
1860	both	TNNT2	NM_000364.3	c.853C>T	p.(Arg285Cys)	4		HCM	1280	2	1	rs121964857	95/270138=0	6/23488=0	11/33914=0	0/9970=0	0/18592=0	3/25064=0	74/123324=0.001	0/29468=0	1/6318=0	-3	-3	-4	tolerated	0.1	probably_damaging	0.917	180	25.0
1861	both	TNNT2	NM_000364.3	c.853C>T	p.(Arg285Cys)	4		HCM	1281	1	1	rs121964857	95/270138=0	6/23488=0	11/33914=0	0/9970=0	0/18592=0	3/25064=0	74/123324=0.001	0/29468=0	1/6318=0	-3	-3	-4	tolerated	0.1	probably_damaging	0.917	180	25.0
1862	both	TNNT2	NM_000364.2	c.877C>T	p.(Arg293Cys)	4		HCM	609	1	1	rs367785431	5/238034=0	0/14636=0	0/32924=0	0/9634=0	3/16878=0	0/21458=0	2/108100=0	0/29100=0	0/5304=0	-3	-3	-4	deleterious	0		probably damaging	0.953	180
1863	both	TNNT2	NM_000364.3	c.229C>A	p.(Pro77Thr)	3		HCM	415	3	3	rs774702133	1/246230=0	0/15304=0	0/33582=0	0/9850=0	0/17246=0	0/22268=0	1/111714=0	0/30782=0	0/5484=0	-1	-1	-2	deleterious	0.01		probably damaging	0.962	38
1864	both	TNNT2	NM_000364.3	c.260C>T	p.(Pro87Leu)	3		DCM	430	3	2	rs144900708	9/245944=0	0/15256=0	6/33558=0	0/9846=0	0/17246=0	0/22238=0	3/111596=0	0/30722=0	0/5482=0	-3	-3	-5	deleterious	0.04		possibly damaging	0.657	98
1865	both	TNNT2	NM_000364.3	c.283G>A	p.(Val95Met)	3		HCM	1272	2	1											1	1	1	deleterious	0	probably_damaging	0.984	21	26.0
1866	both	TNNT2	NM_000364.3	c.375del	p.(Glu126Argfs*66)	3		DCM	1586	1	1	rs560019679										0	0	0	NA	NA	NA	NA	NA	25.1
1867	both	TNNT2	NM_000364.3	c.40G>T	p.(Glu14*)	3		NCCM	716	1	1	rs772890125	1/246262=0	0/15304=0	0/33582=0	0/9850=0	0/17248=0	0/22290=0	1/111720=0	0/30782=0	0/5486=0	NA	NA	NA	NA	NA		NA	NA	NA
1868	both	TNNT2	NM_000364.3	c.472C>T	p.(Arg158Trp)	3		DCM	1275	1	1	rs730881123										0	0	0	deleterious	0	probably_damaging	0.999	101	31
1869	both	TNNT2	NM_001276347.1	c.56C>G	p.(Ala19Gly)	3		NCCM	490	2	2	rs753645200	5/240990=0	0/15242=0	0/33346=0	0/9792=0	0/17206=0	0/19026=0	0/110456=0	5/30496=0	0/5426=0	0	0	0	tolerated	0.34		benign	0	60
1870	both	TNNT2	NM_001276347.1	c.571-1G>A	p.?	3		HCM	1276	2	1	rs483352835	5/243852=0	0/15214=0	0/33522=0	0/9834=0	1/17230=0	0/22280=0	0/109698=0	4/30612=0	0/5462=0				NA	NA	NA	NA	NA	32
1871	both	TNNT2	NM_000364.3	c.604G>A	p.(Glu202Lys)	3		HCM	446	2	2	rs150008205	2/246262=0	0/15302=0	0/33580=0	0/9850=0	0/17248=0	0/22300=0	2/111714=0	0/30782=0	0/5486=0	1	1	1	tolerated	0.14		possibly damaging	0.458	56
1872	both	TNNT2	NM_000364.3	c.652A>T	p.(Ile218Phe)	3		DCM	718	1	1	rs45578238										0	0	-1	deleterious	0.03		probably damaging	0.965	21
1873	both	TNNT2	NM_000364.3	c.753G>T	p.(Glu251Asp)	3		ARVC	399	1	1	rs45466197	59/277176=0	0/24010=0	0/34418=0	0/10152=0	0/18868=0	0/25792=0	59/126688=0	0/30782=0	0/6466=0	2	2	1	deleterious	0	possibly_damaging	0.881	0	23.6
1874	both	TNNT2	NM_000364.3	c.766G>A	p.(Asp256Asn)	3		NCCM	719	1	1	rs141805127	6/277164=0	0/24000=0	5/34418=0	0/10152=0	1/18870=0	0/25792=0	0/126684=0	0/30782=0	0/6466=0	2	1	1	deleterious	0		possibly damaging	0.821	23
1875	both	TNNT2	NM_000364.3	c.824T>C	p.(Ile275Thr)	3		DCM	1279	1	1											-1	-1	-1	deleterious	0	possibly_damaging	0.693	89	27.7
1876	both	TNNT2	NM_000364.3	c.886T>C	p.(*296GlnEXT*42)	3		DCM	1620	1	1											-5	-4	-6	NA	NA	NA	NA	NA	11.51
1877	both	TNNT2	NM_000364.3	c.94G>C	p.(Asp32His)	3		UA	168	2	2	rs572078239	27/246256=0	0/15304=0	0/33582=0	0/9848=0	0/17248=0	0/22294=0	0/111712=0	26/30782=0.001	1/5486=0	0	-1	-2	NA	NA	NA	NA	NA	15.32
1878	both	TNNT2	NM_000364.3	c.97G>A	p.(Glu33Lys)	3		HCM	1546	3	3	rs377474357	1/246248=0	0/15304=0	0/33580=0	0/9848=0	0/17248=0	0/22290=0	1/111710=0	0/30782=0	0/5486=0	1	1	1	NA	NA	NA	NA	NA	18.39
1879	CM	TPM1	NM_000366.5	c.842T>C	p.(Met281Thr)	5		HCM	1284	3	1	rs199476321	1/245600=0	0/15248=0	0/33528=0	0/9828=0	0/17236=0	0/22244=0	1/111438=0	0/30610=0	0/5468=0	-1	-1	-1	NA	NA	NA	NA	NA	22.4
1880	CM	TPM1	NM_000366.5	c.250G>A	p.(Asp84Asn)	4		UCM	610	1	1	rs754664923	1/246234=0	0/15304=0	0/33582=0	0/9850=0	0/17248=0	0/22298=0	1/111686=0	0/30782=0	0/5484=0	2	1	1	deleterious	0.01		benign	0.085	23
1881	CM	TPM1	NM_000366.5	c.725C>T	p.(Ala242Val)	4		DCM	1282	1	1	rs397517906	2/246234=0	0/15302=0	0/33582=0	0/9848=0	0/17248=0	0/22276=0	0/111710=0	2/30782=0	0/5486=0	0	0	0	deleterious	0.01	possibly_damaging	0.657	64	26.0
1882	CM	TPM1	NM_000366.5	c.*2C>T	p.?	3		ARVC	1374	4	4	rs375043184	47/275192=0	18/23810=0.001	3/34250=0	0/10102=0	0/18806=0	7/25618=0	7/125788=0	11/30388=0	1/6430=0				NA	NA	NA	NA	NA	17.78
1883	CM	TPM1	NM_000366.5	c.585A>C	p.(Glu195Asp)	3		HCM	721	1	1											2	2	1	tolerated	0.08		benign	0.135	0
1884	CM	TPM1	NM_000366.5	c.622A>G	p.(Met208Val)	3		HCM	722	1	1		1/246264=0	0/15304=0	0/33582=0	0/9848=0	0/17248=0	0/22300=0	0/111714=0	1/30782=0	0/5486=0	1	1	1	deleterious	0		benign	0.005	21
1885	CM	TPM1	NM_000366.5	c.657C>A	p.(Asp219Glu)	3		HCM	723	1	1											2	2	1	tolerated	0.68		benign	0.155	0
1886	CM	TPM1	NM_000366.5	c.677A>G	p.(Lys226Arg)	3		HCM	724	1	1	rs730881144										3	2	2	tolerated	0.42		benign	0.197	26
1887	CM	TPM1	NM_000366.5	c.725C>T	p.(Ala242Val)	3	4 (more patients/families)	DCM	725	1	1	rs397516387	1/246228=0	0/15304=0	0/33582=0	0/9848=0	0/17248=0	0/22300=0	1/111680=0	0/30782=0	0/5484=0	0	0	0	deleterious	0		possibly damaging	0.539	64
1888	CM	TPM1	NM_001018020.1	c.775A>G	p.(Lys259Glu)	3		HCM	726	1	1	rs144045691	245/274650=0.001	0/24028=0	1/34418=0	0/10144=0	0/18870=0	141/25770=0.005	92/124198=0.001	0/30782=0	11/6440=0.002	1	1	1	tolerated	1		benign	0.002	56
1889	CM	TPM1	NM_000366.5	c.781T>C	p.(Tyr261His)	3		UCM	1283	2	1											2	2	2	NA	NA	NA	NA	NA	17.62
1890	CM	TPM1	NM_000366.5	c.850A>G	p.(Met284Val)	3		NCCM	727	1	1	rs199476322										1	1	1	deleterious	0		possibly damaging	0.803	21
1891	CM	TPM1	NM_000366.5	c.850A>G	p.(Met284Val)	3		HCM	966	3	2	rs199476322										1	1	1	NA	NA	NA	NA	NA	22.2
1892	CM	TPM1	NM_000366.5	c.97G>A	p.(Glu33Lys)	3		DCM	720	1	1	rs397516397										1	1	1	tolerated	0.06		possibly damaging	0.701	56
1893	AR	TRDN	NM_006073.3	c.1187-2A>G	p.?	3		UA	404	1	1	rs578024729	93/145456=0.001	0/7700=0	0/22668=0	0/7798=0	0/9784=0	0/15236=0	0/57630=0	93/20940=0.004	0/3700=0				NA	NA	NA	NA	NA	32
1894	AR	TRDN	NM_006073.3	c.1331G>A	p.(Gly444Glu)	3		BRS	20	2	2	rs761053339	6/244104=0	0/15140=0	0/33132=0	0/9746=0	0/17118=0	0/22188=0	1/110722=0	3/30636=0	2/5422=0	-2	-2	-3	tolerated	1	benign	0.106	98	22.8
1895	AR	TRDN	NM_006073.3	c.529A>T	p.(Lys177*)	3		VF	402	1	1		1/30902=0	0/8728=0	0/836=0	0/302=0	0/1600=0	0/3464=0	1/14994=0	0/0=0	0/978=0	-5	-4	-6	NA	NA	NA	NA	NA	36
1896	AR	TRDN	NM_006073.3	c.529A>T	p.(Lys177*)	3		VF	403	2	1		1/30902=0	0/8728=0	0/836=0	0/302=0	0/1600=0	0/3464=0	1/14994=0	0/0=0	0/978=0	-5	-4	-6	NA	NA	NA	NA	NA	36
1897	AR	TRDN	NM_006073.3	c.125C>T	p.(Thr42Met)	3		BRS	376	3	3	rs371627659	20/277102=0	2/24020=0	3/34406=0	0/10150=0	0/18862=0	0/25790=0	12/126634=0	3/30782=0	0/6458=0	-1	-1	-1	deleterious	0	probably_damaging	1	81	26.5
1898	AR	TRDN	NM_006073.3	c.224A>T	p.(Asn75Ile)	3		UA	401	3	1	rs368939536	1/245782=0	0/15282=0	0/33556=0	0/9826=0	0/17240=0	0/22284=0	1/111418=0	0/30708=0	0/5468=0	-2	-3	-4	deleterious	0	probably_damaging	0.99	149	26.2
1899	AR	TRDN	NM_006073.3	c.841G>A	p.(Asp281Asn)	3		BRS	95	1	1											2	1	1	tolerated	0.07	benign	0.071	23	25.8
1900	AR	TRDN	NM_006073.3	duplication entire gene		3		AF	372	4	4														NA	NA	NA	NA	NA
1901	AR	TRPM4	NM_017636.3	c.1294G>A	p.(Ala432Thr)	3		BRS	407	2	1	rs201907325	123/276320=0	2/23984=0	39/34406=0.001	0/10128=0	0/18856=0	0/25570=0	61/126148=0	9/30774=0	12/6454=0.002	0	0	0	deleterious	0	probably_damaging	0.961	58	25.7
1902	AR	TRPM4	NM_017636.3	c.2508C>T	p.(Gly836Gly)	3		BRS	409	1	1	rs750999263													NA	NA	NA	NA	NA	9394
1903	AR	TRPM4	NM_017636.3	c.2531G>A	p.(Gly844Asp)	3		UA	405	1	1	rs200038418	179/183122=0.001	4/16554=0	33/26454=0.001	0/8596=0	0/12946=0	5/10786=0	123/79180=0.002	0/23676=0	14/4930=0.003	-1	-1	-2	tolerated	0.12	possibly_damaging	0.525	94	16.34
1904	AR	TRPM4	NM_017636.3	c.2531G>A	p.(Gly844Asp)	3		VF	412	1	1	rs200038418	179/183122=0.001	4/16554=0	33/26454=0.001	0/8596=0	0/12946=0	5/10786=0	123/79180=0.002	0/23676=0	14/4930=0.003	-1	-1	-2	tolerated	0.12	possibly_damaging	0.525	94	16.34
1905	AR	TRPM4	NM_017636.3	c.2531G>A	p.(Gly844Asp)	3		UA	228	1	1	rs200038418	179/183122=0.001	4/16554=0	33/26454=0.001	0/8596=0	0/12946=0	5/10786=0	123/79180=0.002	0/23676=0	14/4930=0.003	-1	-1	-2	tolerated	0.12	possibly_damaging	0.525	94	16.34
1906	AR	TRPM4	NM_017636.3	c.2531G>A	p.(Gly844Asp)	3		UA	406	1	1	rs200038418	179/183122=0.001	4/16554=0	33/26454=0.001	0/8596=0	0/12946=0	5/10786=0	123/79180=0.002	0/23676=0	14/4930=0.003	-1	-1	-2	tolerated	0.12	possibly_damaging	0.525	94	16.34
1907	AR	TRPM4	NM_017636.3	c.2573T>G	p.(Leu858Arg)	3		UA	410	1	1	rs759360663	1/205270=0	0/12144=0	0/31438=0	0/9170=0	0/15210=0	0/10888=0	1/94034=0	0/27582=0	0/4804=0	-2	-2	-3	deleterious	0.04	benign	0.043	102	22.5
1908	AR	TRPM4	NM_017636.3	c.2665del	p.(His889Thrfs*35)	3		CPVT	112	1	1	rs777047595	37/276990=0	1/24014=0	0/34420=0	0/10148=0	0/18866=0	0/25786=0	33/126512=0	2/30782=0	1/6462=0				NA	NA	NA	NA	NA	24.3
1909	AR	TRPM4	NM_017636.3	c.2740A>T	p.(Lys914*)	3		BRS	13	2	2	rs140799936	336/277038=0.001	6/24016=0	28/34420=0.001	0/10150=0	0/18866=0	47/25766=0.002	247/126580=0.002	0/30782=0	8/6458=0.001	NA	NA	NA	NA	NA	NA	NA	NA	54
1910	AR	TRPM4	NM_017636.3	c.2999G>A	p.(Trp1000*)	3		SSS	413	2	1											-5	-4	-6	NA	NA	NA	NA	NA	43
1911	AR	TRPM4	NM_017636.3	c.3387G>C	p.(Lys1129Asn)	3		UA	411	1	1	rs528838962	12/245480=0	0/15240=0	0/33558=0	0/9794=0	0/17220=0	0/22294=0	0/111212=0	12/30708=0	0/5454=0	0	0	0	deleterious	0	probably_damaging	0.997	94	16.67
1912	AR	TRPM4	NM_017636.3	c.416G>A	p.(Arg139His)	3		UA	408	1	1	rs200360191	11/271478=0	4/23758=0	4/34364=0	0/10080=0	0/18804=0	0/23410=0	2/123924=0	1/30744=0	0/6394=0	0	0	0	deleterious	0	probably_damaging	0.998	29	27.9
1913	AR	TRPM4	NM_017636.3	c.635G>A	p.(Arg212Gln)	3		BRS	96	1	1	rs183306159	8/246042=0	0/15294=0	1/33578=0	0/9846=0	5/17244=0	0/22288=0	2/111530=0	0/30780=0	0/5482=0	1	1	1	tolerated	0.3	benign	0.017	43	0.282
1914	AR	TRPM4	NM_017636.3	c.1294G>A(;)c.1294G>A	p.(Ala432Thr)	3		UA	230	2	1	rs201907325	123/276320=0	2/23984=0	39/34406=0.001	0/10128=0	0/18856=0	0/25570=0	61/126148=0	9/30774=0	12/6454=0.002	0	0	0	deleterious	0	probably_damaging	0.961	58	25.7
1915	AR	TRPM4	NM_017636.3	c.1324C>T	p.(Arg442Cys)	3		UA	97	1	1	rs148867331	19/246030=0	1/15298=0	0/33574=0	0/9844=0	0/17248=0	4/22260=0	14/111546=0	0/30780=0	0/5480=0	-3	-3	-4	deleterious	0	probably damaging	1	180	35
1916	AR	TRPM4	NM_017636.3	c.1744G>A	p.(Gly582Ser)	3		BRS	407	2	2	rs172149856	133/277230=0	2/24036=0	39/34420=0.001	0/10152=0	0/18870=0	0/25792=0	67/126712=0.001	12/30782=0	13/6466=0.002	0	0	-1	tolerated	0.14	benign	0.022	56	21.9
1917	AR	TRPM4	NM_017636.3	c.1744G>A(;)c.1744G>A	p.(Gly582Ser)	3		UA	230	2	2	rs172149856	133/277230=0	2/24036=0	39/34420=0.001	0/10152=0	0/18870=0	0/25792=0	67/126712=0.001	12/30782=0	13/6466=0.002	0	0	-1	tolerated	0.14	benign	0.022	56	21.9
1918	AR	TRPM4	NM_017636.3	c.1766C>T	p.(Ala589Val)	3		UA	98	1	1											0	0	0	deleterious	0	probably damaging	0.996	64	32
1919	AR	TRPM4	NM_017636.3	c.2531G>A	p.(Gly844Asp)	3		CPVT	99	1	1	rs200038418	179/183122=0.001	4/16554=0	33/26454=0.001	0/8596=0	0/12946=0	5/10786=0	123/79180=0.002	0/23676=0	14/4930=0.003	-1	-1	-2	tolerated	0.2	possibly damaging	0.918	94	22.9
1920	AR	TRPM4	NM_017636.3	c.2531G>A	p.(Gly844Asp)	3		UA	148	2	2	rs200038418	179/183122=0.001	4/16554=0	33/26454=0.001	0/8596=0	0/12946=0	5/10786=0	123/79180=0.002	0/23676=0	14/4930=0.003	-1	-1	-2	tolerated	0.12	possibly_damaging	0.525	94	16.34
1921	AR	TRPM4	NM_017636.3	c.2531G>A	p.(Gly844Asp)	3		UCM	231	4	2	rs200038418	179/183122=0.001	4/16554=0	33/26454=0.001	0/8596=0	0/12946=0	5/10786=0	123/79180=0.002	0/23676=0	14/4930=0.003	-1	-1	-2	tolerated	0.12	possibly_damaging	0.525	94	16.34
1922	AR	TRPM4	NM_017636.3	c.2531G>A	p.(Gly844Asp)	3		UCM	1383	4	2	rs200038418	179/183122=0.001	4/16554=0	33/26454=0.001	0/8596=0	0/12946=0	5/10786=0	123/79180=0.002	0/23676=0	14/4930=0.003	-1	-1	-2	tolerated	0.12	possibly_damaging	0.525	94	16.34
1923	AR	TRPM4	NM_017636.3	c.2992G>A	p.(Gly998Ser)	3		UA	302	3	2	rs144702920	6/276424=0	0/24028=0	2/34416=0	0/10152=0	0/18864=0	0/25576=0	2/126146=0	2/30782=0	0/6460=0	0	0	-1	tolerated	0.73	probably_damaging	0.929	56	15.79
1924	AR	TRPM4	NM_017636.3	c.3352G>A	p.(Glu1118Lys)	3		BRS	128	2	2		1/30966=0	0/8730=0	0/838=0	0/302=0	0/1622=0	0/3492=0	1/15000=0	0/0=0	0/982=0	1	1	1	tolerated	0.07	benign	0.029	56	22.6
1925	AR	TRPM4	NM_017636.3	c.512G>A	p.(Arg171Gln)	3		UA	116	3	2											1	1	1	deleterious	0.05	probably_damaging	0.915	43	25.3
1926	CM	TTN	NM_133378.4	c.[34531C>T; 46076T>C; 47598G>A]	p.[Arg11511*;Leu15359Pro;Asp15856_Gln15866del]	4, 3, 3 (mono-allelic)		DCM	1289	1	1
1927	CM	TTN	NM_133378.4	c.46944_46945dup	p.(Ser15649Ilefs*6)	4		UCM	231	4	1
1928	CM	TTN	NM_133378.4	c.41559C>A	p.(Tyr13853*)	5		UCM	1370	1	1	rs376188859										-5	-4	-6	NA	NA	NA	NA	NA	51
1929	CM	TTN	NM_133378.4	c.52222+1G>A	p.?	5		DCM	1395	3	1	rs553526525	1/242982=0	0/15222=0	0/33090=0	0/9766=0	0/16950=0	0/22244=0	1/110148=0	0/30166=0	0/5396=0				NA	NA	NA	NA	NA	34
1930	CM	TTN	NM_133378.4	c.52222+1G>A	p.?	5		UCM	1396	1	1	rs553526525	1/242982=0	0/15222=0	0/33090=0	0/9766=0	0/16950=0	0/22244=0	1/110148=0	0/30166=0	0/5396=0				NA	NA	NA	NA	NA	34
1931	CM	TTN	NM_133378.4	c.78936C>A	p.(Tyr26312*)	5		DCM	1492	1	1	rs794729298										-5	-4	-6	NA	NA	NA	NA	NA	64	35
1932	CM	TTN	NM_133378.4	c.78936C>A	p.(Tyr26312*)	5		UCM	1616	1	1	rs794729298										-5	-4	-6	NA	NA	NA	NA	NA	64	34
1933	CM	TTN	NM_133378.4	c.78936C>A	p.(Tyr26312*)	5		DCM	1617	1	1	rs794729298										-5	-4	-6	NA	NA	NA	NA	NA	64	34
1934	CM	TTN	NM_133378.4	c.97709T>C	p.(Met32570Thr)	5		ARVC	1144	3	3	rs771741670	7/276954=0	1/24008=0	0/34416=0	0/10142=0	0/18856=0	0/25794=0	6/126500=0	0/30782=0	0/6456=0	-1	-1	-1	NA	NA	NA	NA	81	23.0
1935	CM	TTN	NM_001267550.2	c.11444del	p.(Lys3815Argfs*17)	4		DCM	1176	2	2											#N/A	#N/A	#N/A	NA	NA	NA	NA	NA	29.4
1936	CM	TTN	NM_133378.4	c.13059del	p.(Asp4354Thrfs*13)	4		DCM	1529	3	1											0	0	0	NA	NA	NA	NA	NA	28.7	NA
1937	CM	TTN	NM_133378.4	c.33625+1G>T	p.?	4		DCM	1583	2	1	rs796238032													NA	NA	NA	NA	NA	34	26.5
1938	CM	TTN	NM_133378.4	c.38993-1G>T	p.?	4		UCM	1364	2	1														NA	NA	NA	NA	NA	32
1939	CM	TTN	NM_133378.4	c.40311_40312del	p.(Asp13439Profs*19)	4		NCCM	1366	1	1														NA	NA	NA	NA	NA	40
1940	CM	TTN	NM_133378.4	c.42379C>T	p.(Arg14127*)	4		UCM	1372	2	1	rs751502842										-5	-4	-6	NA	NA	NA	NA	NA	60
1941	CM	TTN	NM_133378.4	c.42925_42928dup	p.(Lys14310Argfs*14)	4		ARVC	1374	4	1														NA	NA	NA	NA	NA	49
1942	CM	TTN	NM_133378.4	c.43733-2A>T	p.?	4		HCM	1377	1	1														NA	NA	NA	NA	NA	33
1943	CM	TTN	NM_133378.4	c.46214del	p.(Gly15405Glufs*18)	4		DCM	1380	2	1		1/235912=0	0/14834=0	0/14834=0	0/9250=0	0/16616=0	0/21362=0	1/107106=0	0/29204=0	0/5232=0				NA	NA	NA	NA	NA	53
1944	CM	TTN	NM_133378.4	c.46214del	p.(Gly15405Glufs*18)	4		DCM	1581	2	2		1/235912=0	0/14834=0	0/14834=0	0/9250=0	0/16616=0	0/21362=0	1/107106=0	0/29204=0	0/5232=0				NA	NA	NA	NA	NA	53	26.5
1945	CM	TTN	NM_133378.4	c.46214del	p.(Gly15405Glufs*18)	4		DCM	1598	1	1		1/235912=0	0/14834=0	0/14834=0	0/9250=0	0/16616=0	0/21362=0	1/107106=0	0/29204=0	0/5232=0				NA	NA	NA	NA	NA	53	24.3
1946	CM	TTN	NM_133378.4	c.46837G>T	p.(Gly15613*)	4		UCM	1382	4	1	rs761810379										-5	-4	-6	NA	NA	NA	NA	NA	61
1947	CM	TTN	NM_133378.4	c.46944_46945dup	p.(Ser15649Ilefs*6)	4		UCM	1383	4	1														NA	NA	NA	NA	NA	54
1948	CM	TTN	NM_133378.4	c.49683T>G	p.(Asn16561Lys)	4		DCM	1407	2	2	rs375305621	3/244810=0	0/15280=0	0/33506=0	0/9814=0	0/17132=0	0/22296=0	3/110546=0	0/30776=0	0/5460=0	0	0	0	NA	NA	NA	NA	94	22.6
1949	CM	TTN	NM_133378.4	c.50144-1G>A	p.?	4		DCM	1175	4	2														NA	NA	NA	NA	NA	34
1950	CM	TTN	NM_133378.4	c.51497_51498del	p.(Pro17166Argfs*5)	4		DCM	1606	2	1	rs752948913	1/245614=0	0/15282=0	0/15282=0	0/9832=0	0/17230=0	0/22298=0	1/111162=0	0/30780=0	0/5462=0				NA	NA	NA	NA	NA	59	10.11
1951	CM	TTN	NM_133378.4	c.51647_51648del	p.(Pro17216Argfs*5)	4		DCM	1391	3	1	rs752948913	1/245614=0	0/15282=0	0/15282=0	0/9832=0	0/17230=0	0/22298=0	1/111162=0	0/30780=0	0/5462=0				NA	NA	NA	NA	NA	59
1952	CM	TTN	NM_133378.4	c.51922+1G>A	p.?	4		UCM	1392	1	1														NA	NA	NA	NA	NA	34
1953	CM	TTN	NM_133378.4	c.52222+1G>A	p.?	4	5 (cosegregation)	DCM	1394	1	1	rs553526525	1/242982=0	0/15222=0	0/33090=0	0/9766=0	0/16950=0	0/22244=0	1/110148=0	0/30166=0	0/5396=0				NA	NA	NA	NA	NA	34
1954	CM	TTN	NM_133378.4	c.54511del	p.(Tyr18171Metfs*17)	4		UCM	1398	2	1														NA	NA	NA	NA	NA	59
1955	CM	TTN	NM_133378.4	c.55246del	p.(Trp18416Glyfs*12)	4		NCCM	1402	2	1														NA	NA	NA	NA	NA	59
1956	CM	TTN	NM_133378.4	c.56968+2T>C	p.?	4		DCM	1404	1	1														NA	NA	NA	NA	NA	27.0
1957	CM	TTN	NM_133378.4	c.58316_58317del	p.(Ser19439Cysfs*18)	4		DCM	1405	2	1														NA	NA	NA	NA	NA	60
1958	CM	TTN	NM_133378.4	c.58759+1G>T	p.?	4		DCM	1407	2	1		1/244868=0	0/15264=0	0/33476=0	0/9820=0	0/17032=0	0/22270=0	1/110828=0	0/30740=0	0/5438=0				NA	NA	NA	NA	NA	33
1959	CM	TTN	NM_133378.4	c.60780del	p.(Lys20260Asnfs*26)	4		DCM	1412	2	1														NA	NA	NA	NA	NA	57
1960	CM	TTN	NM_133378.4	c.63231del	p.(Ala21079Leufs*19)	4		DCM	1416	3	1														NA	NA	NA	NA	NA	60	33
1961	CM	TTN	NM_133378.4	c.63603_63606del	p.(Asp21202Valfs*7)	4		DCM	1417	2	1														NA	NA	NA	NA	NA	60	25.0
1962	CM	TTN	NM_133378.4	c.67546C>T	p.(Arg22516*)	4		UCM	1562	3	3	rs794729286										-5	-4	-6	NA	NA	NA	NA	NA	62	21.7
1963	CM	TTN	NM_133378.4	c.68950C>T	p.(Arg22984*)	4		UCM	1426	1	1	rs545954490	1/244858=0	0/15264=0	0/33468=0	0/9806=0	1/17092=0	0/22214=0	0/110870=0	0/30716=0	0/5428=0	-5	-4	-6	NA	NA	NA	NA	NA	64	23.6
1964	CM	TTN	NM_133378.4	c.69671_69674dup	p.(Asp23225Glufs*6)	4		DCM	1428	1	1														NA	NA	NA	NA	NA	62	26.3
1965	CM	TTN	NM_133378.4	c.70209T>A	p.(Tyr23403*)	4		DCM	1429	1	1	rs72648203										-5	-4	-6	NA	NA	NA	NA	NA	62	26.3
1966	CM	TTN	NM_133378.4	c.70209T>A	p.(Tyr23403*)	4		UCM	1430	1	1	rs72648203										-5	-4	-6	NA	NA	NA	NA	NA	62	26.3
1967	CM	TTN	NM_133378.4	c.71202A>C	p.(Glu23734Asp)	4		DCM	1140	2	2	rs534003014	16/272674=0	1/23962=0	0/34064=0	0/9766=0	0/18752=0	0/25414=0	15/124472=0	0/29906=0	0/6338=0	2	2	1	NA	NA	NA	NA	0	21.2
1968	CM	TTN	NM_133378.4	c.73365del	p.(Ser24456Glnfs*11)	4		UCM	1438	1	1														NA	NA	NA	NA	NA	61	26.5
1969	CM	TTN	NM_133378.4	c.75191_75192del	p.(Thr25064Serfs*5)	4		DCM	1614	1	1														NA	NA	NA	NA	NA	62	28.0
1970	CM	TTN	NM_133378.4	c.76438dup	p.(Ile25480Asnfs*7)	4		DCM	1441	1	1	rs770523023													NA	NA	NA	NA	NA	62	23.9
1971	CM	TTN	NM_133378.4	c.78936C>A	p.(Tyr26312*)	4	5 (more patients/families)	DCM	1445	1	1	rs794729298										-5	-4	-6	NA	NA	NA	NA	NA	64	23.5
1972	CM	TTN	NM_133378.4	c.79038_79041del	p.(Tyr26347Thrfs*22)	4		UCM	1446	4	1		1/30960=0	0/8736=0	0/8736=0	0/302=0	0/1594=0	0/3494=0	1/15014=0	0/0=0	0/982=0				NA	NA	NA	NA	NA	63	23.5
1973	CM	TTN	NM_133378.4	c.79461T>A	p.(Tyr26487*)	4		DCM	1448	3	1	rs756211633										-5	-4	-6	NA	NA	NA	NA	NA	63	9.644
1974	CM	TTN	NM_133378.4	c.80018_80036del	p.(Pro26673Leufs*24)	4		DCM	1449	2	1														NA	NA	NA	NA	NA	64	23.3
1975	CM	TTN	NM_133378.4	c.80773del	p.(Thr26925Argfs*21)	4		DCM	1451	2	1														NA	NA	NA	NA	NA	63	23.9
1976	CM	TTN	NM_133378.4	c.81954C>A	p.(Tyr27318*)	4		DCM	1453	1	1											-5	-4	-6	NA	NA	NA	NA	NA	65	14.08
1977	CM	TTN	NM_133378.4	c.8307_8308del	p.(Ala2770Hisfs*4)	4		NCCM	1455	1	1	rs869312037													NA	NA	NA	NA	NA	32	34
1978	CM	TTN	NM_133378.4	c.88564C>T	p.(Gln29522*)	4		DCM	1467	2	1	rs876657671										-5	-4	-6	NA	NA	NA	NA	NA	68	23.7
1979	CM	TTN	NM_133378.4	c.88564C>T	p.(Gln29522*)	4		DCM	1468	2	1	rs876657671										-5	-4	-6	NA	NA	NA	NA	NA	68	23.7
1980	CM	TTN	NM_133378.4	c.89134C>T	p.(Gln29712*)	4		DCM	1469	1	1											-5	-4	-6	NA	NA	NA	NA	NA	67	30
1981	CM	TTN	NM_133378.4	c.89723dup	p.(Thr29909Asnfs*13)	4		DCM	1471	4	1														NA	NA	NA	NA	NA	64	27.0
1982	CM	TTN	NM_133378.4	c.93314del	p.(Asn31105Thrfs*36)	4		DCM	1476	1	1														NA	NA	NA	NA	NA	64	26.1
1983	CM	TTN	NM_133378.4	c.93523C>T	p.(Arg31175*)	4		DCM	1477	1	1	rs794729305										-5	-4	-6	NA	NA	NA	NA	NA	68	11.12
1984	CM	TTN	NM_133378.4	c.94411_94414del	p.(Phe31471Lysfs*15)	4		DCM	1611	2	2														NA	NA	NA	NA	NA	65	25.5
1985	CM	TTN	NM_133378.4	c.100017C>A	p.(Ser33339Arg)	3		HCM	1290	1	1		2/274384=0	0/23916=0	0/34116=0	0/10022=0	0/18760=0	0/25650=0	2/125096=0	0/30416=0	0/6408=0	-1	-1	-1	NA	NA	NA	NA	110	23.2
1986	CM	TTN	NM_133378.4	c.100019T>	p.(Leu7739Phe)	3		HCM	1326	3	3	rs769141222	8/274888=0	0/23940=0	0/34200=0	0/10032=0	0/18778=0	0/25664=0	7/125326=0	0/30536=0	1/6412=0	-1	-1	-1	NA	NA	NA	NA	89	24.1
1987	CM	TTN	NM_133378.4	c.100051G>A	p.(Ala33351Thr)	3		DCM	1291	1	1											0	0	0	NA	NA	NA	NA	58	24.9
1988	CM	TTN	NM_133378.4	c.100253T>A	p.(Ile33418Lys)	3		UCM	1292	1	1											-3	-3	-3	NA	NA	NA	NA	102	24.5
1989	CM	TTN	NM_133378.4	c.10534A>G	p.(Ser3512Gly)	3		HCM	1293	1	1											0	0	-1	NA	NA	NA	NA	56	20.4
1990	CM	TTN	NM_133379.3	c.10575T>A	p.(Cys3525*)	3		DCM	1294	1	1											-5	-4	-6	NA	NA	NA	NA	NA	16.86
1991	CM	TTN	NM_133378.4	c.10577A>G	p.(Tyr3526Cys)	3		DCM	842	4	4	rs371552518	29/276552=0	0/24020=0	0/34378=0	0/10128=0	0/18796=0	0/25780=0	29/126236=0	0/30774=0	0/6440=0	-3	-2	-3	NA	NA	NA	NA	194	23.3
1992	CM	TTN	NM_133378.4	c.10577A>G	p.(Tyr3526Cys)	3		DCM	1055	2	2	rs371552518	29/276552=0	0/24020=0	0/34378=0	0/10128=0	0/18796=0	0/25780=0	29/126236=0	0/30774=0	0/6440=0	-3	-2	-3	NA	NA	NA	NA	194	23.3
1993	CM	TTN	NM_133378.4	c.10577A>G	p.(Tyr3526Cys)	3		NCCM	1295	2	1	rs371552518	29/276552=0	0/24020=0	0/34378=0	0/10128=0	0/18796=0	0/25780=0	29/126236=0	0/30774=0	0/6440=0	-3	-2	-3	NA	NA	NA	NA	194	23.3
1994	CM	TTN	NM_133378.4	c.10577A>G	p.(Tyr3526Cys)	3		ARVC	1517	3	1	rs371552518	29/276552=0	0/24020=0	0/34378=0	0/10128=0	0/18796=0	0/25780=0	29/126236=0	0/30774=0	0/6440=0	-3	-2	-3	NA	NA	NA	NA	194	23.3	NA
1995	CM	TTN	NM_001267550.1	c.10634C>T	p.(Ala3545Val)	3		DCM	741	3	3		1/241944=0	0/15224=0	0/33178=0	0/9516=0	0/17186=0	0/21960=0	1/109524=0	0/29982=0	0/5374=0	0	0	0	NA	NA	NA	NA	64	22.6
1996	CM	TTN	NM_133378.4	c.10754A>C	p.(Gln3585Pro)	3		ARVC	1215	3	2	rs375177753	33/276780=0	1/24018=0	1/34386=0	0/10146=0	0/18816=0	0/25764=0	31/126426=0	0/30776=0	0/6448=0	-1	-1	-2	NA	NA	NA	NA	76	22.5
1997	CM	TTN	NM_133378.4	c.10786A>C	p.(Asn3596His)	3		UCM	231	4	4	rs199997460	21/276832=0	0/24018=0	0/34392=0	0/10144=0	0/18814=0	3/25788=0	18/126446=0	0/30782=0	0/6448=0	1	1	0	NA	NA	NA	NA	NA
1998	CM	TTN	NM_133378.4	c.10786A>C	p.(Asn3596His)	3		DCM	1296	1	1	rs199997460	21/276832=0	0/24018=0	0/34392=0	0/10144=0	0/18814=0	3/25788=0	18/126446=0	0/30782=0	0/6448=0	1	1	0	NA	NA	NA	NA	68	12.83
[truncated: 606 more rows]
